# Supplementary material for: Serological Profiling of a Candida albicans Protein Microarray Reveals Permanent Host-Pathogen Interplay and Stage-Specific Responses during Candidemia
Source: PLOS journal article supplement (doi:10.1371/journal.ppat.1000827), 2010-03-25
Supplement: S7 (10.1371/journal.ppat.1000827.s007) [file journal.ppat.1000827.s007.xls]

## Sheet: Acute Candidiasis
Gene	Mean1 (Controls)	Mean2 (Ca patients)	Mean2-Mean1	SD1	SD2	bayesSD1	bayesSD2	MSE.B	MSE.W	Fstat	dfBetBayes	dfWithBayes	p.value	Bonferroni	BH	Reps_Cond_1	Reps_Cond_2	StdErr_Cond_1	StdErr_Cond_2	AUC	AUC_Pval	Bonferroni_AUC	BH_AUC
19.1002	5.11829	5.40601	0.287716	0.510979	0.563649	0.52126	0.593094	1.15479	0.289159	3.9936	1	96	0.0485019	1	0.176845	62	18	0.0662001	0.139794	0.65233	0.0508284	1	0.18252
19.111	6.05503	6.20986	0.15483	0.683538	0.487965	0.676575	0.548331	0.334415	0.423517	0.7896	1	96	0.376442	1	0.60486	62	18	0.0859251	0.129243	0.592294	0.237614	1	0.47125
19.1193	7.55696	7.15027	-0.40669	1.21219	1.25319	1.16727	1.12278	2.30728	1.34032	1.7214	1	96	0.192642	1	0.419036	62	18	0.148244	0.264643	0.59767	0.211262	1	0.457252
19.1376	6.89527	6.64135	-0.253919	0.704003	0.512066	0.688217	0.548738	0.899424	0.43604	2.0627	1	96	0.154193	1	0.369129	62	18	0.0874037	0.129339	0.592294	0.237614	1	0.47125
19.1442	4.86031	4.94065	0.0803404	0.455855	0.634883	0.47259	0.629223	0.0900413	0.260955	0.345	1	96	0.558336	1	0.757537	62	18	0.0600191	0.148309	0.501792	0.986211	1	0.996725
19.1582	5.85058	6.08919	0.238607	0.668705	0.808001	0.660409	0.791083	0.794217	0.477479	1.6634	1	96	0.200243	1	0.424252	62	18	0.0838721	0.18646	0.586022	0.271192	1	0.514181
19.1585	6.10056	6.30109	0.200536	0.710639	0.943871	0.697402	0.867654	0.560997	0.544443	1.0304	1	96	0.312616	1	0.531111	62	18	0.0885701	0.204508	0.525986	0.742633	1	0.858557
19.1607	6.08252	6.12175	0.0392234	0.828508	0.817656	0.806328	0.79576	0.0214618	0.646474	0.0332	1	96	0.855803	1	0.919843	62	18	0.102404	0.187563	0.511649	0.885484	1	0.938969
19.1738	7.08547	7.13431	0.0488412	0.722334	0.909877	0.717366	0.865673	0.0332772	0.565783	0.0588	1	96	0.80892	1	0.889624	62	18	0.0911055	0.204041	0.511649	0.885484	1	0.938969
19.1943	6.09304	5.8214	-0.271639	0.478647	0.445077	0.50441	0.516733	1.02934	0.257172	4.0025	1	96	0.0482571	1	0.176845	62	18	0.0640601	0.121795	0.689964	0.0148164	1	0.0852928
19.1978	5.95656	5.82961	-0.126954	0.473918	0.502734	0.503055	0.536451	0.224835	0.260631	0.8627	1	96	0.355314	1	0.583037	62	18	0.0638881	0.126443	0.576165	0.330264	1	0.579797
19.1979	6.09215	6.07689	-0.0152628	0.81362	0.929209	0.793162	0.879959	0.0032497	0.660757	0.0049	1	96	0.944339	1	0.968868	62	18	0.100732	0.207408	0.501792	0.986211	1	0.996725
19.198	6.17534	6.46987	0.294532	0.55563	0.963336	0.559055	0.858755	1.21015	0.405153	2.9869	1	96	0.0871559	1	0.260617	62	18	0.0710001	0.20241	0.574373	0.341838	1	0.591356
19.2003	7.72111	7.60032	-0.120793	0.25554	0.431276	0.331169	0.551408	0.203545	0.152037	1.3388	1	96	0.250117	1	0.470458	62	18	0.0420585	0.129968	0.568996	0.378097	1	0.613759
19.2072	6.5394	6.72523	0.185835	0.514125	0.497744	0.536797	0.544665	0.481756	0.290006	1.6612	1	96	0.200539	1	0.424252	62	18	0.0681733	0.128379	0.620968	0.121222	1	0.317453
19.2175	6.31761	6.38919	0.0715788	0.477428	0.424623	0.493422	0.499138	0.0714731	0.244702	0.2921	1	96	0.59013	1	0.771912	62	18	0.0626647	0.117648	0.545699	0.560671	1	0.740273
19.2222	6.67016	6.67263	0.00246957	0.484222	0.427606	0.493237	0.458504	8.50778e-05	0.236078	0.0004	1	96	0.984085	1	0.988255	62	18	0.0626412	0.10807	0.55914	0.450447	1	0.663008
19.2312	6.65436	6.02984	-0.624525	0.565589	0.715242	0.565561	0.695193	5.44094	0.355479	15.3059	1	96	0.000170709	0.0809162	0.00351809	62	18	0.0718263	0.163859	0.777778	0.000362524	0.171837	0.00937869
19.2337	6.72699	6.12477	-0.602217	0.611826	0.758565	0.625011	0.800131	5.05918	0.445033	11.3681	1	96	0.00107801	0.510977	0.0118832	62	18	0.0793765	0.188593	0.746416	0.00156312	0.740918	0.0197636
19.2397	5.83655	6.27122	0.434669	0.442231	0.424019	0.463036	0.503401	2.63567	0.222905	11.8242	1	96	0.000866348	0.410649	0.0105295	62	18	0.0588056	0.118653	0.78853	0.000212041	0.100507	0.00773133
19.24	6.87698	6.81559	-0.0613898	0.407221	0.343122	0.425662	0.49258	0.0525735	0.194581	0.2702	1	96	0.604394	1	0.780607	62	18	0.0540592	0.116102	0.550179	0.522528	1	0.70968
19.2429	6.38891	6.47651	0.0875971	0.426522	0.481045	0.455415	0.552996	0.107042	0.22885	0.4677	1	96	0.495695	1	0.701371	62	18	0.0578378	0.130343	0.526882	0.73394	1	0.85476
19.2445	6.32238	6.23927	-0.0831107	0.555634	0.598276	0.562525	0.621637	0.096358	0.33169	0.2905	1	96	0.591148	1	0.771912	62	18	0.0714408	0.146521	0.518817	0.813282	1	0.894421
19.2492	5.99906	5.77189	-0.227173	0.55074	0.454831	0.558734	0.523236	0.719927	0.303813	2.3696	1	96	0.127009	1	0.329795	62	18	0.0709593	0.123328	0.612007	0.151444	1	0.368125
19.2517	6.03301	6.41682	0.383807	0.631662	0.432959	0.636192	0.546903	2.05494	0.381717	5.3834	1	96	0.0224472	1	0.110833	62	18	0.0807965	0.128906	0.68638	0.016814	1	0.0895488
19.2583	6.28854	6.4864	0.197859	0.600913	0.57763	0.614052	0.615651	0.54612	0.377488	1.4467	1	96	0.232016	1	0.45367	62	18	0.0779846	0.14511	0.592294	0.237614	1	0.47125
19.2587	3.59052	3.8249	0.234378	0.636097	0.621406	0.619562	0.642441	0.766319	0.39015	1.9642	1	96	0.16429	1	0.385511	62	18	0.0786844	0.151425	0.681004	0.0202534	1	0.103227
19.2671	6.337	6.07833	-0.258672	0.637919	0.665519	0.636839	0.696637	0.933412	0.422942	2.2069	1	96	0.140671	1	0.350937	62	18	0.0808786	0.164199	0.594982	0.224161	1	0.466019
19.2677	5.97356	6.13904	0.16548	0.561261	0.57824	0.570193	0.624932	0.382001	0.339378	1.1256	1	96	0.291378	1	0.517694	62	18	0.0724146	0.147298	0.566308	0.397082	1	0.625305
19.2787	8.21643	7.65677	-0.559657	0.368317	0.627473	0.497324	0.703714	4.36937	0.301357	14.499	1	96	0.000247121	0.117135	0.00450521	62	18	0.0631603	0.165867	0.78853	0.000212041	0.100507	0.00773133
19.281	6.40088	6.22941	-0.171474	0.560273	0.751789	0.573472	0.735587	0.410176	0.375123	1.0934	1	96	0.298345	1	0.523761	62	18	0.0728311	0.173379	0.576165	0.330264	1	0.579797
19.2945	6.3948	6.1992	-0.195598	0.527855	0.512187	0.540567	0.612178	0.533709	0.310204	1.7205	1	96	0.192757	1	0.419036	62	18	0.0686521	0.144292	0.584229	0.281356	1	0.520949
19.2946	5.82447	6.06807	0.243607	0.768581	1.08523	0.749009	0.962925	0.827856	0.640829	1.2919	1	96	0.258527	1	0.476857	62	18	0.0951242	0.226964	0.592294	0.237614	1	0.47125
19.2991	5.69494	5.60936	-0.0855772	0.550492	0.619716	0.568035	0.645966	0.102162	0.343284	0.2976	1	96	0.586656	1	0.770291	62	18	0.0721405	0.152256	0.56362	0.416632	1	0.64118
19.3112	5.37118	5.67212	0.300941	0.589818	0.707667	0.601079	0.706107	1.26339	0.391219	3.2294	1	96	0.0754717	1	0.241713	62	18	0.0763372	0.166431	0.629032	0.0982572	1	0.277226
19.3195	7.02298	6.9636	-0.0593832	0.452768	0.53394	0.477571	0.584526	0.0491927	0.252832	0.1946	1	96	0.660107	1	0.816947	62	18	0.0606516	0.137774	0.551075	0.515062	1	0.701551
19.3232	7.40821	7.03545	-0.372767	0.411536	0.442397	0.455945	0.498144	1.93843	0.216661	8.9468	1	96	0.00353198	1	0.0293712	62	18	0.057905	0.117414	0.729391	0.00324219	1	0.0313632
19.3362	6.42344	6.27401	-0.149437	0.533106	0.41812	0.555746	0.508152	0.311524	0.297818	1.046	1	96	0.309	1	0.528759	62	18	0.0705798	0.119773	0.592294	0.237614	1	0.47125
19.34	6.05366	5.77149	-0.282178	0.491975	0.590821	0.515631	0.604225	1.11076	0.287499	3.8635	1	96	0.0522367	1	0.185084	62	18	0.0654853	0.142417	0.646953	0.0595926	1	0.203215
19.3538	7.22986	7.16642	-0.0634396	0.549555	0.500437	0.574812	0.624808	0.0561429	0.34348	0.1635	1	96	0.686854	1	0.835726	62	18	0.0730011	0.147269	0.535842	0.649033	1	0.80115
19.3542	6.2603	6.19435	-0.0659482	0.629629	0.535829	0.628838	0.626099	0.0606708	0.394688	0.1537	1	96	0.695893	1	0.837191	62	18	0.0798625	0.147573	0.587814	0.261283	1	0.501409
19.3641	6.31026	5.79416	-0.5161	0.643498	0.907891	0.641954	0.826454	3.7157	0.471151	7.8864	1	96	0.00603417	1	0.0454	62	18	0.0815282	0.194797	0.697133	0.0114385	1	0.0753033
19.377	6.3964	6.58017	0.183769	0.589756	0.468679	0.595712	0.566357	0.471107	0.347438	1.3559	1	96	0.247135	1	0.466701	62	18	0.0756555	0.133492	0.608423	0.165027	1	0.385333
19.3795	6.6176	6.38869	-0.228911	0.678041	0.599857	0.672324	0.604381	0.730984	0.433114	1.6877	1	96	0.197016	1	0.422559	62	18	0.0853853	0.142454	0.567204	0.390691	1	0.625305
19.417	6.87266	6.83743	-0.0352307	0.312884	0.407428	0.347457	0.531251	0.0173147	0.155925	0.111	1	96	0.739735	1	0.864424	62	18	0.044127	0.125217	0.553763	0.493003	1	0.693423
19.4175	6.45793	6.32061	-0.137326	0.576415	0.641121	0.575008	0.628678	0.263075	0.344714	0.7632	1	96	0.384509	1	0.613661	62	18	0.0730261	0.148181	0.558244	0.457392	1	0.663008
19.4213	6.57432	6.52408	-0.0502418	0.570509	0.579576	0.582201	0.606495	0.0352131	0.345252	0.102	1	96	0.750137	1	0.868375	62	18	0.0739396	0.142952	0.513441	0.867319	1	0.933507
19.4335	5.81086	5.97898	0.168114	0.43185	0.50004	0.460469	0.576508	0.394261	0.238258	1.6548	1	96	0.201401	1	0.424252	62	18	0.0584796	0.135884	0.577061	0.324573	1	0.576208
19.4463	6.35633	6.1757	-0.180632	0.726738	0.74586	0.724253	0.750655	0.455157	0.53303	0.8539	1	96	0.357768	1	0.584766	62	18	0.0919803	0.176931	0.5681	0.384362	1	0.617585
19.45	6.63446	6.58655	-0.0479044	0.552258	0.94898	0.555707	0.883795	0.0320129	0.411743	0.0777	1	96	0.781038	1	0.880099	62	18	0.0705748	0.208312	0.500896	0.995404	1	0.999621
19.4515	6.96359	6.67828	-0.285305	0.463583	0.529529	0.492689	0.537392	1.13552	0.252779	4.4921	1	96	0.0366318	1	0.144166	62	18	0.0625716	0.126665	0.65233	0.0508284	1	0.18252
19.4526	6.209	6.37925	0.170257	0.545694	0.492341	0.547584	0.503748	0.404374	0.289804	1.3953	1	96	0.24043	1	0.461392	62	18	0.0695433	0.118734	0.637097	0.0789081	1	0.246069
19.4546	5.68578	5.81364	0.127863	0.547172	0.63741	0.564644	0.638266	0.228068	0.338125	0.6745	1	96	0.413522	1	0.644768	62	18	0.0717099	0.150441	0.55914	0.450447	1	0.663008
19.465	6.63204	6.59747	-0.0345646	0.435737	0.447258	0.465012	0.568147	0.0166663	0.23946	0.0696	1	96	0.792486	1	0.880099	62	18	0.0590566	0.133914	0.525986	0.742633	1	0.858557
19.4679	6.0163	5.82232	-0.193985	0.513535	0.508627	0.527026	0.547519	0.52494	0.282556	1.8578	1	96	0.176067	1	0.397409	62	18	0.0669324	0.129051	0.620968	0.121222	1	0.317453
19.469	6.79512	7.07951	0.284391	0.612196	0.702095	0.612869	0.663512	1.12825	0.389697	2.8952	1	96	0.0920805	1	0.266135	62	18	0.0778345	0.156391	0.600358	0.198908	1	0.438524
19.4889	6.04789	6.12239	0.0744995	0.98101	0.721239	0.946944	0.734043	0.0774249	0.818703	0.0946	1	96	0.759075	1	0.868972	62	18	0.120262	0.173016	0.533154	0.67409	1	0.808908
19.494	6.73093	6.89792	0.166999	0.494849	0.549362	0.525883	0.626117	0.389048	0.30172	1.2894	1	96	0.258986	1	0.476857	62	18	0.0667872	0.147577	0.581541	0.297081	1	0.541602
19.5022	5.46081	5.66097	0.20016	0.735152	0.514274	0.718916	0.597519	0.558894	0.48201	1.1595	1	96	0.284268	1	0.512331	62	18	0.0913024	0.140837	0.629928	0.095936	1	0.277226
19.508	4.16015	4.8373	0.677152	0.645387	0.669386	0.627764	0.667978	6.39655	0.405444	15.7767	1	96	0.000137802	0.0653181	0.00320101	62	18	0.0797261	0.157444	0.836918	1.51571e-05	0.00718446	0.00179612
19.5307	5.87794	5.99865	0.120714	0.760322	0.466567	0.750975	0.542022	0.203277	0.505079	0.4025	1	96	0.52731	1	0.737301	62	18	0.0953739	0.127756	0.561828	0.429974	1	0.651143
19.5392	6.04271	6.04128	-0.00143423	0.6204	0.565739	0.626088	0.584395	2.86955e-05	0.380987	0.0001	1	96	0.992042	1	0.994139	62	18	0.0795133	0.137743	0.506272	0.940301	1	0.97528
19.5401	5.87047	6.18052	0.310053	1.12577	1.25342	1.07963	1.10833	1.34106	1.17929	1.1372	1	96	0.288919	1	0.516784	62	18	0.137113	0.261237	0.56362	0.416632	1	0.64118
19.5406	6.8387	6.73635	-0.102348	0.44302	0.57076	0.471872	0.597376	0.146128	0.251911	0.5801	1	96	0.44814	1	0.666706	62	18	0.0599277	0.140803	0.521505	0.786576	1	0.875204
19.5535	6.01455	6.00194	-0.0126131	0.677104	0.690622	0.66632	0.685679	0.00221931	0.449687	0.0049	1	96	0.944339	1	0.968868	62	18	0.0846227	0.161616	0.506272	0.940301	1	0.97528
19.555	5.85963	6.2381	0.378464	0.577437	0.661782	0.590443	0.655842	1.99813	0.366387	5.4536	1	96	0.0216102	1	0.107824	62	18	0.0749863	0.154584	0.647849	0.0580504	1	0.200846
19.5632	8.13459	7.7807	-0.353884	1.03016	1.24666	1.00864	1.20677	1.74701	1.11301	1.5696	1	96	0.213308	1	0.435811	62	18	0.128097	0.284438	0.628136	0.100623	1	0.282221
19.5672	7.66581	7.50942	-0.156396	0.771754	0.535079	0.764186	0.592173	0.341213	0.53313	0.64	1	96	0.425686	1	0.652435	62	18	0.0970517	0.139576	0.566308	0.397082	1	0.625305
19.6055	6.94463	6.82208	-0.122551	0.865578	0.682978	0.839997	0.677315	0.209511	0.651797	0.3214	1	96	0.572091	1	0.764527	62	18	0.10668	0.159645	0.544803	0.568458	1	0.746397
19.6138	6.12221	6.06921	-0.053002	0.623853	0.628692	0.624493	0.641998	0.0391886	0.394823	0.0993	1	96	0.753355	1	0.868375	62	18	0.0793107	0.15132	0.541219	0.600114	1	0.764661
19.6139	6.0191	6.02643	0.00732441	0.581638	0.587109	0.586452	0.604306	0.000748376	0.348559	0.0021	1	96	0.963544	1	0.975614	62	18	0.0744794	0.142436	0.503584	0.967833	1	0.988692
19.6173	6.34216	6.46816	0.125998	0.680452	0.605551	0.679918	0.614447	0.221464	0.443818	0.499	1	96	0.481651	1	0.688597	62	18	0.0863496	0.144826	0.573477	0.347722	1	0.595019
19.6224	5.09369	5.33698	0.24329	0.41685	0.480328	0.437814	0.558854	0.825698	0.217973	3.7881	1	96	0.054542	1	0.18734	62	18	0.0556024	0.131723	0.65233	0.0508284	1	0.18252
19.6465	6.16401	5.87166	-0.292359	0.528203	0.698994	0.536586	0.705389	1.19236	0.333618	3.574	1	96	0.0617068	1	0.208922	62	18	0.0681466	0.166262	0.640681	0.0713656	1	0.231694
19.651	7.15894	6.86613	-0.292814	0.44418	0.547519	0.46827	0.653581	1.19607	0.264587	4.5205	1	96	0.0360564	1	0.144166	62	18	0.0594704	0.154051	0.670251	0.0290094	1	0.128509
19.654	6.52213	6.3428	-0.179329	0.432103	0.382345	0.455465	0.490984	0.448619	0.214775	2.0888	1	96	0.151639	1	0.366719	62	18	0.0578441	0.115726	0.626344	0.105491	1	0.289033
19.6578	6.31221	6.26739	-0.0448186	0.630006	0.629281	0.626891	0.629358	0.0280214	0.393668	0.0712	1	96	0.79017	1	0.880099	62	18	0.0796152	0.148341	0.500896	0.995404	1	0.999621
19.6656	5.16425	5.23452	0.0702712	0.700149	0.658907	0.69035	0.66622	0.0688857	0.469449	0.1467	1	96	0.702556	1	0.843067	62	18	0.0876746	0.157029	0.558244	0.457392	1	0.663008
19.6854	5.98003	5.46533	-0.514702	0.951598	0.952278	0.914184	0.884803	3.69561	0.824212	4.4838	1	96	0.0368018	1	0.144166	62	18	0.116101	0.20855	0.676523	0.0235734	1	0.112867
19.6937	5.80421	6.02099	0.216779	0.572888	0.556468	0.573802	0.572479	0.655554	0.328918	1.9931	1	96	0.16125	1	0.382163	62	18	0.0728729	0.134935	0.601254	0.19491	1	0.431717
19.6992	6.78412	6.68587	-0.0982498	0.422075	0.428152	0.456547	0.472284	0.13466	0.211621	0.6363	1	96	0.427022	1	0.652435	62	18	0.0579816	0.111318	0.565412	0.403536	1	0.631275
19.6993	6.21628	6.20336	-0.0129247	0.56541	0.630675	0.564979	0.624995	0.0023303	0.334767	0.007	1	96	0.933496	1	0.964003	62	18	0.0717524	0.147313	0.534946	0.657343	1	0.805117
19.7001	6.27159	6.38673	0.115144	0.572367	0.395319	0.588062	0.482111	0.18495	0.321104	0.576	1	96	0.449744	1	0.666706	62	18	0.0746839	0.113635	0.554659	0.485764	1	0.685274
19.7056	6.24703	6.00256	-0.244462	0.617966	0.550754	0.611798	0.597301	0.833675	0.370477	2.2503	1	96	0.13687	1	0.348798	62	18	0.0776985	0.140785	0.621864	0.118479	1	0.315501
19.7258	5.99281	6.22498	0.232175	0.476263	0.453447	0.492677	0.525103	0.75198	0.249924	3.0088	1	96	0.0860232	1	0.260617	62	18	0.0625701	0.123768	0.624552	0.110544	1	0.299416
19.7565	7.44245	7.78913	0.346678	1.31936	1.47086	1.26123	1.36503	1.67659	1.6501	1.0161	1	96	0.31598	1	0.534909	62	18	0.160176	0.32174	0.560036	0.443562	1	0.659086
19.7566	6.15303	6.36828	0.215244	0.561197	0.297919	0.573163	0.433915	0.646303	0.297952	2.1692	1	96	0.144071	1	0.355674	62	18	0.0727918	0.102275	0.644265	0.0644245	1	0.213547
19.781	6.98449	6.86006	-0.124429	0.79172	0.779072	0.77063	0.787644	0.21598	0.599649	0.3602	1	96	0.549809	1	0.751036	62	18	0.0978701	0.18565	0.542115	0.592126	1	0.756516
19.84	6.84305	6.76089	-0.0821672	0.521369	0.45369	0.528299	0.550399	0.0941828	0.284296	0.3313	1	96	0.566241	1	0.762495	62	18	0.0670941	0.12973	0.570789	0.365756	1	0.609958
19.852	5.91516	5.608	-0.307158	0.609508	0.606856	0.615616	0.639418	1.31613	0.385494	3.4141	1	96	0.0677208	1	0.221377	62	18	0.0781833	0.150712	0.638889	0.0750595	1	0.237188
19.886	8.29854	7.72535	-0.57319	1.0819	1.05164	1.07277	1.06493	4.58323	1.14718	3.9952	1	96	0.0484578	1	0.176845	62	18	0.136242	0.251006	0.663082	0.0365114	1	0.147918
19.996	5.78904	6.13437	0.345331	0.505975	0.502589	0.526144	0.584319	1.66358	0.290907	5.7186	1	96	0.0187355	1	0.0975894	62	18	0.0668204	0.137725	0.701613	0.00969229	1	0.0685693
19.1392 (1)	6.29229	6.24699	-0.0453069	0.455033	0.614324	0.484326	0.622918	0.0286354	0.268017	0.1068	1	96	0.744529	1	0.865638	62	18	0.0615095	0.146823	0.524194	0.760119	1	0.86402
19.1392 (2)	6.87946	6.77478	-0.104679	0.464541	0.535332	0.476624	0.619549	0.15286	0.261317	0.585	1	96	0.446235	1	0.666706	62	18	0.0605313	0.146029	0.561828	0.429974	1	0.651143
19.1392 (2)	6.59771	6.40224	-0.195469	0.461965	0.581557	0.497206	0.630551	0.533006	0.279989	1.9037	1	96	0.17087	1	0.394861	62	18	0.0631453	0.148622	0.606631	0.172153	1	0.396118
19.1783 (1)	7.52347	7.02308	-0.500389	0.664218	0.829313	0.683837	0.771478	3.49293	0.495431	7.0503	1	96	0.00927915	1	0.0637437	62	18	0.0868474	0.181839	0.666667	0.0325758	1	0.136645
19.1783 (2)	6.70126	6.4591	-0.242163	0.372324	0.48377	0.402204	0.553315	0.818071	0.193238	4.2335	1	96	0.0423448	1	0.163183	62	18	0.05108	0.130418	0.671147	0.0281721	1	0.127177
19.1783 (3)	6.06643	6.54327	0.476839	0.476538	0.9182	0.496516	0.835754	3.17189	0.345031	9.1931	1	96	0.00312348	1	0.0269187	62	18	0.0630575	0.196989	0.650538	0.0536214	1	0.191102
19.1800 (IPF7397)	7.21682	7.16363	-0.0531877	0.85566	1.26508	0.838687	1.13201	0.0394636	0.829383	0.0476	1	96	0.827756	1	0.901969	62	18	0.106513	0.266818	0.508961	0.912841	1	0.957271
19.1814 (1)	7.00283	6.81305	-0.189776	0.343927	0.732787	0.396532	0.733726	0.502407	0.240301	2.0907	1	96	0.151455	1	0.366719	62	18	0.0503596	0.172941	0.546595	0.552936	1	0.73415
19.1814 (2)	6.2855	6.22173	-0.0637707	0.31458	0.370883	0.38527	0.470528	0.0567304	0.164335	0.3452	1	96	0.558222	1	0.757537	62	18	0.0489294	0.110905	0.543907	0.576297	1	0.75252
19.1814 (3)	5.56746	5.92744	0.359984	0.484227	0.501379	0.513778	0.596047	1.80776	0.283867	6.3683	1	96	0.0132598	1	0.0810166	62	18	0.0652498	0.14049	0.69086	0.0143509	1	0.085029
19.1844	5.31616	6.8599	1.54374	0.826319	1.51	0.808858	1.30323	33.2448	0.881822	37.7001	1	96	1.85618e-08	8.79829e-06	1.46638e-06	62	18	0.102725	0.307174	0.792115	0.000176617	0.0837165	0.00761059
19.2669 (1)	5.93966	5.86947	-0.0701927	0.634625	0.784764	0.635556	0.755183	0.0687318	0.440191	0.1561	1	96	0.693649	1	0.836615	62	18	0.0807157	0.177998	0.518817	0.813282	1	0.894421
19.2669 (2)	5.0886	5.54672	0.458114	0.456816	0.668176	0.470501	0.681447	2.92766	0.274333	10.6719	1	96	0.00150931	0.715413	0.0154069	62	18	0.0597537	0.160619	0.699821	0.01036	1	0.0722155
19.3060 (IPF9278)	6.61309	6.64731	0.0342194	0.552586	0.454496	0.577537	0.504022	0.016335	0.31622	0.0517	1	96	0.820615	1	0.898317	62	18	0.0733473	0.118799	0.501792	0.986211	1	0.996725
19.3225 (1)	7.49874	7.47832	-0.0204222	0.324764	0.298364	0.413093	0.483166	0.00581809	0.184334	0.0316	1	96	0.859283	1	0.921493	62	18	0.0524629	0.113883	0.518817	0.813282	1	0.894421
19.3225 (2)	6.64707	6.6328	-0.0142768	0.48329	0.362739	0.496191	0.480784	0.00284338	0.242925	0.0117	1	96	0.914089	1	0.957233	62	18	0.0630164	0.113322	0.557348	0.464396	1	0.663024
19.323 (1)	6.87053	6.23897	-0.631567	0.541037	0.793276	0.535837	0.746617	5.56432	0.346036	16.0802	1	96	0.00012011	0.0569323	0.00316291	62	18	0.0680514	0.175979	0.736559	0.00239768	1	0.0264302
19.323 (2)	5.25358	6.23662	0.98304	0.47563	0.970622	0.492669	0.876747	13.4808	0.357356	37.7238	1	96	1.84007e-08	8.72191e-06	1.46638e-06	62	18	0.0625691	0.206651	0.822581	3.44221e-05	0.0163161	0.00233087
19.3298 (1)	7.00094	5.97056	-1.03038	0.870499	0.841495	0.850601	0.772268	14.8104	0.695815	21.285	1	96	1.22326e-05	0.00579824	0.00041416	62	18	0.108026	0.182025	0.81362	5.65341e-05	0.0267972	0.00297746
19.3298 (2)	6.12171	6.35083	0.229124	0.544663	0.895624	0.559583	0.821274	0.732343	0.391891	1.8687	1	96	0.174817	1	0.397409	62	18	0.0710671	0.193576	0.560932	0.436738	1	0.655107
19.3298 (3)	5.21406	5.92475	0.710691	0.385924	0.855934	0.423828	0.817575	7.04588	0.286163	24.6219	1	96	3.01604e-06	0.0014296	0.00014296	62	18	0.0538262	0.192704	0.769713	0.000535646	0.253896	0.010579
19.3628 (1)	6.20112	6.29062	0.0894972	0.51982	0.520685	0.52368	0.590595	0.111736	0.290492	0.3846	1	96	0.536621	1	0.745919	62	18	0.0665075	0.139205	0.544803	0.568458	1	0.746397
19.3628 (2)	6.52071	6.53611	0.0154034	0.990486	0.79169	0.948574	0.74704	0.00330986	0.825315	0.004	1	96	0.949702	1	0.97017	62	18	0.120469	0.176079	0.521505	0.786576	1	0.875204
19.3910 (IPF15494)	5.71939	5.91947	0.200082	0.520138	0.610415	0.538523	0.652982	0.558456	0.31973	1.7466	1	96	0.189446	1	0.419036	62	18	0.0683924	0.153909	0.592294	0.237614	1	0.47125
19.3988 (IPF9655)	8.15847	8.05555	-0.102918	0.749975	0.779561	0.787867	0.918655	0.147759	0.669378	0.2207	1	96	0.639572	1	0.805831	62	18	0.100059	0.216529	0.508065	0.921984	1	0.9626
19.3994 (IPF9647)	6.9699	7.01091	0.0410126	0.450021	0.418341	0.480109	0.521414	0.0234644	0.239521	0.098	1	96	0.754922	1	0.868375	62	18	0.0609739	0.122898	0.533154	0.67409	1	0.808908
19.4668 (IPF7409)	6.72459	6.51189	-0.212702	0.571806	0.539671	0.590885	0.576907	0.631127	0.345587	1.8262	1	96	0.179753	1	0.401901	62	18	0.0750425	0.135978	0.619176	0.126855	1	0.323275
19.4738 (IPF10645)	6.14622	6.3591	0.212883	0.617822	0.609364	0.622784	0.620397	0.632201	0.387214	1.6327	1	96	0.204411	1	0.426832	62	18	0.0790937	0.146229	0.609319	0.161548	1	0.379078
19.4893 (1) (IPF12282)	5.54787	5.79512	0.247244	0.513133	0.448587	0.52896	0.52444	0.852761	0.278761	3.0591	1	96	0.0834823	1	0.260617	62	18	0.067178	0.123612	0.654122	0.0481583	1	0.17974
19.4893 (2) (IPF12282)	6.98198	6.85035	-0.131633	0.559364	0.800423	0.565747	0.776101	0.241714	0.381589	0.6334	1	96	0.428074	1	0.652435	62	18	0.0718499	0.182929	0.569892	0.371894	1	0.609958
19.5095 (1)	7.9286	7.6891	-0.239499	1.20284	1.30963	1.15481	1.18249	0.800166	1.34768	0.5937	1	96	0.442884	1	0.666666	62	18	0.146661	0.278716	0.569892	0.371894	1	0.609958
19.5095 (2)	7.54008	7.69318	0.153095	1.33363	1.10061	1.27538	1.05801	0.326962	1.51604	0.2157	1	96	0.643388	1	0.805831	62	18	0.161973	0.249375	0.546595	0.552936	1	0.73415
19.517 (1)	6.91174	6.82042	-0.0913153	0.618222	0.808197	0.612899	0.764035	0.116322	0.421001	0.2763	1	96	0.600349	1	0.777671	62	18	0.0778383	0.180085	0.591398	0.242222	1	0.476403
19.517 (2)	5.93935	5.8887	-0.050644	0.514538	0.418293	0.535147	0.539266	0.0357791	0.287347	0.1245	1	96	0.724978	1	0.852703	62	18	0.0679638	0.127106	0.523297	0.768908	1	0.865707
19.5244 (1)	6.59639	6.20183	-0.394553	0.476072	0.909687	0.50706	0.83438	2.17163	0.352807	6.1553	1	96	0.0148415	1	0.0847575	62	18	0.0643967	0.196665	0.623656	0.113141	1	0.304709
19.5244 (2)	5.65916	6.24066	0.581501	0.549159	0.407026	0.569964	0.514986	4.71709	0.311858	15.1258	1	96	0.000185343	0.0878524	0.00352278	62	18	0.0723855	0.121383	0.806452	8.33161e-05	0.0394918	0.00394918
19.600 (1)	7.29701	6.8678	-0.429211	0.52475	0.854884	0.563698	0.84657	2.56989	0.404701	6.3501	1	96	0.0133878	1	0.0810166	62	18	0.0715897	0.199539	0.682796	0.0190443	1	0.0981195
19.600 (2)	6.10294	6.62321	0.520265	0.61823	0.628458	0.617682	0.63141	3.77593	0.385268	9.8008	1	96	0.00231156	1	0.0214237	62	18	0.0784457	0.148825	0.757168	0.000963536	0.456716	0.0142724
19.6070 (1)	6.36265	6.42535	0.0626989	0.688426	0.759835	0.688417	0.760889	0.0548396	0.49681	0.1104	1	96	0.740414	1	0.864424	62	18	0.087429	0.179343	0.551971	0.507653	1	0.699498
19.6070 (2)	5.92667	5.63961	-0.287055	0.93104	0.676852	0.901047	0.684018	1.14949	0.736911	1.5599	1	96	0.214717	1	0.435907	62	18	0.114433	0.161225	0.586022	0.271192	1	0.514181
19.682 (1)	7.07828	5.91772	-1.16056	0.54122	1.09314	0.561577	0.985041	18.7892	0.458111	41.0144	1	96	5.57188e-09	2.64107e-06	6.60268e-07	62	18	0.0713203	0.232176	0.775986	0.000395725	0.187574	0.00937869
19.682 (2)	4.82602	6.18441	1.35839	0.678051	1.13057	0.667434	1.0182	25.7408	0.574334	44.8185	1	96	1.45411e-09	6.89246e-07	2.29749e-07	62	18	0.0847642	0.239993	0.832437	1.96541e-05	0.00931605	0.00186321
19.6861 (1) (IPF9828)	7.31179	7.16138	-0.150407	0.46065	0.734932	0.512198	0.778943	0.315581	0.337409	0.9353	1	96	0.33592	1	0.564631	62	18	0.0650492	0.183599	0.568996	0.378097	1	0.613759
19.6861 (2) (IPF9828)	6.32062	6.09282	-0.2278	0.698396	0.850444	0.687407	0.81542	0.723906	0.514457	1.4071	1	96	0.238466	1	0.459483	62	18	0.0873007	0.192196	0.573477	0.347722	1	0.595019
19.7096 (1) (IPF553)	5.85441	6.20446	0.350053	0.501843	0.521592	0.516487	0.560626	1.70939	0.277121	6.1684	1	96	0.0147387	1	0.0847575	62	18	0.0655939	0.132141	0.665771	0.033524	1	0.136986
19.7096 (2) (IPF553)	6.449	6.35103	-0.0979698	0.443861	0.474706	0.463643	0.540029	0.133893	0.231674	0.5779	1	96	0.449	1	0.666706	62	18	0.0588827	0.127286	0.615591	0.13873	1	0.344283
19.7167 (IPF20175)	5.68954	6.13159	0.442049	0.858496	0.736251	0.837432	0.751537	2.72594	0.671546	4.0592	1	96	0.0467283	1	0.17469	62	18	0.106354	0.177139	0.689068	0.0152951	1	0.0852928
19.7214 (IPF885)	5.86915	5.87754	0.00838162	0.661591	0.910909	0.66392	0.851649	0.00098001	0.5028	0.0019	1	96	0.965323	1	0.975614	62	18	0.084318	0.200736	0.505376	0.949472	1	0.978369
19.7473 (1) (IPF2500)	5.3738	5.40858	0.0347797	0.468013	0.500904	0.493429	0.549849	0.0168743	0.256301	0.0658	1	96	0.798102	1	0.880099	62	18	0.0626656	0.129601	0.53853	0.624366	1	0.785012
19.7473 (2) (IPF2500)	6.34065	5.97577	-0.364876	0.559747	0.66606	0.573091	0.670769	1.85723	0.354913	5.2329	1	96	0.0243587	1	0.115794	62	18	0.0727826	0.158102	0.673835	0.0257842	1	0.118658
19.932 (2)	7.61245	7.51287	-0.0995852	0.486267	0.374131	0.528791	0.486476	0.138345	0.270257	0.5119	1	96	0.476054	1	0.687664	62	18	0.0671565	0.114664	0.587814	0.261283	1	0.501409
19.932 (3)	7.09681	6.95681	-0.139999	0.600055	0.500219	0.60232	0.5695	0.273416	0.354408	0.7715	1	96	0.381947	1	0.611631	62	18	0.0764948	0.134233	0.521505	0.786576	1	0.875204
19.936 (IPF9398)	6.184	5.95019	-0.233812	0.492977	0.531784	0.503549	0.575534	0.762616	0.270491	2.8194	1	96	0.0963833	1	0.273567	62	18	0.0639508	0.135655	0.629032	0.0982572	1	0.277226
ADH1	6.09882	6.09977	0.000949898	0.510762	0.78196	0.526963	0.76085	1.25872e-05	0.343336	0	1	96	1	1	1	62	18	0.0669243	0.179334	0.513441	0.867319	1	0.933507
ADP1 (1)	6.30492	6.06573	-0.239188	0.530164	0.393234	0.538184	0.487002	0.798094	0.278206	2.8687	1	96	0.0935602	1	0.268773	62	18	0.0683494	0.114787	0.647849	0.0580504	1	0.200846
ADP1 (2)	6.16048	5.86722	-0.293261	0.630791	0.767472	0.627487	0.746968	1.19973	0.429532	2.7931	1	96	0.0979278	1	0.276296	62	18	0.0796909	0.176062	0.611111	0.154757	1	0.372359
ALS1 (1)	6.12814	6.31447	0.186328	0.67478	0.670482	0.669883	0.685251	0.484316	0.453282	1.0685	1	96	0.303882	1	0.523781	62	18	0.0850752	0.161515	0.584229	0.281356	1	0.520949
ALS1 (2)	7.96677	7.35793	-0.608839	0.890932	0.845266	0.877313	0.795997	5.17105	0.740023	6.9877	1	96	0.00958598	1	0.0649108	62	18	0.111419	0.187618	0.678315	0.0221926	1	0.108446
ALS10 (2)	6.78358	6.71176	-0.0718216	0.645921	0.651967	0.645569	0.63303	0.0719589	0.413265	0.1741	1	96	0.677425	1	0.829714	62	18	0.0819873	0.149207	0.534946	0.657343	1	0.805117
ALS10 (3)	7.47375	7.09043	-0.383325	0.584309	0.325431	0.613985	0.487627	2.04978	0.34664	5.9133	1	96	0.0168813	1	0.0902873	62	18	0.0779762	0.114935	0.72491	0.00389946	1	0.0342286
ALS11	6.34473	6.63403	0.289296	0.685867	0.566586	0.695272	0.594511	1.1675	0.455078	2.5655	1	96	0.112504	1	0.306475	62	18	0.0882996	0.140128	0.629032	0.0982572	1	0.277226
ALS2	7.81772	7.24336	-0.574368	0.622276	0.567342	0.617152	0.602173	4.60208	0.376896	12.2105	1	96	0.000720739	0.34163	0.00899027	62	18	0.0783784	0.141933	0.78405	0.000265719	0.125951	0.00839673
ALS3 (1)	6.51899	6.50812	-0.010879	0.557774	0.849972	0.562533	0.779344	0.00165101	0.379852	0.0043	1	96	0.947853	1	0.97017	62	18	0.0714417	0.183693	0.508065	0.921984	1	0.9626
ALS3 (2)	8.43174	8.18807	-0.243665	0.831512	0.968445	0.844748	1.05312	0.828249	0.799788	1.0356	1	96	0.311405	1	0.530956	62	18	0.107283	0.248222	0.604839	0.179506	1	0.40711
ALS4	5.68098	6.02061	0.339631	0.65048	0.782218	0.656783	0.731454	1.60912	0.453957	3.5447	1	96	0.062764	1	0.210994	62	18	0.0834116	0.172405	0.620072	0.124013	1	0.321214
ALS5 (1)	5.61372	6.20066	0.586942	0.64036	0.541635	0.650735	0.613824	4.8058	0.413284	11.6283	1	96	0.000951456	0.45099	0.0109946	62	18	0.0826435	0.14468	0.759857	0.000851376	0.403552	0.0130178
ALS5 (2)	7.60883	7.43048	-0.17835	0.638459	0.783017	0.660509	0.744584	0.443731	0.462019	0.9604	1	96	0.329549	1	0.555895	62	18	0.0838847	0.1755	0.585125	0.276242	1	0.517545
ALS6 (1)	6.78302	6.22729	-0.555724	0.590081	0.87324	0.599118	0.806107	4.30816	0.422336	10.2008	1	96	0.00189922	0.900229	0.018372	62	18	0.0760881	0.190001	0.722222	0.00434975	1	0.0368175
ALS6 (2)	5.47702	6.15596	0.678937	0.44028	0.744811	0.464726	0.739487	6.43032	0.288083	22.321	1	96	7.88042e-06	0.00373532	0.000336697	62	18	0.0590203	0.174299	0.771505	0.000491567	0.233003	0.0105757
ALS6 (3)	5.8347	6.00132	0.166618	0.638857	0.787594	0.632256	0.742614	0.387276	0.432817	0.8948	1	96	0.346555	1	0.576375	62	18	0.0802966	0.175036	0.543011	0.584186	1	0.756516
ALS7 (1)	6.35562	6.11697	-0.238651	1.21437	1.26594	1.16345	1.11115	0.794515	1.32769	0.5984	1	96	0.44109	1	0.666666	62	18	0.147758	0.2619	0.546595	0.552936	1	0.73415
ALS7 (2)	6.29635	6.36702	0.0706686	0.40155	0.527135	0.440052	0.558552	0.0696671	0.219437	0.3175	1	96	0.574428	1	0.764527	62	18	0.0558867	0.131652	0.56362	0.416632	1	0.64118
ALS7(3)	6.31107	6.07479	-0.236286	0.546132	0.706443	0.553759	0.717568	0.778845	0.352038	2.2124	1	96	0.140183	1	0.350937	62	18	0.0703275	0.169133	0.590502	0.246893	1	0.481593
ALS8 (1)	6.42888	6.69724	0.268355	0.464793	0.60358	0.489774	0.595275	1.0046	0.264828	3.7934	1	96	0.0543764	1	0.18734	62	18	0.0622014	0.140308	0.636201	0.0808917	1	0.248978
ALS8 (2)	6.27918	6.07899	-0.200183	0.99683	0.828704	0.961802	0.80772	0.559019	0.865639	0.6458	1	96	0.423604	1	0.652435	62	18	0.122149	0.190382	0.547491	0.545253	1	0.730085
ALS9 (1)	5.13812	5.31098	0.172866	0.525007	0.672594	0.535522	0.676728	0.416864	0.324092	1.2863	1	96	0.259555	1	0.476857	62	18	0.0680114	0.159506	0.558244	0.457392	1	0.663008
ALS9 (2)	6.30657	7.04377	0.737202	0.669468	0.669398	0.663303	0.647206	7.58137	0.435373	17.4135	1	96	6.60599e-05	0.0313124	0.00195702	62	18	0.0842396	0.152548	0.785842	0.000242876	0.115123	0.0082231
ALS9 (3)	4.8053	4.76257	-0.0427303	0.587833	0.743837	0.584443	0.720632	0.0254711	0.380311	0.067	1	96	0.79631	1	0.880099	62	18	0.0742243	0.169855	0.547491	0.545253	1	0.730085
ARR3	5.75717	5.44192	-0.315245	0.692425	0.523111	0.696316	0.599052	1.38635	0.457397	3.0309	1	96	0.0848965	1	0.260617	62	18	0.0884323	0.141198	0.596774	0.215501	1	0.45806
ATC1 (1)	6.00196	5.74844	-0.25352	0.448954	0.808919	0.47194	0.76105	0.896598	0.300419	2.9845	1	96	0.0872811	1	0.260617	62	18	0.0599364	0.179381	0.61828	0.129747	1	0.328877
ATC1 (2)	5.29212	5.71036	0.418236	0.529274	0.423707	0.539136	0.536592	2.44015	0.290071	8.4122	1	96	0.00462063	1	0.0362233	62	18	0.0684704	0.126476	0.729391	0.00324219	1	0.0313632
AXL1 (1)	6.55419	5.9726	-0.581593	0.482205	0.684735	0.510462	0.665443	4.71859	0.300291	15.7134	1	96	0.000141817	0.0672213	0.00320101	62	18	0.0648287	0.156846	0.74552	0.00162612	0.770779	0.0197636
AXL1 (2)	5.69195	6.23596	0.54401	0.536122	0.572828	0.556449	0.627856	4.12846	0.328067	12.5842	1	96	0.000603787	0.286195	0.008177	62	18	0.0706691	0.147987	0.759857	0.000851376	0.403552	0.0130178
AXL2 (1)	6.97763	6.7832	-0.194432	0.551667	0.56925	0.561691	0.627397	0.527361	0.332525	1.5859	1	96	0.210966	1	0.433889	62	18	0.0713349	0.147879	0.596774	0.215501	1	0.45806
AXL2 (2)	6.16026	6.20495	0.0446884	0.611724	0.677716	0.610548	0.673004	0.0278589	0.390241	0.0714	1	96	0.789882	1	0.880099	62	18	0.0775397	0.158628	0.5	1	1	1
BGL2	7.31721	7.73353	0.416317	0.610425	0.597461	0.630395	0.829705	2.41781	0.460824	5.2467	1	96	0.0241765	1	0.115794	62	18	0.0800603	0.195563	0.704301	0.00876251	1	0.0638989
BIG1	6.85463	7.10556	0.250926	0.356242	0.291668	0.38948	0.511882	0.878347	0.175741	4.998	1	96	0.0276936	1	0.118259	62	18	0.049464	0.120652	0.706093	0.00818778	1	0.0625969
BMH1	6.33235	6.24533	-0.0870198	0.514635	0.546345	0.527811	0.581222	0.105636	0.291494	0.3624	1	96	0.548596	1	0.751036	62	18	0.067032	0.136995	0.551971	0.507653	1	0.699498
BUL1	5.83498	6.20009	0.365113	0.606139	0.495046	0.606412	0.611696	1.85964	0.369138	5.0378	1	96	0.0270962	1	0.11676	62	18	0.0770144	0.144178	0.687276	0.0162936	1	0.0887721
CAG1	7.07791	7.15845	0.0805394	0.368896	0.799853	0.419765	0.810866	0.090488	0.281102	0.3219	1	96	0.571792	1	0.764527	62	18	0.0533102	0.191123	0.586918	0.266206	1	0.508797
CAN1	6.33078	6.63531	0.304527	0.555635	0.592263	0.562199	0.602595	1.29368	0.326323	3.9644	1	96	0.0493144	1	0.17841	62	18	0.0713993	0.142033	0.65233	0.0508284	1	0.18252
CDC19	6.13398	6.77499	0.641007	0.573457	0.863612	0.582792	0.832044	5.73191	0.416506	13.7619	1	96	0.00034762	0.164772	0.00610266	62	18	0.0740147	0.196115	0.755376	0.00104575	0.495686	0.0150208
CDC24 (1)	7.97662	7.53069	-0.445921	0.346583	0.664514	0.426993	0.653905	2.7739	0.235779	11.7648	1	96	0.000891292	0.422472	0.0105618	62	18	0.0542282	0.154127	0.727599	0.00349193	1	0.0324544
CDC24 (2)	5.38763	5.4174	0.0297691	0.519653	0.473254	0.533848	0.558242	0.0123625	0.2908	0.0425	1	96	0.837106	1	0.907982	62	18	0.0677987	0.131579	0.536738	0.640766	1	0.797173
CDR1(1)	7.43709	6.44875	-0.988338	0.494624	1.18192	0.5286	1.03519	13.6265	0.452075	30.1422	1	96	3.27415e-07	0.000155195	1.93994e-05	62	18	0.0671322	0.243996	0.705197	0.00847079	1	0.0637326
CDR1(2)	6.60797	6.95304	0.345067	0.474968	1.07032	0.51299	0.941128	1.66104	0.398845	4.1646	1	96	0.0440226	1	0.16828	62	18	0.0651497	0.221826	0.579749	0.307885	1	0.554896
CDR1(2)	6.15305	6.22845	0.075403	0.583002	0.609194	0.59241	0.625215	0.0793143	0.359655	0.2205	1	96	0.639724	1	0.805831	62	18	0.0752361	0.147365	0.570789	0.365756	1	0.609958
CDR1(3)	5.42337	6.64536	1.22198	0.643404	0.785571	0.635414	0.72801	20.8308	0.431266	48.3014	1	96	4.39494e-10	2.0832e-07	1.0416e-07	62	18	0.0806976	0.171594	0.873656	1.59633e-06	0.000756662	0.000378331
CDR11 (1)	6.64107	5.99054	-0.650526	0.638505	0.922142	0.6311	0.841086	5.90343	0.465664	12.6774	1	96	0.000577788	0.273872	0.008177	62	18	0.0801498	0.198246	0.682796	0.0190443	1	0.0981195
CDR11 (2)	6.51011	6.17596	-0.334146	0.327562	0.313814	0.377721	0.513968	1.55756	0.169152	9.2081	1	96	0.00310024	1	0.0269187	62	18	0.0479706	0.121143	0.762545	0.000751428	0.356177	0.0130178
CDR11 (3.1)	5.90713	5.96377	0.0566414	0.540529	0.590408	0.551988	0.609134	0.044755	0.319152	0.1402	1	96	0.708908	1	0.846527	62	18	0.0701025	0.143574	0.532258	0.682525	1	0.814904
CDR11 (3.2)	5.79535	5.81544	0.020095	0.441126	0.79443	0.468794	0.733286	0.00563316	0.289063	0.0195	1	96	0.889235	1	0.940842	62	18	0.0595369	0.172837	0.524194	0.760119	1	0.86402
CDR2 (1)	5.29059	5.07894	-0.211656	0.499147	0.461962	0.51076	0.525356	0.624934	0.264172	2.3656	1	96	0.127326	1	0.329795	62	18	0.0648666	0.123828	0.604839	0.179506	1	0.40711
CDR2 (2)	4.7349	4.92582	0.190917	0.440668	0.60983	0.454505	0.617819	0.508466	0.244743	2.0775	1	96	0.152739	1	0.367504	62	18	0.0577222	0.145621	0.589606	0.251626	1	0.488815
CDR3	6.37075	6.27791	-0.0928467	0.447942	0.378368	0.474783	0.488912	0.120256	0.228386	0.5265	1	96	0.469847	1	0.681063	62	18	0.0602975	0.115238	0.574373	0.341838	1	0.591356
CDR4 (1)	7.85848	7.18717	-0.67132	0.337034	0.576554	0.382458	0.607076	6.28685	0.194717	32.2871	1	96	1.42288e-07	6.74445e-05	9.63493e-06	62	18	0.0485722	0.143089	0.862007	3.33548e-06	0.00158102	0.000527006
CDR4 (2)	6.82932	6.68646	-0.142852	0.312771	0.394834	0.36493	0.450449	0.284672	0.148372	1.9186	1	96	0.169221	1	0.394861	62	18	0.0463462	0.106172	0.609319	0.161548	1	0.379078
CDR4 (3)	6.33739	7.08998	0.752585	0.485524	0.745335	0.505523	0.70725	7.90106	0.308874	25.5802	1	96	2.03447e-06	0.000964341	0.000107149	62	18	0.0642014	0.1667	0.776882	0.000378785	0.179544	0.00937869
CEF3 (1)	3.37462	3.77112	0.396491	0.184655	0.651035	0.235485	0.663525	2.19301	0.139322	15.7406	1	96	0.000140077	0.0663966	0.00320101	62	18	0.0299066	0.156394	0.770609	0.000513166	0.243241	0.0105757
CEF3 (2)	6.58142	6.22356	-0.357867	0.674173	0.736989	0.675363	0.708098	1.78656	0.465986	3.8339	1	96	0.053129	1	0.186542	62	18	0.0857712	0.1669	0.630824	0.0936588	1	0.275741
CFL1	6.78641	6.46389	-0.322525	0.50471	0.497789	0.524939	0.57138	1.45111	0.286657	5.0622	1	96	0.0267368	1	0.116268	62	18	0.0666673	0.134675	0.68638	0.016814	1	0.0895488
CFL2	6.48939	6.03694	-0.452454	0.614383	0.704043	0.620141	0.687364	2.85576	0.403731	7.0734	1	96	0.00916853	1	0.0637437	62	18	0.078758	0.162013	0.688172	0.0157874	1	0.0870144
CFL4	6.2477	6.2279	-0.019805	0.447077	0.365903	0.466244	0.491782	0.0054717	0.222716	0.0246	1	96	0.875697	1	0.930674	62	18	0.059213	0.115914	0.519713	0.804354	1	0.890803
CFL5	6.48729	6.61867	0.131379	0.683172	0.554716	0.680543	0.586935	0.240784	0.43728	0.5506	1	96	0.459884	1	0.677865	62	18	0.086429	0.138342	0.581541	0.297081	1	0.541602
CHK1 (1)	6.4703	6.23652	-0.233777	0.385888	0.43789	0.408295	0.53582	0.762394	0.192945	3.9513	1	96	0.0496837	1	0.17841	62	18	0.0518535	0.126294	0.654122	0.0481583	1	0.17974
CHK1 (2)	5.99392	5.95112	-0.0428021	0.384367	0.363722	0.418947	0.490766	0.0255567	0.189756	0.1347	1	96	0.714416	1	0.848704	62	18	0.0532063	0.115675	0.53405	0.665695	1	0.807007
CHK1 (3)	5.41371	6.12941	0.715696	0.468339	0.796969	0.486111	0.7989	7.14548	0.323906	22.0604	1	96	8.79826e-06	0.00417038	0.000336697	62	18	0.0617362	0.188303	0.760753	0.000816766	0.387147	0.0130178
CHS1 (1)	6.71321	6.50525	-0.207955	0.633544	0.243053	0.632762	0.422302	0.603272	0.351993	1.7139	1	96	0.193605	1	0.419036	62	18	0.0803609	0.0995375	0.653226	0.0494782	1	0.18252
CHS1 (2)	6.02545	5.9697	-0.055752	0.580721	0.698134	0.589668	0.676458	0.0433606	0.371658	0.1167	1	96	0.733388	1	0.86046	62	18	0.074888	0.159443	0.523297	0.768908	1	0.865707
CHS2 (1)	8.61734	8.10404	-0.513304	0.415625	0.840963	0.52579	1.00003	3.67556	0.434164	8.4658	1	96	0.00449728	1	0.0361307	62	18	0.0667754	0.235709	0.74552	0.00162612	0.770779	0.0197636
CHS2 (2)	7.01504	6.93777	-0.077274	1.06484	0.684572	1.02066	0.685718	0.0832991	0.917178	0.0908	1	96	0.763814	1	0.870308	62	18	0.129624	0.161625	0.512545	0.876393	1	0.933507
CHS8 (1)	7.15258	6.57833	-0.574248	0.871509	0.556247	0.844481	0.608902	4.60016	0.638525	7.2044	1	96	0.00856667	1	0.060606	62	18	0.107249	0.14352	0.730287	0.00312353	1	0.0313632
CHS8 (2)	5.8372	6.43632	0.599126	0.538377	0.851278	0.547022	0.805302	5.00737	0.375358	13.3403	1	96	0.000423163	0.200579	0.00668598	62	18	0.0694719	0.189812	0.75	0.00133295	0.631819	0.018052
CHT1	5.24148	4.8879	-0.353578	0.849244	0.695499	0.82319	0.680647	1.744	0.630923	2.7642	1	96	0.0996567	1	0.27951	62	18	0.104545	0.16043	0.619176	0.126855	1	0.323275
CHT2	6.24743	6.36395	0.116521	0.538885	0.488544	0.543092	0.550712	0.189403	0.296765	0.6382	1	96	0.426335	1	0.652435	62	18	0.0689727	0.129804	0.554659	0.485764	1	0.685274
CNH1 (1)	6.81849	6.19124	-0.627249	1.03135	0.947773	0.993289	0.89261	5.4885	0.945242	5.8065	1	96	0.0178732	1	0.0941324	62	18	0.126148	0.21039	0.697133	0.0114385	1	0.0753033
CNH1 (2)	5.24926	5.41474	0.16548	0.482923	0.527395	0.499662	0.564492	0.382003	0.264698	1.4432	1	96	0.232578	1	0.45367	62	18	0.0634571	0.133052	0.59319	0.233067	1	0.47125
CNT	7.27804	7.04355	-0.234487	0.40837	0.536135	0.462203	0.562028	0.767029	0.235915	3.2513	1	96	0.0745041	1	0.240238	62	18	0.0586998	0.132471	0.654122	0.0481583	1	0.17974
CRH11	6.28376	6.61144	0.327686	1.10119	0.82232	1.05812	0.774657	1.49792	1.00639	1.4884	1	96	0.225453	1	0.447134	62	18	0.134382	0.182588	0.63172	0.0914253	1	0.272551
CRH12	6.603	6.56926	-0.033739	0.55172	0.477417	0.57269	0.540203	0.0158796	0.320094	0.0496	1	96	0.824234	1	0.9002	62	18	0.0727317	0.127327	0.503584	0.967833	1	0.988692
CRP1 (1)	6.5341	6.42566	-0.108436	0.571081	0.545405	0.587428	0.625525	0.16403	0.355143	0.4619	1	96	0.498373	1	0.703062	62	18	0.0746034	0.147438	0.540323	0.608151	1	0.770758
CRP1 (2)	7.58329	7.67244	0.0891491	0.406299	0.697456	0.475674	0.74675	0.110869	0.298487	0.3714	1	96	0.543682	1	0.751036	62	18	0.0604106	0.176011	0.501792	0.986211	1	0.996725
CSA1 (1)	7.29422	7.15814	-0.13608	1.53905	1.01954	1.45963	0.963167	0.258323	1.86835	0.1383	1	96	0.710797	1	0.846527	62	18	0.185373	0.227021	0.503584	0.967833	1	0.988692
CSA1 (2)	6.59878	6.9882	0.389423	1.23134	1.36048	1.17558	1.1616	2.11552	1.37487	1.5387	1	96	0.217835	1	0.435907	62	18	0.149299	0.273792	0.566308	0.397082	1	0.625305
CSC25	6.04767	6.51997	0.472295	0.628304	0.382544	0.635265	0.502664	3.11172	0.370675	8.3947	1	96	0.00466165	1	0.0362233	62	18	0.0806787	0.118479	0.736559	0.00239768	1	0.0264302
CSH1	3.36924	3.74728	0.378039	0.181414	0.578169	0.222824	0.615265	1.99364	0.121334	16.431	1	96	0.000102536	0.0486018	0.00285893	62	18	0.0282986	0.145019	0.775986	0.000395725	0.187574	0.00937869
CSP37	5.41041	5.81255	0.402138	0.629756	0.681917	0.6269	0.668043	2.25592	0.404615	5.5755	1	96	0.0202341	1	0.10425	62	18	0.0796164	0.157459	0.658602	0.0419942	1	0.165877
CWH41	9.29696	9.09004	-0.206914	0.907757	0.871699	0.908868	0.99738	0.597245	0.862815	0.6922	1	96	0.407482	1	0.641682	62	18	0.115426	0.235085	0.540323	0.608151	1	0.770758
CYC3	6.78229	6.15355	-0.628742	1.0677	0.54504	1.03013	0.591329	5.51467	0.906104	6.0861	1	96	0.015397	1	0.0853191	62	18	0.130827	0.139378	0.696237	0.0118195	1	0.0767457
CYR1 (1)	6.82231	6.39924	-0.423068	0.455273	0.595289	0.486352	0.613567	2.49686	0.267035	9.3503	1	96	0.00288862	1	0.0258341	62	18	0.0617667	0.144619	0.709677	0.00713849	1	0.0554696
CYR1 (2)	6.2322	6.31866	0.0864583	0.628837	0.352197	0.61956	0.476159	0.104277	0.349609	0.2983	1	96	0.586217	1	0.770291	62	18	0.0786842	0.112232	0.505376	0.949472	1	0.978369
CYR1 (3)	5.58711	5.60592	0.018811	0.693325	0.692017	0.692722	0.692719	0.00493626	0.479863	0.0103	1	96	0.919374	1	0.957765	62	18	0.0879758	0.163275	0.501792	0.986211	1	0.996725
DAL52	5.83463	6.06725	0.232623	0.49094	0.385685	0.506998	0.489123	0.754882	0.253166	2.9818	1	96	0.0874221	1	0.260617	62	18	0.0643888	0.115287	0.666667	0.0325758	1	0.136645
DFG5	6.65908	6.38503	-0.274046	0.653459	0.517845	0.639984	0.552352	1.04766	0.386807	2.7085	1	96	0.103085	1	0.284083	62	18	0.0812781	0.130191	0.59319	0.233067	1	0.47125
EBP1	5.87886	5.90735	0.028485	0.561836	0.501263	0.57763	0.586059	0.011319	0.335794	0.0337	1	96	0.854734	1	0.919843	62	18	0.0733591	0.138136	0.512545	0.876393	1	0.933507
ECE1	6.82504	7.74924	0.924205	1.57804	1.47209	1.4911	1.37219	11.9155	2.14917	5.5442	1	96	0.0205784	1	0.104884	62	18	0.18937	0.323428	0.691756	0.0138984	1	0.0833901
ECM331	5.21879	5.46505	0.246258	0.772598	0.892075	0.753289	0.843459	0.845969	0.598825	1.4127	1	96	0.237541	1	0.459483	62	18	0.0956679	0.198805	0.585125	0.276242	1	0.517545
EFG1	7.353	7.17393	-0.179071	0.642553	0.595047	0.646885	0.644152	0.447325	0.417691	1.0709	1	96	0.303342	1	0.523781	62	18	0.0821545	0.151828	0.557348	0.464396	1	0.663024
EFT2 (1)	7.81345	8.08355	0.270096	0.857257	1.22142	0.828244	1.20439	1.01768	0.852628	1.1936	1	96	0.277339	1	0.503927	62	18	0.105187	0.283879	0.531362	0.691	1	0.818835
EFT2 (2)	6.19456	6.3179	0.123346	0.540429	0.601237	0.541337	0.62289	0.212238	0.313739	0.6765	1	96	0.412833	1	0.644768	62	18	0.0687499	0.146817	0.548387	0.537624	1	0.726022
ENO1	5.50018	5.74305	0.242875	0.629759	0.505999	0.625981	0.547161	0.822889	0.371699	2.2139	1	96	0.14005	1	0.350937	62	18	0.0794997	0.128967	0.644265	0.0644245	1	0.213547
ERG25	5.66097	5.44974	-0.211233	0.765576	0.636845	0.757232	0.67007	0.622438	0.546286	1.1394	1	96	0.288456	1	0.516784	62	18	0.0961685	0.157937	0.571685	0.359681	1	0.604569
ERG7	6.50644	6.49206	-0.0143759	0.446604	0.553956	0.473264	0.587586	0.00288299	0.250411	0.0115	1	96	0.914824	1	0.957233	62	18	0.0601045	0.138495	0.545699	0.560671	1	0.740273
EXG2	5.79587	5.95403	0.158157	0.691336	0.480364	0.679285	0.542417	0.348942	0.424985	0.8211	1	96	0.367127	1	0.591899	62	18	0.0862693	0.127849	0.613799	0.14498	1	0.35792
FCY21	7.37495	7.29568	-0.0792655	0.297602	0.352708	0.378417	0.4874	0.0876482	0.163765	0.5352	1	96	0.466211	1	0.677865	62	18	0.0480591	0.114881	0.5681	0.384362	1	0.617585
FET3	5.56341	5.64867	0.085257	0.672464	0.706484	0.67028	0.70535	0.101399	0.45979	0.2205	1	96	0.639724	1	0.805831	62	18	0.0851257	0.166253	0.512545	0.876393	1	0.933507
FET33	6.08225	5.77033	-0.311923	0.705153	0.511026	0.695401	0.558849	1.35728	0.446254	3.0415	1	96	0.0843618	1	0.260617	62	18	0.088316	0.131722	0.626344	0.105491	1	0.289033
FET35	7.43061	7.28211	-0.1485	0.819832	0.764119	0.800169	0.747546	0.30763	0.62252	0.4942	1	96	0.483761	1	0.688597	62	18	0.101622	0.176198	0.551075	0.515062	1	0.701551
FET99	5.76749	6.08536	0.317871	0.704276	0.806744	0.702232	0.798115	1.40954	0.524484	2.6875	1	96	0.104412	1	0.286076	62	18	0.0891836	0.188118	0.603943	0.18327	1	0.413666
FGR2	6.50073	6.06424	-0.436491	0.684116	0.527142	0.68087	0.573089	2.65781	0.434128	6.1222	1	96	0.0151045	1	0.0852326	62	18	0.0864706	0.135078	0.689068	0.0152951	1	0.0852928
FGR28	6.28201	6.52117	0.23916	0.655505	0.563782	0.663392	0.59217	0.797904	0.420599	1.8971	1	96	0.171606	1	0.394861	62	18	0.0842509	0.139576	0.626344	0.105491	1	0.289033
FGR38	5.75956	5.46845	-0.291108	0.722349	0.581393	0.71985	0.64078	1.18218	0.494736	2.3895	1	96	0.125443	1	0.328508	62	18	0.091421	0.151033	0.609319	0.161548	1	0.379078
FLC1 (1) (IPF4012)	6.69908	6.47238	-0.226696	0.405179	0.494766	0.428818	0.555025	0.716904	0.210947	3.3985	1	96	0.0683408	1	0.221873	62	18	0.05446	0.130821	0.637097	0.0789081	1	0.246069
FLC1 (2) (IPF4012)	6.08345	6.17503	0.0915786	0.478877	0.731052	0.502509	0.742884	0.116994	0.317761	0.3682	1	96	0.545419	1	0.751036	62	18	0.0638187	0.1751	0.574373	0.341838	1	0.591356
FRE10	7.84695	7.47703	-0.369918	0.38536	0.392622	0.418743	0.517255	1.9089	0.195442	9.7671	1	96	0.00235028	1	0.0214237	62	18	0.0531804	0.121918	0.767921	0.000583386	0.276525	0.011061
FTR1	7.1719	7.06703	-0.104861	0.355996	0.373383	0.401303	0.480457	0.153392	0.176256	0.8703	1	96	0.353213	1	0.583037	62	18	0.0509655	0.113245	0.571685	0.359681	1	0.604569
FTR2	6.01966	6.37015	0.350497	0.557901	0.555622	0.573404	0.552397	1.71373	0.323638	5.2952	1	96	0.0235474	1	0.115067	62	18	0.0728223	0.130201	0.698029	0.0110684	1	0.0753033
GAP1	5.88452	5.89389	0.00937676	0.6583	0.72554	0.661407	0.723867	0.00122653	0.456317	0.0027	1	96	0.958667	1	0.975125	62	18	0.0839987	0.170617	0.521505	0.786576	1	0.875204
GCA1 (1)	7.84451	7.49405	-0.35046	0.474469	0.834866	0.493466	0.800707	1.71337	0.33017	5.1893	1	96	0.0249441	1	0.116268	62	18	0.0626703	0.188728	0.629032	0.0982572	1	0.277226
GCA1 (2)	6.81297	6.85514	0.0421654	0.511106	0.503867	0.539506	0.593035	0.024802	0.30428	0.0815	1	96	0.77589	1	0.879837	62	18	0.0685174	0.13978	0.517921	0.822234	1	0.898016
GPH1 (1)	5.92077	5.72432	-0.196446	0.488175	0.62278	0.50928	0.631179	0.538342	0.289665	1.8585	1	96	0.175987	1	0.397409	62	18	0.0646786	0.14877	0.594982	0.224161	1	0.466019
GPH1 (2)	5.26544	5.76904	0.503605	0.505548	0.404797	0.524399	0.500105	3.53797	0.26957	13.1245	1	96	0.000468175	0.221915	0.00693484	62	18	0.0665987	0.117876	0.775986	0.000395725	0.187574	0.00937869
GPR1 (1)	6.3348	6.47505	0.140245	0.678469	0.908599	0.672514	0.831749	0.274379	0.50448	0.5439	1	96	0.46262	1	0.677865	62	18	0.0854093	0.196045	0.552867	0.500299	1	0.695431
GPR1 (2)	5.46929	5.71959	0.250303	0.332303	0.451084	0.374542	0.536217	0.873987	0.172374	5.0703	1	96	0.0266186	1	0.116268	62	18	0.0475669	0.126388	0.691756	0.0138984	1	0.0833901
GSC1 (1) (FKS1)	6.05024	5.72243	-0.327806	0.648669	0.642526	0.652115	0.659987	1.49902	0.427505	3.5064	1	96	0.0641756	1	0.21422	62	18	0.0828187	0.155561	0.644265	0.0644245	1	0.213547
GSC1 (2) (FKS1)	4.96542	4.97089	0.00546262	0.525761	0.585231	0.53006	0.603161	0.000416272	0.299018	0.0014	1	96	0.970231	1	0.97641	62	18	0.0673176	0.142166	0.512545	0.876393	1	0.933507
GSL2 (1)	7.19663	6.58691	-0.609717	0.393675	0.544925	0.445083	0.611057	5.18598	0.236304	21.9462	1	96	9.23431e-06	0.00437706	0.000336697	62	18	0.0565256	0.144028	0.822581	3.44221e-05	0.0163161	0.00233087
GSL2 (2)	6.48386	6.556	0.0721433	0.437628	0.41269	0.472277	0.504275	0.072605	0.229856	0.3159	1	96	0.575392	1	0.764527	62	18	0.0599793	0.118859	0.527778	0.72528	1	0.850947
GSL2 (3)	5.82247	6.01697	0.194503	0.394816	0.538072	0.427312	0.578185	0.527747	0.215659	2.4471	1	96	0.121033	1	0.3205	62	18	0.0542687	0.136279	0.634409	0.0849804	1	0.256565
HEM13	6.48082	6.64265	0.161827	0.429209	0.46572	0.450705	0.513403	0.36532	0.216309	1.6889	1	96	0.196858	1	0.422559	62	18	0.0572396	0.12101	0.580645	0.302451	1	0.549279
HEX1	6.0969	6.03641	-0.0604892	0.485145	0.797358	0.504086	0.750381	0.0510423	0.321442	0.1588	1	96	0.691149	1	0.835726	62	18	0.064019	0.176866	0.581541	0.297081	1	0.541602
HGT1	6.94575	6.7961	-0.149658	0.47639	0.522266	0.501819	0.609331	0.312446	0.277859	1.1245	1	96	0.291612	1	0.517694	62	18	0.0637311	0.143621	0.577957	0.318946	1	0.568348
HGT10	6.71887	6.32608	-0.392792	0.575884	0.544056	0.584589	0.571874	2.15228	0.338539	6.3576	1	96	0.0133349	1	0.0810166	62	18	0.0742429	0.134792	0.710573	0.00689579	1	0.0544768
HGT12	5.61578	5.62965	0.0138707	0.709333	0.696392	0.708815	0.691324	0.00268394	0.497081	0.0054	1	96	0.941573	1	0.968868	62	18	0.0900196	0.162947	0.524194	0.760119	1	0.86402
HGT13	6.41899	5.94274	-0.476252	0.632119	0.68595	0.633368	0.674249	3.16409	0.412806	7.6648	1	96	0.00675824	1	0.0492832	62	18	0.0804378	0.158922	0.694444	0.0126154	1	0.0786804
HGT14	6.58037	6.37106	-0.20931	0.427091	0.587594	0.471314	0.568853	0.61116	0.244249	2.5022	1	96	0.116977	1	0.316839	62	18	0.059857	0.13408	0.577957	0.318946	1	0.568348
HGT15	6.53292	6.85714	0.324227	0.624606	0.404433	0.633226	0.55141	1.46647	0.379851	3.8606	1	96	0.0523234	1	0.185084	62	18	0.0804198	0.129969	0.677419	0.022874	1	0.110635
HGT16	6.99349	6.67622	-0.317269	0.380241	0.540868	0.424997	0.539757	1.4042	0.204753	6.8581	1	96	0.0102553	1	0.0684652	62	18	0.0539746	0.127222	0.670251	0.0290094	1	0.128509
HGT17	5.91652	6.08245	0.165926	0.619913	0.840078	0.62555	0.823405	0.384062	0.453795	0.8463	1	96	0.359907	1	0.58624	62	18	0.0794449	0.194078	0.564516	0.410053	1	0.639359
HGT2	6.50591	6.13868	-0.367233	0.614277	0.512501	0.613525	0.588306	1.8813	0.369807	5.0872	1	96	0.0263737	1	0.116268	62	18	0.0779177	0.138665	0.689964	0.0148164	1	0.0852928
HGT20	6.50598	6.56008	0.0540981	0.52284	0.642333	0.540011	0.631876	0.0408261	0.315076	0.1296	1	96	0.719638	1	0.852703	62	18	0.0685815	0.148935	0.5	1	1	1
HGT3	6.62707	6.72815	0.10108	0.631514	0.441973	0.630764	0.521191	0.14253	0.370353	0.3848	1	96	0.536515	1	0.745919	62	18	0.0801071	0.122846	0.551075	0.515062	1	0.701551
HGT6	6.16485	6.0143	-0.150551	0.616609	0.596266	0.612798	0.617406	0.316185	0.376757	0.8392	1	96	0.361921	1	0.587502	62	18	0.0778254	0.145524	0.558244	0.457392	1	0.663008
HGT7	6.98092	6.96051	-0.0204141	0.995122	0.54527	0.958376	0.595618	0.00581349	0.795622	0.0073	1	96	0.93209	1	0.964003	62	18	0.121714	0.140388	0.542115	0.592126	1	0.756516
HGT8	3.41772	3.79712	0.379405	0.29706	0.691612	0.320756	0.688178	2.00807	0.183679	10.9325	1	96	0.00133011	0.630473	0.0143289	62	18	0.0407361	0.162205	0.743728	0.00175918	0.83385	0.0208463
HGT9	5.72589	5.52026	-0.205628	0.678244	0.515798	0.678599	0.583462	0.589847	0.434328	1.3581	1	96	0.246754	1	0.466701	62	18	0.0861822	0.137523	0.599462	0.202966	1	0.445398
HIS1	6.32936	6.54089	0.211537	0.518166	0.367732	0.52991	0.490003	0.624234	0.271934	2.2955	1	96	0.133035	1	0.340858	62	18	0.0672986	0.115495	0.624552	0.110544	1	0.299416
HSP70 (SSA1)	5.65351	6.13322	0.479715	0.649921	0.863454	0.658246	0.823288	3.21027	0.486579	6.5976	1	96	0.0117526	1	0.0763117	62	18	0.0835973	0.194051	0.668459	0.0307482	1	0.133712
HSP90	6.5761	6.80474	0.228634	0.582619	1.00151	0.590418	0.917693	0.729215	0.456166	1.5986	1	96	0.209163	1	0.43294	62	18	0.0749832	0.216302	0.542115	0.592126	1	0.756516
HST6 (1)	5.6984	5.47243	-0.225971	0.673664	0.525565	0.674182	0.617688	0.712325	0.438615	1.624	1	96	0.205611	1	0.427455	62	18	0.0856212	0.14559	0.607527	0.168561	1	0.391657
HWP1	8.37189	8.55245	0.180566	1.28772	1.42458	1.24624	1.33863	0.454829	1.60517	0.2834	1	96	0.595711	1	0.775734	62	18	0.158273	0.315519	0.524194	0.760119	1	0.86402
HYR1 (1.1)	7.15179	7.02806	-0.123726	0.78822	0.716459	0.771975	0.673928	0.213549	0.565047	0.3779	1	96	0.540184	1	0.748676	62	18	0.0980409	0.158846	0.533154	0.67409	1	0.808908
HYR1 (1.2)	7.14093	7.57788	0.436948	0.612926	0.820963	0.615219	0.766628	2.66338	0.424095	6.2802	1	96	0.0138915	1	0.0814069	62	18	0.0781329	0.180696	0.695341	0.0122117	1	0.078221
HYR1 (2)	6.35513	6.87316	0.518023	0.762893	0.914422	0.765832	0.8861	3.74346	0.6298	5.9439	1	96	0.0166079	1	0.0902873	62	18	0.0972608	0.208856	0.673835	0.0257842	1	0.118658
HYR3 (1)	6.29406	6.5753	0.281237	0.969394	0.928093	0.934957	0.850409	1.10336	0.841246	1.3116	1	96	0.254952	1	0.476857	62	18	0.11874	0.200443	0.569892	0.371894	1	0.609958
HYR3 (2)	7.34045	7.52458	0.184134	1.01258	1.05755	0.973321	0.929485	0.472981	0.929174	0.509	1	96	0.477303	1	0.687664	62	18	0.123612	0.219082	0.585125	0.276242	1	0.517545
IFF3 (1)	5.97362	6.15317	0.179556	0.44042	0.467344	0.466526	0.516385	0.449754	0.228327	1.9698	1	96	0.163696	1	0.385511	62	18	0.0592488	0.121713	0.602151	0.190971	1	0.426983
IFF3 (2)	5.61308	5.69732	0.0842434	0.610368	0.624064	0.619286	0.641684	0.0990025	0.389671	0.2541	1	96	0.615358	1	0.788323	62	18	0.0786494	0.151246	0.542115	0.592126	1	0.756516
IFF4 (1)	6.23069	5.91663	-0.314062	0.442091	0.6834	0.458899	0.698952	1.37596	0.271166	5.0742	1	96	0.0265618	1	0.116268	62	18	0.0582802	0.164745	0.655018	0.046868	1	0.17974
IFF4 (2)	7.33887	7.09245	-0.246418	0.630008	0.754078	0.647474	0.746277	0.847069	0.449236	1.8856	1	96	0.172898	1	0.395911	62	18	0.0822293	0.175899	0.594982	0.224161	1	0.466019
IFF5 (1)	6.44725	6.54616	0.0989063	0.92857	0.66476	0.892634	0.662331	0.136465	0.718745	0.1899	1	96	0.663978	1	0.817469	62	18	0.113365	0.156113	0.532258	0.682525	1	0.814904
IFF5 (2)	5.74501	6.09987	0.354863	0.678155	0.608397	0.682502	0.664838	1.75669	0.460622	3.8137	1	96	0.0537472	1	0.187325	62	18	0.0866779	0.156704	0.638889	0.0750595	1	0.237188
IFF6 (1)	6.94283	6.43388	-0.50895	0.538438	0.782688	0.545253	0.770142	3.61346	0.361774	9.9882	1	96	0.00210794	0.999164	0.0199833	62	18	0.0692472	0.181524	0.691756	0.0138984	1	0.0833901
IFF7 (1)	5.24648	5.49793	0.251443	0.454917	0.799499	0.475902	0.780311	0.881972	0.309827	2.8467	1	96	0.0948085	1	0.270718	62	18	0.0604396	0.183921	0.596774	0.215501	1	0.45806
IFF7 (2)	5.1644	5.65855	0.494157	0.50958	0.658406	0.525031	0.683617	3.40646	0.317433	10.7313	1	96	0.00146638	0.695066	0.0154069	62	18	0.066679	0.16113	0.730287	0.00312353	1	0.0313632
IFF8	5.96415	6.12427	0.160115	0.841502	0.776947	0.821561	0.796461	0.357634	0.666112	0.5369	1	96	0.465506	1	0.677865	62	18	0.104338	0.187728	0.574373	0.341838	1	0.591356
INT1 (1)	9.07172	9.16706	0.0953329	0.963835	1.13151	0.964732	1.15056	0.126783	1.01638	0.1247	1	96	0.724766	1	0.852703	62	18	0.122521	0.271189	0.537634	0.632543	1	0.793189
INT1 (2)	8.15472	7.71183	-0.442893	1.07098	1.01705	1.06208	1.03454	2.73635	1.11542	2.4532	1	96	0.120576	1	0.3205	62	18	0.134884	0.243843	0.617384	0.13269	1	0.332777
INT1 (3)	6.04877	5.85471	-0.194063	0.550296	0.630207	0.569252	0.629539	0.525363	0.339799	1.5461	1	96	0.21674	1	0.435907	62	18	0.072295	0.148384	0.603047	0.187091	1	0.42029
JEN1	6.65299	6.8303	0.177307	0.37098	0.554156	0.402485	0.610173	0.438557	0.207832	2.1101	1	96	0.149591	1	0.365494	62	18	0.0511156	0.143819	0.591398	0.242222	1	0.476403
KOG1 (1) (IPF4893)	6.01162	5.98844	-0.0231804	0.429815	0.600612	0.450804	0.625462	0.00749579	0.244194	0.0307	1	96	0.86128	1	0.921551	62	18	0.0572521	0.147423	0.524194	0.760119	1	0.86402
KOG1 (2) (IPF4893)	6.17219	6.52459	0.352406	0.472922	0.52895	0.487855	0.588293	1.73245	0.26156	6.6235	1	96	0.011594	1	0.0763117	62	18	0.0619577	0.138662	0.694444	0.0126154	1	0.0786804
KRE6	6.78511	6.73873	-0.0463788	0.661955	0.615305	0.660308	0.632927	0.0300064	0.428289	0.0701	1	96	0.791759	1	0.880099	62	18	0.0838592	0.149182	0.516129	0.840206	1	0.913435
KRE9	6.05887	6.10436	0.0454811	0.571251	0.68438	0.58255	0.711889	0.028856	0.375854	0.0768	1	96	0.782278	1	0.880099	62	18	0.0739839	0.167794	0.560036	0.443562	1	0.659086
LEU2	5.86646	6.07309	0.206635	0.546045	0.526987	0.565126	0.590704	0.595639	0.325811	1.8282	1	96	0.179517	1	0.401901	62	18	0.071771	0.13923	0.609319	0.161548	1	0.379078
LIP1	6.20439	6.114	-0.0903866	0.489835	0.433639	0.496538	0.561676	0.113968	0.261573	0.4357	1	96	0.510786	1	0.716309	62	18	0.0630604	0.132388	0.566308	0.397082	1	0.625305
LIP10	6.04949	6.03409	-0.0154023	0.628349	0.452236	0.635654	0.524463	0.00330936	0.375942	0.0088	1	96	0.925457	1	0.961988	62	18	0.0807282	0.123617	0.505376	0.949472	1	0.978369
LIP2	5.79962	5.94127	0.141655	0.53992	0.599418	0.547619	0.614914	0.279921	0.316938	0.8832	1	96	0.349685	1	0.579548	62	18	0.0695477	0.144937	0.562724	0.423272	1	0.647197
LIP3	6.3555	6.32142	-0.0340852	0.809993	0.659473	0.802118	0.652727	0.0162071	0.596024	0.0272	1	96	0.86935	1	0.927022	62	18	0.101869	0.153849	0.512545	0.876393	1	0.933507
LIP4	6.61461	6.05593	-0.558681	0.539373	0.697245	0.557686	0.685599	4.35413	0.345674	12.596	1	96	0.00060043	0.284604	0.008177	62	18	0.0708262	0.161597	0.739247	0.0021368	1	0.0247035
LIP5	6.57586	6.27392	-0.301935	0.79505	0.779331	0.777466	0.729278	1.27175	0.588629	2.1605	1	96	0.144868	1	0.355791	62	18	0.0987383	0.171892	0.606631	0.172153	1	0.396118
LIP6	6.20537	6.46271	0.257349	0.394889	0.485429	0.418542	0.562066	0.923888	0.205852	4.4881	1	96	0.0367136	1	0.144166	62	18	0.0531549	0.13248	0.675627	0.0242914	1	0.114001
LIP7	6.08489	6.02385	-0.0610448	0.391555	0.380815	0.430473	0.479709	0.0519843	0.195074	0.2665	1	96	0.606876	1	0.781683	62	18	0.0546702	0.113068	0.552867	0.500299	1	0.695431
LIP8	6.14743	6.37695	0.229527	0.471079	0.602816	0.499704	0.578884	0.734923	0.268317	2.739	1	96	0.101192	1	0.282137	62	18	0.0634624	0.136444	0.59319	0.233067	1	0.47125
LPD1	5.84544	6.03289	0.18745	0.552506	0.549675	0.557394	0.589547	0.49017	0.318725	1.5379	1	96	0.217953	1	0.435907	62	18	0.0707891	0.138958	0.612007	0.151444	1	0.368125
MDR1 (BMR1)	6.39244	6.06837	-0.324075	1.03068	0.747994	0.986035	0.722206	1.46509	0.874039	1.6762	1	96	0.198536	1	0.4239	62	18	0.125227	0.170226	0.571685	0.359681	1	0.604569
MEP3	6.53511	6.46119	-0.0739288	0.582504	0.497821	0.597303	0.580698	0.0762433	0.352508	0.2163	1	96	0.642927	1	0.805831	62	18	0.0758576	0.136872	0.536738	0.640766	1	0.797173
MID1	5.48474	5.67269	0.187949	0.535771	0.793914	0.542999	0.767946	0.492783	0.35912	1.3722	1	96	0.244333	1	0.466701	62	18	0.068961	0.181007	0.547491	0.545253	1	0.730085
MNN9	6.89024	6.94514	0.0549022	0.473972	0.490006	0.491408	0.551945	0.0420488	0.255247	0.1647	1	96	0.685769	1	0.835726	62	18	0.0624088	0.130095	0.531362	0.691	1	0.818835
MNT1	6.52438	6.4659	-0.0584723	0.619096	0.585178	0.617286	0.598219	0.0476952	0.375991	0.1269	1	96	0.72245	1	0.852703	62	18	0.0783954	0.141002	0.556452	0.47146	1	0.671087
MNT2	6.72073	6.35684	-0.36389	1.223	1.21868	1.16949	1.0512	1.8472	1.31045	1.4096	1	96	0.238052	1	0.459483	62	18	0.148525	0.24777	0.572581	0.353669	1	0.600857
MPD1	6.54911	6.57219	0.0230882	0.602794	0.586728	0.613977	0.610347	0.00743624	0.375999	0.0198	1	96	0.888392	1	0.940842	62	18	0.0779752	0.14386	0.517921	0.822234	1	0.898016
MSB2	5.68106	6.01608	0.335027	0.876494	0.568747	0.854899	0.588231	1.56579	0.646978	2.4202	1	96	0.12307	1	0.324085	62	18	0.108572	0.138647	0.639785	0.0731935	1	0.236012
MSS4	6.68597	6.70478	0.0188143	0.729022	0.536757	0.711069	0.555087	0.004938	0.462575	0.0107	1	96	0.917829	1	0.957765	62	18	0.0903059	0.130835	0.548387	0.537624	1	0.726022
NIK1 (1)	7.30403	6.49749	-0.806536	0.924764	1.11583	0.907644	0.976988	9.07448	0.852301	10.647	1	96	0.00152769	0.724124	0.0154069	62	18	0.115271	0.230278	0.717742	0.00520591	1	0.0425448
NIK1 (2)	5.78141	6.48459	0.703174	0.683141	0.909417	0.680872	0.828227	6.89762	0.512053	13.4705	1	96	0.000398183	0.188739	0.00650823	62	18	0.0864708	0.195215	0.722222	0.00434975	1	0.0368175
PCT1	6.09658	6.14773	0.0511544	0.614706	0.511601	0.61436	0.563695	0.036504	0.36443	0.1002	1	96	0.752277	1	0.868375	62	18	0.0780239	0.132864	0.542115	0.592126	1	0.756516
PDC11	6.11147	6.07892	-0.0325511	0.490231	0.358188	0.506063	0.533606	0.014781	0.262341	0.0563	1	96	0.812948	1	0.891985	62	18	0.0642701	0.125772	0.543011	0.584186	1	0.756516
PGA12	6.45274	6.47958	0.0268352	0.46068	0.580565	0.477686	0.631901	0.0100458	0.265478	0.0378	1	96	0.846256	1	0.915469	62	18	0.0606661	0.148941	0.526882	0.73394	1	0.85476
PGA13	9.30166	8.89886	-0.4028	0.444208	0.955994	0.515092	1.03786	2.26336	0.442256	5.1178	1	96	0.0259363	1	0.116268	62	18	0.0654168	0.244625	0.636201	0.0808917	1	0.248978
PGA18	6.36151	6.38266	0.0211452	0.57613	0.473584	0.598001	0.514397	0.0062373	0.337336	0.0185	1	96	0.892094	1	0.941766	62	18	0.0759462	0.121244	0.519713	0.804354	1	0.890803
PGA21	6.27931	6.41821	0.138904	0.574742	0.855698	0.586621	0.799114	0.269154	0.408301	0.6592	1	96	0.418851	1	0.650936	62	18	0.074501	0.188353	0.517921	0.822234	1	0.898016
PGA27	6.47362	6.4521	-0.0215118	0.462114	0.488737	0.472177	0.553781	0.00645547	0.241199	0.0268	1	96	0.870306	1	0.927022	62	18	0.0599666	0.130527	0.53405	0.665695	1	0.807007
PGA29	5.79369	5.86845	0.0747609	0.527403	0.612176	0.540974	0.643379	0.0779692	0.319086	0.2444	1	96	0.622176	1	0.792772	62	18	0.0687037	0.151646	0.539427	0.616235	1	0.778921
PGA3	6.43536	6.25898	-0.176375	0.670825	0.539136	0.664109	0.564244	0.433958	0.414305	1.0474	1	96	0.308679	1	0.528759	62	18	0.0843419	0.132994	0.578853	0.313384	1	0.562666
PGA30	6.34307	6.32661	-0.0164551	0.696755	0.565976	0.697766	0.597695	0.00377723	0.458623	0.0082	1	96	0.928036	1	0.962558	62	18	0.0886164	0.140878	0.508961	0.912841	1	0.957271
PGA31	7.01476	6.78032	-0.234436	1.0176	0.998984	0.976625	0.918429	0.766693	0.929761	0.8246	1	96	0.366113	1	0.591899	62	18	0.124032	0.216476	0.517025	0.831209	1	0.905731
PGA32	7.19284	7.14199	-0.0508471	0.737707	0.722063	0.724567	0.766963	0.0360668	0.538779	0.0669	1	96	0.796459	1	0.880099	62	18	0.0920201	0.180775	0.512545	0.876393	1	0.933507
PGA36	5.34296	5.4619	0.118941	0.986129	1.12936	0.95531	1.0088	0.19735	0.935515	0.211	1	96	0.647023	1	0.805831	62	18	0.121324	0.237777	0.507168	0.931138	1	0.970021
PGA38	6.27042	5.82614	-0.444277	0.558037	0.524122	0.569051	0.554568	2.75348	0.320272	8.5973	1	96	0.00420892	1	0.034397	62	18	0.0722695	0.130713	0.726703	0.00362325	1	0.0330273
PGA39	6.78429	7.1778	0.393515	0.58231	0.548929	0.593949	0.604512	2.16022	0.355535	6.076	1	96	0.0154798	1	0.0853191	62	18	0.0754316	0.142485	0.710573	0.00689579	1	0.0544768
PGA4	6.44505	6.61302	0.167967	0.583834	0.659988	0.588366	0.652755	0.393571	0.363591	1.0825	1	96	0.300752	1	0.523781	62	18	0.0747225	0.153856	0.5681	0.384362	1	0.617585
PGA40 (1)	6.71333	6.54698	-0.166359	0.495527	0.35987	0.515465	0.492069	0.38607	0.260566	1.4817	1	96	0.226493	1	0.447323	62	18	0.0654641	0.115982	0.596774	0.215501	1	0.45806
PGA40 (2)	5.34595	5.6062	0.260244	0.776374	0.602264	0.76681	0.6402	0.944792	0.549172	1.7204	1	96	0.19277	1	0.419036	62	18	0.097385	0.150897	0.630824	0.0936588	1	0.275741
PGA44	3.4309	3.62947	0.198574	0.354229	0.559193	0.370893	0.602018	0.550073	0.18657	2.9483	1	96	0.0891926	1	0.262351	62	18	0.0471034	0.141897	0.666667	0.0325758	1	0.136645
PGA45	6.27795	6.64995	0.371996	0.658212	0.535277	0.658897	0.554073	1.93041	0.406434	4.7496	1	96	0.0317516	1	0.129744	62	18	0.0836801	0.130596	0.671147	0.0281721	1	0.127177
PGA46	6.64002	6.26509	-0.374935	0.650864	0.644277	0.641718	0.644735	1.96104	0.412647	4.7523	1	96	0.0317042	1	0.129744	62	18	0.0814982	0.151966	0.679211	0.021529	1	0.107418
PGA47	5.80773	5.73462	-0.0731153	0.699958	0.642154	0.688104	0.645554	0.0745747	0.461119	0.1617	1	96	0.68849	1	0.835726	62	18	0.0873893	0.152159	0.528674	0.716655	1	0.845011
PGA49 (1)	6.55232	6.65727	0.104955	1.20353	0.574739	1.14864	0.57808	0.153666	1.10466	0.1391	1	96	0.71	1	0.846527	62	18	0.145878	0.136255	0.53405	0.665695	1	0.807007
PGA49 (2)	6.3529	6.5817	0.228802	0.852215	0.687356	0.842463	0.69059	0.730289	0.659	1.1082	1	96	0.295116	1	0.520936	62	18	0.106993	0.162774	0.635305	0.0829157	1	0.253561
PGA5	5.91187	5.86437	-0.0474965	0.612135	0.416348	0.621145	0.516309	0.03147	0.359831	0.0875	1	96	0.768019	1	0.873	62	18	0.0788855	0.121695	0.515233	0.849225	1	0.921127
PGA50	5.13285	5.42005	0.287198	0.674586	0.791537	0.662992	0.748622	1.15063	0.465903	2.4697	1	96	0.11935	1	0.319616	62	18	0.0842	0.176452	0.609319	0.161548	1	0.379078
PGA51	7.00351	6.69419	-0.30932	0.491719	0.492833	0.51172	0.509733	1.33472	0.261415	5.1058	1	96	0.0261069	1	0.116268	62	18	0.0649885	0.120145	0.678315	0.0221926	1	0.108446
PGA52	5.70949	5.5939	-0.115591	0.624219	0.543797	0.630663	0.607329	0.186391	0.39144	0.4762	1	96	0.491814	1	0.697963	62	18	0.0800943	0.143149	0.569892	0.371894	1	0.609958
PGA53	5.67806	6.04137	0.363302	0.743826	0.580695	0.740633	0.588294	1.84124	0.504415	3.6502	1	96	0.0590466	1	0.201353	62	18	0.0940605	0.138662	0.647849	0.0580504	1	0.200846
PGA54	6.14842	6.28871	0.140294	0.690067	0.698131	0.686587	0.706517	0.274571	0.477453	0.5751	1	96	0.450097	1	0.666706	62	18	0.0871966	0.166528	0.560932	0.436738	1	0.655107
PGA55 (2)	5.74542	5.43394	-0.311484	0.616801	0.552304	0.630563	0.601068	1.35346	0.389693	3.4731	1	96	0.0654309	1	0.216883	62	18	0.0800816	0.141673	0.646057	0.0611687	1	0.2071
PGA60	7.72097	7.6128	-0.10817	0.984991	0.541634	0.947926	0.639365	0.163226	0.791818	0.2061	1	96	0.650866	1	0.807619	62	18	0.120387	0.1507	0.52509	0.75136	1	0.86402
PGA9	7.1198	7.17347	0.0536761	0.641411	0.583047	0.644465	0.646708	0.0401917	0.415966	0.0966	1	96	0.756622	1	0.868375	62	18	0.0818471	0.15243	0.534946	0.657343	1	0.805117
PGK1	6.6733	6.5853	-0.0879963	0.540318	1.02639	0.543268	0.932523	0.10802	0.420343	0.257	1	96	0.613351	1	0.787882	62	18	0.0689951	0.219798	0.568996	0.378097	1	0.613759
PHO11	5.43588	5.39458	-0.0413004	0.588111	0.644113	0.587693	0.651019	0.0237948	0.362479	0.0656	1	96	0.798402	1	0.880099	62	18	0.0746371	0.153447	0.53405	0.665695	1	0.807007
PHR1	6.48381	5.98502	-0.498791	0.776793	0.553349	0.75684	0.607233	3.47065	0.528329	6.5691	1	96	0.0119298	1	0.0764152	62	18	0.0961188	0.143126	0.697133	0.0114385	1	0.0753033
PHR2	5.29458	5.69626	0.401678	0.609399	0.874625	0.614763	0.811715	2.25076	0.439166	5.1251	1	96	0.0258331	1	0.116268	62	18	0.078075	0.191323	0.632616	0.0892347	1	0.267704
PHR3	6.20132	6.23866	0.037337	0.506766	0.542822	0.511736	0.575136	0.019447	0.276892	0.0702	1	96	0.791614	1	0.880099	62	18	0.0649905	0.135561	0.536738	0.640766	1	0.797173
PIL1	6.60806	6.69693	0.0888719	0.891916	0.696848	0.871257	0.653242	0.11018	0.686651	0.1605	1	96	0.689587	1	0.835726	62	18	0.11065	0.153971	0.53853	0.624366	1	0.785012
PIR32 (IPF7274)	5.86003	5.46318	-0.396846	0.633954	0.544884	0.636656	0.620344	2.19694	0.400862	5.4805	1	96	0.0212983	1	0.107398	62	18	0.0808554	0.146217	0.689068	0.0152951	1	0.0852928
PLB1	5.32557	5.20832	-0.117246	0.622047	0.748599	0.630057	0.721581	0.191766	0.423934	0.4523	1	96	0.50286	1	0.707287	62	18	0.0800173	0.170078	0.566308	0.397082	1	0.625305
PLB3 (1.1)	6.46556	6.42004	-0.0455276	0.382774	0.855592	0.408229	0.806358	0.0289151	0.272043	0.1063	1	96	0.745106	1	0.865638	62	18	0.0518452	0.19006	0.530466	0.699514	1	0.826857
PLB3 (1.2)	5.214	5.93293	0.718923	0.666868	0.821284	0.661757	0.785179	7.21006	0.476844	15.1204	1	96	0.000185801	0.0880696	0.00352278	62	18	0.0840432	0.185069	0.747312	0.00150238	0.712126	0.0197636
PLB4	5.33505	5.48645	0.151393	0.64615	0.616266	0.654193	0.653161	0.31973	0.427674	0.7476	1	96	0.389393	1	0.617298	62	18	0.0830825	0.153952	0.579749	0.307885	1	0.554896
PLB5	5.78233	6.22809	0.445761	0.574694	0.983204	0.586057	0.890829	2.77191	0.441564	6.2775	1	96	0.0139113	1	0.0814069	62	18	0.0744293	0.20997	0.646953	0.0595926	1	0.203215
PMA1 (1)	7.08941	7.08369	-0.00571419	0.52135	0.535013	0.53868	0.559204	0.000455495	0.295087	0.0015	1	96	0.969186	1	0.97641	62	18	0.0684124	0.131806	0.509857	0.903709	1	0.954027
PMA1 (2)	5.66447	5.9331	0.268636	0.747116	0.671128	0.741407	0.678193	1.00671	0.530126	1.899	1	96	0.171394	1	0.394861	62	18	0.0941588	0.159852	0.620968	0.121222	1	0.317453
PPS1 (1)	6.31082	6.39946	0.0886487	0.523737	0.567796	0.532967	0.608612	0.109627	0.302875	0.362	1	96	0.548816	1	0.751036	62	18	0.0676868	0.143451	0.555556	0.478583	1	0.679186
PPS1 (2)	6.86906	6.89197	0.0229135	0.752762	0.858982	0.722981	0.829625	0.00732413	0.558788	0.0131	1	96	0.909116	1	0.955479	62	18	0.0918186	0.195544	0.522401	0.777728	1	0.873562
PRA1	5.84648	6.10489	0.258416	0.500261	0.526573	0.515691	0.614395	0.931566	0.290248	3.2096	1	96	0.0763583	1	0.242912	62	18	0.0654928	0.144814	0.629928	0.095936	1	0.277226
PRY2	6.05346	5.91706	-0.136397	0.693194	0.695966	0.689166	0.710293	0.259529	0.481394	0.5391	1	96	0.464596	1	0.677865	62	18	0.0875242	0.167418	0.55914	0.450447	1	0.663008
RAD50 (1) (IPF11620)	6.80178	6.53382	-0.267961	0.748431	0.888616	0.745859	0.814403	1.00166	0.579614	1.7281	1	96	0.191786	1	0.419036	62	18	0.0947242	0.191957	0.590502	0.246893	1	0.481593
RAS1	7.37251	6.64275	-0.729755	0.79568	0.859071	0.776811	0.776017	7.42896	0.603166	12.3166	1	96	0.000685339	0.324851	0.00877975	62	18	0.0986551	0.182909	0.734767	0.00258746	1	0.0278741
RAS2	6.31004	6.7012	0.391153	0.499087	0.473262	0.514394	0.511545	2.13436	0.263964	8.0858	1	96	0.00545153	1	0.0416778	62	18	0.0653281	0.120572	0.704301	0.00876251	1	0.0638989
RAX2 (2) (IPF15377)	6.11725	6.06082	-0.0564215	0.480019	0.403979	0.50369	0.506677	0.0444083	0.254362	0.1746	1	96	0.676989	1	0.829714	62	18	0.0639687	0.119425	0.523297	0.768908	1	0.865707
RBT1	7.09993	6.94584	-0.154092	0.858978	0.550727	0.835807	0.573464	0.331233	0.617995	0.536	1	96	0.465879	1	0.677865	62	18	0.106148	0.135167	0.573477	0.347722	1	0.595019
RBT5	8.14935	8.56364	0.414287	1.17333	1.37711	1.14611	1.30138	2.39429	1.39639	1.7146	1	96	0.193515	1	0.419036	62	18	0.145556	0.306739	0.592294	0.237614	1	0.47125
RHR2	6.11404	5.82653	-0.287515	0.534411	0.442953	0.543082	0.495716	1.15317	0.284215	4.0574	1	96	0.046776	1	0.17469	62	18	0.0689715	0.116841	0.667563	0.0316507	1	0.136386
RSR1	6.50119	6.66431	0.163119	0.974068	0.535507	0.935688	0.537016	0.371177	0.747548	0.4965	1	96	0.482748	1	0.688597	62	18	0.118832	0.126576	0.634409	0.0849804	1	0.256565
RTA3 (YOR49)	5.98967	6.35814	0.368467	0.520853	0.547688	0.53636	0.574145	1.89396	0.296827	6.3807	1	96	0.0131733	1	0.0810166	62	18	0.0681177	0.135327	0.675627	0.0242914	1	0.114001
SAM2	6.20419	5.80713	-0.397061	0.594861	0.696653	0.589363	0.680011	2.19932	0.372427	5.9054	1	96	0.0169527	1	0.0902873	62	18	0.0748492	0.16028	0.648746	0.0565414	1	0.200005
SAP1	6.07599	6.20382	0.127831	0.550665	0.725469	0.561003	0.69498	0.227955	0.351399	0.6487	1	96	0.422568	1	0.652435	62	18	0.0712474	0.163808	0.561828	0.429974	1	0.651143
SAP10	5.70894	5.69177	-0.017171	0.497883	0.561434	0.521584	0.606377	0.00411305	0.292895	0.014	1	96	0.90606	1	0.954383	62	18	0.0662412	0.142925	0.500896	0.995404	1	0.999621
SAP2	5.31693	5.15477	-0.162168	0.433866	0.542969	0.476395	0.577625	0.366862	0.250207	1.4662	1	96	0.228919	1	0.450239	62	18	0.0605023	0.136148	0.605735	0.175801	1	0.402558
SAP3	7.40088	6.99672	-0.404158	0.443688	0.493203	0.486938	0.559858	2.27865	0.253745	8.9801	1	96	0.00347366	1	0.0293712	62	18	0.0618411	0.13196	0.729391	0.00324219	1	0.0313632
SAP30 (IPF1183)	4.95	5.11624	0.166241	0.388868	0.452386	0.413358	0.521589	0.385524	0.192919	1.9984	1	96	0.1607	1	0.382163	62	18	0.0524965	0.12294	0.626344	0.105491	1	0.289033
SAP4	5.65529	5.52472	-0.13057	0.93546	0.864585	0.909308	0.808396	0.237828	0.789063	0.3014	1	96	0.584281	1	0.770291	62	18	0.115482	0.190541	0.526882	0.73394	1	0.85476
SAP5	5.41117	5.51006	0.0988875	0.638313	0.529001	0.637645	0.603782	0.136413	0.397429	0.3432	1	96	0.559363	1	0.757537	62	18	0.080981	0.142313	0.558244	0.457392	1	0.663008
SAP6	6.26827	6.30797	0.0397065	0.416085	0.527099	0.450445	0.595571	0.0219937	0.235986	0.0932	1	96	0.760809	1	0.868972	62	18	0.0572065	0.140377	0.533154	0.67409	1	0.808908
SAP7	6.15661	6.22798	0.0713722	0.566355	0.587027	0.571944	0.614657	0.0710611	0.338167	0.2101	1	96	0.647725	1	0.805831	62	18	0.072637	0.144876	0.535842	0.649033	1	0.80115
SAP8	6.43458	6.34344	-0.091146	0.677433	0.483357	0.671186	0.556338	0.115891	0.419765	0.2761	1	96	0.60048	1	0.777671	62	18	0.0852407	0.13113	0.557348	0.464396	1	0.663024
SAP9	5.08793	5.17089	0.0829614	0.662487	0.801516	0.649369	0.744628	0.0960122	0.450621	0.2131	1	96	0.645393	1	0.805831	62	18	0.0824699	0.175511	0.508961	0.912841	1	0.957271
SAP99	5.64696	5.97573	0.328766	0.504942	0.568164	0.540462	0.60955	1.50781	0.309416	4.8731	1	96	0.0296606	1	0.124417	62	18	0.0686388	0.143672	0.679211	0.021529	1	0.107418
SAP99 (IPF11977)	5.67641	5.64286	-0.0335467	0.512457	0.796306	0.543576	0.766608	0.015699	0.359162	0.0437	1	96	0.834856	1	0.907618	62	18	0.0690342	0.180691	0.524194	0.760119	1	0.86402
SCW11	6.45736	6.28125	-0.176111	0.479662	0.604449	0.493481	0.63469	0.432659	0.278245	1.555	1	96	0.215433	1	0.435907	62	18	0.0626722	0.149598	0.592294	0.237614	1	0.47125
SCW4	7.17208	6.87947	-0.292609	0.550113	0.804826	0.563638	0.820826	1.1944	0.395292	3.0216	1	96	0.0853686	1	0.260617	62	18	0.0715821	0.193471	0.617384	0.13269	1	0.332777
SDH2	6.82352	6.50598	-0.317539	0.48709	0.582122	0.514021	0.610568	1.40659	0.287882	4.886	1	96	0.0294507	1	0.124417	62	18	0.0652808	0.143912	0.657706	0.0431706	1	0.169115
SGA1 (IPF8402)	6.0944	6.03991	-0.0544844	0.794235	0.778836	0.776594	0.736474	0.0414113	0.589868	0.0702	1	96	0.791614	1	0.880099	62	18	0.0986276	0.173589	0.523297	0.768908	1	0.865707
SIT1	6.13417	6.3901	0.255928	0.933423	1.14424	0.901723	0.99242	0.91371	0.850546	1.0743	1	96	0.30258	1	0.523781	62	18	0.114519	0.233916	0.552867	0.500299	1	0.695431
SLK19	8.34755	8.52117	0.173619	1.23471	0.98821	1.20467	1.03887	0.420503	1.37015	0.3069	1	96	0.580877	1	0.769094	62	18	0.152993	0.244864	0.551971	0.507653	1	0.699498
SLN1 (1)	7.71775	6.76072	-0.95703	0.936677	0.998104	0.905314	0.903764	12.7769	0.818982	15.601	1	96	0.000149245	0.0707423	0.00321556	62	18	0.114975	0.213019	0.772401	0.000470819	0.223168	0.0105757
SLN1 (2)	6.65391	7.3166	0.662687	0.52516	1.28695	0.533784	1.11842	6.12619	0.495451	12.3649	1	96	0.000669822	0.317496	0.00877975	62	18	0.0677906	0.263615	0.629928	0.095936	1	0.277226
SLN1 (2)	5.45889	6.14081	0.681924	0.572105	0.589113	0.575152	0.631345	6.48704	0.345576	18.7716	1	96	3.62655e-05	0.0171898	0.00114599	62	18	0.0730444	0.148809	0.815412	5.12456e-05	0.0242904	0.00297746
SMF12	5.66867	6.23002	0.561345	0.55707	0.747836	0.581745	0.726277	4.39576	0.379631	11.579	1	96	0.000974201	0.461771	0.0109946	62	18	0.0738817	0.171185	0.727599	0.00349193	1	0.0324544
SNF3	5.5882	5.35625	-0.231952	0.96843	0.866516	0.936026	0.798671	0.750536	0.824214	0.9106	1	96	0.342352	1	0.573155	62	18	0.118875	0.188248	0.552867	0.500299	1	0.695431
SNQ2 (1)	6.83912	6.76976	-0.0693595	0.275999	0.732914	0.332625	0.721604	0.0671099	0.200015	0.3355	1	96	0.563795	1	0.761364	62	18	0.0422435	0.170084	0.542115	0.592126	1	0.756516
SNQ2 (2)	6.36584	6.47976	0.113918	0.274438	0.311784	0.362188	0.474979	0.181034	0.15176	1.1929	1	96	0.277479	1	0.503927	62	18	0.0459979	0.111954	0.594982	0.224161	1	0.466019
SNQ2 (3)	5.87295	6.27811	0.405165	0.3577	0.582729	0.414809	0.617495	2.29001	0.217668	10.5206	1	96	0.00162461	0.770064	0.016043	62	18	0.0526808	0.145545	0.752688	0.00118131	0.559942	0.0164689
SPR1	5.9752	6.09746	0.122257	0.634022	0.678713	0.630597	0.704949	0.208508	0.419295	0.4973	1	96	0.482396	1	0.688597	62	18	0.0800859	0.166158	0.531362	0.691	1	0.818835
SRB1	5.9045	6.11576	0.21126	0.610334	0.487219	0.62047	0.593053	0.622597	0.377732	1.6483	1	96	0.202281	1	0.424252	62	18	0.0787998	0.139784	0.612903	0.148185	1	0.363937
SSA2	5.86359	6.27484	0.411256	0.706081	0.790517	0.702111	0.747925	2.35938	0.507439	4.6496	1	96	0.0335593	1	0.135958	62	18	0.0891682	0.176288	0.654122	0.0481583	1	0.17974
SSB1	6.77932	6.93497	0.155657	0.70394	0.615825	0.705722	0.657689	0.337997	0.483771	0.6987	1	96	0.405297	1	0.640369	62	18	0.0896268	0.155019	0.584229	0.281356	1	0.520949
SSU1	6.51822	6.64578	0.127565	0.490004	0.427068	0.503214	0.490139	0.227005	0.250393	0.9066	1	96	0.343409	1	0.573155	62	18	0.0639082	0.115527	0.582437	0.291776	1	0.538139
SSY1 (1)	4.71402	5.19407	0.480052	0.67247	0.662674	0.65403	0.658354	3.21477	0.428992	7.4938	1	96	0.00737844	1	0.0529906	62	18	0.0830619	0.155175	0.703405	0.00906318	1	0.0650901
SSY1 (2)	7.12245	6.99814	-0.124306	0.335295	0.550085	0.389611	0.591347	0.215556	0.194928	1.1058	1	96	0.295637	1	0.520936	62	18	0.0494807	0.139382	0.527778	0.72528	1	0.850947
STE2	6.49815	6.12812	-0.370033	0.638646	0.585339	0.641007	0.699203	1.9101	0.427889	4.464	1	96	0.0372107	1	0.144573	62	18	0.081408	0.164804	0.665771	0.033524	1	0.136986
STE4	5.34612	5.54803	0.201917	0.722134	0.805984	0.715543	0.772363	0.568749	0.530428	1.0722	1	96	0.30305	1	0.523781	62	18	0.090874	0.182048	0.56362	0.416632	1	0.64118
SUL2 (1)	7.21503	6.93456	-0.280474	0.601684	0.496889	0.610476	0.581849	1.09739	0.365242	3.0045	1	96	0.0862443	1	0.260617	62	18	0.0775306	0.137143	0.662186	0.0375563	1	0.150862
SUL2 (2)	6.58544	6.59147	0.00602682	0.4109	0.59792	0.456454	0.642587	0.0005067	0.252935	0.002	1	96	0.964422	1	0.975614	62	18	0.0579697	0.151459	0.525986	0.742633	1	0.858557
SUN41	5.50317	5.8367	0.333536	0.650142	0.423514	0.648559	0.496079	1.55189	0.382589	4.0563	1	96	0.0468052	1	0.17469	62	18	0.082367	0.116927	0.72491	0.00389946	1	0.0342286
SUN42	6.06379	6.40631	0.342523	0.547067	0.633296	0.559834	0.660395	1.63664	0.340158	4.8114	1	96	0.0306863	1	0.127591	62	18	0.071099	0.155657	0.665771	0.033524	1	0.136986
SYG1 (1)	6.86292	6.72487	-0.138052	0.399026	0.505571	0.40719	0.550096	0.265863	0.195619	1.3591	1	96	0.246582	1	0.466701	62	18	0.0517132	0.129659	0.557348	0.464396	1	0.663024
SYG1 (2)	5.80561	5.54944	-0.256164	0.500844	0.699553	0.515435	0.694902	0.915401	0.313015	2.9245	1	96	0.0904744	1	0.263097	62	18	0.0654603	0.16379	0.619176	0.126855	1	0.323275
TDH3	6.22587	6.2336	0.00773183	0.540067	0.446713	0.542185	0.548097	0.000833949	0.29537	0.0028	1	96	0.95791	1	0.975125	62	18	0.0688576	0.129188	0.503584	0.967833	1	0.988692
TEF1	6.64932	6.42685	-0.222467	0.504202	0.480766	0.511992	0.583526	0.690407	0.279216	2.4727	1	96	0.119129	1	0.319616	62	18	0.0650231	0.137538	0.598566	0.207084	1	0.450265
TKL1	7.56698	7.2755	-0.291479	0.595533	0.66092	0.619481	0.673282	1.18519	0.398916	2.971	1	96	0.0879886	1	0.260666	62	18	0.0786742	0.158694	0.642473	0.0678221	1	0.221708
TOS1	6.98562	7.28943	0.303815	0.454394	0.482587	0.475204	0.565561	1.28764	0.246315	5.2276	1	96	0.0244291	1	0.115794	62	18	0.060351	0.133304	0.669355	0.0298679	1	0.131087
UTR2	7.73572	7.61129	-0.124432	0.272339	0.486428	0.335782	0.611401	0.215992	0.169647	1.2732	1	96	0.261979	1	0.479452	62	18	0.0426443	0.144108	0.560932	0.436738	1	0.655107
WSC4	7.86298	7.53334	-0.329638	0.316031	0.564863	0.382523	0.601385	1.51583	0.193257	7.8436	1	96	0.00616746	1	0.0456777	62	18	0.0485805	0.141748	0.682796	0.0190443	1	0.0981195
XOG1 (EXG1)	5.62641	5.90392	0.277502	0.614614	0.54927	0.630969	0.614239	1.07425	0.393582	2.7294	1	96	0.101784	1	0.282137	62	18	0.0801332	0.144778	0.642473	0.0678221	1	0.221708
YHV1	7.00746	6.95467	-0.052793	0.345944	0.362682	0.389394	0.505469	0.03888	0.174266	0.2231	1	96	0.63776	1	0.805831	62	18	0.0494531	0.11914	0.551075	0.515062	1	0.701551
YOR049C	6.01005	6.70321	0.693162	0.780073	0.513146	0.756089	0.538592	6.7026	0.510299	13.1347	1	96	0.00046594	0.220856	0.00693484	62	18	0.0960235	0.126947	0.764337	0.000690972	0.327521	0.012597
YPS7 (IPF6613)	8.31579	8.25203	-0.0637666	1.28242	1.21563	1.24993	1.19697	0.0567232	1.53409	0.037	1	96	0.847871	1	0.915469	62	18	0.158742	0.282128	0.509857	0.903709	1	0.954027
Controls	Mean1 (Controls)	Mean2 (Ca patients)	M2-M1	SD1	SD2	bayesSD1	bayesSD2	MSE.B	MSE.W	Fstat	dfBetBayes	dfWithBayes	p.value	Bonferroni	BH	Reps_Cond_1	Reps_Cond_2	StdErr_Cond_1	StdErr_Cond_2	AUC_Cond_1	AUC_PVal_Cond_1	Bonferroni_AUC_Cond_1	BH_AUC_Cond_1
No DNA.01	5.81401	6.25358	0.439566	0.746045	0.720205	0.730235	0.689091	2.6954	0.520516	5.1783	1	96	0.0250941	1	0.116268	62	18	0.09274	0.16242	0.66129	0.0386266	1	0.153857
No DNA.02	5.91681	6.25192	0.335115	0.694353	0.631619	0.688464	0.63018	1.56661	0.457232	3.4263	1	96	0.0672403	1	0.221333	62	18	0.087435	0.148535	0.638889	0.0750595	1	0.237188
No DNA.03	6.70156	6.93782	0.236267	0.593911	0.558197	0.597202	0.592922	0.778716	0.35554	2.1902	1	96	0.142166	1	0.352809	62	18	0.0758447	0.139753	0.620072	0.124013	1	0.321214
No DNA.04	6.90115	6.98691	0.0857569	0.543974	0.645822	0.546376	0.649729	0.102592	0.32547	0.3152	1	96	0.575815	1	0.764527	62	18	0.0693899	0.153143	0.557348	0.464396	1	0.663024
No DNA.05	5.73001	5.87943	0.149419	0.693641	0.873706	0.692401	0.829674	0.311448	0.524957	0.5933	1	96	0.443037	1	0.666666	62	18	0.087935	0.195556	0.565412	0.403536	1	0.631275
No DNA.06	5.66449	5.89939	0.234908	0.704361	0.727581	0.708654	0.735404	0.769784	0.510609	1.5076	1	96	0.222508	1	0.443146	62	18	0.0899991	0.173336	0.598566	0.207084	1	0.450265
No DNA.07	5.78072	5.56447	-0.216258	0.783086	0.631076	0.768812	0.65381	0.652409	0.555414	1.1746	1	96	0.281173	1	0.508686	62	18	0.0976392	0.154105	0.569892	0.371894	1	0.609958
No DNA.08	5.72125	5.80152	0.0802644	0.709088	0.5898	0.703517	0.610442	0.0898712	0.468282	0.1919	1	96	0.662324	1	0.817469	62	18	0.0893468	0.143882	0.572581	0.353669	1	0.600857
No DNA.09	6.7896	7.00724	0.21764	0.426499	0.376245	0.458226	0.493963	0.66077	0.217388	3.0396	1	96	0.0844574	1	0.260617	62	18	0.0581948	0.116428	0.72043	0.00467559	1	0.0388812
No DNA.10	6.71725	6.8246	0.107351	0.407124	0.598422	0.43883	0.618665	0.160763	0.23402	0.687	1	96	0.409243	1	0.642321	62	18	0.0557314	0.145821	0.576165	0.330264	1	0.579797
No DNA.11	6.38684	6.28693	-0.0999103	0.732016	0.938383	0.717619	0.857184	0.13925	0.56288	0.2474	1	96	0.620049	1	0.792192	62	18	0.0911377	0.20204	0.535842	0.649033	1	0.80115
No DNA.12	6.4766	6.31696	-0.159643	0.662396	0.880671	0.649775	0.815234	0.35553	0.475038	0.7484	1	96	0.38914	1	0.617298	62	18	0.0825216	0.192152	0.543907	0.576297	1	0.75252
No DNA.13	6.36789	6.61067	0.242785	0.523817	0.749106	0.547525	0.74566	0.822274	0.355628	2.3122	1	96	0.131649	1	0.33914	62	18	0.0695358	0.175754	0.621864	0.118479	1	0.315501
No DNA.14	6.47689	6.62052	0.143636	0.533844	0.732918	0.538581	0.70063	0.287805	0.333837	0.8621	1	96	0.35548	1	0.583037	62	18	0.0683999	0.16514	0.562724	0.423272	1	0.647197
No DNA.15	6.34721	6.52703	0.179817	0.50287	0.753572	0.543599	0.725344	0.451063	0.345764	1.3045	1	96	0.256234	1	0.476857	62	18	0.0690372	0.170965	0.587814	0.261283	1	0.501409
No DNA.16	6.50467	6.72106	0.216389	0.478752	0.724002	0.499224	0.679952	0.6532	0.295672	2.2092	1	96	0.140467	1	0.350937	62	18	0.0634016	0.160266	0.594982	0.224161	1	0.466019
No DNA.17	5.27745	5.72829	0.450846	0.649107	0.808674	0.643627	0.753369	2.83551	0.44767	6.3339	1	96	0.0135028	1	0.0810166	62	18	0.0817407	0.177571	0.65681	0.0443747	1	0.172407
No DNA.18	5.36831	5.71375	0.34544	0.754024	0.814419	0.74604	0.775366	1.66464	0.566299	2.9395	1	96	0.0896642	1	0.262351	62	18	0.0947471	0.182755	0.611111	0.154757	1	0.372359
Average:	6.16348	6.32956
