# Supplementary material for: Serological Profiling of a Candida albicans Protein Microarray Reveals Permanent Host-Pathogen Interplay and Stage-Specific Responses during Candidemia
Source: PLoS Pathog. 2010 Mar 26;6(3):e1000827. doi: 10.1371/journal.ppat.1000827 (PMC2845659; doi:10.1371/journal.ppat.1000827)
Supplement: Table S2 — List of proteins and primer sequences on microarray (0.22 MB XLS) [file ppat.1000827.s006.xls]

## Sheet: Primer Sequences
Gene	size (bp)	start len Tm gc%	5' with overlapping sequence added (final)	5' overlapping sequence	forward primer	start len Tm gc%	3' with overlapping sequence added (final)	3' overlapping sequence	reverse primer	product size
19.1002	1893	139 21 62.59 47.62	CATATCGACGACGACGACAAGCATATGCTCGAGAAAGCTGTCGCTTCCTCGATT	CATATCGACGACGACGACAAGCATATGCTCGAG	AAAGCTGTCGCTTCCTCGATT	1644 24 62.37 37.50	ATCTTAAGCGTAATCCGGAACATCGTATGGGTAAAAAGATCCACGTAGCTTTTGCAT	ATCTTAAGCGTAATCCGGAACATCGTATGGGTA	AAAAGATCCACGTAGCTTTTGCAT	1506
19.111	1707	193 25 64.46 40.00	CATATCGACGACGACGACAAGCATATGCTCGAGCATGTTTCTATGATTGCCATTGGTG	CATATCGACGACGACGACAAGCATATGCTCGAG	CATGTTTCTATGATTGCCATTGGTG	1668 25 63.14 40.00	ATCTTAAGCGTAATCCGGAACATCGTATGGGTAAGGTTCAGGTACATCAAATTCAGCA	ATCTTAAGCGTAATCCGGAACATCGTATGGGTA	AGGTTCAGGTACATCAAATTCAGCA	1476
19.1193	1740	181 21 63.47 47.62	CATATCGACGACGACGACAAGCATATGCTCGAGGGACAGCAATTGGCAAAAGGT	CATATCGACGACGACGACAAGCATATGCTCGAG	GGACAGCAATTGGCAAAAGGT	1710 22 63.58 50.00	ATCTTAAGCGTAATCCGGAACATCGTATGGGTATTTATGCCATGGAGCTCTGTCC	ATCTTAAGCGTAATCCGGAACATCGTATGGGTA	TTTATGCCATGGAGCTCTGTCC	1530
19.1376	888	205 24 64.88 37.50	CATATCGACGACGACGACAAGCATATGCTCGAGCATGGGTTGGATTTGAATGATGAA	CATATCGACGACGACGACAAGCATATGCTCGAG	CATGGGTTGGATTTGAATGATGAA	807 23 65.58 43.48	ATCTTAAGCGTAATCCGGAACATCGTATGGGTATTTCTTCTTTCTGGCGGATTTGG	ATCTTAAGCGTAATCCGGAACATCGTATGGGTA	TTTCTTCTTTCTGGCGGATTTGG	603
19.1442	2103	154 20 63.92 50.00	CATATCGACGACGACGACAAGCATATGCTCGAGATCCGTGAAGCCGATTCCAT	CATATCGACGACGACGACAAGCATATGCTCGAG	ATCCGTGAAGCCGATTCCAT	1860 20 63.29 55.00	ATCTTAAGCGTAATCCGGAACATCGTATGGGTATTCAGCAGGTCCGCTAGCAT	ATCTTAAGCGTAATCCGGAACATCGTATGGGTA	TTCAGCAGGTCCGCTAGCAT	1707
19.1582	1725	154 19 65.10 57.89	CATATCGACGACGACGACAAGCATATGCTCGAGCCATTGCGCTGGAGCAAAC	CATATCGACGACGACGACAAGCATATGCTCGAG	CCATTGCGCTGGAGCAAAC	1653 20 63.83 50.00	ATCTTAAGCGTAATCCGGAACATCGTATGGGTATCCCCACACCAACAAAATGG	ATCTTAAGCGTAATCCGGAACATCGTATGGGTA	TCCCCACACCAACAAAATGG	1500
19.1585	1113	274 21 64.02 47.62	CATATCGACGACGACGACAAGCATATGCTCGAGTCCCTCGGCAATGAATGTCTT	CATATCGACGACGACGACAAGCATATGCTCGAG	TCCCTCGGCAATGAATGTCTT	1089 20 63.90 60.00	ATCTTAAGCGTAATCCGGAACATCGTATGGGTACATAAGACCGGCTCCCCAAC	ATCTTAAGCGTAATCCGGAACATCGTATGGGTA	CATAAGACCGGCTCCCCAAC	816
19.1607	2790	169 25 63.48 36.00	CATATCGACGACGACGACAAGCATATGCTCGAGAGCGAAAAACAACAACAACAACATC	CATATCGACGACGACGACAAGCATATGCTCGAG	AGCGAAAAACAACAACAACAACATC	1497 22 63.01 36.36	ATCTTAAGCGTAATCCGGAACATCGTATGGGTATTTGGCCAACATTTTCATTTCC	ATCTTAAGCGTAATCCGGAACATCGTATGGGTA	TTTGGCCAACATTTTCATTTCC	1329
19.1738	1419	109 23 63.76 47.83	CATATCGACGACGACGACAAGCATATGCTCGAGACTGAAAAGGCATCAGGATCCAC	CATATCGACGACGACGACAAGCATATGCTCGAG	ACTGAAAAGGCATCAGGATCCAC	1272 24 63.51 33.33	ATCTTAAGCGTAATCCGGAACATCGTATGGGTAAATGGTCAAATGATCCAATTCCAA	ATCTTAAGCGTAATCCGGAACATCGTATGGGTA	AATGGTCAAATGATCCAATTCCAA	1164
19.1943	2373	276 24 63.52 41.67	CATATCGACGACGACGACAAGCATATGCTCGAGTGGGACAAATAAAGTTGGAGCAAG	CATATCGACGACGACGACAAGCATATGCTCGAG	TGGGACAAATAAAGTTGGAGCAAG	2078 24 63.42 41.67	ATCTTAAGCGTAATCCGGAACATCGTATGGGTATTCTTGGTCTTGGTTTTACCATCG	ATCTTAAGCGTAATCCGGAACATCGTATGGGTA	TTCTTGGTCTTGGTTTTACCATCG	1803
19.1978	1605	103 23 62.56 43.48	CATATCGACGACGACGACAAGCATATGCTCGAGGTCGATGAAGATTTCCAACCTGA	CATATCGACGACGACGACAAGCATATGCTCGAG	GTCGATGAAGATTTCCAACCTGA	1431 22 64.35 45.45	ATCTTAAGCGTAATCCGGAACATCGTATGGGTATCCAACATGAGGGCACAAAAAG	ATCTTAAGCGTAATCCGGAACATCGTATGGGTA	TCCAACATGAGGGCACAAAAAG	1329
19.1979	1608	175 20 65.88 55.00	CATATCGACGACGACGACAAGCATATGCTCGAGTGGCCAGCTTTTGCTTCTGG	CATATCGACGACGACGACAAGCATATGCTCGAG	TGGCCAGCTTTTGCTTCTGG	1530 23 64.99 47.83	ATCTTAAGCGTAATCCGGAACATCGTATGGGTAAACATCACCACCTTCTCCCAACA	ATCTTAAGCGTAATCCGGAACATCGTATGGGTA	AACATCACCACCTTCTCCCAACA	1356
19.198	1599	181 20 64.32 50.00	CATATCGACGACGACGACAAGCATATGCTCGAGTCCGGCGCAGGTTTATTTTC	CATATCGACGACGACGACAAGCATATGCTCGAG	TCCGGCGCAGGTTTATTTTC	1428 21 65.73 57.14	ATCTTAAGCGTAATCCGGAACATCGTATGGGTAATCTTGACCCACTGGCGGAAC	ATCTTAAGCGTAATCCGGAACATCGTATGGGTA	ATCTTGACCCACTGGCGGAAC	1248
19.2003	1617	202 25 64.19 44.00	CATATCGACGACGACGACAAGCATATGCTCGAGTCATGGTTGGGTATTCTGTCAACAC	CATATCGACGACGACGACAAGCATATGCTCGAG	TCATGGTTGGGTATTCTGTCAACAC	1602 25 63.81 40.00	ATCTTAAGCGTAATCCGGAACATCGTATGGGTAGCAAACATCTGGGAATTCAACTTCT	ATCTTAAGCGTAATCCGGAACATCGTATGGGTA	GCAAACATCTGGGAATTCAACTTCT	1401
19.2072	1710	124 20 64.68 50.00	CATATCGACGACGACGACAAGCATATGCTCGAGTTGGCGGTGGCTGATGATAA	CATATCGACGACGACGACAAGCATATGCTCGAG	TTGGCGGTGGCTGATGATAA	1659 19 64.21 52.63	ATCTTAAGCGTAATCCGGAACATCGTATGGGTATTGCAGGGCCAATTCATCC	ATCTTAAGCGTAATCCGGAACATCGTATGGGTA	TTGCAGGGCCAATTCATCC	1536
19.2175	1104	139 20 64.28 50.00	CATATCGACGACGACGACAAGCATATGCTCGAGAATGCCGCTGCTCCAAGATT	CATATCGACGACGACGACAAGCATATGCTCGAG	AATGCCGCTGCTCCAAGATT	1101 22 64.98 50.00	ATCTTAAGCGTAATCCGGAACATCGTATGGGTACGTAAAATGCTCCCCAGCTTTG	ATCTTAAGCGTAATCCGGAACATCGTATGGGTA	CGTAAAATGCTCCCCAGCTTTG	963
19.2222	1137	160 23 64.59 43.48	CATATCGACGACGACGACAAGCATATGCTCGAGTTTGAACCTCGGAAATGTGAAGC	CATATCGACGACGACGACAAGCATATGCTCGAG	TTTGAACCTCGGAAATGTGAAGC	1116 23 65.03 47.83	ATCTTAAGCGTAATCCGGAACATCGTATGGGTACCAAGTAATGGTTGATGGGGTGA	ATCTTAAGCGTAATCCGGAACATCGTATGGGTA	CCAAGTAATGGTTGATGGGGTGA	957
19.2312	2040	136 20 65.37 60.00	CATATCGACGACGACGACAAGCATATGCTCGAGGGCTCGCCTGATCCATTCTG	CATATCGACGACGACGACAAGCATATGCTCGAG	GGCTCGCCTGATCCATTCTG	1923 20 65.40 50.00	ATCTTAAGCGTAATCCGGAACATCGTATGGGTACCCAATCGAATTGCGTGCTT	ATCTTAAGCGTAATCCGGAACATCGTATGGGTA	CCCAATCGAATTGCGTGCTT	1788
19.2337	1632	169 21 65.22 52.38	CATATCGACGACGACGACAAGCATATGCTCGAGGGTGTCATTGGAACCGGGATT	CATATCGACGACGACGACAAGCATATGCTCGAG	GGTGTCATTGGAACCGGGATT	1596 22 64.35 45.45	ATCTTAAGCGTAATCCGGAACATCGTATGGGTATGCCCATCCTTTCAATGAGTTG	ATCTTAAGCGTAATCCGGAACATCGTATGGGTA	TGCCCATCCTTTCAATGAGTTG	1428
19.2397	1506	445 22 65.26 50.00	CATATCGACGACGACGACAAGCATATGCTCGAGAATGCTGGTGGGGTTATTGCTG	CATATCGACGACGACGACAAGCATATGCTCGAG	AATGCTGGTGGGGTTATTGCTG	1479 25 64.51 40.00	ATCTTAAGCGTAATCCGGAACATCGTATGGGTAGATCAATTGACAAACACCAGAAGCA	ATCTTAAGCGTAATCCGGAACATCGTATGGGTA	GATCAATTGACAAACACCAGAAGCA	1035
19.24	1362	100 23 65.22 47.83	CATATCGACGACGACGACAAGCATATGCTCGAGTCCCAAACTGTTGCCTCAGTGAT	CATATCGACGACGACGACAAGCATATGCTCGAG	TCCCAAACTGTTGCCTCAGTGAT	1200 23 65.13 43.48	ATCTTAAGCGTAATCCGGAACATCGTATGGGTACCAAACTGGATGGAATGGAATGA	ATCTTAAGCGTAATCCGGAACATCGTATGGGTA	CCAAACTGGATGGAATGGAATGA	1101
19.2429	1352	100 22 65.06 54.55	CATATCGACGACGACGACAAGCATATGCTCGAGGAGGGGTTGAGCGAATATGACG	CATATCGACGACGACGACAAGCATATGCTCGAG	GAGGGGTTGAGCGAATATGACG	1320 24 65.65 50.00	ATCTTAAGCGTAATCCGGAACATCGTATGGGTATTCACTTTCGTCCTCGGTTACTGG	ATCTTAAGCGTAATCCGGAACATCGTATGGGTA	TTCACTTTCGTCCTCGGTTACTGG	1221
19.2445	1647	181 24 64.97 41.67	CATATCGACGACGACGACAAGCATATGCTCGAGGTTGGTGTTTTTGGAACCGGATTA	CATATCGACGACGACGACAAGCATATGCTCGAG	GTTGGTGTTTTTGGAACCGGATTA	1605 25 64.59 44.00	ATCTTAAGCGTAATCCGGAACATCGTATGGGTACTTTATTGGAGGTTCTGGACGATCA	ATCTTAAGCGTAATCCGGAACATCGTATGGGTA	CTTTATTGGAGGTTCTGGACGATCA	1425
19.2492	1254	184 20 63.69 55.00	CATATCGACGACGACGACAAGCATATGCTCGAGGAAGCTTGGGATGGGCAAGT	CATATCGACGACGACGACAAGCATATGCTCGAG	GAAGCTTGGGATGGGCAAGT	1137 20 65.38 55.00	ATCTTAAGCGTAATCCGGAACATCGTATGGGTATGTTGCAGGCGAAGACTGGA	ATCTTAAGCGTAATCCGGAACATCGTATGGGTA	TGTTGCAGGCGAAGACTGGA	954
19.2517	1647	133 21 63.76 52.38	CATATCGACGACGACGACAAGCATATGCTCGAGCCAAATGACCCCTTGACTTGG	CATATCGACGACGACGACAAGCATATGCTCGAG	CCAAATGACCCCTTGACTTGG	1587 21 65.30 57.14	ATCTTAAGCGTAATCCGGAACATCGTATGGGTACCAACGCCTGAACCTCTTTCC	ATCTTAAGCGTAATCCGGAACATCGTATGGGTA	CCAACGCCTGAACCTCTTTCC	1455
19.2583	1872	142 22 63.48 50.00	CATATCGACGACGACGACAAGCATATGCTCGAGCCCAAAGGGTTAAGGAGACCAA	CATATCGACGACGACGACAAGCATATGCTCGAG	CCCAAAGGGTTAAGGAGACCAA	1716 20 63.38 50.00	ATCTTAAGCGTAATCCGGAACATCGTATGGGTAGGCACAAAGGAATCCAGCAA	ATCTTAAGCGTAATCCGGAACATCGTATGGGTA	GGCACAAAGGAATCCAGCAA	1575
19.2587	1497	172 22 64.74 45.45	CATATCGACGACGACGACAAGCATATGCTCGAGATTGGTTCAGGTGGTGCAATCA	CATATCGACGACGACGACAAGCATATGCTCGAG	ATTGGTTCAGGTGGTGCAATCA	1485 25 64.08 36.00	ATCTTAAGCGTAATCCGGAACATCGTATGGGTAATTGGCAATGAACTTAGCTTTTCCA	ATCTTAAGCGTAATCCGGAACATCGTATGGGTA	ATTGGCAATGAACTTAGCTTTTCCA	1314
19.2671	1344	169 20 64.46 55.00	CATATCGACGACGACGACAAGCATATGCTCGAGTTGGCGGAGCAGATACAACG	CATATCGACGACGACGACAAGCATATGCTCGAG	TTGGCGGAGCAGATACAACG	1269 23 63.06 52.17	ATCTTAAGCGTAATCCGGAACATCGTATGGGTATTCAACCTCACCAGCTAGCTCAC	ATCTTAAGCGTAATCCGGAACATCGTATGGGTA	TTCAACCTCACCAGCTAGCTCAC	1101
19.2677	1608	103 25 63.04 40.00	CATATCGACGACGACGACAAGCATATGCTCGAGTTGTCCAGGAACAGGCTATTAACAA	CATATCGACGACGACGACAAGCATATGCTCGAG	TTGTCCAGGAACAGGCTATTAACAA	1533 21 63.51 57.14	ATCTTAAGCGTAATCCGGAACATCGTATGGGTATGCATCTGGAGGGTACTCACG	ATCTTAAGCGTAATCCGGAACATCGTATGGGTA	TGCATCTGGAGGGTACTCACG	1431
19.2787	1233	214 19 65.13 68.42	CATATCGACGACGACGACAAGCATATGCTCGAGGCTCCTGCCCCAGCCTCTA	CATATCGACGACGACGACAAGCATATGCTCGAG	GCTCCTGCCCCAGCCTCTA	1215 25 64.59 40.00	ATCTTAAGCGTAATCCGGAACATCGTATGGGTATGAACCTTGACCAATGACATTACCA	ATCTTAAGCGTAATCCGGAACATCGTATGGGTA	TGAACCTTGACCAATGACATTACCA	1002
19.281	1947	178 22 64.77 54.55	CATATCGACGACGACGACAAGCATATGCTCGAGCATCCACGAGACCTCCTCAACA	CATATCGACGACGACGACAAGCATATGCTCGAG	CATCCACGAGACCTCCTCAACA	1914 20 64.33 50.00	ATCTTAAGCGTAATCCGGAACATCGTATGGGTACGGTTTGCTTTCCATGACGA	ATCTTAAGCGTAATCCGGAACATCGTATGGGTA	CGGTTTGCTTTCCATGACGA	1737
19.2945	1695	244 20 63.62 45.00	CATATCGACGACGACGACAAGCATATGCTCGAGGCATTTGCAATTTGGGCTTG	CATATCGACGACGACGACAAGCATATGCTCGAG	GCATTTGCAATTTGGGCTTG	1563 21 64.14 47.62	ATCTTAAGCGTAATCCGGAACATCGTATGGGTAAGCTTCCATGGCATTTCTCCA	ATCTTAAGCGTAATCCGGAACATCGTATGGGTA	AGCTTCCATGGCATTTCTCCA	1320
19.2946	1512	277 21 63.72 42.86	CATATCGACGACGACGACAAGCATATGCTCGAGTCGGCTCAAATTCATTGGACA	CATATCGACGACGACGACAAGCATATGCTCGAG	TCGGCTCAAATTCATTGGACA	1488 22 63.14 45.45	ATCTTAAGCGTAATCCGGAACATCGTATGGGTAATGATCATAGCGGCTTCTTCCA	ATCTTAAGCGTAATCCGGAACATCGTATGGGTA	ATGATCATAGCGGCTTCTTCCA	1212
19.2991	1761	139 22 65.07 50.00	CATATCGACGACGACGACAAGCATATGCTCGAGTACGATGCTTCCAGTCGACCAA	CATATCGACGACGACGACAAGCATATGCTCGAG	TACGATGCTTCCAGTCGACCAA	1761 24 63.37 41.67	ATCTTAAGCGTAATCCGGAACATCGTATGGGTATCAAAGACCATCTCTTGCTTCACA	ATCTTAAGCGTAATCCGGAACATCGTATGGGTA	TCAAAGACCATCTCTTGCTTCACA	1623
19.3112	1407	184 21 63.28 57.14	CATATCGACGACGACGACAAGCATATGCTCGAGACCACACCACCACTGAACCTG	CATATCGACGACGACGACAAGCATATGCTCGAG	ACCACACCACCACTGAACCTG	1404 22 63.82 50.00	ATCTTAAGCGTAATCCGGAACATCGTATGGGTACGCCCAATTACCCAATAAGCTC	ATCTTAAGCGTAATCCGGAACATCGTATGGGTA	CGCCCAATTACCCAATAAGCTC	1221
19.3195	1800	148 21 64.01 57.14	CATATCGACGACGACGACAAGCATATGCTCGAGCCACTAGCGTCGTCATCATCG	CATATCGACGACGACGACAAGCATATGCTCGAG	CCACTAGCGTCGTCATCATCG	1755 22 64.25 40.91	ATCTTAAGCGTAATCCGGAACATCGTATGGGTAATTGGCGGCTTTTTCTTCTTCA	ATCTTAAGCGTAATCCGGAACATCGTATGGGTA	ATTGGCGGCTTTTTCTTCTTCA	1608
19.3232	1566	133 20 64.06 55.00	CATATCGACGACGACGACAAGCATATGCTCGAGATCAACCTCCCACCGCTGTT	CATATCGACGACGACGACAAGCATATGCTCGAG	ATCAACCTCCCACCGCTGTT	1515 22 65.49 50.00	ATCTTAAGCGTAATCCGGAACATCGTATGGGTAACCCAATTCCTTTTGCCAGTCC	ATCTTAAGCGTAATCCGGAACATCGTATGGGTA	ACCCAATTCCTTTTGCCAGTCC	1383
19.3362	1344	160 20 65.31 50.00	CATATCGACGACGACGACAAGCATATGCTCGAGCAACTGCATTTGGCCGAACA	CATATCGACGACGACGACAAGCATATGCTCGAG	CAACTGCATTTGGCCGAACA	1269 23 63.06 52.17	ATCTTAAGCGTAATCCGGAACATCGTATGGGTATTCAACCTCACCAGCTAGCTCAC	ATCTTAAGCGTAATCCGGAACATCGTATGGGTA	TTCAACCTCACCAGCTAGCTCAC	1110
19.34	1560	163 23 64.64 43.48	CATATCGACGACGACGACAAGCATATGCTCGAGGGATTTGCCTTAATTTCCGATGG	CATATCGACGACGACGACAAGCATATGCTCGAG	GGATTTGCCTTAATTTCCGATGG	1551 22 63.62 40.91	ATCTTAAGCGTAATCCGGAACATCGTATGGGTATGCATCCACTTTTTCCACATCA	ATCTTAAGCGTAATCCGGAACATCGTATGGGTA	TGCATCCACTTTTTCCACATCA	1389
19.3538	2250	364 20 63.55 45.00	CATATCGACGACGACGACAAGCATATGCTCGAGTCCATGTGCAAGCCATTCAA	CATATCGACGACGACGACAAGCATATGCTCGAG	TCCATGTGCAAGCCATTCAA	2148 20 65.42 55.00	ATCTTAAGCGTAATCCGGAACATCGTATGGGTAATGCCCGCACGTAACAAAGC	ATCTTAAGCGTAATCCGGAACATCGTATGGGTA	ATGCCCGCACGTAACAAAGC	1785
19.3542	1320	196 24 65.22 45.83	CATATCGACGACGACGACAAGCATATGCTCGAGAACCCAGTGTTGACTGCAAAGACA	CATATCGACGACGACGACAAGCATATGCTCGAG	AACCCAGTGTTGACTGCAAAGACA	1308 21 65.98 61.90	ATCTTAAGCGTAATCCGGAACATCGTATGGGTATCCAGTGGTGACACCCTCAGC	ATCTTAAGCGTAATCCGGAACATCGTATGGGTA	TCCAGTGGTGACACCCTCAGC	1113
19.3641	1452	139 21 65.12 57.14	CATATCGACGACGACGACAAGCATATGCTCGAGCGTTGGGTGTCCAAGAGTTGC	CATATCGACGACGACGACAAGCATATGCTCGAG	CGTTGGGTGTCCAAGAGTTGC	1449 25 63.99 40.00	ATCTTAAGCGTAATCCGGAACATCGTATGGGTAGGCAATGATTAACCAAAACTTCTGC	ATCTTAAGCGTAATCCGGAACATCGTATGGGTA	GGCAATGATTAACCAAAACTTCTGC	1311
19.377	1179	214 20 64.11 55.00	CATATCGACGACGACGACAAGCATATGCTCGAGGTGGCTGCCCCATATGTCAA	CATATCGACGACGACGACAAGCATATGCTCGAG	GTGGCTGCCCCATATGTCAA	1116 20 64.39 60.00	ATCTTAAGCGTAATCCGGAACATCGTATGGGTAAAACGGGGTGCTAGGTGGTG	ATCTTAAGCGTAATCCGGAACATCGTATGGGTA	AAACGGGGTGCTAGGTGGTG	903
19.3795	1542	160 20 63.67 45.00	CATATCGACGACGACGACAAGCATATGCTCGAGATTGGGGCAAGTTTGGCATT	CATATCGACGACGACGACAAGCATATGCTCGAG	ATTGGGGCAAGTTTGGCATT	1467 25 64.44 36.00	ATCTTAAGCGTAATCCGGAACATCGTATGGGTACAAATTGACCCATTTCGATTTATGC	ATCTTAAGCGTAATCCGGAACATCGTATGGGTA	CAAATTGACCCATTTCGATTTATGC	1308
19.417	927	172 20 65.78 60.00	CATATCGACGACGACGACAAGCATATGCTCGAGGGAGCTGGATTCGGTGGTGA	CATATCGACGACGACGACAAGCATATGCTCGAG	GGAGCTGGATTCGGTGGTGA	891 25 64.54 44.00	ATCTTAAGCGTAATCCGGAACATCGTATGGGTAATCATCACAGTCATCGCTATCATCG	ATCTTAAGCGTAATCCGGAACATCGTATGGGTA	ATCATCACAGTCATCGCTATCATCG	720
19.4175	2226	367 20 64.24 50.00	CATATCGACGACGACGACAAGCATATGCTCGAGCCATTGATTGCCGCATGTCT	CATATCGACGACGACGACAAGCATATGCTCGAG	CCATTGATTGCCGCATGTCT	2106 20 65.67 50.00	ATCTTAAGCGTAATCCGGAACATCGTATGGGTAAACCAAACCCCGCAACATCA	ATCTTAAGCGTAATCCGGAACATCGTATGGGTA	AACCAAACCCCGCAACATCA	1740
19.4213	1875	103 23 64.70 47.83	CATATCGACGACGACGACAAGCATATGCTCGAGGCAAATCCTGATGGGGTTTATCC	CATATCGACGACGACGACAAGCATATGCTCGAG	GCAAATCCTGATGGGGTTTATCC	1710 21 63.67 52.38	ATCTTAAGCGTAATCCGGAACATCGTATGGGTAGCCTAAGAACGCAGCAACACA	ATCTTAAGCGTAATCCGGAACATCGTATGGGTA	GCCTAAGAACGCAGCAACACA	1608
19.4335	1533	184 20 64.94 50.00	CATATCGACGACGACGACAAGCATATGCTCGAGTGGGTTGTGCCACCATTTTG	CATATCGACGACGACGACAAGCATATGCTCGAG	TGGGTTGTGCCACCATTTTG	1488 20 63.32 50.00	ATCTTAAGCGTAATCCGGAACATCGTATGGGTATTGCTCACGTTCTGGCATTG	ATCTTAAGCGTAATCCGGAACATCGTATGGGTA	TTGCTCACGTTCTGGCATTG	1305
19.4463	1071	223 21 64.04 52.38	CATATCGACGACGACGACAAGCATATGCTCGAGGCCGGTTATATTTCCCGTGGT	CATATCGACGACGACGACAAGCATATGCTCGAG	GCCGGTTATATTTCCCGTGGT	939 24 65.11 37.50	ATCTTAAGCGTAATCCGGAACATCGTATGGGTATTCAATTTCGCAACATTGTTCACC	ATCTTAAGCGTAATCCGGAACATCGTATGGGTA	TTCAATTTCGCAACATTGTTCACC	717
19.45	1521	139 21 64.78 47.62	CATATCGACGACGACGACAAGCATATGCTCGAGTCGGGAAACTCGCATAAACCA	CATATCGACGACGACGACAAGCATATGCTCGAG	TCGGGAAACTCGCATAAACCA	1515 23 64.73 47.83	ATCTTAAGCGTAATCCGGAACATCGTATGGGTAGGGTGGAATTGATTTCACAGTGG	ATCTTAAGCGTAATCCGGAACATCGTATGGGTA	GGGTGGAATTGATTTCACAGTGG	1377
19.4515	744	100 25 65.49 40.00	CATATCGACGACGACGACAAGCATATGCTCGAGCATGGGGTTGAAACTGTTGAATTTG	CATATCGACGACGACGACAAGCATATGCTCGAG	CATGGGGTTGAAACTGTTGAATTTG	690 25 63.62 32.00	ATCTTAAGCGTAATCCGGAACATCGTATGGGTATTCAATTTCCTTACATTTGGCATCA	ATCTTAAGCGTAATCCGGAACATCGTATGGGTA	TTCAATTTCCTTACATTTGGCATCA	591
19.4526	1029	106 21 63.14 47.62	CATATCGACGACGACGACAAGCATATGCTCGAGAGTGATTGGCTTTGGGCTGTT	CATATCGACGACGACGACAAGCATATGCTCGAG	AGTGATTGGCTTTGGGCTGTT	1020 21 65.08 52.38	ATCTTAAGCGTAATCCGGAACATCGTATGGGTATTCTTCAGCTTCGGCTTGTGC	ATCTTAAGCGTAATCCGGAACATCGTATGGGTA	TTCTTCAGCTTCGGCTTGTGC	915
19.4546	1875	166 20 64.20 50.00	CATATCGACGACGACGACAAGCATATGCTCGAGCCGCATGATTCTCCCAATGA	CATATCGACGACGACGACAAGCATATGCTCGAG	CCGCATGATTCTCCCAATGA	1809 21 64.60 52.38	ATCTTAAGCGTAATCCGGAACATCGTATGGGTATTTGGAAGGAGCCACACTTGG	ATCTTAAGCGTAATCCGGAACATCGTATGGGTA	TTTGGAAGGAGCCACACTTGG	1644
19.465	2826	127 19 64.88 63.16	CATATCGACGACGACGACAAGCATATGCTCGAGTACCCTGGGGCATCCTGGT	CATATCGACGACGACGACAAGCATATGCTCGAG	TACCCTGGGGCATCCTGGT	1434 21 64.23 47.62	ATCTTAAGCGTAATCCGGAACATCGTATGGGTATTCAAATGCAGACTCGCTGGA	ATCTTAAGCGTAATCCGGAACATCGTATGGGTA	TTCAAATGCAGACTCGCTGGA	1308
19.4679	1707	127 24 64.75 45.83	CATATCGACGACGACGACAAGCATATGCTCGAGTCCGTTGATACTGACCACACACAA	CATATCGACGACGACGACAAGCATATGCTCGAG	TCCGTTGATACTGACCACACACAA	1671 25 64.34 48.00	ATCTTAAGCGTAATCCGGAACATCGTATGGGTAGTCTGGCTTGTTACTCGATTGTTCC	ATCTTAAGCGTAATCCGGAACATCGTATGGGTA	GTCTGGCTTGTTACTCGATTGTTCC	1545
19.469	1734	298 22 65.84 59.09	CATATCGACGACGACGACAAGCATATGCTCGAGGCCACGGGTATAACTGCTGGTG	CATATCGACGACGACGACAAGCATATGCTCGAG	GCCACGGGTATAACTGCTGGTG	1605 24 63.79 45.83	ATCTTAAGCGTAATCCGGAACATCGTATGGGTAACCAGAATCCCCATCATCTTCTTC	ATCTTAAGCGTAATCCGGAACATCGTATGGGTA	ACCAGAATCCCCATCATCTTCTTC	1308
19.4889	1755	244 20 65.42 55.00	CATATCGACGACGACGACAAGCATATGCTCGAGACGGCATTAACGGCAGCAAC	CATATCGACGACGACGACAAGCATATGCTCGAG	ACGGCATTAACGGCAGCAAC	1749 24 63.42 41.67	ATCTTAAGCGTAATCCGGAACATCGTATGGGTACATCCCTTGAGTCAATTCAACCAT	ATCTTAAGCGTAATCCGGAACATCGTATGGGTA	CATCCCTTGAGTCAATTCAACCAT	1506
19.494	1680	202 24 65.56 45.83	CATATCGACGACGACGACAAGCATATGCTCGAGTCGTCATGCATTGGTAGTGGGTTA	CATATCGACGACGACGACAAGCATATGCTCGAG	TCGTCATGCATTGGTAGTGGGTTA	1617 24 64.24 33.33	ATCTTAAGCGTAATCCGGAACATCGTATGGGTATTCCATTGCTTGCAATTCAAAATC	ATCTTAAGCGTAATCCGGAACATCGTATGGGTA	TTCCATTGCTTGCAATTCAAAATC	1416
19.5022	2016	214 19 64.98 57.89	CATATCGACGACGACGACAAGCATATGCTCGAGGCTGCCAAATTGGGTGCTG	CATATCGACGACGACGACAAGCATATGCTCGAG	GCTGCCAAATTGGGTGCTG	1947 20 63.83 50.00	ATCTTAAGCGTAATCCGGAACATCGTATGGGTACCAAACCAATACCGCCACAA	ATCTTAAGCGTAATCCGGAACATCGTATGGGTA	CCAAACCAATACCGCCACAA	1734
19.508	1530	142 23 64.74 47.83	CATATCGACGACGACGACAAGCATATGCTCGAGTCTTTGGTTGGATTCTGGAGTGC	CATATCGACGACGACGACAAGCATATGCTCGAG	TCTTTGGTTGGATTCTGGAGTGC	1503 23 63.93 39.13	ATCTTAAGCGTAATCCGGAACATCGTATGGGTATGCAGTTTGATTTGGCAGAACAT	ATCTTAAGCGTAATCCGGAACATCGTATGGGTA	TGCAGTTTGATTTGGCAGAACAT	1362
19.5307	1542	130 21 64.93 47.62	CATATCGACGACGACGACAAGCATATGCTCGAGTGGGTTGGATGGGATGAATTG	CATATCGACGACGACGACAAGCATATGCTCGAG	TGGGTTGGATGGGATGAATTG	1443 25 64.71 44.00	ATCTTAAGCGTAATCCGGAACATCGTATGGGTACGCACTGTATTCGTCATCTCTTTCA	ATCTTAAGCGTAATCCGGAACATCGTATGGGTA	CGCACTGTATTCGTCATCTCTTTCA	1314
19.5392	1530	157 20 63.09 55.00	CATATCGACGACGACGACAAGCATATGCTCGAGGGAGCCAAATTCCGGTTCTC	CATATCGACGACGACGACAAGCATATGCTCGAG	GGAGCCAAATTCCGGTTCTC	1491 24 64.55 50.00	ATCTTAAGCGTAATCCGGAACATCGTATGGGTACTCAGCATCATCGACAACTTCTCC	ATCTTAAGCGTAATCCGGAACATCGTATGGGTA	CTCAGCATCATCGACAACTTCTCC	1335
19.5401	2070	412 22 62.68 50.00	CATATCGACGACGACGACAAGCATATGCTCGAGGGTCACGATGAATCCACAACTG	CATATCGACGACGACGACAAGCATATGCTCGAG	GGTCACGATGAATCCACAACTG	2049 20 65.41 55.00	ATCTTAAGCGTAATCCGGAACATCGTATGGGTAAGCTGCAACGGCACACAAGA	ATCTTAAGCGTAATCCGGAACATCGTATGGGTA	AGCTGCAACGGCACACAAGA	1638
19.5406	1326	154 20 64.80 50.00	CATATCGACGACGACGACAAGCATATGCTCGAGTCATCGCGGAATAACCAGCA	CATATCGACGACGACGACAAGCATATGCTCGAG	TCATCGCGGAATAACCAGCA	1299 24 64.29 37.50	ATCTTAAGCGTAATCCGGAACATCGTATGGGTAAACATCATCAACAATTGGCTTTGC	ATCTTAAGCGTAATCCGGAACATCGTATGGGTA	AACATCATCAACAATTGGCTTTGC	1146
19.5535	1458	154 20 65.23 50.00	CATATCGACGACGACGACAAGCATATGCTCGAGGCAAATTTGGCCAACGCCTA	CATATCGACGACGACGACAAGCATATGCTCGAG	GCAAATTTGGCCAACGCCTA	1443 20 64.33 60.00	ATCTTAAGCGTAATCCGGAACATCGTATGGGTAACCACCCAGCTCAACCTCGT	ATCTTAAGCGTAATCCGGAACATCGTATGGGTA	ACCACCCAGCTCAACCTCGT	1290
19.555	828	124 22 65.74 45.45	CATATCGACGACGACGACAAGCATATGCTCGAGTGGAAATTCGGTTTAGCCGTCA	CATATCGACGACGACGACAAGCATATGCTCGAG	TGGAAATTCGGTTTAGCCGTCA	801 25 63.69 32.00	ATCTTAAGCGTAATCCGGAACATCGTATGGGTATCTTTTGCAATCATCATCACAATCA	ATCTTAAGCGTAATCCGGAACATCGTATGGGTA	TCTTTTGCAATCATCATCACAATCA	678
19.5632	852	166 21 65.28 52.38	CATATCGACGACGACGACAAGCATATGCTCGAGTCGGAATATGGGTGCAACGAG	CATATCGACGACGACGACAAGCATATGCTCGAG	TCGGAATATGGGTGCAACGAG	789 20 64.39 60.00	ATCTTAAGCGTAATCCGGAACATCGTATGGGTAAAACGGGGTGCTAGGTGGTG	ATCTTAAGCGTAATCCGGAACATCGTATGGGTA	AAACGGGGTGCTAGGTGGTG	624
19.5672	1443	211 20 64.52 55.00	CATATCGACGACGACGACAAGCATATGCTCGAGGTGGCAGCCTTCCAATGGTT	CATATCGACGACGACGACAAGCATATGCTCGAG	GTGGCAGCCTTCCAATGGTT	1410 22 65.03 50.00	ATCTTAAGCGTAATCCGGAACATCGTATGGGTAAGACCCATCAGCAACACCATCA	ATCTTAAGCGTAATCCGGAACATCGTATGGGTA	AGACCCATCAGCAACACCATCA	1200
19.6055	2442	160 25 64.99 48.00	CATATCGACGACGACGACAAGCATATGCTCGAGACGAAGAACTTGACTCCCAGTGTTG	CATATCGACGACGACGACAAGCATATGCTCGAG	ACGAAGAACTTGACTCCCAGTGTTG	1269 23 64.48 43.48	ATCTTAAGCGTAATCCGGAACATCGTATGGGTACAACAAACGTGCTTCTTGATGGA	ATCTTAAGCGTAATCCGGAACATCGTATGGGTA	CAACAAACGTGCTTCTTGATGGA	1110
19.6138	2193	229 20 65.15 60.00	CATATCGACGACGACGACAAGCATATGCTCGAGGTTGGGCCATCACCTTCTGC	CATATCGACGACGACGACAAGCATATGCTCGAG	GTTGGGCCATCACCTTCTGC	1938 21 64.39 52.38	ATCTTAAGCGTAATCCGGAACATCGTATGGGTATTCTTCTTCCCCGTCGACCTT	ATCTTAAGCGTAATCCGGAACATCGTATGGGTA	TTCTTCTTCCCCGTCGACCTT	1710
19.6139	1617	169 20 65.29 55.00	CATATCGACGACGACGACAAGCATATGCTCGAGATCCCCACCCGGTTTGAAAG	CATATCGACGACGACGACAAGCATATGCTCGAG	ATCCCCACCCGGTTTGAAAG	1521 21 64.42 52.38	ATCTTAAGCGTAATCCGGAACATCGTATGGGTAAGCGGGATGTCCACATGAAAC	ATCTTAAGCGTAATCCGGAACATCGTATGGGTA	AGCGGGATGTCCACATGAAAC	1353
19.6173	1008	121 21 64.99 52.38	CATATCGACGACGACGACAAGCATATGCTCGAGTCATCCATACGCTCAGCACCA	CATATCGACGACGACGACAAGCATATGCTCGAG	TCATCCATACGCTCAGCACCA	933 23 65.23 52.17	ATCTTAAGCGTAATCCGGAACATCGTATGGGTAGACTTTCTTGTCAGGCTGCTCCA	ATCTTAAGCGTAATCCGGAACATCGTATGGGTA	GACTTTCTTGTCAGGCTGCTCCA	813
19.6224	1494	181 19 64.36 63.16	CATATCGACGACGACGACAAGCATATGCTCGAGCGAGCAGCAAGAGGGGTTG	CATATCGACGACGACGACAAGCATATGCTCGAG	CGAGCAGCAAGAGGGGTTG	1416 20 64.33 60.00	ATCTTAAGCGTAATCCGGAACATCGTATGGGTAAGGGCACGAGTGGGAGTTGT	ATCTTAAGCGTAATCCGGAACATCGTATGGGTA	AGGGCACGAGTGGGAGTTGT	1236
19.6465	1314	106 20 64.56 60.00	CATATCGACGACGACGACAAGCATATGCTCGAGGCACCAGCAGCAGCAGAATC	CATATCGACGACGACGACAAGCATATGCTCGAG	GCACCAGCAGCAGCAGAATC	1224 26 64.97 50.00	ATCTTAAGCGTAATCCGGAACATCGTATGGGTAAAGGGTACTTCTGACCAGAGTGGATG	ATCTTAAGCGTAATCCGGAACATCGTATGGGTA	AAGGGTACTTCTGACCAGAGTGGATG	1119
19.651	1590	247 20 64.84 60.00	CATATCGACGACGACGACAAGCATATGCTCGAGGCCGTAGGGGAAATGTCGTG	CATATCGACGACGACGACAAGCATATGCTCGAG	GCCGTAGGGGAAATGTCGTG	1587 25 64.86 36.00	ATCTTAAGCGTAATCCGGAACATCGTATGGGTATTTGAATGCATGTACCGATTGATTG	ATCTTAAGCGTAATCCGGAACATCGTATGGGTA	TTTGAATGCATGTACCGATTGATTG	1341
19.654	828	124 22 65.74 45.45	CATATCGACGACGACGACAAGCATATGCTCGAGTGGAAATTCGGTTTAGCCGTCA	CATATCGACGACGACGACAAGCATATGCTCGAG	TGGAAATTCGGTTTAGCCGTCA	801 25 63.69 32.00	ATCTTAAGCGTAATCCGGAACATCGTATGGGTATCTTTTGCAATCATCATCACAATCA	ATCTTAAGCGTAATCCGGAACATCGTATGGGTA	TCTTTTGCAATCATCATCACAATCA	678
19.6578	1644	163 23 65.09 43.48	CATATCGACGACGACGACAAGCATATGCTCGAGTCGCTGGAATTTGATATGGTTGG	CATATCGACGACGACGACAAGCATATGCTCGAG	TCGCTGGAATTTGATATGGTTGG	1611 20 65.53 55.00	ATCTTAAGCGTAATCCGGAACATCGTATGGGTAAAGGGCCAAGGCAACAATCC	ATCTTAAGCGTAATCCGGAACATCGTATGGGTA	AAGGGCCAAGGCAACAATCC	1449
19.6656	1566	160 20 65.70 60.00	CATATCGACGACGACGACAAGCATATGCTCGAGGTGGCATCAGCCATGGGAGT	CATATCGACGACGACGACAAGCATATGCTCGAG	GTGGCATCAGCCATGGGAGT	1527 22 63.84 59.09	ATCTTAAGCGTAATCCGGAACATCGTATGGGTAGGACCCGTAGGTATGGTCTTGG	ATCTTAAGCGTAATCCGGAACATCGTATGGGTA	GGACCCGTAGGTATGGTCTTGG	1368
19.6854	1644	115 18 65.90 66.67	CATATCGACGACGACGACAAGCATATGCTCGAGGCCAAGGCTGCCCCAACT	CATATCGACGACGACGACAAGCATATGCTCGAG	GCCAAGGCTGCCCCAACT	1431 21 64.59 52.38	ATCTTAAGCGTAATCCGGAACATCGTATGGGTAGGCAGCCAATGGGTTGTATTG	ATCTTAAGCGTAATCCGGAACATCGTATGGGTA	GGCAGCCAATGGGTTGTATTG	1317
19.6937	1731	151 24 65.23 41.67	CATATCGACGACGACGACAAGCATATGCTCGAGACCGATCATGAAATGGAAACCTTG	CATATCGACGACGACGACAAGCATATGCTCGAG	ACCGATCATGAAATGGAAACCTTG	1692 20 65.42 55.00	ATCTTAAGCGTAATCCGGAACATCGTATGGGTATGGCATAAGCGCAGCCTCTT	ATCTTAAGCGTAATCCGGAACATCGTATGGGTA	TGGCATAAGCGCAGCCTCTT	1542
19.6992	1515	169 24 63.82 37.50	CATATCGACGACGACGACAAGCATATGCTCGAGTCAAGTCCAATTTATTTCCCAGCA	CATATCGACGACGACGACAAGCATATGCTCGAG	TCAAGTCCAATTTATTTCCCAGCA	1512 20 65.02 50.00	ATCTTAAGCGTAATCCGGAACATCGTATGGGTATTGTTTGGGTGGGGATTTCG	ATCTTAAGCGTAATCCGGAACATCGTATGGGTA	TTGTTTGGGTGGGGATTTCG	1344
19.6993	1767	100 20 65.50 55.00	CATATCGACGACGACGACAAGCATATGCTCGAGAACGCCCCACCAAAGAAAGG	CATATCGACGACGACGACAAGCATATGCTCGAG	AACGCCCCACCAAAGAAAGG	1707 22 63.58 45.45	ATCTTAAGCGTAATCCGGAACATCGTATGGGTATTCGGCAACTTCTTGTTTGACC	ATCTTAAGCGTAATCCGGAACATCGTATGGGTA	TTCGGCAACTTCTTGTTTGACC	1608
19.7001	1488	109 21 63.26 52.38	CATATCGACGACGACGACAAGCATATGCTCGAGTCATCCGTGGTTGGACTTCAC	CATATCGACGACGACGACAAGCATATGCTCGAG	TCATCCGTGGTTGGACTTCAC	1443 22 64.59 40.91	ATCTTAAGCGTAATCCGGAACATCGTATGGGTATTCGGCAACCATTTGTTGTTGT	ATCTTAAGCGTAATCCGGAACATCGTATGGGTA	TTCGGCAACCATTTGTTGTTGT	1335
19.7056	1650	178 22 63.37 40.91	CATATCGACGACGACGACAAGCATATGCTCGAGTCATTGGTTGGTGTCATTGGAA	CATATCGACGACGACGACAAGCATATGCTCGAG	TCATTGGTTGGTGTCATTGGAA	1602 22 63.24 50.00	ATCTTAAGCGTAATCCGGAACATCGTATGGGTAAGGAGGTTCAGGACGTTGTTGA	ATCTTAAGCGTAATCCGGAACATCGTATGGGTA	AGGAGGTTCAGGACGTTGTTGA	1425
19.7258	972	106 20 65.64 60.00	CATATCGACGACGACGACAAGCATATGCTCGAGGGGTTGGAGGCCAGTGTTCA	CATATCGACGACGACGACAAGCATATGCTCGAG	GGGTTGGAGGCCAGTGTTCA	948 20 64.10 55.00	ATCTTAAGCGTAATCCGGAACATCGTATGGGTACCCGCCCAAAGACTTTCTTG	ATCTTAAGCGTAATCCGGAACATCGTATGGGTA	CCCGCCCAAAGACTTTCTTG	843
19.7565	1698	259 20 64.80 60.00	CATATCGACGACGACGACAAGCATATGCTCGAGGCTGGTCCTGCTGGAATGGT	CATATCGACGACGACGACAAGCATATGCTCGAG	GCTGGTCCTGCTGGAATGGT	1668 20 63.15 50.00	ATCTTAAGCGTAATCCGGAACATCGTATGGGTACCACAATGGTGCCTTTTCGT	ATCTTAAGCGTAATCCGGAACATCGTATGGGTA	CCACAATGGTGCCTTTTCGT	1410
19.7566	1716	133 26 63.23 46.15	CATATCGACGACGACGACAAGCATATGCTCGAGTCTTTCCATAGAGCAGACGGTAAGAC	CATATCGACGACGACGACAAGCATATGCTCGAG	TCTTTCCATAGAGCAGACGGTAAGAC	1641 22 63.12 45.45	ATCTTAAGCGTAATCCGGAACATCGTATGGGTACAAAGCCAAAAGTTCTGGATCG	ATCTTAAGCGTAATCCGGAACATCGTATGGGTA	CAAAGCCAAAAGTTCTGGATCG	1509
19.781	2178	145 22 64.76 54.55	CATATCGACGACGACGACAAGCATATGCTCGAGGCAACAGCCGGTAGATCTGTCA	CATATCGACGACGACGACAAGCATATGCTCGAG	GCAACAGCCGGTAGATCTGTCA	2031 21 65.29 47.62	ATCTTAAGCGTAATCCGGAACATCGTATGGGTATGGGTGTTCATTTTGCCAAGC	ATCTTAAGCGTAATCCGGAACATCGTATGGGTA	TGGGTGTTCATTTTGCCAAGC	1887
19.84	1074	208 20 65.54 60.00	CATATCGACGACGACGACAAGCATATGCTCGAGGCTGGCCCGGTAATGTCCTT	CATATCGACGACGACGACAAGCATATGCTCGAG	GCTGGCCCGGTAATGTCCTT	1047 23 64.35 47.83	ATCTTAAGCGTAATCCGGAACATCGTATGGGTATCTTGATCCCGCATAAACGGTAG	ATCTTAAGCGTAATCCGGAACATCGTATGGGTA	TCTTGATCCCGCATAAACGGTAG	840
19.852	1095	262 21 64.39 47.62	CATATCGACGACGACGACAAGCATATGCTCGAGAATGCCACTTGTCCGAATTGC	CATATCGACGACGACGACAAGCATATGCTCGAG	AATGCCACTTGTCCGAATTGC	993 24 64.49 45.83	ATCTTAAGCGTAATCCGGAACATCGTATGGGTATGCACCTAATTGAGCAGCATTACC	ATCTTAAGCGTAATCCGGAACATCGTATGGGTA	TGCACCTAATTGAGCAGCATTACC	732
19.886	4194	130 22 64.85 50.00	CATATCGACGACGACGACAAGCATATGCTCGAGGCAACTGGATTTGTTCCCCAAC	CATATCGACGACGACGACAAGCATATGCTCGAG	GCAACTGGATTTGTTCCCCAAC	1779 20 63.39 55.00	ATCTTAAGCGTAATCCGGAACATCGTATGGGTAACCGTCTGGCTTGGATTGTG	ATCTTAAGCGTAATCCGGAACATCGTATGGGTA	ACCGTCTGGCTTGGATTGTG	1650
19.996	1854	178 23 64.51 47.83	CATATCGACGACGACGACAAGCATATGCTCGAGGGTCTTCAAAGACATGGGTGGAA	CATATCGACGACGACGACAAGCATATGCTCGAG	GGTCTTCAAAGACATGGGTGGAA	1833 22 66.12 45.45	ATCTTAAGCGTAATCCGGAACATCGTATGGGTACACCCGTTTGAAATTCCGATCA	ATCTTAAGCGTAATCCGGAACATCGTATGGGTA	CACCCGTTTGAAATTCCGATCA	1656
19.1392 (1)	2214	106 23 65.62 47.83	CATATCGACGACGACGACAAGCATATGCTCGAGGTGACAAATGGGGAACACAAACG	CATATCGACGACGACGACAAGCATATGCTCGAG	GTGACAAATGGGGAACACAAACG	906 21 64.78 47.62	ATCTTAAGCGTAATCCGGAACATCGTATGGGTAAAAACGAACGGCCCCTATTGA	ATCTTAAGCGTAATCCGGAACATCGTATGGGTA	AAAACGAACGGCCCCTATTGA	801
19.1392 (2)	2214	943 23 64.56 43.48	CATATCGACGACGACGACAAGCATATGCTCGAGTGGTGGGTCCAGAAATTATTCCA	CATATCGACGACGACGACAAGCATATGCTCGAG	TGGTGGGTCCAGAAATTATTCCA	2181 20 65.38 60.00	ATCTTAAGCGTAATCCGGAACATCGTATGGGTAAATACCACCACCGCCACTGC	ATCTTAAGCGTAATCCGGAACATCGTATGGGTA	AATACCACCACCGCCACTGC	1239
19.1392 (2)	2214	943 23 64.56 43.48	CATATCGACGACGACGACAAGCATATGCTCGAGTGGTGGGTCCAGAAATTATTCCA	CATATCGACGACGACGACAAGCATATGCTCGAG	TGGTGGGTCCAGAAATTATTCCA	2181 20 65.38 60.00	ATCTTAAGCGTAATCCGGAACATCGTATGGGTAAATACCACCACCGCCACTGC	ATCTTAAGCGTAATCCGGAACATCGTATGGGTA	AATACCACCACCGCCACTGC	1239
19.1783 (1)	4455	205 20 64.33 50.00	CATATCGACGACGACGACAAGCATATGCTCGAGCGAACTTTGCAACCCGATGA	CATATCGACGACGACGACAAGCATATGCTCGAG	CGAACTTTGCAACCCGATGA	1527 22 63.39 45.45	ATCTTAAGCGTAATCCGGAACATCGTATGGGTAACCATCACCATCACCATCAACA	ATCTTAAGCGTAATCCGGAACATCGTATGGGTA	ACCATCACCATCACCATCAACA	1323
19.1783 (2)	4455	1657 24 63.75 41.67	CATATCGACGACGACGACAAGCATATGCTCGAGGCACAATCCAAAGACTTGGAAGAA	CATATCGACGACGACGACAAGCATATGCTCGAG	GCACAATCCAAAGACTTGGAAGAA	2886 25 63.60 40.00	ATCTTAAGCGTAATCCGGAACATCGTATGGGTAATCCATAAATGACATAGGGGCATGT	ATCTTAAGCGTAATCCGGAACATCGTATGGGTA	ATCCATAAATGACATAGGGGCATGT	1230
19.1783 (3)	4455	2890 23 63.85 43.48	CATATCGACGACGACGACAAGCATATGCTCGAGACCCCTATGGGGAGAATTTTGAA	CATATCGACGACGACGACAAGCATATGCTCGAG	ACCCCTATGGGGAGAATTTTGAA	4449 25 63.11 44.00	ATCTTAAGCGTAATCCGGAACATCGTATGGGTACCCAGTAGCTTCTTGGAAATCTTGT	ATCTTAAGCGTAATCCGGAACATCGTATGGGTA	CCCAGTAGCTTCTTGGAAATCTTGT	1560
19.1800 (IPF7397)	1329	184 25 64.69 48.00	CATATCGACGACGACGACAAGCATATGCTCGAGCCACCGATAGTTAGTCCACCAAATG	CATATCGACGACGACGACAAGCATATGCTCGAG	CCACCGATAGTTAGTCCACCAAATG	1305 23 63.85 47.83	ATCTTAAGCGTAATCCGGAACATCGTATGGGTAACAGATTCCTCCACCCCACATTA	ATCTTAAGCGTAATCCGGAACATCGTATGGGTA	ACAGATTCCTCCACCCCACATTA	1122
19.1814 (1)	5784	130 23 63.20 43.48	CATATCGACGACGACGACAAGCATATGCTCGAGTCCAAATTATTATCGGCCACTCC	CATATCGACGACGACGACAAGCATATGCTCGAG	TCCAAATTATTATCGGCCACTCC	1536 25 65.18 44.00	ATCTTAAGCGTAATCCGGAACATCGTATGGGTAAGACGACATAGGTGATGCAAATGCT	ATCTTAAGCGTAATCCGGAACATCGTATGGGTA	AGACGACATAGGTGATGCAAATGCT	1407
19.1814 (2)	5784	2659 20 64.23 50.00	CATATCGACGACGACGACAAGCATATGCTCGAGGCTGCCATGCAATGTTGTGA	CATATCGACGACGACGACAAGCATATGCTCGAG	GCTGCCATGCAATGTTGTGA	3900 20 66.32 55.00	ATCTTAAGCGTAATCCGGAACATCGTATGGGTACCAAGTCAATGCCCCATCCA	ATCTTAAGCGTAATCCGGAACATCGTATGGGTA	CCAAGTCAATGCCCCATCCA	1242
19.1814 (3)	5784	4186 21 63.39 47.62	CATATCGACGACGACGACAAGCATATGCTCGAGGCAGTGAATTTGGCCATGAGA	CATATCGACGACGACGACAAGCATATGCTCGAG	GCAGTGAATTTGGCCATGAGA	5445 22 64.49 54.55	ATCTTAAGCGTAATCCGGAACATCGTATGGGTACTCAAACCTAACCCCACCAGGA	ATCTTAAGCGTAATCCGGAACATCGTATGGGTA	CTCAAACCTAACCCCACCAGGA	1260
19.1844	2127	175 20 62.25 50.00	CATATCGACGACGACGACAAGCATATGCTCGAGATCACCACCAACATCGACCA	CATATCGACGACGACGACAAGCATATGCTCGAG	ATCACCACCAACATCGACCA	2028 20 65.94 55.00	ATCTTAAGCGTAATCCGGAACATCGTATGGGTATGGATGGCCACAGGTCACAA	ATCTTAAGCGTAATCCGGAACATCGTATGGGTA	TGGATGGCCACAGGTCACAA	1854
19.2669 (1)	4344	271 20 64.21 55.00	CATATCGACGACGACGACAAGCATATGCTCGAGCGACCATTACAACGCCTCCA	CATATCGACGACGACGACAAGCATATGCTCGAG	CGACCATTACAACGCCTCCA	2028 22 64.29 54.55	ATCTTAAGCGTAATCCGGAACATCGTATGGGTAGTTTCTGGGTTCCAGGATCTCG	ATCTTAAGCGTAATCCGGAACATCGTATGGGTA	GTTTCTGGGTTCCAGGATCTCG	1758
19.2669 (2)	4344	2260 21 65.55 61.90	CATATCGACGACGACGACAAGCATATGCTCGAGGCTGACTCCACGGAGACGTTG	CATATCGACGACGACGACAAGCATATGCTCGAG	GCTGACTCCACGGAGACGTTG	3960 20 65.78 50.00	ATCTTAAGCGTAATCCGGAACATCGTATGGGTATGCAAGCATTTCGCAAGCAG	ATCTTAAGCGTAATCCGGAACATCGTATGGGTA	TGCAAGCATTTCGCAAGCAG	1701
19.3060 (IPF9278)	828	193 25 62.82 44.00	CATATCGACGACGACGACAAGCATATGCTCGAGAAGGGTAAACCTGAGCAGATTATGG	CATATCGACGACGACGACAAGCATATGCTCGAG	AAGGGTAAACCTGAGCAGATTATGG	798 24 63.55 41.67	ATCTTAAGCGTAATCCGGAACATCGTATGGGTAACTTCTCAAAACGCTGACTCCAAA	ATCTTAAGCGTAATCCGGAACATCGTATGGGTA	ACTTCTCAAAACGCTGACTCCAAA	606
19.3225 (1)	3069	112 24 65.44 41.67	CATATCGACGACGACGACAAGCATATGCTCGAGCACACCGTTTTTGCTTCTTCATCA	CATATCGACGACGACGACAAGCATATGCTCGAG	CACACCGTTTTTGCTTCTTCATCA	1545 21 64.39 57.14	ATCTTAAGCGTAATCCGGAACATCGTATGGGTACCCTTCCCAAGTCCAAAGAGC	ATCTTAAGCGTAATCCGGAACATCGTATGGGTA	CCCTTCCCAAGTCCAAAGAGC	1434
19.3225 (2)	3069	1675 20 64.55 60.00	CATATCGACGACGACGACAAGCATATGCTCGAGGGTGGTGGAAGTGCCCTTGT	CATATCGACGACGACGACAAGCATATGCTCGAG	GGTGGTGGAAGTGCCCTTGT	3000 22 64.40 50.00	ATCTTAAGCGTAATCCGGAACATCGTATGGGTATTGCTCTTGCTCTTGCTCTTGC	ATCTTAAGCGTAATCCGGAACATCGTATGGGTA	TTGCTCTTGCTCTTGCTCTTGC	1326
19.323 (1)	4440	217 20 64.52 60.00	CATATCGACGACGACGACAAGCATATGCTCGAGCAGGGTCGTCCCATCACTCA	CATATCGACGACGACGACAAGCATATGCTCGAG	CAGGGTCGTCCCATCACTCA	1863 20 62.95 55.00	ATCTTAAGCGTAATCCGGAACATCGTATGGGTAGCCTGCACGTTTATCCAAGC	ATCTTAAGCGTAATCCGGAACATCGTATGGGTA	GCCTGCACGTTTATCCAAGC	1647
19.323 (2)	4440	2146 21 64.94 57.14	CATATCGACGACGACGACAAGCATATGCTCGAGCCCGACGAAGCAGCCTTAGTT	CATATCGACGACGACGACAAGCATATGCTCGAG	CCCGACGAAGCAGCCTTAGTT	3984 20 64.28 55.00	ATCTTAAGCGTAATCCGGAACATCGTATGGGTAATCCACGTCTGCTGGCTTGA	ATCTTAAGCGTAATCCGGAACATCGTATGGGTA	ATCCACGTCTGCTGGCTTGA	1839
19.3298 (1)	6765	166 22 64.30 54.55	CATATCGACGACGACGACAAGCATATGCTCGAGCAAAGGCAGTCTTCGTCACACC	CATATCGACGACGACGACAAGCATATGCTCGAG	CAAAGGCAGTCTTCGTCACACC	1695 21 65.34 57.14	ATCTTAAGCGTAATCCGGAACATCGTATGGGTAGAACGACCGATTTGCCTCTCC	ATCTTAAGCGTAATCCGGAACATCGTATGGGTA	GAACGACCGATTTGCCTCTCC	1530
19.3298 (2)	6765	1714 21 63.40 52.38	CATATCGACGACGACGACAAGCATATGCTCGAGCAGATGGACCTGCATCATCGT	CATATCGACGACGACGACAAGCATATGCTCGAG	CAGATGGACCTGCATCATCGT	3228 20 65.54 60.00	ATCTTAAGCGTAATCCGGAACATCGTATGGGTACCCGGGTAACGTGGTCATTG	ATCTTAAGCGTAATCCGGAACATCGTATGGGTA	CCCGGGTAACGTGGTCATTG	1515
19.3298 (3)	6765	3253 23 64.94 43.48	CATATCGACGACGACGACAAGCATATGCTCGAGACGTCAACGGAAAATTGGACAGA	CATATCGACGACGACGACAAGCATATGCTCGAG	ACGTCAACGGAAAATTGGACAGA	4893 24 63.93 37.50	ATCTTAAGCGTAATCCGGAACATCGTATGGGTATTTCGAAGGTTTTACTTGCACCAA	ATCTTAAGCGTAATCCGGAACATCGTATGGGTA	TTTCGAAGGTTTTACTTGCACCAA	1641
19.3628 (1)	2499	118 21 64.40 52.38	CATATCGACGACGACGACAAGCATATGCTCGAGGCCGTGTTGACAGTTGATGGA	CATATCGACGACGACGACAAGCATATGCTCGAG	GCCGTGTTGACAGTTGATGGA	1020 20 63.78 60.00	ATCTTAAGCGTAATCCGGAACATCGTATGGGTAAGCTGCAGGGTTGACTGGTG	ATCTTAAGCGTAATCCGGAACATCGTATGGGTA	AGCTGCAGGGTTGACTGGTG	903
19.3628 (2)	2499	1072 20 64.69 55.00	CATATCGACGACGACGACAAGCATATGCTCGAGCCATCGGGTTGGGAACAAAG	CATATCGACGACGACGACAAGCATATGCTCGAG	CCATCGGGTTGGGAACAAAG	2385 22 63.35 45.45	ATCTTAAGCGTAATCCGGAACATCGTATGGGTAGGGCAATTGATTAGCTTCACCA	ATCTTAAGCGTAATCCGGAACATCGTATGGGTA	GGGCAATTGATTAGCTTCACCA	1314
19.3910 (IPF15494)	1242	91 20 62.77 55.00	CATATCGACGACGACGACAAGCATATGCTCGAGGACTCGTGCCCCATTGATTC	CATATCGACGACGACGACAAGCATATGCTCGAG	GACTCGTGCCCCATTGATTC	1095 20 65.39 65.00	ATCTTAAGCGTAATCCGGAACATCGTATGGGTAGCCACCACTGACAGCACGAC	ATCTTAAGCGTAATCCGGAACATCGTATGGGTA	GCCACCACTGACAGCACGAC	1005
19.3988 (IPF9655)	1728	139 20 63.76 55.00	CATATCGACGACGACGACAAGCATATGCTCGAGCCTCGTCCAACCCCAATTTC	CATATCGACGACGACGACAAGCATATGCTCGAG	CCTCGTCCAACCCCAATTTC	1710 24 62.43 41.67	ATCTTAAGCGTAATCCGGAACATCGTATGGGTATGCTAAAGTTGACGAGTTTCTCCA	ATCTTAAGCGTAATCCGGAACATCGTATGGGTA	TGCTAAAGTTGACGAGTTTCTCCA	1572
19.3994 (IPF9647)	1026	178 25 62.62 40.00	CATATCGACGACGACGACAAGCATATGCTCGAGTTAACTTCAGAAGCTCCCAATCTCA	CATATCGACGACGACGACAAGCATATGCTCGAG	TTAACTTCAGAAGCTCCCAATCTCA	1002 22 63.55 45.45	ATCTTAAGCGTAATCCGGAACATCGTATGGGTATGGGAACCCAACACCTTTAACA	ATCTTAAGCGTAATCCGGAACATCGTATGGGTA	TGGGAACCCAACACCTTTAACA	825
19.4668 (IPF7409)	2154	247 21 65.02 52.38	CATATCGACGACGACGACAAGCATATGCTCGAGGGGTTTGTTGGTTCCCCGTTA	CATATCGACGACGACGACAAGCATATGCTCGAG	GGGTTTGTTGGTTCCCCGTTA	2097 20 63.64 55.00	ATCTTAAGCGTAATCCGGAACATCGTATGGGTACCCCCATTGAGTTTCCCATC	ATCTTAAGCGTAATCCGGAACATCGTATGGGTA	CCCCCATTGAGTTTCCCATC	1851
19.4738 (IPF10645)	1677	118 22 63.78 45.45	CATATCGACGACGACGACAAGCATATGCTCGAGCCACGATCAAATCGAACTTTGG	CATATCGACGACGACGACAAGCATATGCTCGAG	CCACGATCAAATCGAACTTTGG	1617 22 63.91 50.00	ATCTTAAGCGTAATCCGGAACATCGTATGGGTATTGAGGCAGAGGTGACTTTTCG	ATCTTAAGCGTAATCCGGAACATCGTATGGGTA	TTGAGGCAGAGGTGACTTTTCG	1500
19.4893 (1) (IPF12282)	4326	241 23 65.64 47.83 8.00	CATATCGACGACGACGACAAGCATATGCTCGAGGAGAAACTTGCCGTGATCACCAA	CATATCGACGACGACGACAAGCATATGCTCGAG	GAGAAACTTGCCGTGATCACCAA	2076 22 63.73 50.00	ATCTTAAGCGTAATCCGGAACATCGTATGGGTAAGCTTGACCACTTGGTTGTTGC	ATCTTAAGCGTAATCCGGAACATCGTATGGGTA	AGCTTGACCACTTGGTTGTTGC	1836
19.4893 (2) (IPF12282)	4326	2218 21 65.38 61.90	CATATCGACGACGACGACAAGCATATGCTCGAGGCGGGCTCTACATCAGTCACG	CATATCGACGACGACGACAAGCATATGCTCGAG	GCGGGCTCTACATCAGTCACG	4161 20 64.71 60.00	ATCTTAAGCGTAATCCGGAACATCGTATGGGTAGTCGTCGTCGTCGTCGTCAT	ATCTTAAGCGTAATCCGGAACATCGTATGGGTA	GTCGTCGTCGTCGTCGTCAT	1944
19.5095 (1)	3957	172 20 63.67 55.00	CATATCGACGACGACGACAAGCATATGCTCGAGGCTGTGCAAGTGGCATCCTT	CATATCGACGACGACGACAAGCATATGCTCGAG	GCTGTGCAAGTGGCATCCTT	1920 21 65.93 57.14	ATCTTAAGCGTAATCCGGAACATCGTATGGGTATGCCATAGCAGCACCTGAAGC	ATCTTAAGCGTAATCCGGAACATCGTATGGGTA	TGCCATAGCAGCACCTGAAGC	1749
19.5095 (2)	3957	2236 21 64.64 57.14	CATATCGACGACGACGACAAGCATATGCTCGAGGGAGGAGTTGCTGCTGCTTTG	CATATCGACGACGACGACAAGCATATGCTCGAG	GGAGGAGTTGCTGCTGCTTTG	3945 20 64.95 50.00	ATCTTAAGCGTAATCCGGAACATCGTATGGGTATCCCGTGTTCGCCAAATCTT	ATCTTAAGCGTAATCCGGAACATCGTATGGGTA	TCCCGTGTTCGCCAAATCTT	1710
19.517 (1)	2916	103 25 64.41 44.00	CATATCGACGACGACGACAAGCATATGCTCGAGGGATTTGTCCAAGAGTTGAAAGCTG	CATATCGACGACGACGACAAGCATATGCTCGAG	GGATTTGTCCAAGAGTTGAAAGCTG	1404 23 64.10 52.17	ATCTTAAGCGTAATCCGGAACATCGTATGGGTAAACTCTCTCAACAGCACCCTTGG	ATCTTAAGCGTAATCCGGAACATCGTATGGGTA	AACTCTCTCAACAGCACCCTTGG	1302
19.517 (2)	2916	1423 23 64.04 47.83	CATATCGACGACGACGACAAGCATATGCTCGAGTGGTACGGTGAAAGAACTGACGA	CATATCGACGACGACGACAAGCATATGCTCGAG	TGGTACGGTGAAAGAACTGACGA	2748 20 66.30 55.00	ATCTTAAGCGTAATCCGGAACATCGTATGGGTATGCAACACCCCATTCCCAAG	ATCTTAAGCGTAATCCGGAACATCGTATGGGTA	TGCAACACCCCATTCCCAAG	1326
19.5244 (1)	2916	121 19 64.37 63.16	CATATCGACGACGACGACAAGCATATGCTCGAGTCCACTTGGACCCCACCTG	CATATCGACGACGACGACAAGCATATGCTCGAG	TCCACTTGGACCCCACCTG	1464 26 64.18 34.62	ATCTTAAGCGTAATCCGGAACATCGTATGGGTAAACAATCCAACCGAAAAATCCTAATG	ATCTTAAGCGTAATCCGGAACATCGTATGGGTA	AACAATCCAACCGAAAAATCCTAATG	1344
19.5244 (2)	2916	1546 24 65.29 45.83	CATATCGACGACGACGACAAGCATATGCTCGAGGTCGGGATATTTGGAGCATTAGCA	CATATCGACGACGACGACAAGCATATGCTCGAG	GTCGGGATATTTGGAGCATTAGCA	2859 25 66.28 44.00	ATCTTAAGCGTAATCCGGAACATCGTATGGGTAACCGTCGGAATTATATTCCACACCA	ATCTTAAGCGTAATCCGGAACATCGTATGGGTA	ACCGTCGGAATTATATTCCACACCA	1314
19.600 (1)	3171	133 19 65.05 57.89	CATATCGACGACGACGACAAGCATATGCTCGAGCCCAATTTTCGGGCAGCTC	CATATCGACGACGACGACAAGCATATGCTCGAG	CCCAATTTTCGGGCAGCTC	1545 21 65.10 52.38	ATCTTAAGCGTAATCCGGAACATCGTATGGGTATCCACCCGTCTCATCCTTTGA	ATCTTAAGCGTAATCCGGAACATCGTATGGGTA	TCCACCCGTCTCATCCTTTGA	1413
19.600 (2)	3171	1603 20 64.43 45.00	CATATCGACGACGACGACAAGCATATGCTCGAGGGGCGCAAAATTCGAAAGAA	CATATCGACGACGACGACAAGCATATGCTCGAG	GGGCGCAAAATTCGAAAGAA	3039 20 64.72 55.00	ATCTTAAGCGTAATCCGGAACATCGTATGGGTACCCGTCGATTGGACCATTTC	ATCTTAAGCGTAATCCGGAACATCGTATGGGTA	CCCGTCGATTGGACCATTTC	1437
19.6070 (1)	3204	187 20 65.11 55.00	CATATCGACGACGACGACAAGCATATGCTCGAGGCACACGACGCTGAAAATCG	CATATCGACGACGACGACAAGCATATGCTCGAG	GCACACGACGCTGAAAATCG	1608 22 64.67 40.91	ATCTTAAGCGTAATCCGGAACATCGTATGGGTATGGGAATTCAGCCAAATGTTCA	ATCTTAAGCGTAATCCGGAACATCGTATGGGTA	TGGGAATTCAGCCAAATGTTCA	1422
19.6070 (2)	3204	1855 22 64.92 50.00	CATATCGACGACGACGACAAGCATATGCTCGAGCTTGGCGATGCTGATATGAACG	CATATCGACGACGACGACAAGCATATGCTCGAG	CTTGGCGATGCTGATATGAACG	3102 20 64.86 50.00	ATCTTAAGCGTAATCCGGAACATCGTATGGGTAAAACACACGCTTGCCCCATT	ATCTTAAGCGTAATCCGGAACATCGTATGGGTA	AAACACACGCTTGCCCCATT	1248
19.682 (1)	3564	103 19 64.91 63.16	CATATCGACGACGACGACAAGCATATGCTCGAGCACGGGCACATTGGTCCTC	CATATCGACGACGACGACAAGCATATGCTCGAG	CACGGGCACATTGGTCCTC	1797 22 64.50 54.55	ATCTTAAGCGTAATCCGGAACATCGTATGGGTACCCCTCTGGTTCTTCAGCTTTG	ATCTTAAGCGTAATCCGGAACATCGTATGGGTA	CCCCTCTGGTTCTTCAGCTTTG	1695
19.682 (2)	3564	1867 20 65.12 60.00	CATATCGACGACGACGACAAGCATATGCTCGAGCGTGCTCCTTCATCCCAACC	CATATCGACGACGACGACAAGCATATGCTCGAG	CGTGCTCCTTCATCCCAACC	3504 20 64.55 55.00	ATCTTAAGCGTAATCCGGAACATCGTATGGGTAATCCGCGTCATCTGCATCAC	ATCTTAAGCGTAATCCGGAACATCGTATGGGTA	ATCCGCGTCATCTGCATCAC	1638
19.6861 (1) (IPF9828)	2397	139 23 64.63 43.48	CATATCGACGACGACGACAAGCATATGCTCGAGAACAAACAACAACCACGACCACA	CATATCGACGACGACGACAAGCATATGCTCGAG	AACAAACAACAACCACGACCACA	1155 24 63.65 33.33	ATCTTAAGCGTAATCCGGAACATCGTATGGGTATCGATTTTTCCATAATTCGGGTTT	ATCTTAAGCGTAATCCGGAACATCGTATGGGTA	TCGATTTTTCCATAATTCGGGTTT	1017
19.6861 (2) (IPF9828)	2397	1408 25 62.88 40.00	CATATCGACGACGACGACAAGCATATGCTCGAGGCAGAATTAGCAGCAATAGTTTGGA	CATATCGACGACGACGACAAGCATATGCTCGAG	GCAGAATTAGCAGCAATAGTTTGGA	2328 24 65.58 45.83	ATCTTAAGCGTAATCCGGAACATCGTATGGGTAAGCCAACTCCATTTCTTGTGGTTG	ATCTTAAGCGTAATCCGGAACATCGTATGGGTA	AGCCAACTCCATTTCTTGTGGTTG	921
19.7096 (1) (IPF553)	2931	157 24 64.40 50.00	CATATCGACGACGACGACAAGCATATGCTCGAGCGACTTCTACAGCGACAAGGAATG	CATATCGACGACGACGACAAGCATATGCTCGAG	CGACTTCTACAGCGACAAGGAATG	1458 21 65.12 52.38	ATCTTAAGCGTAATCCGGAACATCGTATGGGTATGCAATCGGGGTATACGCTTG	ATCTTAAGCGTAATCCGGAACATCGTATGGGTA	TGCAATCGGGGTATACGCTTG	1302
19.7096 (2) (IPF553)	2931	1474 22 64.67 40.91	CATATCGACGACGACGACAAGCATATGCTCGAGTTTGTGGCCAATGGAGAAATCA	CATATCGACGACGACGACAAGCATATGCTCGAG	TTTGTGGCCAATGGAGAAATCA	2781 23 65.17 47.83	ATCTTAAGCGTAATCCGGAACATCGTATGGGTAGGGAAGCAATGCATCAGTTTCTG	ATCTTAAGCGTAATCCGGAACATCGTATGGGTA	GGGAAGCAATGCATCAGTTTCTG	1308
19.7167 (IPF20175)	801	133 20 65.00 60.00	CATATCGACGACGACGACAAGCATATGCTCGAGAAAGCTCCAGCCCCAGTTCC	CATATCGACGACGACGACAAGCATATGCTCGAG	AAAGCTCCAGCCCCAGTTCC	795 22 65.03 50.00	ATCTTAAGCGTAATCCGGAACATCGTATGGGTAATCGTCATCCGAGTTGTCACCA	ATCTTAAGCGTAATCCGGAACATCGTATGGGTA	ATCGTCATCCGAGTTGTCACCA	663
19.7214 (IPF885)	1509	124 23 65.44 43.48	CATATCGACGACGACGACAAGCATATGCTCGAGTTTGGTGTGAATTTCGGAGCTTG	CATATCGACGACGACGACAAGCATATGCTCGAG	TTTGGTGTGAATTTCGGAGCTTG	1464 20 64.92 50.00	ATCTTAAGCGTAATCCGGAACATCGTATGGGTATTGCTCCCATTCCCAAAGGA	ATCTTAAGCGTAATCCGGAACATCGTATGGGTA	TTGCTCCCATTCCCAAAGGA	1341
19.7473 (1) (IPF2500)	2274	109 24 65.41 45.83	CATATCGACGACGACGACAAGCATATGCTCGAGCCACTTCACACATTCCCATCTTCA	CATATCGACGACGACGACAAGCATATGCTCGAG	CCACTTCACACATTCCCATCTTCA	957 25 64.77 36.00	ATCTTAAGCGTAATCCGGAACATCGTATGGGTAATTGAAATCATCGGCGTCTAAATCA	ATCTTAAGCGTAATCCGGAACATCGTATGGGTA	ATTGAAATCATCGGCGTCTAAATCA	849
19.7473 (2) (IPF2500)	2274	1075 27 64.17 33.33	CATATCGACGACGACGACAAGCATATGCTCGAGATGGGGAATATAACCAATGGGAATTTA	CATATCGACGACGACGACAAGCATATGCTCGAG	ATGGGGAATATAACCAATGGGAATTTA	2259 20 64.91 65.00	ATCTTAAGCGTAATCCGGAACATCGTATGGGTATGGAGGAGGAGGTGGTGGAG	ATCTTAAGCGTAATCCGGAACATCGTATGGGTA	TGGAGGAGGAGGTGGTGGAG	1185
19.932 (2)	5151	1501 25 65.28 40.00	CATATCGACGACGACGACAAGCATATGCTCGAGGCTGATCTTGTAATTTTGGCAACCA	CATATCGACGACGACGACAAGCATATGCTCGAG	GCTGATCTTGTAATTTTGGCAACCA	3225 20 65.89 55.00	ATCTTAAGCGTAATCCGGAACATCGTATGGGTACCCAGCATCAGCCAAAATGG	ATCTTAAGCGTAATCCGGAACATCGTATGGGTA	CCCAGCATCAGCCAAAATGG	1725
19.932 (3)	5151	3409 21 65.19 52.38	CATATCGACGACGACGACAAGCATATGCTCGAGGGCCATAATGCCAGTGAACCA	CATATCGACGACGACGACAAGCATATGCTCGAG	GGCCATAATGCCAGTGAACCA	5052 21 64.83 52.38	ATCTTAAGCGTAATCCGGAACATCGTATGGGTATACCCCTGGGCTTGATCCATT	ATCTTAAGCGTAATCCGGAACATCGTATGGGTA	TACCCCTGGGCTTGATCCATT	1644
19.936 (IPF9398)	2325	154 19 64.98 57.89	CATATCGACGACGACGACAAGCATATGCTCGAGGCCGCCAACGACTTGAATG	CATATCGACGACGACGACAAGCATATGCTCGAG	GCCGCCAACGACTTGAATG	1734 20 64.95 50.00	ATCTTAAGCGTAATCCGGAACATCGTATGGGTACCATTCCATGGGCCACATTT	ATCTTAAGCGTAATCCGGAACATCGTATGGGTA	CCATTCCATGGGCCACATTT	1581
ADH1	1305	115 22 65.23 54.55	CATATCGACGACGACGACAAGCATATGCTCGAGGGATCCACTGTGCTCCGAAAAC	CATATCGACGACGACGACAAGCATATGCTCGAG	GGATCCACTGTGCTCCGAAAAC	1227 23 65.81 43.48	ATCTTAAGCGTAATCCGGAACATCGTATGGGTAACCGACAATCTTGATTGGGCATT	ATCTTAAGCGTAATCCGGAACATCGTATGGGTA	ACCGACAATCTTGATTGGGCATT	1113
ADP1 (1)	3117	175 20 64.60 55.00	CATATCGACGACGACGACAAGCATATGCTCGAGCCAGGACATGGCAATGATGG	CATATCGACGACGACGACAAGCATATGCTCGAG	CCAGGACATGGCAATGATGG	1476 20 64.59 55.00	ATCTTAAGCGTAATCCGGAACATCGTATGGGTAACGCGGAAGCCTTAACAACG	ATCTTAAGCGTAATCCGGAACATCGTATGGGTA	ACGCGGAAGCCTTAACAACG	1302
ADP1 (2)	3117	1882 20 63.38 55.00	CATATCGACGACGACGACAAGCATATGCTCGAGCCACCGGGTTACAACATTGC	CATATCGACGACGACGACAAGCATATGCTCGAG	CCACCGGGTTACAACATTGC	3027 20 65.06 50.00	ATCTTAAGCGTAATCCGGAACATCGTATGGGTACCAAAACGCACCCACATCAA	ATCTTAAGCGTAATCCGGAACATCGTATGGGTA	CCAAAACGCACCCACATCAA	1146
ALS1 (1)	3783	142 21 65.15 47.62	CATATCGACGACGACGACAAGCATATGCTCGAGTGGAATGCTGTTTTGGGTTGG	CATATCGACGACGACGACAAGCATATGCTCGAG	TGGAATGCTGTTTTGGGTTGG	1296 24 63.39 50.00	ATCTTAAGCGTAATCCGGAACATCGTATGGGTATGGAACTTGTACCACCACTGTGTC	ATCTTAAGCGTAATCCGGAACATCGTATGGGTA	TGGAACTTGTACCACCACTGTGTC	1155
ALS1 (2)	3783	1654 22 65.68 50.00	CATATCGACGACGACGACAAGCATATGCTCGAGTGGTCACAATCCTATGCCACCA	CATATCGACGACGACGACAAGCATATGCTCGAG	TGGTCACAATCCTATGCCACCA	3576 20 63.94 60.00	ATCTTAAGCGTAATCCGGAACATCGTATGGGTAAGCACTGGCAACAGCTCCAC	ATCTTAAGCGTAATCCGGAACATCGTATGGGTA	AGCACTGGCAACAGCTCCAC	1923
ALS10 (2)	4761	1615 22 65.66 54.55	CATATCGACGACGACGACAAGCATATGCTCGAGGAGCCACCAAACCACACTGTCA	CATATCGACGACGACGACAAGCATATGCTCGAG	GAGCCACCAAACCACACTGTCA	3426 20 63.56 60.00	ATCTTAAGCGTAATCCGGAACATCGTATGGGTAACCTGGAGGAGCGGTAATGG	ATCTTAAGCGTAATCCGGAACATCGTATGGGTA	ACCTGGAGGAGCGGTAATGG	1812
ALS10 (3)	4761	2983 22 64.68 59.09	CATATCGACGACGACGACAAGCATATGCTCGAGGCCACTCCAGGTGGTACTGACA	CATATCGACGACGACGACAAGCATATGCTCGAG	GCCACTCCAGGTGGTACTGACA	4389 20 64.21 55.00	ATCTTAAGCGTAATCCGGAACATCGTATGGGTACACGGAACCGGTTGTTGCTA	ATCTTAAGCGTAATCCGGAACATCGTATGGGTA	CACGGAACCGGTTGTTGCTA	1407
ALS11	2292	130 22 64.13 50.00	CATATCGACGACGACGACAAGCATATGCTCGAGCCACGCTATGTCAACACCACAA	CATATCGACGACGACGACAAGCATATGCTCGAG	CCACGCTATGTCAACACCACAA	1632 22 63.91 40.91	ATCTTAAGCGTAATCCGGAACATCGTATGGGTATGCTGGATTTGGCAATGAAGTT	ATCTTAAGCGTAATCCGGAACATCGTATGGGTA	TGCTGGATTTGGCAATGAAGTT	1503
ALS2	1404	454 21 64.20 52.38	CATATCGACGACGACGACAAGCATATGCTCGAGAAGGCTGGCACCAACACAGTT	CATATCGACGACGACGACAAGCATATGCTCGAG	AAGGCTGGCACCAACACAGTT	1296 22 64.51 50.00	ATCTTAAGCGTAATCCGGAACATCGTATGGGTACAGTGGAACTTGCACAACGACA	ATCTTAAGCGTAATCCGGAACATCGTATGGGTA	CAGTGGAACTTGCACAACGACA	843
ALS3 (1)	3468	121 20 64.53 60.00	CATATCGACGACGACGACAAGCATATGCTCGAGAAGGGACCAGGAACCCCAAC	CATATCGACGACGACGACAAGCATATGCTCGAG	AAGGGACCAGGAACCCCAAC	1698 20 63.97 55.00	ATCTTAAGCGTAATCCGGAACATCGTATGGGTATGGTGGGGCAATAACAGTGG	ATCTTAAGCGTAATCCGGAACATCGTATGGGTA	TGGTGGGGCAATAACAGTGG	1578
ALS3 (2)	3468	1579 21 64.46 61.90	CATATCGACGACGACGACAAGCATATGCTCGAGACCGCTCCACCAGGAGGTACT	CATATCGACGACGACGACAAGCATATGCTCGAG	ACCGCTCCACCAGGAGGTACT	3096 20 64.21 55.00	ATCTTAAGCGTAATCCGGAACATCGTATGGGTACACGGAACCGGTTGTTGCTA	ATCTTAAGCGTAATCCGGAACATCGTATGGGTA	CACGGAACCGGTTGTTGCTA	1518
ALS4	1407	130 25 64.02 52.00	CATATCGACGACGACGACAAGCATATGCTCGAGGCTACTCCTACTTGGACCGCTGTAA	CATATCGACGACGACGACAAGCATATGCTCGAG	GCTACTCCTACTTGGACCGCTGTAA	1332 26 63.06 46.15	ATCTTAAGCGTAATCCGGAACATCGTATGGGTACCAATACTCGGTTGTAGTGACAGTTG	ATCTTAAGCGTAATCCGGAACATCGTATGGGTA	CCAATACTCGGTTGTAGTGACAGTTG	1203
ALS5 (1)	4044	250 22 64.86 50.00	CATATCGACGACGACGACAAGCATATGCTCGAGGTTGATTTGACTGCCGATGGTG	CATATCGACGACGACGACAAGCATATGCTCGAG	GTTGATTTGACTGCCGATGGTG	1899 21 65.23 57.14	ATCTTAAGCGTAATCCGGAACATCGTATGGGTACCCAGTTGAGCTCGATGATGG	ATCTTAAGCGTAATCCGGAACATCGTATGGGTA	CCCAGTTGAGCTCGATGATGG	1650
ALS5 (2)	4044	2071 20 62.01 50.00	CATATCGACGACGACGACAAGCATATGCTCGAGTCCTCCATCGATGCACAATC	CATATCGACGACGACGACAAGCATATGCTCGAG	TCCTCCATCGATGCACAATC	3630 20 65.01 60.00	ATCTTAAGCGTAATCCGGAACATCGTATGGGTAAGTTGGAGCGGCCACTTGAG	ATCTTAAGCGTAATCCGGAACATCGTATGGGTA	AGTTGGAGCGGCCACTTGAG	1560
ALS6 (1)	4101	211 20 64.35 50.00	CATATCGACGACGACGACAAGCATATGCTCGAGGTCATGCCCTGCGTTTTCAA	CATATCGACGACGACGACAAGCATATGCTCGAG	GTCATGCCCTGCGTTTTCAA	1716 20 62.56 60.00	ATCTTAAGCGTAATCCGGAACATCGTATGGGTAAGTGCCAAGTGGCCCTGTAG	ATCTTAAGCGTAATCCGGAACATCGTATGGGTA	AGTGCCAAGTGGCCCTGTAG	1506
ALS6 (2)	4101	1876 24 64.98 45.83	CATATCGACGACGACGACAAGCATATGCTCGAGTCAAGCTCAGACATTCCATCAAGC	CATATCGACGACGACGACAAGCATATGCTCGAG	TCAAGCTCAGACATTCCATCAAGC	2649 20 62.56 55.00	ATCTTAAGCGTAATCCGGAACATCGTATGGGTATGGTGAAGCGACAGATGAGC	ATCTTAAGCGTAATCCGGAACATCGTATGGGTA	TGGTGAAGCGACAGATGAGC	774
ALS6 (3)	4101	2308 20 64.15 55.00	CATATCGACGACGACGACAAGCATATGCTCGAGACCATTCTGCCGAGTGACGA	CATATCGACGACGACGACAAGCATATGCTCGAG	ACCATTCTGCCGAGTGACGA	3966 22 64.75 50.00	ATCTTAAGCGTAATCCGGAACATCGTATGGGTAGGTTGGCTGTGAGTTTGAAGCA	ATCTTAAGCGTAATCCGGAACATCGTATGGGTA	GGTTGGCTGTGAGTTTGAAGCA	1659
ALS7 (1)	6003	157 20 65.14 50.00	CATATCGACGACGACGACAAGCATATGCTCGAGTTGGAATGGGCTTTGGATGG	CATATCGACGACGACGACAAGCATATGCTCGAG	TTGGAATGGGCTTTGGATGG	1713 20 64.77 60.00	ATCTTAAGCGTAATCCGGAACATCGTATGGGTAAGTGCCTTCTGGACCGTTGG	ATCTTAAGCGTAATCCGGAACATCGTATGGGTA	AGTGCCTTCTGGACCGTTGG	1557
ALS7 (2)	6003	1903 21 64.89 52.38	CATATCGACGACGACGACAAGCATATGCTCGAGACCATCACCAACGGTCCAGAA	CATATCGACGACGACGACAAGCATATGCTCGAG	ACCATCACCAACGGTCCAGAA	3432 20 64.46 55.00	ATCTTAAGCGTAATCCGGAACATCGTATGGGTATAAAGCATCGGTGGCAGACG	ATCTTAAGCGTAATCCGGAACATCGTATGGGTA	TAAAGCATCGGTGGCAGACG	1530
ALS7(3)	6003	3880 20 64.90 60.00	CATATCGACGACGACGACAAGCATATGCTCGAGCTGTCGTCGGTTGCTGGAGA	CATATCGACGACGACGACAAGCATATGCTCGAG	CTGTCGTCGGTTGCTGGAGA	5778 21 65.45 52.38	ATCTTAAGCGTAATCCGGAACATCGTATGGGTATGAGCTTGTCCCAAAGCCTGA	ATCTTAAGCGTAATCCGGAACATCGTATGGGTA	TGAGCTTGTCCCAAAGCCTGA	1899
ALS8 (1)	3468	121 20 64.53 60.00	CATATCGACGACGACGACAAGCATATGCTCGAGAAGGGACCAGGAACCCCAAC	CATATCGACGACGACGACAAGCATATGCTCGAG	AAGGGACCAGGAACCCCAAC	1698 20 63.97 55.00	ATCTTAAGCGTAATCCGGAACATCGTATGGGTATGGTGGGGCAATAACAGTGG	ATCTTAAGCGTAATCCGGAACATCGTATGGGTA	TGGTGGGGCAATAACAGTGG	1578
ALS8 (2)	3468	1795 20 63.82 60.00	CATATCGACGACGACGACAAGCATATGCTCGAGACCGCTCCTCCAGGTGAAAC	CATATCGACGACGACGACAAGCATATGCTCGAG	ACCGCTCCTCCAGGTGAAAC	3312 22 63.80 40.91	ATCTTAAGCGTAATCCGGAACATCGTATGGGTATTGCGATTGAGATTGGTTGGTT	ATCTTAAGCGTAATCCGGAACATCGTATGGGTA	TTGCGATTGAGATTGGTTGGTT	1518
ALS9 (1)	5565	181 20 63.94 60.00	CATATCGACGACGACGACAAGCATATGCTCGAGGCTGACGCAGGAGACACGTT	CATATCGACGACGACGACAAGCATATGCTCGAG	GCTGACGCAGGAGACACGTT	1809 20 63.62 55.00	ATCTTAAGCGTAATCCGGAACATCGTATGGGTAACCATCAGGTGGGTTGGTGA	ATCTTAAGCGTAATCCGGAACATCGTATGGGTA	ACCATCAGGTGGGTTGGTGA	1629
ALS9 (2)	5565	1897 21 64.32 57.14	CATATCGACGACGACGACAAGCATATGCTCGAGGTCACCAACCCACCTGATGGT	CATATCGACGACGACGACAAGCATATGCTCGAG	GTCACCAACCCACCTGATGGT	3525 21 64.19 57.14	ATCTTAAGCGTAATCCGGAACATCGTATGGGTAGGTCGTTGAAGTTGGCACCTC	ATCTTAAGCGTAATCCGGAACATCGTATGGGTA	GGTCGTTGAAGTTGGCACCTC	1629
ALS9 (3)	5565	3712 22 62.03 50.00	CATATCGACGACGACGACAAGCATATGCTCGAGGGAAACTCGAACAAGCCAGAGT	CATATCGACGACGACGACAAGCATATGCTCGAG	GGAAACTCGAACAAGCCAGAGT	5616 22 62.79 50.00	ATCTTAAGCGTAATCCGGAACATCGTATGGGTAGATAACCGAACCAGAACCATCG	ATCTTAAGCGTAATCCGGAACATCGTATGGGTA	GATAACCGAACCAGAACCATCG	1905
ARR3	1182	118 20 62.66 55.00	CATATCGACGACGACGACAAGCATATGCTCGAGCCTGGGAGCAGTGAAGCATT	CATATCGACGACGACGACAAGCATATGCTCGAG	CCTGGGAGCAGTGAAGCATT	1026 21 62.85 42.86	ATCTTAAGCGTAATCCGGAACATCGTATGGGTATGAAATCGCAACAGCAAGTGA	ATCTTAAGCGTAATCCGGAACATCGTATGGGTA	TGAAATCGCAACAGCAAGTGA	909
ATC1 (1)	3237	188 20 64.10 55.00	CATATCGACGACGACGACAAGCATATGCTCGAGTAGTTCCAAGCACGGCCAGA	CATATCGACGACGACGACAAGCATATGCTCGAG	TAGTTCCAAGCACGGCCAGA	1564 20 64.22 60.00	ATCTTAAGCGTAATCCGGAACATCGTATGGGTACCGCACCTTGATACCCCCTA	ATCTTAAGCGTAATCCGGAACATCGTATGGGTA	CCGCACCTTGATACCCCCTA	1377
ATC1 (2)	3237	1678 20 64.89 60.00	CATATCGACGACGACGACAAGCATATGCTCGAGAGCGGAGCAGCCGATGATAC	CATATCGACGACGACGACAAGCATATGCTCGAG	AGCGGAGCAGCCGATGATAC	3213 20 64.21 50.00	ATCTTAAGCGTAATCCGGAACATCGTATGGGTATTTTGCCCCGCCATAATCTC	ATCTTAAGCGTAATCCGGAACATCGTATGGGTA	TTTTGCCCCGCCATAATCTC	1536
AXL1 (1)	4113	133 21 62.80 47.62	CATATCGACGACGACGACAAGCATATGCTCGAGTGTCATCATCACGGTGGTTTG	CATATCGACGACGACGACAAGCATATGCTCGAG	TGTCATCATCACGGTGGTTTG	1980 23 62.63 34.78	ATCTTAAGCGTAATCCGGAACATCGTATGGGTATTTGTTGTTGTTTGATTGGAGCA	ATCTTAAGCGTAATCCGGAACATCGTATGGGTA	TTTGTTGTTGTTTGATTGGAGCA	1848
AXL1 (2)	4113	2281 22 63.44 40.91	CATATCGACGACGACGACAAGCATATGCTCGAGTGGCATATTAGCCAACCCAAAA	CATATCGACGACGACGACAAGCATATGCTCGAG	TGGCATATTAGCCAACCCAAAA	3789 20 64.79 55.00	ATCTTAAGCGTAATCCGGAACATCGTATGGGTAACCACCACCACCAGCATGAA	ATCTTAAGCGTAATCCGGAACATCGTATGGGTA	ACCACCACCACCAGCATGAA	1509
AXL2 (1)	2802	187 22 65.23 50.00	CATATCGACGACGACGACAAGCATATGCTCGAGTCAGATGTGGGCCTGTTTGAGA	CATATCGACGACGACGACAAGCATATGCTCGAG	TCAGATGTGGGCCTGTTTGAGA	1389 22 64.60 50.00	ATCTTAAGCGTAATCCGGAACATCGTATGGGTATGGAATACCCACACCAAGACCA	ATCTTAAGCGTAATCCGGAACATCGTATGGGTA	TGGAATACCCACACCAAGACCA	1203
AXL2 (2)	2802	1558 20 65.04 60.00	CATATCGACGACGACGACAAGCATATGCTCGAGGGTGCTGGTGCAGGAGCTTT	CATATCGACGACGACGACAAGCATATGCTCGAG	GGTGCTGGTGCAGGAGCTTT	2661 23 63.02 39.13	ATCTTAAGCGTAATCCGGAACATCGTATGGGTATGATGATGGGCTATTTTTGTTGG	ATCTTAAGCGTAATCCGGAACATCGTATGGGTA	TGATGATGGGCTATTTTTGTTGG	1104
BGL2	927	172 26 62.12 34.62	CATATCGACGACGACGACAAGCATATGCTCGAGTATGCTGTTTCCGATTGTAACACTTT	CATATCGACGACGACGACAAGCATATGCTCGAG	TATGCTGTTTCCGATTGTAACACTTT	885 20 64.02 50.00	ATCTTAAGCGTAATCCGGAACATCGTATGGGTAGGATTGCCAAACACCCCAAT	ATCTTAAGCGTAATCCGGAACATCGTATGGGTA	GGATTGCCAAACACCCCAAT	714
BIG1	969	109 23 62.18 39.13	CATATCGACGACGACGACAAGCATATGCTCGAGAATCCTTCAAACACTTTGCCTCA	CATATCGACGACGACGACAAGCATATGCTCGAG	AATCCTTCAAACACTTTGCCTCA	939 23 63.24 39.13	ATCTTAAGCGTAATCCGGAACATCGTATGGGTAACCTCGCTTCGATTTTTGTTGTT	ATCTTAAGCGTAATCCGGAACATCGTATGGGTA	ACCTCGCTTCGATTTTTGTTGTT	831
BMH1	795	163 20 64.40 60.00	CATATCGACGACGACGACAAGCATATGCTCGAGGGTGCTCGTCGTGCTTCTTG	CATATCGACGACGACGACAAGCATATGCTCGAG	GGTGCTCGTCGTGCTTCTTG	762 21 64.92 57.14	ATCTTAAGCGTAATCCGGAACATCGTATGGGTAAGCAGCTGGAGCTTGACTGGA	ATCTTAAGCGTAATCCGGAACATCGTATGGGTA	AGCAGCTGGAGCTTGACTGGA	600
BUL1	2226	139 21 64.78 57.14	CATATCGACGACGACGACAAGCATATGCTCGAGACTGATGCAGAACCCCCTTCC	CATATCGACGACGACGACAAGCATATGCTCGAG	ACTGATGCAGAACCCCCTTCC	2124 22 63.64 40.91	ATCTTAAGCGTAATCCGGAACATCGTATGGGTATGATTGGAAATCAGGGACCAAA	ATCTTAAGCGTAATCCGGAACATCGTATGGGTA	TGATTGGAAATCAGGGACCAAA	1986
CAG1	1290	139 20 64.35 55.00	CATATCGACGACGACGACAAGCATATGCTCGAGTTGGGTGCTGGTGAAAGTGG	CATATCGACGACGACGACAAGCATATGCTCGAG	TTGGGTGCTGGTGAAAGTGG	1251 23 62.51 47.83	ATCTTAAGCGTAATCCGGAACATCGTATGGGTACATGTCGGTAACAGCACTCAAGA	ATCTTAAGCGTAATCCGGAACATCGTATGGGTA	CATGTCGGTAACAGCACTCAAGA	1113
CAN1	1716	202 24 64.17 41.67	CATATCGACGACGACGACAAGCATATGCTCGAGCACGTTTCTATGATTGCCATTGGT	CATATCGACGACGACGACAAGCATATGCTCGAG	CACGTTTCTATGATTGCCATTGGT	1704 21 62.35 47.62	ATCTTAAGCGTAATCCGGAACATCGTATGGGTAAGCCCAGAATTTATCCCATGC	ATCTTAAGCGTAATCCGGAACATCGTATGGGTA	AGCCCAGAATTTATCCCATGC	1503
CDC19	1515	106 24 63.65 37.50	CATATCGACGACGACGACAAGCATATGCTCGAGAACAACGTGGACGTTTTGGTTAAA	CATATCGACGACGACGACAAGCATATGCTCGAG	AACAACGTGGACGTTTTGGTTAAA	1413 23 64.65 47.83	ATCTTAAGCGTAATCCGGAACATCGTATGGGTAAGCTTCAGAAACAGCCCATCTCA	ATCTTAAGCGTAATCCGGAACATCGTATGGGTA	AGCTTCAGAAACAGCCCATCTCA	1308
CDC24 (1)	2535	7 20 62.15 60.00	CATATCGACGACGACGACAAGCATATGCTCGAGCATCCACCAGCAGCTCTCAG	CATATCGACGACGACGACAAGCATATGCTCGAG	CATCCACCAGCAGCTCTCAG	1299 24 63.87 45.83	ATCTTAAGCGTAATCCGGAACATCGTATGGGTAGGGGTCCTGTTTTGAATATTCTGG	ATCTTAAGCGTAATCCGGAACATCGTATGGGTA	GGGGTCCTGTTTTGAATATTCTGG	1293
CDC24 (2)	2535	1303 20 64.30 60.00	CATATCGACGACGACGACAAGCATATGCTCGAGGGCAGCTCGTCATCGACATC	CATATCGACGACGACGACAAGCATATGCTCGAG	GGCAGCTCGTCATCGACATC	2529 21 63.41 57.14	ATCTTAAGCGTAATCCGGAACATCGTATGGGTAAACCCACACTGTCACCAGTCG	ATCTTAAGCGTAATCCGGAACATCGTATGGGTA	AACCCACACTGTCACCAGTCG	1227
CDR1(1)	4506	100 23 65.16 47.83	CATATCGACGACGACGACAAGCATATGCTCGAGGGGTTTGATGCCCATACAAGTGA	CATATCGACGACGACGACAAGCATATGCTCGAG	GGGTTTGATGCCCATACAAGTGA	1545 22 63.74 50.00	ATCTTAAGCGTAATCCGGAACATCGTATGGGTAAGGAATCGACGGATCACCTTTC	ATCTTAAGCGTAATCCGGAACATCGTATGGGTA	AGGAATCGACGGATCACCTTTC	1446
CDR1(2)	4506	1639 20 64.02 55.00	CATATCGACGACGACGACAAGCATATGCTCGAGGGTGCTGCCATGTTCTTTGC	CATATCGACGACGACGACAAGCATATGCTCGAG	GGTGCTGCCATGTTCTTTGC	2997 22 64.62 54.55	ATCTTAAGCGTAATCCGGAACATCGTATGGGTATTCACCAGCGACACCAACTAGG	ATCTTAAGCGTAATCCGGAACATCGTATGGGTA	TTCACCAGCGACACCAACTAGG	1359
CDR1(2)	4506	1639 20 64.02 55.00	CATATCGACGACGACGACAAGCATATGCTCGAGGGTGCTGCCATGTTCTTTGC	CATATCGACGACGACGACAAGCATATGCTCGAG	GGTGCTGCCATGTTCTTTGC	2997 22 64.62 54.55	ATCTTAAGCGTAATCCGGAACATCGTATGGGTATTCACCAGCGACACCAACTAGG	ATCTTAAGCGTAATCCGGAACATCGTATGGGTA	TTCACCAGCGACACCAACTAGG	1359
CDR1(3)	4506	3019 24 64.68 37.50	CATATCGACGACGACGACAAGCATATGCTCGAGAAAAGATTGACCATTGGGGTTGAA	CATATCGACGACGACGACAAGCATATGCTCGAG	AAAAGATTGACCATTGGGGTTGAA	4425 25 64.36 36.00	ATCTTAAGCGTAATCCGGAACATCGTATGGGTAAGCAATGAAAGCAATGAAAATACCG	ATCTTAAGCGTAATCCGGAACATCGTATGGGTA	AGCAATGAAAGCAATGAAAATACCG	1407
CDR11 (1)	4542	154 23 65.63 47.83	CATATCGACGACGACGACAAGCATATGCTCGAGGCAAAGTCAAGTTTGGTCCGACA	CATATCGACGACGACGACAAGCATATGCTCGAG	GCAAAGTCAAGTTTGGTCCGACA	1560 25 63.78 44.00	ATCTTAAGCGTAATCCGGAACATCGTATGGGTAGAGCCCCATTATTATTTGTCCACAG	ATCTTAAGCGTAATCCGGAACATCGTATGGGTA	GAGCCCCATTATTATTTGTCCACAG	1407
CDR11 (2)	4542	1690 22 63.39 50.00	CATATCGACGACGACGACAAGCATATGCTCGAGGCTCGACCAGTTGTTGAAAAGC	CATATCGACGACGACGACAAGCATATGCTCGAG	GCTCGACCAGTTGTTGAAAAGC	3111 22 64.04 45.45	ATCTTAAGCGTAATCCGGAACATCGTATGGGTAACAAATCGACCAGGCAGTTTGA	ATCTTAAGCGTAATCCGGAACATCGTATGGGTA	ACAAATCGACCAGGCAGTTTGA	1422
CDR11 (3.1)	4542	3013 23 63.72 39.13	CATATCGACGACGACGACAAGCATATGCTCGAGAAAAGATTGACCATTGGGGTTGA	CATATCGACGACGACGACAAGCATATGCTCGAG	AAAAGATTGACCATTGGGGTTGA	4473 24 64.30 45.83	ATCTTAAGCGTAATCCGGAACATCGTATGGGTAACCTTTTGGAACTCTAGCCAACCA	ATCTTAAGCGTAATCCGGAACATCGTATGGGTA	ACCTTTTGGAACTCTAGCCAACCA	1461
CDR11 (3.2)	4542	3211 21 63.16 42.86	CATATCGACGACGACGACAAGCATATGCTCGAGTTGCAAAAAGGTGGTCAAACG	CATATCGACGACGACGACAAGCATATGCTCGAG	TTGCAAAAAGGTGGTCAAACG	4341 20 63.78 60.00	ATCTTAAGCGTAATCCGGAACATCGTATGGGTACCCTGACTCTGCAGCACCAT	ATCTTAAGCGTAATCCGGAACATCGTATGGGTA	CCCTGACTCTGCAGCACCAT	1131
CDR2 (1)	4500	100 24 63.63 45.83	CATATCGACGACGACGACAAGCATATGCTCGAGGCTACTGCAAGTCACAACATCCAA	CATATCGACGACGACGACAAGCATATGCTCGAG	GCTACTGCAAGTCACAACATCCAA	1410 22 64.27 50.00	ATCTTAAGCGTAATCCGGAACATCGTATGGGTAACGATAAGTTTCCCCGGTGTTG	ATCTTAAGCGTAATCCGGAACATCGTATGGGTA	ACGATAAGTTTCCCCGGTGTTG	1311
CDR2 (2)	4500	1384 20 66.86 60.00	CATATCGACGACGACGACAAGCATATGCTCGAGCGATCCAACACCGGGGAAAC	CATATCGACGACGACGACAAGCATATGCTCGAG	CGATCCAACACCGGGGAAAC	2994 20 64.02 55.00	ATCTTAAGCGTAATCCGGAACATCGTATGGGTAACCTTCACCAGCGACACCAA	ATCTTAAGCGTAATCCGGAACATCGTATGGGTA	ACCTTCACCAGCGACACCAA	1611
CDR3	1221	106 22 64.48 45.45	CATATCGACGACGACGACAAGCATATGCTCGAGCGTTTGGAAGAAATGCCAGGTT	CATATCGACGACGACGACAAGCATATGCTCGAG	CGTTTGGAAGAAATGCCAGGTT	1203 21 64.01 52.38	ATCTTAAGCGTAATCCGGAACATCGTATGGGTAGGTGTCACCACCACCATTCAA	ATCTTAAGCGTAATCCGGAACATCGTATGGGTA	GGTGTCACCACCACCATTCAA	1098
CDR4 (1)	4473	130 20 65.13 50.00	CATATCGACGACGACGACAAGCATATGCTCGAGTCACACGCAAGCATTCAGCA	CATATCGACGACGACGACAAGCATATGCTCGAG	TCACACGCAAGCATTCAGCA	1473 20 63.34 55.00	ATCTTAAGCGTAATCCGGAACATCGTATGGGTAAGGGGATGCAGGCTTCAAGT	ATCTTAAGCGTAATCCGGAACATCGTATGGGTA	AGGGGATGCAGGCTTCAAGT	1344
CDR4 (2)	4473	1429 20 65.15 55.00	CATATCGACGACGACGACAAGCATATGCTCGAGGCGCATCAAGCACGTCAATC	CATATCGACGACGACGACAAGCATATGCTCGAG	GCGCATCAAGCACGTCAATC	2937 22 65.32 50.00	ATCTTAAGCGTAATCCGGAACATCGTATGGGTATGCATCCGCATACTGTTCCATC	ATCTTAAGCGTAATCCGGAACATCGTATGGGTA	TGCATCCGCATACTGTTCCATC	1509
CDR4 (3)	4473	3136 21 64.63 52.38	CATATCGACGACGACGACAAGCATATGCTCGAGCACCAGCCATCAGCCATTCTT	CATATCGACGACGACGACAAGCATATGCTCGAG	CACCAGCCATCAGCCATTCTT	4437 20 63.87 50.00	ATCTTAAGCGTAATCCGGAACATCGTATGGGTATGGCACTCTGGCAAACCAAT	ATCTTAAGCGTAATCCGGAACATCGTATGGGTA	TGGCACTCTGGCAAACCAAT	1302
CEF3 (1)	3153	124 25 64.30 40.00	CATATCGACGACGACGACAAGCATATGCTCGAGATTGTTGAACACGATGTTCCAGTTG	CATATCGACGACGACGACAAGCATATGCTCGAG	ATTGTTGAACACGATGTTCCAGTTG	1530 21 65.04 61.90	ATCTTAAGCGTAATCCGGAACATCGTATGGGTAGGTTGTGTCGGCGTGAGTACC	ATCTTAAGCGTAATCCGGAACATCGTATGGGTA	GGTTGTGTCGGCGTGAGTACC	1407
CEF3 (2)	3153	1612 22 63.04 40.91	CATATCGACGACGACGACAAGCATATGCTCGAGTCCGATGAAATGATCAACATGC	CATATCGACGACGACGACAAGCATATGCTCGAG	TCCGATGAAATGATCAACATGC	3042 21 63.72 52.38	ATCTTAAGCGTAATCCGGAACATCGTATGGGTAAGCAGCGGCAATCTTGTTACC	ATCTTAAGCGTAATCCGGAACATCGTATGGGTA	AGCAGCGGCAATCTTGTTACC	1431
CFL1	2283	181 20 64.40 55.00	CATATCGACGACGACGACAAGCATATGCTCGAGACGGATGCTGGGTTTGGAAC	CATATCGACGACGACGACAAGCATATGCTCGAG	ACGGATGCTGGGTTTGGAAC	1788 20 64.71 50.00	ATCTTAAGCGTAATCCGGAACATCGTATGGGTAACCCCCAGCAACAAAAACCA	ATCTTAAGCGTAATCCGGAACATCGTATGGGTA	ACCCCCAGCAACAAAAACCA	1608
CFL2	2217	406 22 64.28 45.45	CATATCGACGACGACGACAAGCATATGCTCGAGACGAAAGCATCAGGAACTGCAA	CATATCGACGACGACGACAAGCATATGCTCGAG	ACGAAAGCATCAGGAACTGCAA	2127 20 65.95 60.00	ATCTTAAGCGTAATCCGGAACATCGTATGGGTACATGGCAGGATGTCCACACG	ATCTTAAGCGTAATCCGGAACATCGTATGGGTA	CATGGCAGGATGTCCACACG	1722
CFL4	2133	205 20 63.38 50.00	CATATCGACGACGACGACAAGCATATGCTCGAGGCTGGTTGTTTGGCCTTTGA	CATATCGACGACGACGACAAGCATATGCTCGAG	GCTGGTTGTTTGGCCTTTGA	1914 22 62.96 50.00	ATCTTAAGCGTAATCCGGAACATCGTATGGGTACAAGTCAACACCTTGCAACGAC	ATCTTAAGCGTAATCCGGAACATCGTATGGGTA	CAAGTCAACACCTTGCAACGAC	1710
CFL5	2133	190 21 65.52 52.38	CATATCGACGACGACGACAAGCATATGCTCGAGGCTTTGGCAACGTATGCTGGA	CATATCGACGACGACGACAAGCATATGCTCGAG	GCTTTGGCAACGTATGCTGGA	2028 22 65.14 50.00	ATCTTAAGCGTAATCCGGAACATCGTATGGGTAACCACAGGAGACAAATGCGACA	ATCTTAAGCGTAATCCGGAACATCGTATGGGTA	ACCACAGGAGACAAATGCGACA	1839
CHK1 (1)	7416	139 22 65.31 50.00	CATATCGACGACGACGACAAGCATATGCTCGAGAGGCTGGACGAAACAGAAACCA	CATATCGACGACGACGACAAGCATATGCTCGAG	AGGCTGGACGAAACAGAAACCA	1893 20 62.17 55.00	ATCTTAAGCGTAATCCGGAACATCGTATGGGTACAATGAGTGGCAGTCGGTGT	ATCTTAAGCGTAATCCGGAACATCGTATGGGTA	CAATGAGTGGCAGTCGGTGT	1755
CHK1 (2)	7416	1945 21 64.70 47.62	CATATCGACGACGACGACAAGCATATGCTCGAGTCAGGGGAAACAATCCCCAAT	CATATCGACGACGACGACAAGCATATGCTCGAG	TCAGGGGAAACAATCCCCAAT	3645 19 65.12 57.89	ATCTTAAGCGTAATCCGGAACATCGTATGGGTATCGTCCTGCCTGGACCAAA	ATCTTAAGCGTAATCCGGAACATCGTATGGGTA	TCGTCCTGCCTGGACCAAA	1701
CHK1 (3)	7416	3991 21 62.23 42.86	CATATCGACGACGACGACAAGCATATGCTCGAGTTGGGAAAAATTCCGCTCTCT	CATATCGACGACGACGACAAGCATATGCTCGAG	TTGGGAAAAATTCCGCTCTCT	5361 20 64.02 55.00	ATCTTAAGCGTAATCCGGAACATCGTATGGGTATCCGTGGACCAACTGCTTGT	ATCTTAAGCGTAATCCGGAACATCGTATGGGTA	TCCGTGGACCAACTGCTTGT	1371
CHS1 (1)	3081	109 20 64.72 60.00	CATATCGACGACGACGACAAGCATATGCTCGAGCCCCGCAAGACATACCAACC	CATATCGACGACGACGACAAGCATATGCTCGAG	CCCCGCAAGACATACCAACC	1251 20 64.47 50.00	ATCTTAAGCGTAATCCGGAACATCGTATGGGTAGGGCCTGGCCAAATTTTCTT	ATCTTAAGCGTAATCCGGAACATCGTATGGGTA	GGGCCTGGCCAAATTTTCTT	1143
CHS1 (2)	3081	1921 20 64.48 55.00	CATATCGACGACGACGACAAGCATATGCTCGAGCTGGCAACCGGTGAAACTGA	CATATCGACGACGACGACAAGCATATGCTCGAG	CTGGCAACCGGTGAAACTGA	3069 20 64.99 55.00	ATCTTAAGCGTAATCCGGAACATCGTATGGGTAATTGTGACTCGGCGCGGTAT	ATCTTAAGCGTAATCCGGAACATCGTATGGGTA	ATTGTGACTCGGCGCGGTAT	1149
CHS2 (1)	3030	268 23 64.39 47.83	CATATCGACGACGACGACAAGCATATGCTCGAGCAAACACAGATCCAACCTCCACA	CATATCGACGACGACGACAAGCATATGCTCGAG	CAAACACAGATCCAACCTCCACA	1476 21 64.53 52.38	ATCTTAAGCGTAATCCGGAACATCGTATGGGTAACAAGCACCAGCAACACGATG	ATCTTAAGCGTAATCCGGAACATCGTATGGGTA	ACAAGCACCAGCAACACGATG	1209
CHS2 (2)	3030	1606 20 63.56 55.00	CATATCGACGACGACGACAAGCATATGCTCGAGGTGTTACCCGGGGCATTTTC	CATATCGACGACGACGACAAGCATATGCTCGAG	GTGTTACCCGGGGCATTTTC	2946 21 64.58 47.62	ATCTTAAGCGTAATCCGGAACATCGTATGGGTATGCCATAAATGCCACTGTCCA	ATCTTAAGCGTAATCCGGAACATCGTATGGGTA	TGCCATAAATGCCACTGTCCA	1341
CHS8 (1)	3318	106 20 64.11 55.00	CATATCGACGACGACGACAAGCATATGCTCGAGTCACCATCACAGCCTCAGCA	CATATCGACGACGACGACAAGCATATGCTCGAG	TCACCATCACAGCCTCAGCA	1698 21 65.70 52.38	ATCTTAAGCGTAATCCGGAACATCGTATGGGTAGGCAACTCGCATTTCTCCACA	ATCTTAAGCGTAATCCGGAACATCGTATGGGTA	GGCAACTCGCATTTCTCCACA	1593
CHS8 (2)	3318	1783 20 65.66 55.00	CATATCGACGACGACGACAAGCATATGCTCGAGCCGATGGAATCGGTGTTTGG	CATATCGACGACGACGACAAGCATATGCTCGAG	CCGATGGAATCGGTGTTTGG	3291 26 63.63 38.46	ATCTTAAGCGTAATCCGGAACATCGTATGGGTAACGTTTGTTTTCTCGTTTAGCTCTCA	ATCTTAAGCGTAATCCGGAACATCGTATGGGTA	ACGTTTGTTTTCTCGTTTAGCTCTCA	1509
CHT1	1389	142 25 62.72 40.00	CATATCGACGACGACGACAAGCATATGCTCGAGATACTTTCGTTTCTTGATGGGTTCC	CATATCGACGACGACGACAAGCATATGCTCGAG	ATACTTTCGTTTCTTGATGGGTTCC	1341 25 62.19 32.00	ATCTTAAGCGTAATCCGGAACATCGTATGGGTATTGCAAGTTTGTAGATTTTGCTTCA	ATCTTAAGCGTAATCCGGAACATCGTATGGGTA	TTGCAAGTTTGTAGATTTTGCTTCA	1200
CHT2	1752	103 23 65.53 47.83	CATATCGACGACGACGACAAGCATATGCTCGAGGGTGGTCAAGAAAGATTGGCACA	CATATCGACGACGACGACAAGCATATGCTCGAG	GGTGGTCAAGAAAGATTGGCACA	1692 20 65.29 55.00	ATCTTAAGCGTAATCCGGAACATCGTATGGGTATGCAACTGCAGCACCACCTT	ATCTTAAGCGTAATCCGGAACATCGTATGGGTA	TGCAACTGCAGCACCACCTT	1590
CNH1 (1)	2403	121 19 64.87 63.16	CATATCGACGACGACGACAAGCATATGCTCGAGGCCACCGTCGCATCCATAG	CATATCGACGACGACGACAAGCATATGCTCGAG	GCCACCGTCGCATCCATAG	1239 21 64.63 57.14	ATCTTAAGCGTAATCCGGAACATCGTATGGGTATGTGGCGAGCAACTGGTAGTG	ATCTTAAGCGTAATCCGGAACATCGTATGGGTA	TGTGGCGAGCAACTGGTAGTG	1119
CNH1 (2)	2403	1279 24 64.20 45.83	CATATCGACGACGACGACAAGCATATGCTCGAGATCGTCCATGGATCTTCAGTAGCA	CATATCGACGACGACGACAAGCATATGCTCGAG	ATCGTCCATGGATCTTCAGTAGCA	2388 24 63.97 50.00	ATCTTAAGCGTAATCCGGAACATCGTATGGGTATTCTCTATCGCGACGACTACTTGG	ATCTTAAGCGTAATCCGGAACATCGTATGGGTA	TTCTCTATCGCGACGACTACTTGG	1110
CNT	1827	121 23 64.62 43.48	CATATCGACGACGACGACAAGCATATGCTCGAGGAATCAGCTTTGCAATCACACGA	CATATCGACGACGACGACAAGCATATGCTCGAG	GAATCAGCTTTGCAATCACACGA	1764 20 65.05 55.00	ATCTTAAGCGTAATCCGGAACATCGTATGGGTAAGTGGCAATGGCACCACAGA	ATCTTAAGCGTAATCCGGAACATCGTATGGGTA	AGTGGCAATGGCACCACAGA	1644
CRH11	1362	100 21 64.60 52.38	CATATCGACGACGACGACAAGCATATGCTCGAGCCAGTTCCTGCTTTGGGATCA	CATATCGACGACGACGACAAGCATATGCTCGAG	CCAGTTCCTGCTTTGGGATCA	1248 20 65.28 60.00	ATCTTAAGCGTAATCCGGAACATCGTATGGGTAGGAAGATGGAGCGGCATCAC	ATCTTAAGCGTAATCCGGAACATCGTATGGGTA	GGAAGATGGAGCGGCATCAC	1149
CRH12	1515	133 25 64.82 44.00	CATATCGACGACGACGACAAGCATATGCTCGAGCCTTATCGGGATAAAGCTTGTTTGG	CATATCGACGACGACGACAAGCATATGCTCGAG	CCTTATCGGGATAAAGCTTGTTTGG	1458 26 65.08 42.31	ATCTTAAGCGTAATCCGGAACATCGTATGGGTATGTGGCCAATATACTTGAAACACCTG	ATCTTAAGCGTAATCCGGAACATCGTATGGGTA	TGTGGCCAATATACTTGAAACACCTG	1326
CRP1 (1)	3594	109 25 64.49 40.00	CATATCGACGACGACGACAAGCATATGCTCGAGAATGCAAACATAAAGCCATCTGAGG	CATATCGACGACGACGACAAGCATATGCTCGAG	AATGCAAACATAAAGCCATCTGAGG	1719 20 62.77 50.00	ATCTTAAGCGTAATCCGGAACATCGTATGGGTAGTGCAATCCATGATGGGTCA	ATCTTAAGCGTAATCCGGAACATCGTATGGGTA	GTGCAATCCATGATGGGTCA	1611
CRP1 (2)	3594	1705 21 63.96 47.62	CATATCGACGACGACGACAAGCATATGCTCGAGCATCATGGATTGCACACGACA	CATATCGACGACGACGACAAGCATATGCTCGAG	CATCATGGATTGCACACGACA	3456 20 64.91 60.00	ATCTTAAGCGTAATCCGGAACATCGTATGGGTAGGCCCACACAGGATCCAATC	ATCTTAAGCGTAATCCGGAACATCGTATGGGTA	GGCCCACACAGGATCCAATC	1752
CSA1 (1)	3057	121 23 62.29 47.83	CATATCGACGACGACGACAAGCATATGCTCGAGGCCAAGACTGCTTCTATCAATGG	CATATCGACGACGACGACAAGCATATGCTCGAG	GCCAAGACTGCTTCTATCAATGG	1608 22 64.13 45.45	ATCTTAAGCGTAATCCGGAACATCGTATGGGTATTCAGCAGGTTGTTGTGAAGCA	ATCTTAAGCGTAATCCGGAACATCGTATGGGTA	TTCAGCAGGTTGTTGTGAAGCA	1488
CSA1 (2)	3057	1639 20 64.11 55.00	CATATCGACGACGACGACAAGCATATGCTCGAGTCAGCCCCATCAACTCCTGA	CATATCGACGACGACGACAAGCATATGCTCGAG	TCAGCCCCATCAACTCCTGA	2808 20 65.20 55.00	ATCTTAAGCGTAATCCGGAACATCGTATGGGTATTGGGCGTGAGCAGCACTTA	ATCTTAAGCGTAATCCGGAACATCGTATGGGTA	TTGGGCGTGAGCAGCACTTA	1170
CSC25	4002	121 20 64.64 60.00	CATATCGACGACGACGACAAGCATATGCTCGAGTTCCCTGGAACCCAGTCGTC	CATATCGACGACGACGACAAGCATATGCTCGAG	TTCCCTGGAACCCAGTCGTC	1821 22 63.93 50.00	ATCTTAAGCGTAATCCGGAACATCGTATGGGTAGCGATTCTTCAAGTCGTCTCCA	ATCTTAAGCGTAATCCGGAACATCGTATGGGTA	GCGATTCTTCAAGTCGTCTCCA	1701
CSH1	1014	133 22 64.94 54.55	CATATCGACGACGACGACAAGCATATGCTCGAGGACAACGGGTTCCGTACTTTCG	CATATCGACGACGACGACAAGCATATGCTCGAG	GACAACGGGTTCCGTACTTTCG	999 20 64.00 50.00	ATCTTAAGCGTAATCCGGAACATCGTATGGGTATGCCAAGTCTTTGGCGTGAT	ATCTTAAGCGTAATCCGGAACATCGTATGGGTA	TGCCAAGTCTTTGGCGTGAT	867
CSP37	966	118 22 63.25 45.45	CATATCGACGACGACGACAAGCATATGCTCGAGACCCAACGTGTTGAAAACAAGG	CATATCGACGACGACGACAAGCATATGCTCGAG	ACCCAACGTGTTGAAAACAAGG	849 26 63.96 34.62	ATCTTAAGCGTAATCCGGAACATCGTATGGGTATTGGTTTTTAGAAGCATCATTGGCTA	ATCTTAAGCGTAATCCGGAACATCGTATGGGTA	TTGGTTTTTAGAAGCATCATTGGCTA	732
CWH41	1263	124 26 64.08 38.46	CATATCGACGACGACGACAAGCATATGCTCGAGGCAACCCAGTATTCACAAATATCCAA	CATATCGACGACGACGACAAGCATATGCTCGAG	GCAACCCAGTATTCACAAATATCCAA	855 22 64.02 50.00	ATCTTAAGCGTAATCCGGAACATCGTATGGGTATGGGATAGCTTCAACACCTCCA	ATCTTAAGCGTAATCCGGAACATCGTATGGGTA	TGGGATAGCTTCAACACCTCCA	732
CYC3	795	112 20 65.34 55.00	CATATCGACGACGACGACAAGCATATGCTCGAGCCAACATGCCCCGTCAAACT	CATATCGACGACGACGACAAGCATATGCTCGAG	CCAACATGCCCCGTCAAACT	783 21 64.10 47.62	ATCTTAAGCGTAATCCGGAACATCGTATGGGTATTCGCCCATAGCTTTCTTCCA	ATCTTAAGCGTAATCCGGAACATCGTATGGGTA	TTCGCCCATAGCTTTCTTCCA	672
CYR1 (1)	5073	118 20 63.97 50.00	CATATCGACGACGACGACAAGCATATGCTCGAGGATGGCAATCATGGGGATCA	CATATCGACGACGACGACAAGCATATGCTCGAG	GATGGCAATCATGGGGATCA	1671 21 62.81 47.62	ATCTTAAGCGTAATCCGGAACATCGTATGGGTATTTGTTGACTGCTTCCGGGTA	ATCTTAAGCGTAATCCGGAACATCGTATGGGTA	TTTGTTGACTGCTTCCGGGTA	1554
CYR1 (2)	5073	1855 23 64.59 43.48	CATATCGACGACGACGACAAGCATATGCTCGAGTCCAACGTTGACGTATTGGGAAT	CATATCGACGACGACGACAAGCATATGCTCGAG	TCCAACGTTGACGTATTGGGAAT	3390 22 65.16 54.55	ATCTTAAGCGTAATCCGGAACATCGTATGGGTACACGGTACAACCAGCGTTACCA	ATCTTAAGCGTAATCCGGAACATCGTATGGGTA	CACGGTACAACCAGCGTTACCA	1536
CYR1 (3)	5073	3445 22 63.71 50.00	CATATCGACGACGACGACAAGCATATGCTCGAGGAGGCGTTACTTTGCAGGAACA	CATATCGACGACGACGACAAGCATATGCTCGAG	GAGGCGTTACTTTGCAGGAACA	4986 22 64.09 40.91	ATCTTAAGCGTAATCCGGAACATCGTATGGGTACCCGCCATTTCCTTTAATTTGA	ATCTTAAGCGTAATCCGGAACATCGTATGGGTA	CCCGCCATTTCCTTTAATTTGA	1542
DAL52	1641	178 21 63.39 47.62	CATATCGACGACGACGACAAGCATATGCTCGAGGTTGATCAAGCCATGGAAGCA	CATATCGACGACGACGACAAGCATATGCTCGAG	GTTGATCAAGCCATGGAAGCA	1458 23 63.16 39.13	ATCTTAAGCGTAATCCGGAACATCGTATGGGTAGACAATGGCAATTTTAGCACCAA	ATCTTAAGCGTAATCCGGAACATCGTATGGGTA	GACAATGGCAATTTTAGCACCAA	1281
DFG5	1356	205 20 64.84 55.00	CATATCGACGACGACGACAAGCATATGCTCGAGGGAGAAGCCTTTGGCGGTTT	CATATCGACGACGACGACAAGCATATGCTCGAG	GGAGAAGCCTTTGGCGGTTT	1299 20 63.89 55.00	ATCTTAAGCGTAATCCGGAACATCGTATGGGTATACACCAGCACCCGCTTTGT	ATCTTAAGCGTAATCCGGAACATCGTATGGGTA	TACACCAGCACCCGCTTTGT	1095
EBP1	1224	127 22 63.57 45.45	CATATCGACGACGACGACAAGCATATGCTCGAGATTGCTTATGTCCCAACCACCA	CATATCGACGACGACGACAAGCATATGCTCGAG	ATTGCTTATGTCCCAACCACCA	1221 24 64.99 41.67	ATCTTAAGCGTAATCCGGAACATCGTATGGGTATGCCAATGGTTTACCAATGACTTG	ATCTTAAGCGTAATCCGGAACATCGTATGGGTA	TGCCAATGGTTTACCAATGACTTG	1095
ECE1	816	61 23 64.96 43.48	CATATCGACGACGACGACAAGCATATGCTCGAGATCCACCATGCTCCAGAATTCAA	CATATCGACGACGACGACAAGCATATGCTCGAG	ATCCACCATGCTCCAGAATTCAA	702 20 63.90 60.00	ATCTTAAGCGTAATCCGGAACATCGTATGGGTATGCTACTGAGCCGGCATCTC	ATCTTAAGCGTAATCCGGAACATCGTATGGGTA	TGCTACTGAGCCGGCATCTC	642
ECM331	1242	166 20 64.45 60.00	CATATCGACGACGACGACAAGCATATGCTCGAGTCCGGTAGCGGAATCGGTAG	CATATCGACGACGACGACAAGCATATGCTCGAG	TCCGGTAGCGGAATCGGTAG	1098 23 64.36 43.48	ATCTTAAGCGTAATCCGGAACATCGTATGGGTATTGTGTGCTTGATCCTGATTTGG	ATCTTAAGCGTAATCCGGAACATCGTATGGGTA	TTGTGTGCTTGATCCTGATTTGG	933
EFG1	1578	19 27 63.27 33.33	CATATCGACGACGACGACAAGCATATGCTCGAGCCCTATTACAATCAAATGAACGGAAAT	CATATCGACGACGACGACAAGCATATGCTCGAG	CCCTATTACAATCAAATGAACGGAAAT	1575 23 64.41 47.83	ATCTTAAGCGTAATCCGGAACATCGTATGGGTAATGACTGAACTTGGGGTGATTGG	ATCTTAAGCGTAATCCGGAACATCGTATGGGTA	ATGACTGAACTTGGGGTGATTGG	1557
EFT2 (1)	2529	142 19 65.29 63.16	CATATCGACGACGACGACAAGCATATGCTCGAGGCTGCCAAGGCTGGTGATG	CATATCGACGACGACGACAAGCATATGCTCGAG	GCTGCCAAGGCTGGTGATG	1257 24 62.19 41.67	ATCTTAAGCGTAATCCGGAACATCGTATGGGTATTGGTAGTTTGGACCTTGGATTCT	ATCTTAAGCGTAATCCGGAACATCGTATGGGTA	TTGGTAGTTTGGACCTTGGATTCT	1116
EFT2 (2)	2529	1294 25 65.06 40.00	CATATCGACGACGACGACAAGCATATGCTCGAGCAAAGAACCGTTTTGATGATGGGTA	CATATCGACGACGACGACAAGCATATGCTCGAG	CAAAGAACCGTTTTGATGATGGGTA	2418 22 63.69 45.45	ATCTTAAGCGTAATCCGGAACATCGTATGGGTAACCGGACATAACTTGCCAATGA	ATCTTAAGCGTAATCCGGAACATCGTATGGGTA	ACCGGACATAACTTGCCAATGA	1125
ENO1	1323	10 21 64.48 52.38	CATATCGACGACGACGACAAGCATATGCTCGAGGCCACTAAAATCCACGCCAGA	CATATCGACGACGACGACAAGCATATGCTCGAG	GCCACTAAAATCCACGCCAGA	1320 24 62.31 37.50	ATCTTAAGCGTAATCCGGAACATCGTATGGGTACAATTGAGAAGCCTTTTGGAAATC	ATCTTAAGCGTAATCCGGAACATCGTATGGGTA	CAATTGAGAAGCCTTTTGGAAATC	1311
ERG25	927	199 25 62.75 40.00	CATATCGACGACGACGACAAGCATATGCTCGAGTTTGGTAGATGTTTACCATGGGCTA	CATATCGACGACGACGACAAGCATATGCTCGAG	TTTGGTAGATGTTTACCATGGGCTA	858 20 63.85 55.00	ATCTTAAGCGTAATCCGGAACATCGTATGGGTATGGACCAGCTTCGGTATCCA	ATCTTAAGCGTAATCCGGAACATCGTATGGGTA	TGGACCAGCTTCGGTATCCA	660
ERG7	2187	163 20 65.59 55.00	CATATCGACGACGACGACAAGCATATGCTCGAGTTTCCATCTCCGCCATCGTC	CATATCGACGACGACGACAAGCATATGCTCGAG	TTTCCATCTCCGCCATCGTC	1887 20 64.89 55.00	ATCTTAAGCGTAATCCGGAACATCGTATGGGTATGACCATCCACCGTCTGGAA	ATCTTAAGCGTAATCCGGAACATCGTATGGGTA	TGACCATCCACCGTCTGGAA	1725
EXG2	1440	259 20 64.57 50.00	CATATCGACGACGACGACAAGCATATGCTCGAGGGTGCCAAAGAAGCCGAAAA	CATATCGACGACGACGACAAGCATATGCTCGAG	GGTGCCAAAGAAGCCGAAAA	1389 20 65.77 55.00	ATCTTAAGCGTAATCCGGAACATCGTATGGGTATGACGCAATGGCTGAAGCAC	ATCTTAAGCGTAATCCGGAACATCGTATGGGTA	TGACGCAATGGCTGAAGCAC	1131
FCY21	1527	139 24 62.56 33.33	CATATCGACGACGACGACAAGCATATGCTCGAGTGGGCACATAAATTAAATGCTGAA	CATATCGACGACGACGACAAGCATATGCTCGAG	TGGGCACATAAATTAAATGCTGAA	1485 24 63.76 41.67	ATCTTAAGCGTAATCCGGAACATCGTATGGGTACCCAATAAAGGCAAATCCAATAGC	ATCTTAAGCGTAATCCGGAACATCGTATGGGTA	CCCAATAAAGGCAAATCCAATAGC	1347
FET3	1860	244 22 64.12 50.00	CATATCGACGACGACGACAAGCATATGCTCGAGCACGGTTTATTCCAGCACGGTA	CATATCGACGACGACGACAAGCATATGCTCGAG	CACGGTTTATTCCAGCACGGTA	1764 22 63.74 40.91	ATCTTAAGCGTAATCCGGAACATCGTATGGGTATTCTTCAACATCGGCAATGTCA	ATCTTAAGCGTAATCCGGAACATCGTATGGGTA	TTCTTCAACATCGGCAATGTCA	1521
FET33	1863	115 25 64.08 36.00	CATATCGACGACGACGACAAGCATATGCTCGAGATTCATCCTCGAAGAATGATTGGAA	CATATCGACGACGACGACAAGCATATGCTCGAG	ATTCATCCTCGAAGAATGATTGGAA	1641 23 65.42 47.83	ATCTTAAGCGTAATCCGGAACATCGTATGGGTAACCAGCAGCATTCCCCTTAATTG	ATCTTAAGCGTAATCCGGAACATCGTATGGGTA	ACCAGCAGCATTCCCCTTAATTG	1527
FET35	1203	139 23 63.85 47.83	CATATCGACGACGACGACAAGCATATGCTCGAGGCCTTCATGCAACGTGTTGATAC	CATATCGACGACGACGACAAGCATATGCTCGAG	GCCTTCATGCAACGTGTTGATAC	1176 21 64.71 57.14	ATCTTAAGCGTAATCCGGAACATCGTATGGGTAACCAGTTGCAGCCTGCTCAGT	ATCTTAAGCGTAATCCGGAACATCGTATGGGTA	ACCAGTTGCAGCCTGCTCAGT	1038
FET99	1881	106 22 64.62 50.00	CATATCGACGACGACGACAAGCATATGCTCGAGAATCCTGACGGGGTTTTTCCTC	CATATCGACGACGACGACAAGCATATGCTCGAG	AATCCTGACGGGGTTTTTCCTC	1716 21 65.42 42.86	ATCTTAAGCGTAATCCGGAACATCGTATGGGTATCCCAAAAATGCGGCAATACA	ATCTTAAGCGTAATCCGGAACATCGTATGGGTA	TCCCAAAAATGCGGCAATACA	1611
FGR2	1545	193 24 65.41 50.00	CATATCGACGACGACGACAAGCATATGCTCGAGGGAATGGGATATTGGACGGATACC	CATATCGACGACGACGACAAGCATATGCTCGAG	GGAATGGGATATTGGACGGATACC	1494 23 65.74 47.83	ATCTTAAGCGTAATCCGGAACATCGTATGGGTACCCAATCACTCCAACAAATGCAC	ATCTTAAGCGTAATCCGGAACATCGTATGGGTA	CCCAATCACTCCAACAAATGCAC	1302
FGR28	1845	188 21 64.74 52.38	CATATCGACGACGACGACAAGCATATGCTCGAGGCGATCTGGACTCCGAAACAA	CATATCGACGACGACGACAAGCATATGCTCGAG	GCGATCTGGACTCCGAAACAA	1822 20 64.48 55.00	ATCTTAAGCGTAATCCGGAACATCGTATGGGTACACCACCGGCATCTTCTTCA	ATCTTAAGCGTAATCCGGAACATCGTATGGGTA	CACCACCGGCATCTTCTTCA	1635
FGR38	2136	223 21 64.21 47.62	CATATCGACGACGACGACAAGCATATGCTCGAGTCCGAATGCGACTGCAATATG	CATATCGACGACGACGACAAGCATATGCTCGAG	TCCGAATGCGACTGCAATATG	2037 22 65.05 50.00	ATCTTAAGCGTAATCCGGAACATCGTATGGGTAATCCGGACTAAACACGCTTCCA	ATCTTAAGCGTAATCCGGAACATCGTATGGGTA	ATCCGGACTAAACACGCTTCCA	1815
FLC1 (1) (IPF4012)	2427	265 26 64.56 34.62	CATATCGACGACGACGACAAGCATATGCTCGAGATAAATGTTTGTTCCTTGGGTTGGAA	CATATCGACGACGACGACAAGCATATGCTCGAG	ATAAATGTTTGTTCCTTGGGTTGGAA	1164 25 66.00 40.00	ATCTTAAGCGTAATCCGGAACATCGTATGGGTACAATTGAGTCGATCCAATGGCAATA	ATCTTAAGCGTAATCCGGAACATCGTATGGGTA	CAATTGAGTCGATCCAATGGCAATA	900
FLC1 (2) (IPF4012)	2427	1243 21 65.80 52.38	CATATCGACGACGACGACAAGCATATGCTCGAGTTATTGGGGGTGTTGGGATGG	CATATCGACGACGACGACAAGCATATGCTCGAG	TTATTGGGGGTGTTGGGATGG	2415 19 64.98 57.89	ATCTTAAGCGTAATCCGGAACATCGTATGGGTATTTGGTGTGGGGTGGGTTG	ATCTTAAGCGTAATCCGGAACATCGTATGGGTA	TTTGGTGTGGGGTGGGTTG	1173
FRE10	2121	304 21 62.37 42.86	CATATCGACGACGACGACAAGCATATGCTCGAGGCTTGGAAAAATGCCACTGAA	CATATCGACGACGACGACAAGCATATGCTCGAG	GCTTGGAAAAATGCCACTGAA	2088 22 62.81 40.91	ATCTTAAGCGTAATCCGGAACATCGTATGGGTATCTGTGGTTGGAATTGCTCAAA	ATCTTAAGCGTAATCCGGAACATCGTATGGGTA	TCTGTGGTTGGAATTGCTCAAA	1785
FTR1	1146	205 20 64.34 55.00	CATATCGACGACGACGACAAGCATATGCTCGAG205 20 64.34 55.00	CATATCGACGACGACGACAAGCATATGCTCGAG	205 20 64.34 55.00	1104 24 64.97 45.83	ATCTTAAGCGTAATCCGGAACATCGTATGGGTATTCATCAACTTCTGCAGCTTGACC	ATCTTAAGCGTAATCCGGAACATCGTATGGGTA	TTCATCAACTTCTGCAGCTTGACC	900
FTR2	1149	109 20 64.24 55.00	CATATCGACGACGACGACAAGCATATGCTCGAGTCCTCAGCAAACGGTCCAGA	CATATCGACGACGACGACAAGCATATGCTCGAG	TCCTCAGCAAACGGTCCAGA	1062 26 64.04 38.46	ATCTTAAGCGTAATCCGGAACATCGTATGGGTAGGTGAACAATTCTTCCTTTTCAGCTT	ATCTTAAGCGTAATCCGGAACATCGTATGGGTA	GGTGAACAATTCTTCCTTTTCAGCTT	954
GAP1	1749	103 23 63.79 43.48	CATATCGACGACGACGACAAGCATATGCTCGAGTCATTCAAACCAGCCTTACCACA	CATATCGACGACGACGACAAGCATATGCTCGAG	TCATTCAAACCAGCCTTACCACA	1434 20 64.34 55.00	ATCTTAAGCGTAATCCGGAACATCGTATGGGTATCCCCAAACCCCACTTTGAG	ATCTTAAGCGTAATCCGGAACATCGTATGGGTA	TCCCCAAACCCCACTTTGAG	1332
GCA1 (1)	2841	148 23 65.11 47.83	CATATCGACGACGACGACAAGCATATGCTCGAGCACAATGATTCAGCTGTCGATGC	CATATCGACGACGACGACAAGCATATGCTCGAG	CACAATGATTCAGCTGTCGATGC	1191 21 65.07 47.62	ATCTTAAGCGTAATCCGGAACATCGTATGGGTAATCATCGGTGGCATTGTTTGG	ATCTTAAGCGTAATCCGGAACATCGTATGGGTA	ATCATCGGTGGCATTGTTTGG	1044
GCA1 (2)	2841	1204 25 65.31 44.00	CATATCGACGACGACGACAAGCATATGCTCGAGTTCCACTTGGGTAATGAATCAGACG	CATATCGACGACGACGACAAGCATATGCTCGAG	TTCCACTTGGGTAATGAATCAGACG	2817 22 64.84 50.00	ATCTTAAGCGTAATCCGGAACATCGTATGGGTAAGCAAAGGCACCTTCTTTGGTG	ATCTTAAGCGTAATCCGGAACATCGTATGGGTA	AGCAAAGGCACCTTCTTTGGTG	1614
GPH1 (1)	2703	100 22 64.06 50.00	CATATCGACGACGACGACAAGCATATGCTCGAGGCAATCCCGGAATCAGCTAAAC	CATATCGACGACGACGACAAGCATATGCTCGAG	GCAATCCCGGAATCAGCTAAAC	1308 21 65.45 47.62	ATCTTAAGCGTAATCCGGAACATCGTATGGGTATGGCCATTTTTCCAAGGCTTC	ATCTTAAGCGTAATCCGGAACATCGTATGGGTA	TGGCCATTTTTCCAAGGCTTC	1209
GPH1 (2)	2703	1447 23 64.34 43.48	CATATCGACGACGACGACAAGCATATGCTCGAGCCAAAATCGGTCAGAATGGCTTA	CATATCGACGACGACGACAAGCATATGCTCGAG	CCAAAATCGGTCAGAATGGCTTA	2679 25 64.14 36.00	ATCTTAAGCGTAATCCGGAACATCGTATGGGTACCAAATGTTTTCAGCATATTCGTCA	ATCTTAAGCGTAATCCGGAACATCGTATGGGTA	CCAAATGTTTTCAGCATATTCGTCA	1233
GPR1 (1)	2472	103 23 63.88 52.17	CATATCGACGACGACGACAAGCATATGCTCGAGGTATCTGCAGCCACAGCAACAGT	CATATCGACGACGACGACAAGCATATGCTCGAG	GTATCTGCAGCCACAGCAACAGT	1104 20 64.45 60.00	ATCTTAAGCGTAATCCGGAACATCGTATGGGTATCGGTGGGGGCTAGCTATTG	ATCTTAAGCGTAATCCGGAACATCGTATGGGTA	TCGGTGGGGGCTAGCTATTG	1002
GPR1 (2)	2472	1153 23 64.70 43.48	CATATCGACGACGACGACAAGCATATGCTCGAGGAATTGGCAGAAGCATTGGAAGA	CATATCGACGACGACGACAAGCATATGCTCGAG	GAATTGGCAGAAGCATTGGAAGA	2445 25 65.61 36.00	ATCTTAAGCGTAATCCGGAACATCGTATGGGTATTCCATCAAATCCAATTCTCCATCA	ATCTTAAGCGTAATCCGGAACATCGTATGGGTA	TTCCATCAAATCCAATTCTCCATCA	1293
GSC1 (1) (FKS1)	5694	106 21 63.38 47.62	CATATCGACGACGACGACAAGCATATGCTCGAGATGGGTCAACAACCACACCAA	CATATCGACGACGACGACAAGCATATGCTCGAG	ATGGGTCAACAACCACACCAA	1899 21 63.22 42.86	ATCTTAAGCGTAATCCGGAACATCGTATGGGTAGGCAAGGAAAACCAAAAACCA	ATCTTAAGCGTAATCCGGAACATCGTATGGGTA	GGCAAGGAAAACCAAAAACCA	1794
GSC1 (2) (FKS1)	5694	2173 22 62.01 40.91	CATATCGACGACGACGACAAGCATATGCTCGAGTTCACCAGATTGCCAAAGAGAA	CATATCGACGACGACGACAAGCATATGCTCGAG	TTCACCAGATTGCCAAAGAGAA	3603 21 62.33 42.86	ATCTTAAGCGTAATCCGGAACATCGTATGGGTAATCCGGATGACCATAATGCAA	ATCTTAAGCGTAATCCGGAACATCGTATGGGTA	ATCCGGATGACCATAATGCAA	1431
GSL2 (1)	4923	301 21 64.24 47.62	CATATCGACGACGACGACAAGCATATGCTCGAGTTGATTTGGGGTGAAGCCAAC	CATATCGACGACGACGACAAGCATATGCTCGAG	TTGATTTGGGGTGAAGCCAAC	1734 21 63.93 57.14	ATCTTAAGCGTAATCCGGAACATCGTATGGGTACCCTTCAACTCCGGGGTTATC	ATCTTAAGCGTAATCCGGAACATCGTATGGGTA	CCCTTCAACTCCGGGGTTATC	1434
GSL2 (2)	4923	1813 21 64.07 52.38	CATATCGACGACGACGACAAGCATATGCTCGAGGCAGAAGCACAGCGAAGGATT	CATATCGACGACGACGACAAGCATATGCTCGAG	GCAGAAGCACAGCGAAGGATT	3147 20 65.90 60.00	ATCTTAAGCGTAATCCGGAACATCGTATGGGTATTGCTCACCCATCCCTGCTC	ATCTTAAGCGTAATCCGGAACATCGTATGGGTA	TTGCTCACCCATCCCTGCTC	1335
GSL2 (3)	4923	3274 23 63.61 43.48	CATATCGACGACGACGACAAGCATATGCTCGAGTTGCTTGTTGGTGCTAATCTTGC	CATATCGACGACGACGACAAGCATATGCTCGAG	TTGCTTGTTGGTGCTAATCTTGC	4875 23 64.18 47.83	ATCTTAAGCGTAATCCGGAACATCGTATGGGTAAGGAGCATCGTAGGGTTGAAACA	ATCTTAAGCGTAATCCGGAACATCGTATGGGTA	AGGAGCATCGTAGGGTTGAAACA	1602
HEM13	972	145 21 65.20 57.14	CATATCGACGACGACGACAAGCATATGCTCGAGGGTGACAATGGTGGTGGTGGT	CATATCGACGACGACGACAAGCATATGCTCGAG	GGTGACAATGGTGGTGGTGGT	891 20 64.34 55.00	ATCTTAAGCGTAATCCGGAACATCGTATGGGTACCAACTTGCGGTTGCTGGTA	ATCTTAAGCGTAATCCGGAACATCGTATGGGTA	CCAACTTGCGGTTGCTGGTA	747
HEX1	1689	151 21 63.72 57.14	CATATCGACGACGACGACAAGCATATGCTCGAGGCCAACACCTCCTGTCCACTT	CATATCGACGACGACGACAAGCATATGCTCGAG	GCCAACACCTCCTGTCCACTT	1551 20 66.16 65.00	ATCTTAAGCGTAATCCGGAACATCGTATGGGTACCCTCTGTGGTGTCCGTTGG	ATCTTAAGCGTAATCCGGAACATCGTATGGGTA	CCCTCTGTGGTGTCCGTTGG	1401
HGT1	1638	151 23 64.02 43.48	CATATCGACGACGACGACAAGCATATGCTCGAGTCTGCCTTTATTGGTGCTGAACA	CATATCGACGACGACGACAAGCATATGCTCGAG	TCTGCCTTTATTGGTGCTGAACA	1551 20 65.50 55.00	ATCTTAAGCGTAATCCGGAACATCGTATGGGTATTCGGCATCGGAGGCAATAG	ATCTTAAGCGTAATCCGGAACATCGTATGGGTA	TTCGGCATCGGAGGCAATAG	1401
HGT10	1641	130 22 64.35 45.45	CATATCGACGACGACGACAAGCATATGCTCGAGATGGCCGGATTAATTTCTGCTG	CATATCGACGACGACGACAAGCATATGCTCGAG	ATGGCCGGATTAATTTCTGCTG	1479 23 65.04 52.17	ATCTTAAGCGTAATCCGGAACATCGTATGGGTAAGCAGCAACTCTCCATGGTTGTC	ATCTTAAGCGTAATCCGGAACATCGTATGGGTA	AGCAGCAACTCTCCATGGTTGTC	1350
HGT12	1581	100 23 65.58 43.48	CATATCGACGACGACGACAAGCATATGCTCGAGGCTTTTGGTGGGTTTTTGTTTGG	CATATCGACGACGACGACAAGCATATGCTCGAG	GCTTTTGGTGGGTTTTTGTTTGG	1557 22 64.79 40.91	ATCTTAAGCGTAATCCGGAACATCGTATGGGTAAACCATTTCGGCTTTTCCATCA	ATCTTAAGCGTAATCCGGAACATCGTATGGGTA	AACCATTTCGGCTTTTCCATCA	1458
HGT13	1659	154 26 64.75 38.46	CATATCGACGACGACGACAAGCATATGCTCGAGGCTGGTGTTGGATTCTTTTTATTTGG	CATATCGACGACGACGACAAGCATATGCTCGAG	GCTGGTGTTGGATTCTTTTTATTTGG	1572 22 64.85 50.00	ATCTTAAGCGTAATCCGGAACATCGTATGGGTAGGCAACAACTTCCCATGGTTTC	ATCTTAAGCGTAATCCGGAACATCGTATGGGTA	GGCAACAACTTCCCATGGTTTC	1419
HGT14	1779	157 24 63.65 50.00	CATATCGACGACGACGACAAGCATATGCTCGAGGTGGAAGATAGACCAACTCCACCA	CATATCGACGACGACGACAAGCATATGCTCGAG	GTGGAAGATAGACCAACTCCACCA	1773 25 64.49 40.00	ATCTTAAGCGTAATCCGGAACATCGTATGGGTATTCCTCTTTGTTGACCAAAATGTCC	ATCTTAAGCGTAATCCGGAACATCGTATGGGTA	TTCCTCTTTGTTGACCAAAATGTCC	1617
HGT15	1665	100 23 63.28 47.83	CATATCGACGACGACGACAAGCATATGCTCGAGTCTGCTAAAGGGTTGCTACGTGA	CATATCGACGACGACGACAAGCATATGCTCGAG	TCTGCTAAAGGGTTGCTACGTGA	1614 23 63.89 39.13	ATCTTAAGCGTAATCCGGAACATCGTATGGGTATGACAATTGTGCAGCTTGTTTCA	ATCTTAAGCGTAATCCGGAACATCGTATGGGTA	TGACAATTGTGCAGCTTGTTTCA	1515
HGT16	1521	112 20 63.52 60.00	CATATCGACGACGACGACAAGCATATGCTCGAGTTGCTGGCACCTCCTACACC	CATATCGACGACGACGACAAGCATATGCTCGAG	TTGCTGGCACCTCCTACACC	1518 20 66.78 55.00	ATCTTAAGCGTAATCCGGAACATCGTATGGGTACAATTGGAACACCGCCATGC	ATCTTAAGCGTAATCCGGAACATCGTATGGGTA	CAATTGGAACACCGCCATGC	1407
HGT17	1839	148 23 64.35 39.13	CATATCGACGACGACGACAAGCATATGCTCGAGGATCATCCGCCAGAAATTTTCAA	CATATCGACGACGACGACAAGCATATGCTCGAG	GATCATCCGCCAGAAATTTTCAA	1770 25 64.07 44.00	ATCTTAAGCGTAATCCGGAACATCGTATGGGTATGTTGGCTTACCACTATCGAGTTCA	ATCTTAAGCGTAATCCGGAACATCGTATGGGTA	TGTTGGCTTACCACTATCGAGTTCA	1623
HGT2	1638	142 22 64.62 50.00	CATATCGACGACGACGACAAGCATATGCTCGAGTCCTCCATGTCTGCCTTCATTG	CATATCGACGACGACGACAAGCATATGCTCGAG	TCCTCCATGTCTGCCTTCATTG	1551 20 65.50 55.00	ATCTTAAGCGTAATCCGGAACATCGTATGGGTATTCGGCATCGGAGGCAATAG	ATCTTAAGCGTAATCCGGAACATCGTATGGGTA	TTCGGCATCGGAGGCAATAG	1410
HGT20	1512	130 23 65.27 52.17	CATATCGACGACGACGACAAGCATATGCTCGAGGCACCTGCAGATGTGTTGTCTTG	CATATCGACGACGACGACAAGCATATGCTCGAG	GCACCTGCAGATGTGTTGTCTTG	1443 22 63.46 50.00	ATCTTAAGCGTAATCCGGAACATCGTATGGGTATCCGAAACCGTACACCAAAGAG	ATCTTAAGCGTAATCCGGAACATCGTATGGGTA	TCCGAAACCGTACACCAAAGAG	1314
HGT3	1944	280 20 65.23 60.00	CATATCGACGACGACGACAAGCATATGCTCGAGGGAAGGAAACGTGCCACTCG	CATATCGACGACGACGACAAGCATATGCTCGAG	GGAAGGAAACGTGCCACTCG	1917 23 65.21 43.48	ATCTTAAGCGTAATCCGGAACATCGTATGGGTAATCATTGGGTTGTCCCTTTTTCG	ATCTTAAGCGTAATCCGGAACATCGTATGGGTA	ATCATTGGGTTGTCCCTTTTTCG	1638
HGT6	1653	169 22 63.85 40.91	CATATCGACGACGACGACAAGCATATGCTCGAGATTGCCTTTGGTGGTTTCGTTT	CATATCGACGACGACGACAAGCATATGCTCGAG	ATTGCCTTTGGTGGTTTCGTTT	1578 20 65.42 55.00	ATCTTAAGCGTAATCCGGAACATCGTATGGGTAAACCCAACCGGCTGATTTCC	ATCTTAAGCGTAATCCGGAACATCGTATGGGTA	AACCCAACCGGCTGATTTCC	1410
HGT7	1641	160 22 64.78 45.45	CATATCGACGACGACGACAAGCATATGCTCGAGGCCTTTGGTGGTTTCGTTTTTG	CATATCGACGACGACGACAAGCATATGCTCGAG	GCCTTTGGTGGTTTCGTTTTTG	1623 20 64.75 50.00	ATCTTAAGCGTAATCCGGAACATCGTATGGGTATGGTTTGGCATCACCAGCAT	ATCTTAAGCGTAATCCGGAACATCGTATGGGTA	TGGTTTGGCATCACCAGCAT	1464
HGT8	1650	112 21 64.99 52.38	CATATCGACGACGACGACAAGCATATGCTCGAGGCCTTGGCCAAAAAGCCTATG	CATATCGACGACGACGACAAGCATATGCTCGAG	GCCTTGGCCAAAAAGCCTATG	1626 20 65.81 60.00	ATCTTAAGCGTAATCCGGAACATCGTATGGGTAGGCATCACCCGCATAACCAG	ATCTTAAGCGTAATCCGGAACATCGTATGGGTA	GGCATCACCCGCATAACCAG	1515
HGT9	1722	190 25 63.45 36.00	CATATCGACGACGACGACAAGCATATGCTCGAGATGCATTCTTTTGGTGAAACTGTTG	CATATCGACGACGACGACAAGCATATGCTCGAG	ATGCATTCTTTTGGTGAAACTGTTG	1722 25 63.77 40.00	ATCTTAAGCGTAATCCGGAACATCGTATGGGTATCATTCACTGTGTGCTTCTTTTTCC	ATCTTAAGCGTAATCCGGAACATCGTATGGGTA	TCATTCACTGTGTGCTTCTTTTTCC	1533
HIS1	897	22 25 64.90 44.00	CATATCGACGACGACGACAAGCATATGCTCGAGCCAGACCGTTTGTTATTTGCTGTTC	CATATCGACGACGACGACAAGCATATGCTCGAG	CCAGACCGTTTGTTATTTGCTGTTC	861 22 64.87 50.00	ATCTTAAGCGTAATCCGGAACATCGTATGGGTAATCGGTTGCACCAGCTTTCTTC	ATCTTAAGCGTAATCCGGAACATCGTATGGGTA	ATCGGTTGCACCAGCTTTCTTC	840
HSP70 (SSA1)	1971	106 22 64.93 45.45	CATATCGACGACGACGACAAGCATATGCTCGAGACCCCTTCATTTGTTGCCTTCA	CATATCGACGACGACGACAAGCATATGCTCGAG	ACCCCTTCATTTGTTGCCTTCA	1842 20 65.61 60.00	ATCTTAAGCGTAATCCGGAACATCGTATGGGTAACCGGCAGCACCATAAGCAC	ATCTTAAGCGTAATCCGGAACATCGTATGGGTA	ACCGGCAGCACCATAAGCAC	1737
HSP90	2124	169 20 64.10 50.00	CATATCGACGACGACGACAAGCATATGCTCGAGTCCCAATTGGAATCCGAACC	CATATCGACGACGACGACAAGCATATGCTCGAG	TCCCAATTGGAATCCGAACC	1992 21 65.44 52.38	ATCTTAAGCGTAATCCGGAACATCGTATGGGTATCTGTGGGCAAAGTTGGATGG	ATCTTAAGCGTAATCCGGAACATCGTATGGGTA	TCTGTGGGCAAAGTTGGATGG	1824
HST6 (1)	3972	163 21 65.20 47.62	CATATCGACGACGACGACAAGCATATGCTCGAGTCAGCAATTGCCACACCAATG	CATATCGACGACGACGACAAGCATATGCTCGAG	TCAGCAATTGCCACACCAATG	1896 20 64.48 55.00	ATCTTAAGCGTAATCCGGAACATCGTATGGGTAATCGCCATCCGGTAGCTTTG	ATCTTAAGCGTAATCCGGAACATCGTATGGGTA	ATCGCCATCCGGTAGCTTTG	1734
HWP1	1905	139 24 63.80 41.67	CATATCGACGACGACGACAAGCATATGCTCGAGCCATGTGATGATTACCCACAACAA	CATATCGACGACGACGACAAGCATATGCTCGAG	CCATGTGATGATTACCCACAACAA	1875 23 65.55 47.83	ATCTTAAGCGTAATCCGGAACATCGTATGGGTAAGCAGCACCGAAAGTCAATCTCA	ATCTTAAGCGTAATCCGGAACATCGTATGGGTA	AGCAGCACCGAAAGTCAATCTCA	1737
HYR1 (1.1)	2760	133 23 63.23 52.17	CATATCGACGACGACGACAAGCATATGCTCGAGGGTGCTACTTGGGCTATTCTTGG	CATATCGACGACGACGACAAGCATATGCTCGAG	GGTGCTACTTGGGCTATTCTTGG	1287 19 65.15 57.89	ATCTTAAGCGTAATCCGGAACATCGTATGGGTAAGCAATGGCGGTGGAGGAT	ATCTTAAGCGTAATCCGGAACATCGTATGGGTA	AGCAATGGCGGTGGAGGAT	1155
HYR1 (1.2)	2760	133 23 63.23 52.17	CATATCGACGACGACGACAAGCATATGCTCGAGGGTGCTACTTGGGCTATTCTTGG	CATATCGACGACGACGACAAGCATATGCTCGAG	GGTGCTACTTGGGCTATTCTTGG	1284 20 64.40 55.00	ATCTTAAGCGTAATCCGGAACATCGTATGGGTAGATGGCGGTGGAGGATGATT	ATCTTAAGCGTAATCCGGAACATCGTATGGGTA	GATGGCGGTGGAGGATGATT	1152
HYR1 (2)	2760	1423 22 63.86 54.55	CATATCGACGACGACGACAAGCATATGCTCGAGAGCATCACGTCAAGTCCTGGTC	CATATCGACGACGACGACAAGCATATGCTCGAG	AGCATCACGTCAAGTCCTGGTC	2640 24 64.03 41.67	ATCTTAAGCGTAATCCGGAACATCGTATGGGTATGTGTTTGATGGCATAGAATGTGG	ATCTTAAGCGTAATCCGGAACATCGTATGGGTA	TGTGTTTGATGGCATAGAATGTGG	1218
HYR3 (1)	3750	121 20 63.70 60.00	CATATCGACGACGACGACAAGCATATGCTCGAGACTGTCAACCTGGGGGCTTC	CATATCGACGACGACGACAAGCATATGCTCGAG	ACTGTCAACCTGGGGGCTTC	1737 22 64.66 50.00	ATCTTAAGCGTAATCCGGAACATCGTATGGGTAACTGGCTGAAGATGAAGCAGCA	ATCTTAAGCGTAATCCGGAACATCGTATGGGTA	ACTGGCTGAAGATGAAGCAGCA	1617
HYR3 (2)	3750	1768 23 63.95 47.83	CATATCGACGACGACGACAAGCATATGCTCGAGTCATCTGCTGTTCCATCTTCTGC	CATATCGACGACGACGACAAGCATATGCTCGAG	TCATCTGCTGTTCCATCTTCTGC	3636 20 65.03 60.00	ATCTTAAGCGTAATCCGGAACATCGTATGGGTATGAGCCGGAGTCAGCACTTG	ATCTTAAGCGTAATCCGGAACATCGTATGGGTA	TGAGCCGGAGTCAGCACTTG	1869
IFF3 (1)	2826	121 21 65.38 57.14	CATATCGACGACGACGACAAGCATATGCTCGAGACCATTTACCCTGGGGCTTCC	CATATCGACGACGACGACAAGCATATGCTCGAG	ACCATTTACCCTGGGGCTTCC	1323 23 66.17 47.83	ATCTTAAGCGTAATCCGGAACATCGTATGGGTATGGAGCAGAAGATGGTTCCCAAT	ATCTTAAGCGTAATCCGGAACATCGTATGGGTA	TGGAGCAGAAGATGGTTCCCAAT	1203
IFF3 (2)	2826	1405 23 65.81 52.17	CATATCGACGACGACGACAAGCATATGCTCGAGACCGTATTTTCCAGCGAGTCTGC	CATATCGACGACGACGACAAGCATATGCTCGAG	ACCGTATTTTCCAGCGAGTCTGC	2808 22 63.34 45.45	ATCTTAAGCGTAATCCGGAACATCGTATGGGTATCCGAAAACTACCAATGCCAAG	ATCTTAAGCGTAATCCGGAACATCGTATGGGTA	TCCGAAAACTACCAATGCCAAG	1404
IFF4 (1)	4581	121 20 65.51 55.00	CATATCGACGACGACGACAAGCATATGCTCGAGATCATTCACCCAGGCGCATC	CATATCGACGACGACGACAAGCATATGCTCGAG	ATCATTCACCCAGGCGCATC	2028 23 63.64 47.83	ATCTTAAGCGTAATCCGGAACATCGTATGGGTAAAGGGAGCTTTCACTGGAGACAA	ATCTTAAGCGTAATCCGGAACATCGTATGGGTA	AAGGGAGCTTTCACTGGAGACAA	1908
IFF4 (2)	4581	2266 20 64.31 60.00	CATATCGACGACGACGACAAGCATATGCTCGAGAGCGAGCCAGCTCCTGAAAC	CATATCGACGACGACGACAAGCATATGCTCGAG	AGCGAGCCAGCTCCTGAAAC	4077 20 63.61 55.00	ATCTTAAGCGTAATCCGGAACATCGTATGGGTACGACCCACTTGGAGAAGCAA	ATCTTAAGCGTAATCCGGAACATCGTATGGGTA	CGACCCACTTGGAGAAGCAA	1812
IFF5 (1)	3927	187 24 64.87 50.00	CATATCGACGACGACGACAAGCATATGCTCGAGGATGTCAGAGCTGATGCTGGGTTA	CATATCGACGACGACGACAAGCATATGCTCGAG	GATGTCAGAGCTGATGCTGGGTTA	1989 25 63.32 36.00	ATCTTAAGCGTAATCCGGAACATCGTATGGGTATTTGGCTAACAATGATTCAGAATGG	ATCTTAAGCGTAATCCGGAACATCGTATGGGTA	TTTGGCTAACAATGATTCAGAATGG	1803
IFF5 (2)	3927	2038 26 64.82 42.31	CATATCGACGACGACGACAAGCATATGCTCGAGTCAGCTGTTCCAACTGCAAAATCTAC	CATATCGACGACGACGACAAGCATATGCTCGAG	TCAGCTGTTCCAACTGCAAAATCTAC	3855 25 63.52 36.00	ATCTTAAGCGTAATCCGGAACATCGTATGGGTATCCATTTTCATATGGCAAAGTACCA	ATCTTAAGCGTAATCCGGAACATCGTATGGGTA	TCCATTTTCATATGGCAAAGTACCA	1818
IFF6 (1)	3261	112 22 65.03 54.55	CATATCGACGACGACGACAAGCATATGCTCGAGGCCATCACCATTCACTCAGGTG	CATATCGACGACGACGACAAGCATATGCTCGAG	GCCATCACCATTCACTCAGGTG	1599 24 64.64 45.83	ATCTTAAGCGTAATCCGGAACATCGTATGGGTATTCGTCTTCAGTGGATGATTGACC	ATCTTAAGCGTAATCCGGAACATCGTATGGGTA	TTCGTCTTCAGTGGATGATTGACC	1488
IFF7 (1)	3678	130 21 64.50 52.38	CATATCGACGACGACGACAAGCATATGCTCGAGTCTGGTGCCTTTTGGTCCATC	CATATCGACGACGACGACAAGCATATGCTCGAG	TCTGGTGCCTTTTGGTCCATC	1680 23 64.54 47.83	ATCTTAAGCGTAATCCGGAACATCGTATGGGTACATTTCAGTGGTGTCAAGCGTGT	ATCTTAAGCGTAATCCGGAACATCGTATGGGTA	CATTTCAGTGGTGTCAAGCGTGT	1551
IFF7 (2)	3678	1708 22 65.16 50.00	CATATCGACGACGACGACAAGCATATGCTCGAGTACGACACCTTTGGCACCATTG	CATATCGACGACGACGACAAGCATATGCTCGAG	TACGACACCTTTGGCACCATTG	3573 20 64.39 60.00	ATCTTAAGCGTAATCCGGAACATCGTATGGGTACCCTCCAACACCGGCACTAT	ATCTTAAGCGTAATCCGGAACATCGTATGGGTA	CCCTCCAACACCGGCACTAT	1866
IFF8	2145	115 21 63.81 47.62	CATATCGACGACGACGACAAGCATATGCTCGAGATCACCATTGATTCCGGTGCT	CATATCGACGACGACGACAAGCATATGCTCGAG	ATCACCATTGATTCCGGTGCT	1971 23 64.70 43.48	ATCTTAAGCGTAATCCGGAACATCGTATGGGTATGATGATACTGATGCCACGGAAA	ATCTTAAGCGTAATCCGGAACATCGTATGGGTA	TGATGATACTGATGCCACGGAAA	1857
INT1 (1)	4986	112 23 65.20 43.48	CATATCGACGACGACGACAAGCATATGCTCGAGTTCCCCAGAACAAATTCCAAACC	CATATCGACGACGACGACAAGCATATGCTCGAG	TTCCCCAGAACAAATTCCAAACC	1965 22 64.80 54.55	ATCTTAAGCGTAATCCGGAACATCGTATGGGTAGTTGTCTGATCTTGGGGGTGCT	ATCTTAAGCGTAATCCGGAACATCGTATGGGTA	GTTGTCTGATCTTGGGGGTGCT	1854
INT1 (2)	4986	2107 20 63.84 50.00	CATATCGACGACGACGACAAGCATATGCTCGAGTTGCCCGTAGTGGAAGCAAA	CATATCGACGACGACGACAAGCATATGCTCGAG	TTGCCCGTAGTGGAAGCAAA	3867 21 64.89 47.62	ATCTTAAGCGTAATCCGGAACATCGTATGGGTAATGATGGCGATGGTGATGCTT	ATCTTAAGCGTAATCCGGAACATCGTATGGGTA	ATGATGGCGATGGTGATGCTT	1761
INT1 (3)	4986	3925 21 64.85 52.38	CATATCGACGACGACGACAAGCATATGCTCGAGGGACTGCAAGAACGAGGCAAA	CATATCGACGACGACGACAAGCATATGCTCGAG	GGACTGCAAGAACGAGGCAAA	4929 22 63.92 45.45	ATCTTAAGCGTAATCCGGAACATCGTATGGGTATGGTTGACGTCTGAACCGATTT	ATCTTAAGCGTAATCCGGAACATCGTATGGGTA	TGGTTGACGTCTGAACCGATTT	1005
JEN1	1626	295 23 64.48 47.83	CATATCGACGACGACGACAAGCATATGCTCGAGGCTTGGGCATTAGATGCTATGGA	CATATCGACGACGACGACAAGCATATGCTCGAG	GCTTGGGCATTAGATGCTATGGA	1494 19 63.72 47.37	ATCTTAAGCGTAATCCGGAACATCGTATGGGTAAGCGAAAATTGCCCCACAA	ATCTTAAGCGTAATCCGGAACATCGTATGGGTA	AGCGAAAATTGCCCCACAA	1200
KOG1 (1) (IPF4893)	4230	187 23 65.19 47.83	CATATCGACGACGACGACAAGCATATGCTCGAGGAGCGACAAAAGACCATCAATGC	CATATCGACGACGACGACAAGCATATGCTCGAG	GAGCGACAAAAGACCATCAATGC	1998 27 63.11 37.04	ATCTTAAGCGTAATCCGGAACATCGTATGGGTATTTACCTTCAGGATGTCTATTCCACAA	ATCTTAAGCGTAATCCGGAACATCGTATGGGTA	TTTACCTTCAGGATGTCTATTCCACAA	1812
KOG1 (2) (IPF4893)	4230	2071 22 65.09 45.45	CATATCGACGACGACGACAAGCATATGCTCGAGACGTCGATTCTTGTTGCGTTGA	CATATCGACGACGACGACAAGCATATGCTCGAG	ACGTCGATTCTTGTTGCGTTGA	3918 20 64.47 60.00	ATCTTAAGCGTAATCCGGAACATCGTATGGGTACCCGTCCGAGGAACCACTTA	ATCTTAAGCGTAATCCGGAACATCGTATGGGTA	CCCGTCCGAGGAACCACTTA	1848
KRE6	390	106 25 65.75 44.00	CATATCGACGACGACGACAAGCATATGCTCGAGACAGGTACTGATGCCAATGGGAAAT	CATATCGACGACGACGACAAGCATATGCTCGAG	ACAGGTACTGATGCCAATGGGAAAT	306 25 63.41 32.00	ATCTTAAGCGTAATCCGGAACATCGTATGGGTATTGATTGAATTTTGATAACCCACCA	ATCTTAAGCGTAATCCGGAACATCGTATGGGTA	TTGATTGAATTTTGATAACCCACCA	201
KRE9	816	100 26 63.99 42.31	CATATCGACGACGACGACAAGCATATGCTCGAGTTTTCTGGTAGTTCTGGATCAGCAAG	CATATCGACGACGACGACAAGCATATGCTCGAG	TTTTCTGGTAGTTCTGGATCAGCAAG	765 23 65.23 56.52	ATCTTAAGCGTAATCCGGAACATCGTATGGGTACACTCGTTCACTGGCAGGATACC	ATCTTAAGCGTAATCCGGAACATCGTATGGGTA	CACTCGTTCACTGGCAGGATACC	666
LEU2	1122	31 19 64.21 57.89	CATATCGACGACGACGACAAGCATATGCTCGAGTTGCCTGGTGACCATGTCG	CATATCGACGACGACGACAAGCATATGCTCGAG	TTGCCTGGTGACCATGTCG	1095 22 64.61 50.00	ATCTTAAGCGTAATCCGGAACATCGTATGGGTAGACTGTTTCGGCTATTGCGTCA	ATCTTAAGCGTAATCCGGAACATCGTATGGGTA	GACTGTTTCGGCTATTGCGTCA	1065
LIP1	1407	103 26 64.71 46.15	CATATCGACGACGACGACAAGCATATGCTCGAGGGGTATGAGTCAGCTAAATTGGGAGA	CATATCGACGACGACGACAAGCATATGCTCGAG	GGGTATGAGTCAGCTAAATTGGGAGA	1335 20 65.31 55.00	ATCTTAAGCGTAATCCGGAACATCGTATGGGTATGGACCCAATTCGGAACCAG	ATCTTAAGCGTAATCCGGAACATCGTATGGGTA	TGGACCCAATTCGGAACCAG	1233
LIP10	1398	106 24 66.17 45.83	CATATCGACGACGACGACAAGCATATGCTCGAGTTTGCAACTGCTAAGCCAGGTGAT	CATATCGACGACGACGACAAGCATATGCTCGAG	TTTGCAACTGCTAAGCCAGGTGAT	1173 20 65.52 60.00	ATCTTAAGCGTAATCCGGAACATCGTATGGGTAAGCAGGGGCCCCAGTAAATG	ATCTTAAGCGTAATCCGGAACATCGTATGGGTA	AGCAGGGGCCCCAGTAAATG	1068
LIP2	1401	106 22 64.46 45.45	CATATCGACGACGACGACAAGCATATGCTCGAGTTCGAATCTGCCAAGAATGGTG	CATATCGACGACGACGACAAGCATATGCTCGAG	TTCGAATCTGCCAAGAATGGTG	1326 21 64.34 52.38	ATCTTAAGCGTAATCCGGAACATCGTATGGGTATGGGGTACCGAAAACTGCTTG	ATCTTAAGCGTAATCCGGAACATCGTATGGGTA	TGGGGTACCGAAAACTGCTTG	1221
LIP3	1416	148 22 64.18 45.45	CATATCGACGACGACGACAAGCATATGCTCGAGACGCCAGGCAAAATAAGCAGTT	CATATCGACGACGACGACAAGCATATGCTCGAG	ACGCCAGGCAAAATAAGCAGTT	1386 23 63.61 47.83	ATCTTAAGCGTAATCCGGAACATCGTATGGGTACCCCATGAATCCAGTTAATCCAC	ATCTTAAGCGTAATCCGGAACATCGTATGGGTA	CCCCATGAATCCAGTTAATCCAC	1239
LIP4	1380	142 21 63.70 52.38	CATATCGACGACGACGACAAGCATATGCTCGAGACACCCAAACCCATCACTGGT	CATATCGACGACGACGACAAGCATATGCTCGAG	ACACCCAAACCCATCACTGGT	1266 22 64.83 45.45	ATCTTAAGCGTAATCCGGAACATCGTATGGGTAAATCGAAGGTGGGATGTTTGGA	ATCTTAAGCGTAATCCGGAACATCGTATGGGTA	AATCGAAGGTGGGATGTTTGGA	1125
LIP5	1392	133 20 65.34 55.00	CATATCGACGACGACGACAAGCATATGCTCGAGTCCAGGGCAACACCCAAATC	CATATCGACGACGACGACAAGCATATGCTCGAG	TCCAGGGCAACACCCAAATC	1158 21 64.51 57.14	ATCTTAAGCGTAATCCGGAACATCGTATGGGTAAGCAGGGGCACCCATAATAGC	ATCTTAAGCGTAATCCGGAACATCGTATGGGTA	AGCAGGGGCACCCATAATAGC	1026
LIP6	1392	199 20 63.90 60.00	CATATCGACGACGACGACAAGCATATGCTCGAGTGGCAGCTCTTGGTCAGGTC	CATATCGACGACGACGACAAGCATATGCTCGAG	TGGCAGCTCTTGGTCAGGTC	1251 20 66.01 55.00	ATCTTAAGCGTAATCCGGAACATCGTATGGGTAATTCGATGCCCTGGTGGTGA	ATCTTAAGCGTAATCCGGAACATCGTATGGGTA	ATTCGATGCCCTGGTGGTGA	1053
LIP7	1281	124 22 63.29 40.91	CATATCGACGACGACGACAAGCATATGCTCGAGAAATGGAGGAAAATGCCATTCC	CATATCGACGACGACGACAAGCATATGCTCGAG	AAATGGAGGAAAATGCCATTCC	1209 22 63.58 50.00	ATCTTAAGCGTAATCCGGAACATCGTATGGGTAGAGAAATGGTGCTATGCCAGGA	ATCTTAAGCGTAATCCGGAACATCGTATGGGTA	GAGAAATGGTGCTATGCCAGGA	1086
LIP8	1383	166 20 65.33 55.00	CATATCGACGACGACGACAAGCATATGCTCGAGTTTGCTCCCCTCGAGATCCA	CATATCGACGACGACGACAAGCATATGCTCGAG	TTTGCTCCCCTCGAGATCCA	1170 20 63.38 60.00	ATCTTAAGCGTAATCCGGAACATCGTATGGGTACCAAGTCAAGGCAGCAGGAG	ATCTTAAGCGTAATCCGGAACATCGTATGGGTA	CCAAGTCAAGGCAGCAGGAG	1005
LPD1	1476	13 24 63.81 37.50	CATATCGACGACGACGACAAGCATATGCTCGAGTTCAAATCTATTCCAGCCAATGGA	CATATCGACGACGACGACAAGCATATGCTCGAG	TTCAAATCTATTCCAGCCAATGGA	1452 19 65.37 63.16	ATCTTAAGCGTAATCCGGAACATCGTATGGGTAGGTGGCCAAAGCAGCTTCC	ATCTTAAGCGTAATCCGGAACATCGTATGGGTA	GGTGGCCAAAGCAGCTTCC	1440
MDR1 (BMR1)	1695	121 23 64.08 47.83	CATATCGACGACGACGACAAGCATATGCTCGAGGCCGATTACAAACCAACTCTTGC	CATATCGACGACGACGACAAGCATATGCTCGAG	GCCGATTACAAACCAACTCTTGC	1620 22 65.30 50.00	ATCTTAAGCGTAATCCGGAACATCGTATGGGTAAAGGGTGATGAAACCCAACACG	ATCTTAAGCGTAATCCGGAACATCGTATGGGTA	AAGGGTGATGAAACCCAACACG	1500
MEP3	1608	112 23 64.15 47.83	CATATCGACGACGACGACAAGCATATGCTCGAGTGGATCATGATACCGGGTTTAGC	CATATCGACGACGACGACAAGCATATGCTCGAG	TGGATCATGATACCGGGTTTAGC	1608 23 63.35 47.83	ATCTTAAGCGTAATCCGGAACATCGTATGGGTATCAACTGGGACGATATTCCACTG	ATCTTAAGCGTAATCCGGAACATCGTATGGGTA	TCAACTGGGACGATATTCCACTG	1497
MID1	1641	130 27 63.96 29.63	CATATCGACGACGACGACAAGCATATGCTCGAGTTTGATTCCAAATCATCATCTTCTTCA	CATATCGACGACGACGACAAGCATATGCTCGAG	TTTGATTCCAAATCATCATCTTCTTCA	1620 24 63.75 41.67	ATCTTAAGCGTAATCCGGAACATCGTATGGGTAAAAGGATACCACAACGATTGTCCA	ATCTTAAGCGTAATCCGGAACATCGTATGGGTA	AAAGGATACCACAACGATTGTCCA
MNN9	1107	103 21 64.93 47.62	CATATCGACGACGACGACAAGCATATGCTCGAGTCTGCCCATGGGTTTTCTTCA	CATATCGACGACGACGACAAGCATATGCTCGAG	TCTGCCCATGGGTTTTCTTCA	1002 20 66.20 55.00	ATCTTAAGCGTAATCCGGAACATCGTATGGGTATGGGAACGATGGGAACATGG	ATCTTAAGCGTAATCCGGAACATCGTATGGGTA	TGGGAACGATGGGAACATGG	900
MNT1	1296	169 20 65.30 65.00	CATATCGACGACGACGACAAGCATATGCTCGAGGGAGGTGGTGCTGGTTCAGG	CATATCGACGACGACGACAAGCATATGCTCGAG	GGAGGTGGTGCTGGTTCAGG	1056 21 64.51 52.38	ATCTTAAGCGTAATCCGGAACATCGTATGGGTATGGAGCATCACCCCATCTTTC	ATCTTAAGCGTAATCCGGAACATCGTATGGGTA	TGGAGCATCACCCCATCTTTC	888
MNT2	1386	145 21 64.37 52.38	CATATCGACGACGACGACAAGCATATGCTCGAGCTGGAAACTGTGCCACAACCA	CATATCGACGACGACGACAAGCATATGCTCGAG	CTGGAAACTGTGCCACAACCA	1146 20 62.66 50.00	ATCTTAAGCGTAATCCGGAACATCGTATGGGTAAGCATCACCCCAACGTTCAT	ATCTTAAGCGTAATCCGGAACATCGTATGGGTA	AGCATCACCCCAACGTTCAT	1002
MPD1	900	160 20 65.14 55.00	CATATCGACGACGACGACAAGCATATGCTCGAGTTTTACGCCCCTTGGTGTGG	CATATCGACGACGACGACAAGCATATGCTCGAG	TTTTACGCCCCTTGGTGTGG	825 21 64.23 52.38	ATCTTAAGCGTAATCCGGAACATCGTATGGGTATGGGCCCTCTATTGGTTGTTG	ATCTTAAGCGTAATCCGGAACATCGTATGGGTA	TGGGCCCTCTATTGGTTGTTG	666
MSB2	4230	223 22 63.34 45.45	CATATCGACGACGACGACAAGCATATGCTCGAGGGACACTTTTTCGGTCCATCAA	CATATCGACGACGACGACAAGCATATGCTCGAG	GGACACTTTTTCGGTCCATCAA	1836 19 64.85 57.89	ATCTTAAGCGTAATCCGGAACATCGTATGGGTAGCTGGTGGTTTCGGCAATG	ATCTTAAGCGTAATCCGGAACATCGTATGGGTA	GCTGGTGGTTTCGGCAATG	1614
MSS4	1473	154 20 65.02 55.00	CATATCGACGACGACGACAAGCATATGCTCGAGACGGGTTCACCACGTGCTTT	CATATCGACGACGACGACAAGCATATGCTCGAG	ACGGGTTCACCACGTGCTTT	1404 20 65.45 60.00	ATCTTAAGCGTAATCCGGAACATCGTATGGGTATCTAGCAGGAACCGCCAGGA	ATCTTAAGCGTAATCCGGAACATCGTATGGGTA	TCTAGCAGGAACCGCCAGGA	1251
NIK1 (1)	3246	181 20 64.35 50.00	CATATCGACGACGACGACAAGCATATGCTCGAGGCCAACAAAGCGTTCCAACA	CATATCGACGACGACGACAAGCATATGCTCGAG	GCCAACAAAGCGTTCCAACA	1629 24 65.66 45.83	ATCTTAAGCGTAATCCGGAACATCGTATGGGTAATGCACAATCGACAACATCTCTCG	ATCTTAAGCGTAATCCGGAACATCGTATGGGTA	ATGCACAATCGACAACATCTCTCG	1449
NIK1 (2)	3246	1633 22 64.67 40.91	CATATCGACGACGACGACAAGCATATGCTCGAGTTGGCAAATTCCTTGTTGACCA	CATATCGACGACGACGACAAGCATATGCTCGAG	TTGGCAAATTCCTTGTTGACCA	3168 20 64.81 65.00	ATCTTAAGCGTAATCCGGAACATCGTATGGGTAACCCCCTCCCTCAACAGTCC	ATCTTAAGCGTAATCCGGAACATCGTATGGGTA	ACCCCCTCCCTCAACAGTCC	1536
PCT1	1374	25 27 64.71 37.04	CATATCGACGACGACGACAAGCATATGCTCGAGACAATTGAGAAAGAACTCAATGGATCG	CATATCGACGACGACGACAAGCATATGCTCGAG	ACAATTGAGAAAGAACTCAATGGATCG	1329 27 64.09 37.04	ATCTTAAGCGTAATCCGGAACATCGTATGGGTATGGTGACTTTCTTTTTGGTGTAGTTGA	ATCTTAAGCGTAATCCGGAACATCGTATGGGTA	TGGTGACTTTCTTTTTGGTGTAGTTGA	1305
PDC11	1704	163 20 65.40 60.00	CATATCGACGACGACGACAAGCATATGCTCGAGGGTTACGCTGCCGACGGTTA	CATATCGACGACGACGACAAGCATATGCTCGAG	GGTTACGCTGCCGACGGTTA	1665 22 63.50 50.00	ATCTTAAGCGTAATCCGGAACATCGTATGGGTAAGCAACCAAGTTAGCTGGAGCA	ATCTTAAGCGTAATCCGGAACATCGTATGGGTA	AGCAACCAAGTTAGCTGGAGCA	1503
PGA12	948	133 24 64.70 41.67	CATATCGACGACGACGACAAGCATATGCTCGAGGATGACACGAACAATTTCGGTTTG	CATATCGACGACGACGACAAGCATATGCTCGAG	GATGACACGAACAATTTCGGTTTG	900 20 65.64 55.00	ATCTTAAGCGTAATCCGGAACATCGTATGGGTATGGTGGGTTGGGACACCAAT	ATCTTAAGCGTAATCCGGAACATCGTATGGGTA	TGGTGGGTTGGGACACCAAT	768
PGA13	1371	133 22 63.53 50.00	CATATCGACGACGACGACAAGCATATGCTCGAGCCAACCACTTTCACTGTGAGCA	CATATCGACGACGACGACAAGCATATGCTCGAG	CCAACCACTTTCACTGTGAGCA	1344 20 64.73 55.00	ATCTTAAGCGTAATCCGGAACATCGTATGGGTAAAAGAGCCCGAATGCTGTGG	ATCTTAAGCGTAATCCGGAACATCGTATGGGTA	AAAGAGCCCGAATGCTGTGG	1212
PGA18	2262	433 21 65.34 52.38	CATATCGACGACGACGACAAGCATATGCTCGAGTGCACCACTGGAACCAAAACC	CATATCGACGACGACGACAAGCATATGCTCGAG	TGCACCACTGGAACCAAAACC	2241 20 62.89 50.00	ATCTTAAGCGTAATCCGGAACATCGTATGGGTAACTGAGGAAACCGGCAATGA	ATCTTAAGCGTAATCCGGAACATCGTATGGGTA	ACTGAGGAAACCGGCAATGA	1809
PGA21	507	145 20 64.97 55.00	CATATCGACGACGACGACAAGCATATGCTCGAGGCCACCGCAAAAGATGTTCC	CATATCGACGACGACGACAAGCATATGCTCGAG	GCCACCGCAAAAGATGTTCC	498 20 64.13 50.00	ATCTTAAGCGTAATCCGGAACATCGTATGGGTAAGCAACTGCCAAAGCACCAA	ATCTTAAGCGTAATCCGGAACATCGTATGGGTA	AGCAACTGCCAAAGCACCAA	354
PGA27	1458	145 27 62.02 33.33	CATATCGACGACGACGACAAGCATATGCTCGAGTATAGCAAAACTTCTAAACCGCAAATC	CATATCGACGACGACGACAAGCATATGCTCGAG	TATAGCAAAACTTCTAAACCGCAAATC	1425 27 62.76 44.44	ATCTTAAGCGTAATCCGGAACATCGTATGGGTAAACACCACTAGACACCAACACTAATCC	ATCTTAAGCGTAATCCGGAACATCGTATGGGTA	AACACCACTAGACACCAACACTAATCC	1281
PGA29	615	118 20 65.62 55.00	CATATCGACGACGACGACAAGCATATGCTCGAGCACGAAGGTGCTGCCATTGA	CATATCGACGACGACGACAAGCATATGCTCGAG	CACGAAGGTGCTGCCATTGA	597 22 62.74 45.45	ATCTTAAGCGTAATCCGGAACATCGTATGGGTAAACAACAGCAGCCATACCAACA	ATCTTAAGCGTAATCCGGAACATCGTATGGGTA	AACAACAGCAGCCATACCAACA	480
PGA3	687	130 26 63.42 42.31	CATATCGACGACGACGACAAGCATATGCTCGAGGGTACTATCAAATTCACACCCGCTAA	CATATCGACGACGACGACAAGCATATGCTCGAG	GGTACTATCAAATTCACACCCGCTAA	684 22 64.98 45.45	ATCTTAAGCGTAATCCGGAACATCGTATGGGTAAATCAAGGCAGCAATGACACCA	ATCTTAAGCGTAATCCGGAACATCGTATGGGTA	AATCAAGGCAGCAATGACACCA	555
PGA30	834	127 20 63.31 55.00	CATATCGACGACGACGACAAGCATATGCTCGAGCGTGAAGGTGCTGGTGTCAA	CATATCGACGACGACGACAAGCATATGCTCGAG	CGTGAAGGTGCTGGTGTCAA	816 20 64.90 55.00	ATCTTAAGCGTAATCCGGAACATCGTATGGGTAAGCAGCAGCAGCAAGAGCAA	ATCTTAAGCGTAATCCGGAACATCGTATGGGTA	AGCAGCAGCAGCAAGAGCAA	690
PGA31	1059	193 26 64.64 46.15	CATATCGACGACGACGACAAGCATATGCTCGAGGCTGCTTCCTTATTGACTTTGTCCTC	CATATCGACGACGACGACAAGCATATGCTCGAG	GCTGCTTCCTTATTGACTTTGTCCTC	1047 18 65.54 61.11	ATCTTAAGCGTAATCCGGAACATCGTATGGGTAACCAATGGCAGCGGCAAC	ATCTTAAGCGTAATCCGGAACATCGTATGGGTA	ACCAATGGCAGCGGCAAC	855
PGA32	1293	115 21 64.60 52.38	CATATCGACGACGACGACAAGCATATGCTCGAGCCTTCAAGATCCCAACCAGCA	CATATCGACGACGACGACAAGCATATGCTCGAG	CCTTCAAGATCCCAACCAGCA	1215 26 62.54 38.46	ATCTTAAGCGTAATCCGGAACATCGTATGGGTATTTATTCCCATCACCACTTAAACTCC	ATCTTAAGCGTAATCCGGAACATCGTATGGGTA	TTTATTCCCATCACCACTTAAACTCC	1101
PGA36	1179	100 26 65.05 42.31	CATATCGACGACGACGACAAGCATATGCTCGAGAAGCAACAATCTTGTGGTGGTACAGA	CATATCGACGACGACGACAAGCATATGCTCGAG	AAGCAACAATCTTGTGGTGGTACAGA	1092 22 63.10 50.00	ATCTTAAGCGTAATCCGGAACATCGTATGGGTAACCAGAACCTGAACCAGATCCA	ATCTTAAGCGTAATCCGGAACATCGTATGGGTA	ACCAGAACCTGAACCAGATCCA	993
PGA38	1305	121 20 63.89 60.00	CATATCGACGACGACGACAAGCATATGCTCGAGCCATCCTCATCGGCCTTACC	CATATCGACGACGACGACAAGCATATGCTCGAG	CCATCCTCATCGGCCTTACC	1266 24 63.61 41.67	ATCTTAAGCGTAATCCGGAACATCGTATGGGTATGGAGAAGATGAAGGATTTGATGG	ATCTTAAGCGTAATCCGGAACATCGTATGGGTA	TGGAGAAGATGAAGGATTTGATGG	1146
PGA39	846	115 22 64.59 54.55	CATATCGACGACGACGACAAGCATATGCTCGAGGGTGCTACCCTTAGTGCCGAAA	CATATCGACGACGACGACAAGCATATGCTCGAG	GGTGCTACCCTTAGTGCCGAAA	834 21 64.77 52.38	ATCTTAAGCGTAATCCGGAACATCGTATGGGTAAGCTCCAACAATGGCAGCAAC	ATCTTAAGCGTAATCCGGAACATCGTATGGGTA	AGCTCCAACAATGGCAGCAAC	720
PGA4	1356	139 20 64.53 60.00	CATATCGACGACGACGACAAGCATATGCTCGAGCCAGGTGGGTCATCCGAGTT	CATATCGACGACGACGACAAGCATATGCTCGAG	CCAGGTGGGTCATCCGAGTT	1245 21 64.14 52.38	ATCTTAAGCGTAATCCGGAACATCGTATGGGTAGCTGGAAACTTGGCTGGTTTG	ATCTTAAGCGTAATCCGGAACATCGTATGGGTA	GCTGGAAACTTGGCTGGTTTG	1107
PGA40 (1)	3345	139 26 63.01 42.31	CATATCGACGACGACGACAAGCATATGCTCGAGTATTTAGATCTGGAAGCAACCTCTGG	CATATCGACGACGACGACAAGCATATGCTCGAG	TATTTAGATCTGGAAGCAACCTCTGG	1704 26 63.46 42.31	ATCTTAAGCGTAATCCGGAACATCGTATGGGTATGATGACTCATTGGTACATTCAGGAC	ATCTTAAGCGTAATCCGGAACATCGTATGGGTA	TGATGACTCATTGGTACATTCAGGAC	1566
PGA40 (2)	3345	1558 26 65.32 46.15	CATATCGACGACGACGACAAGCATATGCTCGAGACAACAACACGGGTTATTCCTACTGC	CATATCGACGACGACGACAAGCATATGCTCGAG	ACAACAACACGGGTTATTCCTACTGC	3168 20 66.14 65.00	ATCTTAAGCGTAATCCGGAACATCGTATGGGTACTGTGGTGGTGGTGCTGGTG	ATCTTAAGCGTAATCCGGAACATCGTATGGGTA	CTGTGGTGGTGGTGCTGGTG	1611
PGA44	924	106 21 64.62 52.38	CATATCGACGACGACGACAAGCATATGCTCGAGGGTTTCGCTTGTGGACTTGGA	CATATCGACGACGACGACAAGCATATGCTCGAG	GGTTTCGCTTGTGGACTTGGA	876 20 63.86 55.00	ATCTTAAGCGTAATCCGGAACATCGTATGGGTATGGATAACCCATGGCACCAC	ATCTTAAGCGTAATCCGGAACATCGTATGGGTA	TGGATAACCCATGGCACCAC	771
PGA45	1389	139 21 63.05 52.38	CATATCGACGACGACGACAAGCATATGCTCGAGGATCCTTCTCAAGCAGCAGCA	CATATCGACGACGACGACAAGCATATGCTCGAG	GATCCTTCTCAAGCAGCAGCA	1350 22 64.35 45.45	ATCTTAAGCGTAATCCGGAACATCGTATGGGTATGCCTTCAAGAATGTGGTTTGG	ATCTTAAGCGTAATCCGGAACATCGTATGGGTA	TGCCTTCAAGAATGTGGTTTGG	1212
PGA46	999	160 26 62.76 38.46	CATATCGACGACGACGACAAGCATATGCTCGAGGAAATACCAATCACTGAGAAGCAACA	CATATCGACGACGACGACAAGCATATGCTCGAG	GAAATACCAATCACTGAGAAGCAACA	924 25 64.41 40.00	ATCTTAAGCGTAATCCGGAACATCGTATGGGTAAGCTGAATTTTCATCTTCTCCACCA	ATCTTAAGCGTAATCCGGAACATCGTATGGGTA	AGCTGAATTTTCATCTTCTCCACCA	765
PGA47	1962	100 22 64.87 50.00	CATATCGACGACGACGACAAGCATATGCTCGAGCCAGGCCAATACAAAGGCAAAG	CATATCGACGACGACGACAAGCATATGCTCGAG	CCAGGCCAATACAAAGGCAAAG	1944 22 64.71 54.55	ATCTTAAGCGTAATCCGGAACATCGTATGGGTATGCAGCCACTGCTAAACCGTAG	ATCTTAAGCGTAATCCGGAACATCGTATGGGTA	TGCAGCCACTGCTAAACCGTAG	1845
PGA49 (1)	2205	157 23 63.91 43.48	CATATCGACGACGACGACAAGCATATGCTCGAGTCTGGAGTTAACGGCACAAACAA	CATATCGACGACGACGACAAGCATATGCTCGAG	TCTGGAGTTAACGGCACAAACAA	1077 22 63.32 45.45	ATCTTAAGCGTAATCCGGAACATCGTATGGGTATGGAAGCCTCATCTTTTCTGGA	ATCTTAAGCGTAATCCGGAACATCGTATGGGTA	TGGAAGCCTCATCTTTTCTGGA	921
PGA49 (2)	2205	1120 21 64.24 47.62	CATATCGACGACGACGACAAGCATATGCTCGAGGACCCATCTGCAACAATGCAA	CATATCGACGACGACGACAAGCATATGCTCGAG	GACCCATCTGCAACAATGCAA	2124 24 63.55 41.67	ATCTTAAGCGTAATCCGGAACATCGTATGGGTAAGCTGATCGGAATACAAATTGTCG	ATCTTAAGCGTAATCCGGAACATCGTATGGGTA	AGCTGATCGGAATACAAATTGTCG	1005
PGA5	1926	112 23 62.77 39.13	CATATCGACGACGACGACAAGCATATGCTCGAGAACAACAACAACAACAACGCTGA	CATATCGACGACGACGACAAGCATATGCTCGAG	AACAACAACAACAACAACGCTGA	1851 23 64.45 43.48	ATCTTAAGCGTAATCCGGAACATCGTATGGGTATATGGCATTACCACCAGCAATCA	ATCTTAAGCGTAATCCGGAACATCGTATGGGTA	TATGGCATTACCACCAGCAATCA	1740
PGA50	930	103 22 65.16 54.55	CATATCGACGACGACGACAAGCATATGCTCGAGACCGGTACATATTCGCCTGTGG	CATATCGACGACGACGACAAGCATATGCTCGAG	ACCGGTACATATTCGCCTGTGG	873 23 63.14 43.48	ATCTTAAGCGTAATCCGGAACATCGTATGGGTAATTGGCAACTCCTGTTGATGAGA	ATCTTAAGCGTAATCCGGAACATCGTATGGGTA	ATTGGCAACTCCTGTTGATGAGA	771
PGA51	1359	184 19 65.56 63.16	CATATCGACGACGACGACAAGCATATGCTCGAGTGGTGGGAAGCTGGTGGTG	CATATCGACGACGACGACAAGCATATGCTCGAG	TGGTGGGAAGCTGGTGGTG	1344 24 63.24 54.17	ATCTTAAGCGTAATCCGGAACATCGTATGGGTACACACAGGACCCTACTAAGGATGC	ATCTTAAGCGTAATCCGGAACATCGTATGGGTA	CACACAGGACCCTACTAAGGATGC	1161
PGA52	1155	190 20 64.87 50.00	CATATCGACGACGACGACAAGCATATGCTCGAGACGAACGCACCATTGAACGA	CATATCGACGACGACGACAAGCATATGCTCGAG	ACGAACGCACCATTGAACGA	1149 23 64.95 47.83	ATCTTAAGCGTAATCCGGAACATCGTATGGGTAAACCCAAAGTGTAAGCACCGTCA	ATCTTAAGCGTAATCCGGAACATCGTATGGGTA	AACCCAAAGTGTAAGCACCGTCA	960
PGA53	420	151 22 63.69 45.45	CATATCGACGACGACGACAAGCATATGCTCGAGGCTGAAATTGCCAAGAAGACCA	CATATCGACGACGACGACAAGCATATGCTCGAG	GCTGAAATTGCCAAGAAGACCA	417 26 64.51 38.46	ATCTTAAGCGTAATCCGGAACATCGTATGGGTACAATAATAAAGCTAAAGCGGCCAAGA	ATCTTAAGCGTAATCCGGAACATCGTATGGGTA	CAATAATAAAGCTAAAGCGGCCAAGA	267
PGA54	1029	100 20 62.02 50.00	CATATCGACGACGACGACAAGCATATGCTCGAGTCCACTTCATTGGCTGATGG	CATATCGACGACGACGACAAGCATATGCTCGAG	TCCACTTCATTGGCTGATGG	1002 20 63.00 50.00	ATCTTAAGCGTAATCCGGAACATCGTATGGGTATGGGGCATAGTCCGAAATTG	ATCTTAAGCGTAATCCGGAACATCGTATGGGTA	TGGGGCATAGTCCGAAATTG	903
PGA55 (2)	4215	2338 21 63.41 52.38	CATATCGACGACGACGACAAGCATATGCTCGAGTCAAGCCAAGCTACCAGCTCA	CATATCGACGACGACGACAAGCATATGCTCGAG	TCAAGCCAAGCTACCAGCTCA	4143 21 63.92 52.38	ATCTTAAGCGTAATCCGGAACATCGTATGGGTATCCCTGTAAAACACCGGCAGT	ATCTTAAGCGTAATCCGGAACATCGTATGGGTA	TCCCTGTAAAACACCGGCAGT	1806
PGA60	2226	334 20 63.49 55.00	CATATCGACGACGACGACAAGCATATGCTCGAGTGTGGTACCAAACCGCCCTA	CATATCGACGACGACGACAAGCATATGCTCGAG	TGTGGTACCAAACCGCCCTA	2178 22 65.01 45.45	ATCTTAAGCGTAATCCGGAACATCGTATGGGTATGAACCAGCCAAATTAGCAGCA	ATCTTAAGCGTAATCCGGAACATCGTATGGGTA	TGAACCAGCCAAATTAGCAGCA	1845
PGA9	951	103 22 64.41 54.55	CATATCGACGACGACGACAAGCATATGCTCGAGGCAGACTTTCCCTTTGGAGGTG	CATATCGACGACGACGACAAGCATATGCTCGAG	GCAGACTTTCCCTTTGGAGGTG	906 20 64.60 55.00	ATCTTAAGCGTAATCCGGAACATCGTATGGGTATACCGAACCGGTGACCATCA	ATCTTAAGCGTAATCCGGAACATCGTATGGGTA	TACCGAACCGGTGACCATCA	804
PGK1	1254	124 20 64.47 50.00	CATATCGACGACGACGACAAGCATATGCTCGAGGCTGCTTTGCCAACCATCAA	CATATCGACGACGACGACAAGCATATGCTCGAG	GCTGCTTTGCCAACCATCAA	1239 24 63.16 50.00	ATCTTAAGCGTAATCCGGAACATCGTATGGGTAAAGAGCAACTACACCTGGCAAGTC	ATCTTAAGCGTAATCCGGAACATCGTATGGGTA	AAGAGCAACTACACCTGGCAAGTC	1116
PHO11	1389	118 20 64.45 60.00	CATATCGACGACGACGACAAGCATATGCTCGAGCTTGGCGGTAGTGCCCCTTA	CATATCGACGACGACGACAAGCATATGCTCGAG	CTTGGCGGTAGTGCCCCTTA	1323 27 65.09 40.74	ATCTTAAGCGTAATCCGGAACATCGTATGGGTATGGATAAGTGCTATTGACACCACATTG	ATCTTAAGCGTAATCCGGAACATCGTATGGGTA	TGGATAAGTGCTATTGACACCACATTG	1206
PHR1	1647	226 20 64.70 55.00	CATATCGACGACGACGACAAGCATATGCTCGAGTTAGCCGATGCTGACGCTTG	CATATCGACGACGACGACAAGCATATGCTCGAG	TTAGCCGATGCTGACGCTTG	1530 20 65.55 60.00	ATCTTAAGCGTAATCCGGAACATCGTATGGGTAGCTGGTGCTGCTGCTTGATG	ATCTTAAGCGTAATCCGGAACATCGTATGGGTA	GCTGGTGCTGCTGCTTGATG	1305
PHR2	1635	112 26 65.24 34.62	CATATCGACGACGACGACAAGCATATGCTCGAGTCCAACAATGGATCCCAATTTTACAT	CATATCGACGACGACGACAAGCATATGCTCGAG	TCCAACAATGGATCCCAATTTTACAT	1530 21 64.26 52.38	ATCTTAAGCGTAATCCGGAACATCGTATGGGTATGAACCAGATGACGAGCTGGA	ATCTTAAGCGTAATCCGGAACATCGTATGGGTA	TGAACCAGATGACGAGCTGGA	1419
PHR3	1516	118 20 63.29 50.00	CATATCGACGACGACGACAAGCATATGCTCGAGAACCGCCAACACATTCTTGC	CATATCGACGACGACGACAAGCATATGCTCGAG	AACCGCCAACACATTCTTGC	1449 20 65.53 65.00	ATCTTAAGCGTAATCCGGAACATCGTATGGGTAGGGGTGCTAGGTGGTGGTGA	ATCTTAAGCGTAATCCGGAACATCGTATGGGTA	GGGGTGCTAGGTGGTGGTGA	1332
PIL1	927	145 20 65.15 60.00	CATATCGACGACGACGACAAGCATATGCTCGAGGCCACTGGCCCAGAATTGTC	CATATCGACGACGACGACAAGCATATGCTCGAG	GCCACTGGCCCAGAATTGTC	924 24 64.02 37.50	ATCTTAAGCGTAATCCGGAACATCGTATGGGTATTGGTGTTCAACATTTTCATCGTG	ATCTTAAGCGTAATCCGGAACATCGTATGGGTA	TTGGTGTTCAACATTTTCATCGTG	780
PIR32 (IPF7274)	1275	286 23 63.56 52.17	CATATCGACGACGACGACAAGCATATGCTCGAGACTGCTACGGCTCCTGGTTCTAA	CATATCGACGACGACGACAAGCATATGCTCGAG	ACTGCTACGGCTCCTGGTTCTAA	1242 24 63.03 37.50	ATCTTAAGCGTAATCCGGAACATCGTATGGGTAAACAGGATGACATTGGAAAGCAAT	ATCTTAAGCGTAATCCGGAACATCGTATGGGTA	AACAGGATGACATTGGAAAGCAAT	957
PLB1	1818	118 22 64.50 50.00	CATATCGACGACGACGACAAGCATATGCTCGAGGGATCTCAGGGGATCAATCCAA	CATATCGACGACGACGACAAGCATATGCTCGAG	GGATCTCAGGGGATCAATCCAA	1794 23 64.04 47.83	ATCTTAAGCGTAATCCGGAACATCGTATGGGTATCCTCCGTCATTAAACCCAGCTA	ATCTTAAGCGTAATCCGGAACATCGTATGGGTA	TCCTCCGTCATTAAACCCAGCTA	1677
PLB3 (1.1)	1899	133 21 62.45 47.62	CATATCGACGACGACGACAAGCATATGCTCGAGGCCGATTCACTTTCACCTCAA	CATATCGACGACGACGACAAGCATATGCTCGAG	GCCGATTCACTTTCACCTCAA	1863 22 63.01 45.45	ATCTTAAGCGTAATCCGGAACATCGTATGGGTACATGGCCCATAATGACCAACTT	ATCTTAAGCGTAATCCGGAACATCGTATGGGTA	CATGGCCCATAATGACCAACTT	1731
PLB3 (1.2)	1899	313 21 65.60 52.38	CATATCGACGACGACGACAAGCATATGCTCGAGGCCATGTTGAATGGAGCTGGA	CATATCGACGACGACGACAAGCATATGCTCGAG	GCCATGTTGAATGGAGCTGGA	1863 22 63.01 45.45	ATCTTAAGCGTAATCCGGAACATCGTATGGGTACATGGCCCATAATGACCAACTT	ATCTTAAGCGTAATCCGGAACATCGTATGGGTA	CATGGCCCATAATGACCAACTT	1551
PLB4	915	100 20 65.72 60.00	CATATCGACGACGACGACAAGCATATGCTCGAGGGCGGGATTGGAGGTGAAGT	CATATCGACGACGACGACAAGCATATGCTCGAG	GGCGGGATTGGAGGTGAAGT	774 24 64.67 37.50	ATCTTAAGCGTAATCCGGAACATCGTATGGGTATCCAAACAATCCACCTTTTGATGA	ATCTTAAGCGTAATCCGGAACATCGTATGGGTA	TCCAAACAATCCACCTTTTGATGA	675
PLB5	2265	181 20 64.51 55.00	CATATCGACGACGACGACAAGCATATGCTCGAGTCATCTGCCCAGGCATCATC	CATATCGACGACGACGACAAGCATATGCTCGAG	TCATCTGCCCAGGCATCATC	1914 21 64.93 52.38	ATCTTAAGCGTAATCCGGAACATCGTATGGGTAACAGCCAACACACGTTGACCA	ATCTTAAGCGTAATCCGGAACATCGTATGGGTA	ACAGCCAACACACGTTGACCA	1734
PMA1 (1)	2688	142 20 65.32 55.00	CATATCGACGACGACGACAAGCATATGCTCGAGTCCTTCAAAGCCGTCCCAGA	CATATCGACGACGACGACAAGCATATGCTCGAG	TCCTTCAAAGCCGTCCCAGA	1296 22 64.29 54.55	ATCTTAAGCGTAATCCGGAACATCGTATGGGTAGGAGACAGGATCGAAAGGTTGG	ATCTTAAGCGTAATCCGGAACATCGTATGGGTA	GGAGACAGGATCGAAAGGTTGG	1155
PMA1 (2)	2688	1351 21 64.27 52.38	CATATCGACGACGACGACAAGCATATGCTCGAGAAGGGTGCCCCATTATTCGTC	CATATCGACGACGACGACAAGCATATGCTCGAG	AAGGGTGCCCCATTATTCGTC	2478 22 64.37 50.00	ATCTTAAGCGTAATCCGGAACATCGTATGGGTACCAGTTTTGAGACCACCAACCA	ATCTTAAGCGTAATCCGGAACATCGTATGGGTA	CCAGTTTTGAGACCACCAACCA	1128
PPS1 (1)	2556	265 26 63.20 34.62	CATATCGACGACGACGACAAGCATATGCTCGAGTCTCGACCAGATGATATTCGATTTTT	CATATCGACGACGACGACAAGCATATGCTCGAG	TCTCGACCAGATGATATTCGATTTTT	1296 22 64.45 40.91	ATCTTAAGCGTAATCCGGAACATCGTATGGGTATGGTGGGAATTCCAAATGATGA	ATCTTAAGCGTAATCCGGAACATCGTATGGGTA	TGGTGGGAATTCCAAATGATGA	1032
PPS1 (2)	2556	1378 23 65.14 43.48	CATATCGACGACGACGACAAGCATATGCTCGAGTCGTCAACCACAACCAAAAATCC	CATATCGACGACGACGACAAGCATATGCTCGAG	TCGTCAACCACAACCAAAAATCC	2325 26 64.59 42.31	ATCTTAAGCGTAATCCGGAACATCGTATGGGTATTCAGCAATTACAACGGTAGCACTTC	ATCTTAAGCGTAATCCGGAACATCGTATGGGTA	TTCAGCAATTACAACGGTAGCACTTC	948
PRA1	900	100 19 64.92 63.16	CATATCGACGACGACGACAAGCATATGCTCGAGCGGGCCGACTGGGTTAAAG	CATATCGACGACGACGACAAGCATATGCTCGAG	CGGGCCGACTGGGTTAAAG	855 21 64.87 57.14	ATCTTAAGCGTAATCCGGAACATCGTATGGGTAAGCATCTGTTGTGGCGCTAGG	ATCTTAAGCGTAATCCGGAACATCGTATGGGTA	AGCATCTGTTGTGGCGCTAGG	756
PRY2	816	121 20 65.25 55.00	CATATCGACGACGACGACAAGCATATGCTCGAGACCGTTGTGGCCACCAAATC	CATATCGACGACGACGACAAGCATATGCTCGAG	ACCGTTGTGGCCACCAAATC	744 24 63.57 45.83	ATCTTAAGCGTAATCCGGAACATCGTATGGGTAACCACGAGGCAAGTATTCACAAAC	ATCTTAAGCGTAATCCGGAACATCGTATGGGTA	ACCACGAGGCAAGTATTCACAAAC	624
RAD50 (1) (IPF11620)	3999	172 20 65.12 55.00	CATATCGACGACGACGACAAGCATATGCTCGAGTGTGGTCAAAACGGGTGTGG	CATATCGACGACGACGACAAGCATATGCTCGAG	TGTGGTCAAAACGGGTGTGG	1971 26 62.00 30.77	ATCTTAAGCGTAATCCGGAACATCGTATGGGTAGTTGCTTTTCAAAGAGTCAATTTTCA	ATCTTAAGCGTAATCCGGAACATCGTATGGGTA	GTTGCTTTTCAAAGAGTCAATTTTCA	1800
RAS1	876	160 26 63.05 38.46	CATATCGACGACGACGACAAGCATATGCTCGAGTTGGATGTTTTAGATACTGCTGGACA	CATATCGACGACGACGACAAGCATATGCTCGAG	TTGGATGTTTTAGATACTGCTGGACA	810 26 63.05 34.62	ATCTTAAGCGTAATCCGGAACATCGTATGGGTATTCAGATTGTTGTTGTGGTTCTTGTT	ATCTTAAGCGTAATCCGGAACATCGTATGGGTA	TTCAGATTGTTGTTGTGGTTCTTGTT	651
RAS2	963	115 26 64.98 38.46	CATATCGACGACGACGACAAGCATATGCTCGAGTTCGACGAAAGTTTGTATGACTTGGA	CATATCGACGACGACGACAAGCATATGCTCGAG	TTCGACGAAAGTTTGTATGACTTGGA	915 20 66.45 60.00	ATCTTAAGCGTAATCCGGAACATCGTATGGGTATGCCAGTGGGCCAGATGACT	ATCTTAAGCGTAATCCGGAACATCGTATGGGTA	TGCCAGTGGGCCAGATGACT	801
RAX2 (2) (IPF15377)	4182	2167 23 64.23 43.48	CATATCGACGACGACGACAAGCATATGCTCGAGTTAGGGCCAAAACAACAAGATGG	CATATCGACGACGACGACAAGCATATGCTCGAG	TTAGGGCCAAAACAACAAGATGG	3867 20 65.60 60.00	ATCTTAAGCGTAATCCGGAACATCGTATGGGTAACCGGAACCGGAACCAGAAC	ATCTTAAGCGTAATCCGGAACATCGTATGGGTA	ACCGGAACCGGAACCAGAAC	1701
RBT1	2253	220 22 64.95 50.00	CATATCGACGACGACGACAAGCATATGCTCGAGAGAACTTTTGGAAGCGCTGGTG	CATATCGACGACGACGACAAGCATATGCTCGAG	AGAACTTTTGGAAGCGCTGGTG	1899 20 65.12 60.00	ATCTTAAGCGTAATCCGGAACATCGTATGGGTAGGAAGATTCGGTGGCTGGTG	ATCTTAAGCGTAATCCGGAACATCGTATGGGTA	GGAAGATTCGGTGGCTGGTG	1680
RBT5	726	109 21 65.54 52.38	CATATCGACGACGACGACAAGCATATGCTCGAGACCGCTTCCATCAACGGTTTC	CATATCGACGACGACGACAAGCATATGCTCGAG	ACCGCTTCCATCAACGGTTTC	714 20 64.67 55.00	ATCTTAAGCGTAATCCGGAACATCGTATGGGTAAGCAACAGCGGCAATGACAC	ATCTTAAGCGTAATCCGGAACATCGTATGGGTA	AGCAACAGCGGCAATGACAC	606
RHR2	765	37 22 64.91 50.00	CATATCGACGACGACGACAAGCATATGCTCGAGCACGCCGCTTTATTTGACTGTG	CATATCGACGACGACGACAAGCATATGCTCGAG	CACGCCGCTTTATTTGACTGTG	753 26 63.17 34.62	ATCTTAAGCGTAATCCGGAACATCGTATGGGTATTGTAAAAATTGCTCATCAGCGTAGA	ATCTTAAGCGTAATCCGGAACATCGTATGGGTA	TTGTAAAAATTGCTCATCAGCGTAGA	717
RSR1	747	133 20 65.24 60.00	CATATCGACGACGACGACAAGCATATGCTCGAGGAAGTGGATGGCAGGGCTTG	CATATCGACGACGACGACAAGCATATGCTCGAG	GAAGTGGATGGCAGGGCTTG	738 20 63.72 55.00	ATCTTAAGCGTAATCCGGAACATCGTATGGGTATGTGCAGCACTTGCTTCCTG	ATCTTAAGCGTAATCCGGAACATCGTATGGGTA	TGTGCAGCACTTGCTTCCTG	606
RTA3 (YOR49)	1395	115 20 65.69 55.00	CATATCGACGACGACGACAAGCATATGCTCGAGTCCGGTGCCGTCCATACATT	CATATCGACGACGACGACAAGCATATGCTCGAG	TCCGGTGCCGTCCATACATT	1350 22 64.16 45.45	ATCTTAAGCGTAATCCGGAACATCGTATGGGTAACCTTGCAACGTCGATTCTTCA	ATCTTAAGCGTAATCCGGAACATCGTATGGGTA	ACCTTGCAACGTCGATTCTTCA	1236
SAM2	1158	145 21 63.25 47.62	CATATCGACGACGACGACAAGCATATGCTCGAGGCTGCCAAAACCGGTATGATT	CATATCGACGACGACGACAAGCATATGCTCGAG	GCTGCCAAAACCGGTATGATT	864 20 65.00 60.00	ATCTTAAGCGTAATCCGGAACATCGTATGGGTAAGCGGCATAAGCAGCAGACC	ATCTTAAGCGTAATCCGGAACATCGTATGGGTA	AGCGGCATAAGCAGCAGACC	720
SAP1	1176	142 24 63.00 45.83	CATATCGACGACGACGACAAGCATATGCTCGAGGTTAAAAGACAAGCCCTCCCAGTT	CATATCGACGACGACGACAAGCATATGCTCGAG	GTTAAAAGACAAGCCCTCCCAGTT	1170 24 64.62 41.67	ATCTTAAGCGTAATCCGGAACATCGTATGGGTAAAGAGCAGCAATGTTTGAAGCAGA	ATCTTAAGCGTAATCCGGAACATCGTATGGGTA	AAGAGCAGCAATGTTTGAAGCAGA	1029
SAP10	1362	118 22 65.58 50.00	CATATCGACGACGACGACAAGCATATGCTCGAGGCCTTGCCAATGCCTCTTATCA	CATATCGACGACGACGACAAGCATATGCTCGAG	GCCTTGCCAATGCCTCTTATCA	1122 20 64.72 55.00	ATCTTAAGCGTAATCCGGAACATCGTATGGGTACACTGGTGCAACCGAAATGG	ATCTTAAGCGTAATCCGGAACATCGTATGGGTA	CACTGGTGCAACCGAAATGG	1005
SAP2	1197	169 25 64.74 48.00	CATATCGACGACGACGACAAGCATATGCTCGAGCAAGCTGTCCCAGTGACTTTACACA	CATATCGACGACGACGACAAGCATATGCTCGAG	CAAGCTGTCCCAGTGACTTTACACA	1194 24 64.43 50.00	ATCTTAAGCGTAATCCGGAACATCGTATGGGTAGGTCAAGGCAGAAATACTGGAAGC	ATCTTAAGCGTAATCCGGAACATCGTATGGGTA	GGTCAAGGCAGAAATACTGGAAGC	1026
SAP3	1197	154 23 64.20 47.83	CATATCGACGACGACGACAAGCATATGCTCGAGACCAACGTCAACGTCAAGAGACA	CATATCGACGACGACGACAAGCATATGCTCGAG	ACCAACGTCAACGTCAAGAGACA	1110 26 63.69 38.46	ATCTTAAGCGTAATCCGGAACATCGTATGGGTAGGCTGATCTCAAGAAATTATCACCAA	ATCTTAAGCGTAATCCGGAACATCGTATGGGTA	GGCTGATCTCAAGAAATTATCACCAA	957
SAP30 (IPF1183)	1308	118 26 64.43 46.15	CATATCGACGACGACGACAAGCATATGCTCGAGAACCTTGCTTTAGGTACACCTCCTCA	CATATCGACGACGACGACAAGCATATGCTCGAG	AACCTTGCTTTAGGTACACCTCCTCA	1203 25 65.05 44.00	ATCTTAAGCGTAATCCGGAACATCGTATGGGTATGTTGATTGTACTTCTGTGGGAGCA	ATCTTAAGCGTAATCCGGAACATCGTATGGGTA	TGTTGATTGTACTTCTGTGGGAGCA	1086
SAP4	1254	211 22 65.21 54.55	CATATCGACGACGACGACAAGCATATGCTCGAGGATGTGGGCAAAAGAGGACCTG	CATATCGACGACGACGACAAGCATATGCTCGAG	GATGTGGGCAAAAGAGGACCTG	1212 25 63.32 40.00	ATCTTAAGCGTAATCCGGAACATCGTATGGGTATTGAGCCATGGAGATCTTTCTATCA	ATCTTAAGCGTAATCCGGAACATCGTATGGGTA	TTGAGCCATGGAGATCTTTCTATCA	1002
SAP5	1257	175 21 64.61 52.38	CATATCGACGACGACGACAAGCATATGCTCGAGCCCTCAGAATTTCCCGTCGAT	CATATCGACGACGACGACAAGCATATGCTCGAG	CCCTCAGAATTTCCCGTCGAT	1248 24 63.58 45.83	ATCTTAAGCGTAATCCGGAACATCGTATGGGTAAGCAACAATGTCAGACTCGGAAGT	ATCTTAAGCGTAATCCGGAACATCGTATGGGTA	AGCAACAATGTCAGACTCGGAAGT	1074
SAP6	1257	175 21 65.13 47.62	CATATCGACGACGACGACAAGCATATGCTCGAGCCCACAAAAATTCCCGTCGAT	CATATCGACGACGACGACAAGCATATGCTCGAG	CCCACAAAAATTCCCGTCGAT	1215 26 65.08 38.46	ATCTTAAGCGTAATCCGGAACATCGTATGGGTATTGAGCCATGGAGATTTTCTTATCGT	ATCTTAAGCGTAATCCGGAACATCGTATGGGTA	TTGAGCCATGGAGATTTTCTTATCGT	1041
SAP7	1767	211 21 65.41 52.38	CATATCGACGACGACGACAAGCATATGCTCGAGGGGATCTTTTCCGGTGGTTCA	CATATCGACGACGACGACAAGCATATGCTCGAG	GGGATCTTTTCCGGTGGTTCA	1764 22 65.93 54.55	ATCTTAAGCGTAATCCGGAACATCGTATGGGTACTCGATAGGAACAACGGCATGG	ATCTTAAGCGTAATCCGGAACATCGTATGGGTA	CTCGATAGGAACAACGGCATGG	1554
SAP8	1218	175 20 65.74 55.00	CATATCGACGACGACGACAAGCATATGCTCGAGCAATCCCAACAGCAGCAGCA	CATATCGACGACGACGACAAGCATATGCTCGAG	CAATCCCAACAGCAGCAGCA	1116 22 65.78 50.00	ATCTTAAGCGTAATCCGGAACATCGTATGGGTAATCCCCCAAAATAGTGGCCAGA	ATCTTAAGCGTAATCCGGAACATCGTATGGGTA	ATCCCCCAAAATAGTGGCCAGA	942
SAP9	1635	196 21 64.58 42.86	CATATCGACGACGACGACAAGCATATGCTCGAGATGGCCACGTTGAAAATTGGA	CATATCGACGACGACGACAAGCATATGCTCGAG	ATGGCCACGTTGAAAATTGGA	1608 23 64.91 43.48	ATCTTAAGCGTAATCCGGAACATCGTATGGGTAAAGCGAAAGCAACAACCCATACA	ATCTTAAGCGTAATCCGGAACATCGTATGGGTA	AAGCGAAAGCAACAACCCATACA	1413
SAP99	1092	136 25 64.89 48.00	CATATCGACGACGACGACAAGCATATGCTCGAGACTGGATCCTCAGAATTGACACAGG	CATATCGACGACGACGACAAGCATATGCTCGAG	ACTGGATCCTCAGAATTGACACAGG	1026 20 65.42 50.00	ATCTTAAGCGTAATCCGGAACATCGTATGGGTACAAATCGACGGCAAGCAACA	ATCTTAAGCGTAATCCGGAACATCGTATGGGTA	CAAATCGACGGCAAGCAACA	891
SAP99 (IPF11977)	1005	181 23 63.25 43.48	CATATCGACGACGACGACAAGCATATGCTCGAGTGTTCAGGGTGCAAAAATACTGG	CATATCGACGACGACGACAAGCATATGCTCGAG	TGTTCAGGGTGCAAAAATACTGG	996 22 65.04 45.45	ATCTTAAGCGTAATCCGGAACATCGTATGGGTATTTGATGTTGGTTTCGGTGGTG	ATCTTAAGCGTAATCCGGAACATCGTATGGGTA	TTTGATGTTGGTTTCGGTGGTG	816
SCW11	975	112 21 64.13 52.38	CATATCGACGACGACGACAAGCATATGCTCGAGTCCAGCACATCCTCAACCTCA	CATATCGACGACGACGACAAGCATATGCTCGAG	TCCAGCACATCCTCAACCTCA	936 23 64.54 52.17	ATCTTAAGCGTAATCCGGAACATCGTATGGGTAACCGTATGGACCTGGATCTTTCC	ATCTTAAGCGTAATCCGGAACATCGTATGGGTA	ACCGTATGGACCTGGATCTTTCC	825
SCW4	1737	172 20 65.60 55.00	CATATCGACGACGACGACAAGCATATGCTCGAGGCCCAACAAGCTGCCAATGT	CATATCGACGACGACGACAAGCATATGCTCGAG	GCCCAACAAGCTGCCAATGT	1728 24 65.70 45.83	ATCTTAAGCGTAATCCGGAACATCGTATGGGTATGGATCACCGTATAATCCCCAATG	ATCTTAAGCGTAATCCGGAACATCGTATGGGTA	TGGATCACCGTATAATCCCCAATG	1557
SDH2	792	139 25 64.74 40.00	CATATCGACGACGACGACAAGCATATGCTCGAGCCAAAAATGCAAACCTATGAAGTCG	CATATCGACGACGACGACAAGCATATGCTCGAG	CCAAAAATGCAAACCTATGAAGTCG	741 23 64.82 47.83	ATCTTAAGCGTAATCCGGAACATCGTATGGGTACAATCCCTTTGGACATGTTCTGG	ATCTTAAGCGTAATCCGGAACATCGTATGGGTA	CAATCCCTTTGGACATGTTCTGG	603
SGA1 (IPF8402)	1695	103 22 64.60 45.45	CATATCGACGACGACGACAAGCATATGCTCGAGCAGCAACAGCAACAGCAATCAA	CATATCGACGACGACGACAAGCATATGCTCGAG	CAGCAACAGCAACAGCAATCAA	1626 20 65.03 45.00	ATCTTAAGCGTAATCCGGAACATCGTATGGGTATTTTTCTGCGCCTTGCATGA	ATCTTAAGCGTAATCCGGAACATCGTATGGGTA	TTTTTCTGCGCCTTGCATGA	1524
SIT1	1815	118 21 64.66 42.86	CATATCGACGACGACGACAAGCATATGCTCGAGTCCATTGGGGTTGAAAAAGCA	CATATCGACGACGACGACAAGCATATGCTCGAG	TCCATTGGGGTTGAAAAAGCA	1782 22 64.18 50.00	ATCTTAAGCGTAATCCGGAACATCGTATGGGTAGAAGAAATTGGCCAACGAGTCC	ATCTTAAGCGTAATCCGGAACATCGTATGGGTA	GAAGAAATTGGCCAACGAGTCC	1665
SLK19	3594	295 22 64.84 50.00	CATATCGACGACGACGACAAGCATATGCTCGAGACTGAAGCCAAGGATGCCAAAG	CATATCGACGACGACGACAAGCATATGCTCGAG	ACTGAAGCCAAGGATGCCAAAG	1752 20 64.24 50.00	ATCTTAAGCGTAATCCGGAACATCGTATGGGTATTCTGCCAATTCCCGCTTCT	ATCTTAAGCGTAATCCGGAACATCGTATGGGTA	TTCTGCCAATTCCCGCTTCT	1458
SLN1 (1)	4122	277 22 63.70 45.45	CATATCGACGACGACGACAAGCATATGCTCGAGGCAGTTTTCCTGGAAGCACAAA	CATATCGACGACGACGACAAGCATATGCTCGAG	GCAGTTTTCCTGGAAGCACAAA	1938 22 62.19 50.00	ATCTTAAGCGTAATCCGGAACATCGTATGGGTACGATACTGATCCATCCACAGGA	ATCTTAAGCGTAATCCGGAACATCGTATGGGTA	CGATACTGATCCATCCACAGGA	1662
SLN1 (2)	4122	2044 21 65.51 57.14	CATATCGACGACGACGACAAGCATATGCTCGAGCCACCTCCAACACCTCCATCA	CATATCGACGACGACGACAAGCATATGCTCGAG	CCACCTCCAACACCTCCATCA	3918 23 62.92 39.13	ATCTTAAGCGTAATCCGGAACATCGTATGGGTAAACTTCAGGCATTTGAACATCCA	ATCTTAAGCGTAATCCGGAACATCGTATGGGTA	AACTTCAGGCATTTGAACATCCA	1875
SLN1 (2)	4122	2044 21 65.51 57.14	CATATCGACGACGACGACAAGCATATGCTCGAGCCACCTCCAACACCTCCATCA	CATATCGACGACGACGACAAGCATATGCTCGAG	CCACCTCCAACACCTCCATCA	3918 23 62.92 39.13	ATCTTAAGCGTAATCCGGAACATCGTATGGGTAAACTTCAGGCATTTGAACATCCA	ATCTTAAGCGTAATCCGGAACATCGTATGGGTA	AACTTCAGGCATTTGAACATCCA	1875
SMF12	1755	217 23 63.30 43.48	CATATCGACGACGACGACAAGCATATGCTCGAGGGATCATTTGTTGGTCCAGGAAT	CATATCGACGACGACGACAAGCATATGCTCGAG	GGATCATTTGTTGGTCCAGGAAT	1746 22 64.22 45.45	ATCTTAAGCGTAATCCGGAACATCGTATGGGTATACACCGTTCTTTGCCATTTCG	ATCTTAAGCGTAATCCGGAACATCGTATGGGTA	TACACCGTTCTTTGCCATTTCG	1530
SNF3	2247	487 20 65.78 55.00	CATATCGACGACGACGACAAGCATATGCTCGAGTCGCCAAAATGGCTGAGAGG	CATATCGACGACGACGACAAGCATATGCTCGAG	TCGCCAAAATGGCTGAGAGG	2214 20 63.22 55.00	ATCTTAAGCGTAATCCGGAACATCGTATGGGTACCCTTCTTGTTCCACCACCA	ATCTTAAGCGTAATCCGGAACATCGTATGGGTA	CCCTTCTTGTTCCACCACCA	1728
SNQ2 (1)	4488	193 23 63.42 43.48	CATATCGACGACGACGACAAGCATATGCTCGAGTCGAGAGAAATTTCCCGTCAAGT	CATATCGACGACGACGACAAGCATATGCTCGAG	TCGAGAGAAATTTCCCGTCAAGT	1599 21 63.55 47.62	ATCTTAAGCGTAATCCGGAACATCGTATGGGTATCGAGAAAATGCCCCAGAAAC	ATCTTAAGCGTAATCCGGAACATCGTATGGGTA	TCGAGAAAATGCCCCAGAAAC	1407
SNQ2 (2)	4488	1717 22 65.62 50.00	CATATCGACGACGACGACAAGCATATGCTCGAGCCATCAGCAGATTCCCTTTCCA	CATATCGACGACGACGACAAGCATATGCTCGAG	CCATCAGCAGATTCCCTTTCCA	2940 20 64.87 50.00	ATCTTAAGCGTAATCCGGAACATCGTATGGGTATCCAACAACGGCATCAGCAT	ATCTTAAGCGTAATCCGGAACATCGTATGGGTA	TCCAACAACGGCATCAGCAT	1224
SNQ2 (3)	4488	2980 21 65.15 47.62	CATATCGACGACGACGACAAGCATATGCTCGAGTTGTCGATCGGGGTTGAATTG	CATATCGACGACGACGACAAGCATATGCTCGAG	TTGTCGATCGGGGTTGAATTG	4080 21 64.09 47.62	ATCTTAAGCGTAATCCGGAACATCGTATGGGTATGTCCAAAATCCCGGCATAAG	ATCTTAAGCGTAATCCGGAACATCGTATGGGTA	TGTCCAAAATCCCGGCATAAG	1101
SPR1	1578	151 24 63.37 37.50	CATATCGACGACGACGACAAGCATATGCTCGAGTATCAAACAACAATGCCATCGGTA	CATATCGACGACGACGACAAGCATATGCTCGAG	TATCAAACAACAATGCCATCGGTA	1545 22 63.27 50.00	ATCTTAAGCGTAATCCGGAACATCGTATGGGTACCACAACCAACTCTCACCAACA	ATCTTAAGCGTAATCCGGAACATCGTATGGGTA	CCACAACCAACTCTCACCAACA	1395
SRB1	1089	154 20 63.52 60.00	CATATCGACGACGACGACAAGCATATGCTCGAGGCCGTCAACTACCGTCCAGA	CATATCGACGACGACGACAAGCATATGCTCGAG	GCCGTCAACTACCGTCCAGA	999 20 65.13 55.00	ATCTTAAGCGTAATCCGGAACATCGTATGGGTATTCGACGTCGTCACCCAAGA	ATCTTAAGCGTAATCCGGAACATCGTATGGGTA	TTCGACGTCGTCACCCAAGA	846
SSA2	1938	109 21 64.02 52.38	CATATCGACGACGACGACAAGCATATGCTCGAGCCATCTTTCGTTGCCTTCACC	CATATCGACGACGACGACAAGCATATGCTCGAG	CCATCTTTCGTTGCCTTCACC	1890 20 64.55 60.00	ATCTTAAGCGTAATCCGGAACATCGTATGGGTAAGCACCACCTGGGAAACCAC	ATCTTAAGCGTAATCCGGAACATCGTATGGGTA	AGCACCACCTGGGAAACCAC	1782
SSB1	1842	181 22 63.70 45.45	CATATCGACGACGACGACAAGCATATGCTCGAGGCTGCTTTGAACCCAAAGAACA	CATATCGACGACGACGACAAGCATATGCTCGAG	GCTGCTTTGAACCCAAAGAACA	1839 22 64.28 54.55	ATCTTAAGCGTAATCCGGAACATCGTATGGGTAACGGGTAGCCATACCTTTGGTG	ATCTTAAGCGTAATCCGGAACATCGTATGGGTA	ACGGGTAGCCATACCTTTGGTG	1659
SSU1	1446	343 22 64.47 45.45	CATATCGACGACGACGACAAGCATATGCTCGAGATGGGAACCGGAATATCATCCA	CATATCGACGACGACGACAAGCATATGCTCGAG	ATGGGAACCGGAATATCATCCA	1377 23 63.72 52.17	ATCTTAAGCGTAATCCGGAACATCGTATGGGTACACCACGACACCAATAGAACACC	ATCTTAAGCGTAATCCGGAACATCGTATGGGTA	CACCACGACACCAATAGAACACC	1035
SSY1 (1)	2409	196 22 63.68 50.00	CATATCGACGACGACGACAAGCATATGCTCGAGCGTCAACTTCCCTCTTCCACAA	CATATCGACGACGACGACAAGCATATGCTCGAG	CGTCAACTTCCCTCTTCCACAA	1197 23 65.03 47.83	ATCTTAAGCGTAATCCGGAACATCGTATGGGTATGCCACCCCTGTAGAAAAACTCA	ATCTTAAGCGTAATCCGGAACATCGTATGGGTA	TGCCACCCCTGTAGAAAAACTCA	1002
SSY1 (2)	2409	1267 21 64.50 52.38	CATATCGACGACGACGACAAGCATATGCTCGAGTCCACTGCTGGATTTGTCACG	CATATCGACGACGACGACAAGCATATGCTCGAG	TCCACTGCTGGATTTGTCACG	2172 23 65.69 43.48	ATCTTAAGCGTAATCCGGAACATCGTATGGGTACGATTCATTAACGCAAGCGAATG	ATCTTAAGCGTAATCCGGAACATCGTATGGGTA	CGATTCATTAACGCAAGCGAATG	906
STE2	1413	625 23 63.95 39.13	CATATCGACGACGACGACAAGCATATGCTCGAGAAAATTTGGGGGATAATGGCATC	CATATCGACGACGACGACAAGCATATGCTCGAG	AAAATTTGGGGGATAATGGCATC	1242 20 65.19 60.00	ATCTTAAGCGTAATCCGGAACATCGTATGGGTAATTCCCACCACCACCACCAC	ATCTTAAGCGTAATCCGGAACATCGTATGGGTA	ATTCCCACCACCACCACCAC	618
STE4	1374	151 21 64.16 52.38	CATATCGACGACGACGACAAGCATATGCTCGAGAGAAGGACCCAAGATGCCACA	CATATCGACGACGACGACAAGCATATGCTCGAG	AGAAGGACCCAAGATGCCACA	1350 21 64.54 52.38	ATCTTAAGCGTAATCCGGAACATCGTATGGGTAAGCATCCCATGAACCAGTTGC	ATCTTAAGCGTAATCCGGAACATCGTATGGGTA	AGCATCCCATGAACCAGTTGC	1200
SUL2 (1)	2481	148 25 65.28 40.00	CATATCGACGACGACGACAAGCATATGCTCGAGAGCAATGTTTTTGTTCCAGCATACG	CATATCGACGACGACGACAAGCATATGCTCGAG	AGCAATGTTTTTGTTCCAGCATACG	1263 23 64.30 52.17	ATCTTAAGCGTAATCCGGAACATCGTATGGGTAACCAGTAGCTGGGTAAGCGTTGA	ATCTTAAGCGTAATCCGGAACATCGTATGGGTA	ACCAGTAGCTGGGTAAGCGTTGA	1116
SUL2 (2)	2481	1309 23 64.68 47.83	CATATCGACGACGACGACAAGCATATGCTCGAGCCATTGGCAGGTATTTTCACTGG	CATATCGACGACGACGACAAGCATATGCTCGAG	CCATTGGCAGGTATTTTCACTGG	2418 23 66.43 47.83	ATCTTAAGCGTAATCCGGAACATCGTATGGGTACGGTTCATCAACGTGATCTTCCA	ATCTTAAGCGTAATCCGGAACATCGTATGGGTA	CGGTTCATCAACGTGATCTTCCA	1110
SUN41	1257	172 23 63.32 47.83	CATATCGACGACGACGACAAGCATATGCTCGAGACTGTTGATGGGAACGGTAATCC	CATATCGACGACGACGACAAGCATATGCTCGAG	ACTGTTGATGGGAACGGTAATCC	1218 22 64.63 50.00	ATCTTAAGCGTAATCCGGAACATCGTATGGGTAACCAACGGTACAACCGTCATCA	ATCTTAAGCGTAATCCGGAACATCGTATGGGTA	ACCAACGGTACAACCGTCATCA	1047
SUN42	1119	124 20 64.50 55.00	CATATCGACGACGACGACAAGCATATGCTCGAGGGCAACGGTGACGAAGTTCA	CATATCGACGACGACGACAAGCATATGCTCGAG	GGCAACGGTGACGAAGTTCA	906 21 64.39 57.14	ATCTTAAGCGTAATCCGGAACATCGTATGGGTATGGAGCCCAGTTACCAACACC	ATCTTAAGCGTAATCCGGAACATCGTATGGGTA	TGGAGCCCAGTTACCAACACC	783
SYG1 (1)	2964	184 25 64.85 48.00	CATATCGACGACGACGACAAGCATATGCTCGAGTTGATTGTCCCTACAGAACCTCAGC	CATATCGACGACGACGACAAGCATATGCTCGAG	TTGATTGTCCCTACAGAACCTCAGC	1302 21 65.71 52.38	ATCTTAAGCGTAATCCGGAACATCGTATGGGTATGGCGGTCTCATTTCTGATGC	ATCTTAAGCGTAATCCGGAACATCGTATGGGTA	TGGCGGTCTCATTTCTGATGC	1119
SYG1 (2)	2964	1348 22 63.46 45.45	CATATCGACGACGACGACAAGCATATGCTCGAGGGATTGCCGTTATTTGTGTTGG	CATATCGACGACGACGACAAGCATATGCTCGAG	GGATTGCCGTTATTTGTGTTGG	2922 20 63.63 60.00	ATCTTAAGCGTAATCCGGAACATCGTATGGGTATCCTCCAGTGGTTGCTGTCC	ATCTTAAGCGTAATCCGGAACATCGTATGGGTA	TCCTCCAGTGGTTGCTGTCC	1575
TDH3	1008	178 22 63.96 54.55	CATATCGACGACGACGACAAGCATATGCTCGAGACTGCTTCTGGTGACGACTTGG	CATATCGACGACGACGACAAGCATATGCTCGAG	ACTGCTTCTGGTGACGACTTGG	1008 24 65.01 45.83	ATCTTAAGCGTAATCCGGAACATCGTATGGGTATCAAGCAGAAGCTTTAGCAACGTG	ATCTTAAGCGTAATCCGGAACATCGTATGGGTA	TCAAGCAGAAGCTTTAGCAACGTG	831
TEF1	1377	40 21 64.25 52.38	CATATCGACGACGACGACAAGCATATGCTCGAGGGTCACGTCGATTCCGGTAAA	CATATCGACGACGACGACAAGCATATGCTCGAG	GGTCACGTCGATTCCGGTAAA	1368 22 65.27 50.00	ATCTTAAGCGTAATCCGGAACATCGTATGGGTAAGCAGCTTTTTGAGCAGCCTTG	ATCTTAAGCGTAATCCGGAACATCGTATGGGTA	AGCAGCTTTTTGAGCAGCCTTG	1329
TKL1	2034	187 20 65.53 55.00	CATATCGACGACGACGACAAGCATATGCTCGAGTCCAATGGTCACGCTTGTGC	CATATCGACGACGACGACAAGCATATGCTCGAG	TCCAATGGTCACGCTTGTGC	1968 22 65.23 45.45	ATCTTAAGCGTAATCCGGAACATCGTATGGGTATCTTTCGGCAATTCCTTCTGGA	ATCTTAAGCGTAATCCGGAACATCGTATGGGTA	TCTTTCGGCAATTCCTTCTGGA	1782
TOS1	1407	115 26 63.64 42.31	CATATCGACGACGACGACAAGCATATGCTCGAGATCTACAAAGGTATCGGGTTTTCTGG	CATATCGACGACGACGACAAGCATATGCTCGAG	ATCTACAAAGGTATCGGGTTTTCTGG	1392 23 64.95 47.83	ATCTTAAGCGTAATCCGGAACATCGTATGGGTAGGCAACAGAACCAGCTTCTTTCA	ATCTTAAGCGTAATCCGGAACATCGTATGGGTA	GGCAACAGAACCAGCTTCTTTCA	1278
UTR2	1413	100 26 64.89 42.31	CATATCGACGACGACGACAAGCATATGCTCGAGCATTGTCCTGAAGATAAACCATGCTG	CATATCGACGACGACGACAAGCATATGCTCGAG	CATTGTCCTGAAGATAAACCATGCTG	1392 21 63.89 42.86	ATCTTAAGCGTAATCCGGAACATCGTATGGGTAACCCAAGCAAATGGAAGCAAA	ATCTTAAGCGTAATCCGGAACATCGTATGGGTA	ACCCAAGCAAATGGAAGCAAA	1293
WSC4	1335	112 25 63.24 36.00	CATATCGACGACGACGACAAGCATATGCTCGAGATGTCGAATTGTGAAATTGGATGTC	CATATCGACGACGACGACAAGCATATGCTCGAG	ATGTCGAATTGTGAAATTGGATGTC	1212 23 64.73 52.17	ATCTTAAGCGTAATCCGGAACATCGTATGGGTATGGGAACATAGCTCCTCCATCTG	ATCTTAAGCGTAATCCGGAACATCGTATGGGTA	TGGGAACATAGCTCCTCCATCTG	1101
XOG1 (EXG1)	1317	106 20 63.36 55.00	CATATCGACGACGACGACAAGCATATGCTCGAGTTCAAGAGAGGAGGCGGACA	CATATCGACGACGACGACAAGCATATGCTCGAG	TTCAAGAGAGGAGGCGGACA	1308 21 64.46 47.62	ATCTTAAGCGTAATCCGGAACATCGTATGGGTAGCCACATTGGTTTGGGAATTG	ATCTTAAGCGTAATCCGGAACATCGTATGGGTA	GCCACATTGGTTTGGGAATTG	1203
YHV1	1845	106 20 64.11 50.00	CATATCGACGACGACGACAAGCATATGCTCGAGAATGCCATCCGATCACAACG	CATATCGACGACGACGACAAGCATATGCTCGAG	AATGCCATCCGATCACAACG	1722 20 62.68 45.00	ATCTTAAGCGTAATCCGGAACATCGTATGGGTACAAAACCACCATTGCCACAA	ATCTTAAGCGTAATCCGGAACATCGTATGGGTA	CAAAACCACCATTGCCACAA	1617
YOR049C	1371	112 23 64.03 43.48	CATATCGACGACGACGACAAGCATATGCTCGAGGCCATCGACACATTAACATCCAA	CATATCGACGACGACGACAAGCATATGCTCGAG	GCCATCGACACATTAACATCCAA	1152 20 63.12 50.00	ATCTTAAGCGTAATCCGGAACATCGTATGGGTATTGGGCCAATTCAACCACTC	ATCTTAAGCGTAATCCGGAACATCGTATGGGTA	TTGGGCCAATTCAACCACTC	1041
YPS7 (IPF6613)	2106	148 23 63.44 52.17	CATATCGACGACGACGACAAGCATATGCTCGAGACTACCACCACCACAGGAAAACC	CATATCGACGACGACGACAAGCATATGCTCGAG	ACTACCACCACCACAGGAAAACC	2010 23 62.02 34.78	ATCTTAAGCGTAATCCGGAACATCGTATGGGTAACCATTCAAATTTGCTTGTGCTT	ATCTTAAGCGTAATCCGGAACATCGTATGGGTA	ACCATTCAAATTTGCTTGTGCTT	1863
