# Supplementary material for: Serological Profiling of a Candida albicans Protein Microarray Reveals Permanent Host-Pathogen Interplay and Stage-Specific Responses during Candidemia
Source: PLoS Pathog. 2010 Mar 26;6(3):e1000827. doi: 10.1371/journal.ppat.1000827 (PMC2845659; doi:10.1371/journal.ppat.1000827)
Supplement: Table S4 — Statistical data of convalescent candidemia patients (0.28 MB XLS) [file ppat.1000827.s008.xls]

## Sheet: Convalescent Candidiasis
Gene	Mean1 (Controls)	Mean2 (Ca Patients)	Mean2-Mean1	SD1	SD2	bayesSD1	bayesSD2	MSE.B	MSE.W	Fstat	dfBetBayes	dfWithBayes	p.value	Bonferroni	BH	Reps_Cond_1	Reps_Cond_2	StdErr_Cond_1	StdErr_Cond_2	AUC	AUC_Pval	Bonferroni_AUC	BH_AUC
19.1002	5.11829	5.39296	0.274672	0.510979	0.512298	0.52126	0.529827	0.810778	0.273192	2.9678	1	91	0.0883341	1	0.2288	62	13	0.0662001	0.146948	0.666253	0.0616897	1	0.175095
19.111	6.05503	6.20375	0.148719	0.683538	0.447295	0.676575	0.509453	0.237689	0.425171	0.559	1	91	0.456591	1	0.645099	62	13	0.0859251	0.141297	0.579404	0.374126	1	0.568384
19.1193	7.55696	6.81153	-0.745434	1.21219	1.07949	1.16727	0.906339	5.97162	1.27358	4.6888	1	91	0.0329755	1	0.11409	62	13	0.148244	0.251373	0.674938	0.0492416	1	0.144972
19.1376	6.89527	6.7519	-0.143372	0.704003	0.252402	0.688217	0.388966	0.220903	0.420654	0.5251	1	91	0.470533	1	0.657914	62	13	0.0874037	0.10788	0.57196	0.420939	1	0.608308
19.1442	4.86031	5.12246	0.262149	0.455855	0.465427	0.47259	0.480559	0.738531	0.22459	3.2883	1	91	0.0730717	1	0.206167	62	13	0.0600191	0.133283	0.671216	0.0542913	1	0.157878
19.1582	5.85058	6.2103	0.359711	0.668705	0.76027	0.660409	0.706982	1.39053	0.446609	3.1135	1	91	0.0810014	1	0.216853	62	13	0.0838721	0.196082	0.638958	0.118619	1	0.272938
19.1585	6.10056	6.35495	0.25439	0.710639	0.708825	0.697402	0.694826	0.695462	0.48578	1.4316	1	91	0.234612	1	0.422836	62	13	0.0885701	0.19271	0.591811	0.303604	1	0.491155
19.1607	6.08252	6.28709	0.20457	0.828508	0.760453	0.806328	0.68294	0.449735	0.619957	0.7254	1	91	0.396614	1	0.59118	62	13	0.102404	0.189413	0.576923	0.38936	1	0.58404
19.1738	7.08547	7.22206	0.136592	0.722334	0.876996	0.717366	0.780521	0.200504	0.530164	0.3782	1	91	0.540103	1	0.718735	62	13	0.0911055	0.216478	0.501241	0.994416	1	1
19.1943	6.09304	5.87813	-0.214904	0.478647	0.399308	0.50441	0.471295	0.49632	0.249118	1.9923	1	91	0.161511	1	0.338744	62	13	0.0640601	0.130714	0.662531	0.0677705	1	0.186763
19.1978	5.95656	5.83805	-0.11851	0.473918	0.497337	0.503055	0.568401	0.150934	0.264574	0.5705	1	91	0.452011	1	0.642094	62	13	0.0638881	0.157646	0.579404	0.374126	1	0.568384
19.1979	6.09215	5.84839	-0.243763	0.81362	1.07518	0.793162	0.920436	0.638569	0.664958	0.9603	1	91	0.329709	1	0.532907	62	13	0.100732	0.255283	0.574442	0.404966	1	0.596129
19.198	6.17534	6.62861	0.453274	0.55563	1.53344	0.559055	1.23837	2.20798	0.513259	4.3019	1	91	0.0408948	1	0.132768	62	13	0.0710001	0.343463	0.51861	0.839176	1	0.897899
19.2003	7.72111	7.91086	0.189744	0.25554	0.232427	0.331169	0.518687	0.386908	0.135869	2.8476	1	91	0.0949354	1	0.240638	62	13	0.0420585	0.143858	0.702233	0.0229411	1	0.0836466
19.2072	6.5394	6.51593	-0.0234639	0.514125	0.510371	0.536797	0.603346	0.00591664	0.300624	0.0197	1	91	0.888688	1	0.942368	62	13	0.0681733	0.167338	0.5	1	1	1
19.2175	6.31761	6.55683	0.239216	0.477428	0.33501	0.493422	0.41723	0.61497	0.23206	2.65	1	91	0.107007	1	0.261451	62	13	0.0626647	0.115719	0.663772	0.065691	1	0.184246
19.2222	6.67016	7.07962	0.409459	0.484222	0.273389	0.493237	0.491514	1.80175	0.243004	7.4145	1	91	0.00775539	1	0.039107	62	13	0.0626412	0.136321	0.795285	0.000886902	0.420391	0.00656862
19.2312	6.65436	6.28135	-0.373009	0.565589	0.420794	0.565561	0.477845	1.49525	0.304814	4.9054	1	91	0.0292695	1	0.107549	62	13	0.0718263	0.13253	0.727047	0.0106388	1	0.0475737
19.2337	6.72699	6.23082	-0.496168	0.611826	0.443942	0.625011	0.496064	2.64565	0.366876	7.2113	1	91	0.00860975	1	0.0416431	62	13	0.0793765	0.137583	0.764268	0.0029372	1	0.0178492
19.2397	5.83655	6.0378	0.201256	0.442231	0.548072	0.463036	0.542298	0.435281	0.227501	1.9133	1	91	0.169981	1	0.349633	62	13	0.0588056	0.150406	0.66005	0.0720919	1	0.196388
19.24	6.87698	7.20595	0.328971	0.407221	0.283287	0.425662	0.478875	1.16303	0.189101	6.1503	1	91	0.0149789	1	0.0657408	62	13	0.0540592	0.132816	0.743176	0.00621351	1	0.0323649
19.2429	6.38891	6.09823	-0.290677	0.426522	0.476366	0.455415	0.532881	0.908021	0.219988	4.1276	1	91	0.0451055	1	0.142839	62	13	0.0578378	0.147795	0.683623	0.0389733	1	0.120741
19.2445	6.32238	6.41569	0.0933104	0.555634	0.595555	0.562525	0.567266	0.0935693	0.317315	0.2949	1	91	0.588425	1	0.755863	62	13	0.0714408	0.157331	0.529777	0.74222	1	0.837648
19.2492	5.99906	5.80263	-0.196432	0.55074	0.202222	0.558734	0.410374	0.414665	0.288549	1.4371	1	91	0.233722	1	0.422836	62	13	0.0709593	0.113817	0.632754	0.136062	1	0.29997
19.2517	6.03301	6.03818	0.00516514	0.631662	0.639845	0.636192	0.591905	0.000286707	0.3958	0.0007	1	91	0.97895	1	0.985186	62	13	0.0807965	0.164165	0.501241	0.994416	1	1
19.2583	6.28854	6.57968	0.29114	0.600913	0.50244	0.614052	0.583195	0.910911	0.370986	2.4554	1	91	0.120592	1	0.280415	62	13	0.0779846	0.161749	0.638958	0.118619	1	0.272938
19.2587	3.59052	3.64114	0.0506214	0.636097	0.207027	0.619562	0.269716	0.0275386	0.332715	0.0828	1	91	0.774192	1	0.870225	62	13	0.0786844	0.0748056	0.71464	0.0157621	1	0.0627834
19.2671	6.337	6.07041	-0.266595	0.637919	0.44808	0.636839	0.543253	0.763795	0.387409	1.9715	1	91	0.163692	1	0.340308	62	13	0.0808786	0.150671	0.60794	0.226015	1	0.416852
19.2677	5.97356	5.49346	-0.480104	0.561261	0.318507	0.570193	0.432152	2.47711	0.302375	8.1922	1	91	0.00522024	1	0.0285622	62	13	0.0724146	0.119857	0.761787	0.00321661	1	0.0190584
19.2787	8.21643	8.48904	0.272608	0.368317	0.255046	0.497324	0.594905	0.798637	0.264852	3.0154	1	91	0.0858612	1	0.224852	62	13	0.0631603	0.164997	0.718362	0.0140349	1	0.0588722
19.281	6.40088	6.57038	0.169499	0.560273	0.698065	0.573472	0.635356	0.308752	0.341168	0.905	1	91	0.343964	1	0.547111	62	13	0.0728311	0.176216	0.549628	0.580361	1	0.745504
19.2945	6.3948	6.08344	-0.311351	0.527855	0.572484	0.540567	0.578445	1.04178	0.29918	3.4821	1	91	0.0652571	1	0.189766	62	13	0.0686521	0.160432	0.646402	0.100057	1	0.252272
19.2946	5.82447	6.6999	0.875433	0.768581	0.778409	0.749009	0.701324	8.23606	0.549646	14.9843	1	91	0.000203745	0.0965752	0.00175591	62	13	0.0951242	0.194512	0.775434	0.00193388	0.916661	0.0130952
19.2991	5.69494	5.81577	0.120827	0.550492	0.582906	0.568035	0.619982	0.156891	0.332809	0.4714	1	91	0.49409	1	0.676874	62	13	0.0721405	0.171952	0.557072	0.524232	1	0.697994
19.3112	5.37118	5.61134	0.240157	0.589818	0.305765	0.601079	0.46129	0.619817	0.336884	1.8399	1	91	0.178318	1	0.358524	62	13	0.0763372	0.127939	0.682382	0.0403184	1	0.124097
19.3195	7.02298	6.83683	-0.186146	0.452768	0.520213	0.477571	0.558566	0.372376	0.24187	1.5396	1	91	0.217867	1	0.405017	62	13	0.0606516	0.154918	0.594293	0.290636	1	0.483373
19.3232	7.40821	7.43785	0.0296321	0.411536	0.290468	0.455945	0.598716	0.00943621	0.232638	0.0406	1	91	0.840762	1	0.917835	62	13	0.057905	0.166054	0.554591	0.542628	1	0.710513
19.3362	6.42344	6.32819	-0.0952556	0.533106	0.632896	0.555746	0.601968	0.0975112	0.31765	0.307	1	91	0.580886	1	0.752295	62	13	0.0705798	0.166956	0.55335	0.551946	1	0.714815
19.34	6.05366	5.92126	-0.132401	0.491975	0.452395	0.515631	0.489862	0.188389	0.261616	0.7201	1	91	0.398338	1	0.591888	62	13	0.0654853	0.135863	0.590571	0.31023	1	0.496788
19.3538	7.22986	7.31892	0.0890619	0.549555	0.389024	0.574812	0.526639	0.0852427	0.321686	0.265	1	91	0.607954	1	0.762038	62	13	0.0730011	0.146063	0.57072	0.429063	1	0.610738
19.3542	6.2603	6.10236	-0.157939	0.629629	0.647239	0.628838	0.644458	0.268073	0.398706	0.6724	1	91	0.414359	1	0.608068	62	13	0.0798625	0.178741	0.591811	0.303604	1	0.491155
19.3641	6.31026	5.66077	-0.649496	0.643498	0.732646	0.641954	0.682209	4.53342	0.420867	10.7716	1	91	0.00146267	0.693307	0.00949736	62	13	0.0815282	0.189211	0.741935	0.00648293	1	0.0326905
19.377	6.3964	6.17048	-0.225922	0.589756	0.518129	0.595712	0.541757	0.54852	0.344784	1.5909	1	91	0.210421	1	0.398959	62	13	0.0756555	0.150256	0.614144	0.200309	1	0.392342
19.3795	6.6176	6.95094	0.33334	0.678041	0.249316	0.672324	0.330209	1.19412	0.39564	3.0182	1	91	0.0857182	1	0.224852	62	13	0.0853853	0.0915836	0.764268	0.0029372	1	0.0178492
19.417	6.87266	6.48268	-0.389982	0.312884	0.348004	0.347457	0.484884	1.63441	0.139529	11.7138	1	91	0.000931426	0.441496	0.00649259	62	13	0.044127	0.134483	0.799007	0.000762297	0.361329	0.00612422
19.4175	6.45793	6.77626	0.31833	0.576415	0.406866	0.575008	0.479508	1.08901	0.31408	3.4673	1	91	0.0658206	1	0.190238	62	13	0.0730261	0.132992	0.656328	0.0789949	1	0.211546
19.4213	6.57432	6.55526	-0.0190536	0.570509	0.417772	0.582201	0.46604	0.00390148	0.318942	0.0122	1	91	0.912293	1	0.949805	62	13	0.0739396	0.129256	0.508685	0.927511	1	0.95574
19.4335	5.81086	5.89073	0.0798702	0.43185	0.481453	0.460469	0.528126	0.0685556	0.223027	0.3074	1	91	0.58064	1	0.752295	62	13	0.0584796	0.146476	0.555831	0.53339	1	0.708198
19.4463	6.35633	6.38484	0.0285054	0.726738	0.720794	0.724253	0.702547	0.00873229	0.519452	0.0168	1	91	0.897157	1	0.946159	62	13	0.0919803	0.194852	0.514888	0.872126	1	0.924805
19.45	6.63446	6.12146	-0.512995	0.552258	0.639421	0.555707	0.59513	2.82813	0.316268	8.9422	1	91	0.00358424	1	0.0215054	62	13	0.0705748	0.165059	0.733251	0.0086821	1	0.0407457
19.4515	6.96359	6.84655	-0.117036	0.463583	0.470119	0.492689	0.563388	0.147202	0.255016	0.5772	1	91	0.449376	1	0.641579	62	13	0.0625716	0.156256	0.55335	0.551946	1	0.714815
19.4526	6.209	6.54713	0.338135	0.545694	0.373087	0.547584	0.437429	1.22872	0.282012	4.357	1	91	0.0396528	1	0.130524	62	13	0.0695433	0.121321	0.727047	0.0106388	1	0.0475737
19.4546	5.68578	5.87066	0.184878	0.547172	0.515887	0.564644	0.541884	0.367318	0.314683	1.1673	1	91	0.282812	1	0.474349	62	13	0.0717099	0.150292	0.622829	0.168004	1	0.35081
19.465	6.63204	6.49603	-0.136009	0.435737	0.395273	0.465012	0.528527	0.198797	0.226609	0.8773	1	91	0.351421	1	0.549748	62	13	0.0590566	0.146587	0.658809	0.0743358	1	0.201344
19.4679	6.0163	5.95859	-0.0577129	0.513535	0.781607	0.527026	0.752443	0.0357948	0.325167	0.1101	1	91	0.740793	1	0.848509	62	13	0.0669324	0.20869	0.511166	0.9053	1	0.941035
19.469	6.79512	6.20012	-0.594997	0.612196	0.520143	0.612869	0.524415	3.80455	0.359072	10.5955	1	91	0.00159258	0.754884	0.0102011	62	13	0.0778345	0.145446	0.760546	0.00336521	1	0.0194525
19.4889	6.04789	6.21453	0.166636	0.98101	0.518427	0.946944	0.554075	0.298409	0.799766	0.3731	1	91	0.542842	1	0.718735	62	13	0.120262	0.153673	0.57196	0.420939	1	0.608308
19.494	6.73093	7.16966	0.438739	0.494849	0.520697	0.525883	0.533775	2.06865	0.277928	7.4431	1	91	0.00764244	1	0.039107	62	13	0.0667872	0.148043	0.729529	0.00981341	1	0.0447265
19.5022	5.46081	5.28508	-0.175732	0.735152	0.625689	0.718916	0.604382	0.331877	0.491926	0.6746	1	91	0.413599	1	0.608068	62	13	0.0913024	0.167625	0.57072	0.429063	1	0.610738
19.508	4.16015	4.86712	0.706966	0.645387	0.689879	0.627764	0.589567	5.37119	0.386444	13.899	1	91	0.000334862	0.158725	0.00278464	62	13	0.0797261	0.163517	0.82134	0.000296809	0.140688	0.00281375
19.5307	5.87794	6.32747	0.449537	0.760322	0.301646	0.750975	0.429254	2.17172	0.501546	4.3301	1	91	0.040254	1	0.131589	62	13	0.0953739	0.119054	0.708437	0.0190579	1	0.0734426
19.5392	6.04271	6.15894	0.116226	0.6204	0.446303	0.626088	0.496376	0.145171	0.368053	0.3944	1	91	0.531569	1	0.713778	62	13	0.0795133	0.13767	0.563275	0.47968	1	0.659038
19.5401	5.87047	6.02252	0.152044	1.12577	0.663203	1.07963	0.640348	0.248435	1.0414	0.2386	1	91	0.626394	1	0.777253	62	13	0.137113	0.177601	0.602978	0.248212	1	0.442303
19.5406	6.8387	6.79846	-0.0402397	0.44302	0.386956	0.471872	0.503206	0.0174014	0.227685	0.0764	1	91	0.782863	1	0.875182	62	13	0.0599277	0.139564	0.526055	0.774169	1	0.857374
19.5535	6.01455	6.38039	0.365837	0.677104	0.680811	0.66632	0.675717	1.4383	0.446055	3.2245	1	91	0.075863	1	0.211524	62	13	0.0846227	0.18741	0.655087	0.081412	1	0.215583
19.555	5.85963	5.83291	-0.0267242	0.577437	0.571294	0.590443	0.580509	0.00767507	0.34671	0.0221	1	91	0.88215	1	0.937532	62	13	0.0749863	0.161004	0.516129	0.861115	1	0.917233
19.5632	8.13459	7.96997	-0.164619	1.03016	1.29766	1.00864	1.09004	0.291228	1.04543	0.2786	1	91	0.598905	1	0.762038	62	13	0.128097	0.302323	0.566998	0.453973	1	0.638526
19.5672	7.66581	7.48384	-0.181972	0.771754	0.616051	0.764186	0.619853	0.355862	0.551143	0.6457	1	91	0.423748	1	0.616125	62	13	0.0970517	0.171916	0.543424	0.629184	1	0.782764
19.6055	6.94463	6.91263	-0.0319939	0.865578	0.735024	0.839997	0.705603	0.0110004	0.671449	0.0164	1	91	0.898382	1	0.946159	62	13	0.10668	0.195699	0.522333	0.806505	1	0.870805
19.6138	6.12221	5.86437	-0.257839	0.623853	0.658741	0.624493	0.635862	0.71445	0.392347	1.821	1	91	0.180542	1	0.361084	62	13	0.0793107	0.176357	0.651365	0.0890252	1	0.231857
19.6139	6.0191	6.14693	0.127827	0.581638	0.328204	0.586452	0.424453	0.175597	0.317005	0.5539	1	91	0.458646	1	0.645099	62	13	0.0744794	0.117722	0.560794	0.497249	1	0.673417
19.6173	6.34216	6.28173	-0.0604289	0.680452	0.390346	0.679918	0.450232	0.0392431	0.419617	0.0935	1	91	0.760472	1	0.858949	62	13	0.0863496	0.124872	0.506203	0.949779	1	0.972344
19.6224	5.09369	5.36121	0.267521	0.41685	0.662983	0.437814	0.615762	0.769115	0.2225	3.4567	1	91	0.0662274	1	0.190253	62	13	0.0556024	0.170782	0.596774	0.278045	1	0.469016
19.6465	6.16401	5.82521	-0.338809	0.528203	0.608265	0.536586	0.596823	1.23362	0.299148	4.1238	1	91	0.0452023	1	0.142839	62	13	0.0681466	0.165529	0.669975	0.0560678	1	0.161067
19.651	7.15894	7.01312	-0.145824	0.44418	0.471957	0.46827	0.581407	0.228523	0.238799	0.957	1	91	0.330537	1	0.532907	62	13	0.0594704	0.161253	0.599256	0.265831	1	0.454888
19.654	6.52213	6.02585	-0.49628	0.432103	0.39199	0.455465	0.483533	2.64683	0.21178	12.498	1	91	0.000642866	0.304719	0.00461695	62	13	0.0578441	0.134108	0.810174	0.000479236	0.227158	0.00405639
19.6578	6.31221	6.27499	-0.0372195	0.630006	0.523096	0.626891	0.525481	0.0148873	0.373782	0.0398	1	91	0.842317	1	0.917835	62	13	0.0796152	0.145742	0.527295	0.763474	1	0.849499
19.6656	5.16425	5.49195	0.327696	0.700149	0.519132	0.69035	0.531739	1.15402	0.44472	2.5949	1	91	0.110672	1	0.267645	62	13	0.0876746	0.147478	0.626551	0.155423	1	0.331849
19.6854	5.98003	6.52211	0.542077	0.951598	0.869954	0.914184	0.7898	3.15788	0.800891	3.943	1	91	0.0500766	1	0.153138	62	13	0.116101	0.219051	0.667494	0.059766	1	0.170657
19.6937	5.80421	6.30407	0.499862	0.572888	0.512735	0.573802	0.546201	2.68519	0.324167	8.2833	1	91	0.00498574	1	0.0282632	62	13	0.0728729	0.151489	0.729529	0.00981341	1	0.0447265
19.6992	6.78412	6.66585	-0.118268	0.422075	0.257041	0.456547	0.403065	0.150316	0.200878	0.7483	1	91	0.38929	1	0.587739	62	13	0.0579816	0.11179	0.593052	0.297073	1	0.48724
19.6993	6.21628	6.29779	0.0815093	0.56541	0.422839	0.564979	0.489672	0.0713983	0.306146	0.2332	1	91	0.630321	1	0.779139	62	13	0.0717524	0.135811	0.540943	0.649193	1	0.787002
19.7001	6.27159	6.16464	-0.106951	0.572367	0.517752	0.588062	0.530101	0.122925	0.335163	0.3668	1	91	0.546261	1	0.721248	62	13	0.0746839	0.147024	0.559553	0.50616	1	0.67774
19.7056	6.24703	6.33162	0.0845894	0.617966	0.509392	0.611798	0.534971	0.0768963	0.359814	0.2137	1	91	0.644986	1	0.785921	62	13	0.0776985	0.148374	0.523573	0.795687	1	0.867024
19.7258	5.99281	5.92823	-0.0645778	0.476263	0.404815	0.492677	0.456263	0.0448167	0.23705	0.1891	1	91	0.664696	1	0.791621	62	13	0.0625701	0.126545	0.53598	0.689969	1	0.811527
19.7565	7.44245	8.24577	0.80332	1.31936	1.27301	1.26123	1.0676	6.93507	1.51657	4.5729	1	91	0.0351605	1	0.120769	62	13	0.160176	0.296098	0.673697	0.0508792	1	0.148869
19.7566	6.15303	6.24062	0.0875844	0.561197	0.424681	0.573163	0.470176	0.0824379	0.310853	0.2652	1	91	0.607819	1	0.762038	62	13	0.0727918	0.130403	0.564516	0.471024	1	0.650919
19.781	6.98449	6.60241	-0.382087	0.79172	0.953229	0.77063	0.875649	1.56891	0.62229	2.5212	1	91	0.115794	1	0.273066	62	13	0.0978701	0.242861	0.641439	0.112153	1	0.268487
19.84	6.84305	6.6151	-0.227954	0.521369	0.429434	0.528299	0.600184	0.558431	0.292435	1.9096	1	91	0.170391	1	0.349633	62	13	0.0670941	0.166461	0.641439	0.112153	1	0.268487
19.852	5.91516	5.75904	-0.15612	0.609508	0.467198	0.615616	0.468082	0.261934	0.352701	0.7427	1	91	0.391063	1	0.587739	62	13	0.0781833	0.129823	0.574442	0.404966	1	0.596129
19.886	8.29854	7.96365	-0.334896	1.0819	0.618527	1.07277	0.684298	1.2053	1.03863	1.1605	1	91	0.284209	1	0.474349	62	13	0.136242	0.18979	0.580645	0.366649	1	0.560618
19.996	5.78904	5.90194	0.112903	0.505975	0.60028	0.526144	0.570915	0.136988	0.284901	0.4808	1	91	0.489826	1	0.672979	62	13	0.0668204	0.158343	0.547146	0.599677	1	0.760019
19.1392 (1)	6.29229	5.83456	-0.457739	0.455033	0.49447	0.484326	0.544533	2.2517	0.244754	9.1998	1	91	0.00315382	1	0.0194144	62	13	0.0615095	0.151026	0.764268	0.0029372	1	0.0178492
19.1392 (2)	6.87946	6.5526	-0.326858	0.464541	0.455323	0.476624	0.480163	1.14813	0.227727	5.0417	1	91	0.0271661	1	0.102375	62	13	0.0605313	0.133173	0.705955	0.0205362	1	0.0772553
19.1392 (2)	6.59771	6.48557	-0.11214	0.461965	0.574751	0.497206	0.613326	0.135143	0.268412	0.5035	1	91	0.47978	1	0.666909	62	13	0.0631453	0.170106	0.532258	0.721161	1	0.829685
19.1783 (1)	7.52347	6.60218	-0.921292	0.664218	0.523898	0.683837	0.63232	9.12155	0.456487	19.9821	1	91	2.24766e-05	0.0106539	0.000273177	62	13	0.0868474	0.175374	0.880893	1.78757e-05	0.00847306	0.000282435
19.1783 (2)	6.70126	6.64903	-0.0522306	0.372324	0.569057	0.402204	0.592832	0.0293173	0.192949	0.1519	1	91	0.697637	1	0.812474	62	13	0.05108	0.164422	0.528536	0.752823	1	0.847597
19.1783 (3)	6.06643	7.50579	1.43936	0.476538	0.580786	0.496516	0.587123	22.2645	0.262668	84.7629	1	91	1.16573e-14	5.52558e-12	6.90697e-13	62	13	0.0630575	0.162839	0.970223	1.17311e-07	5.56054e-05	1.5007e-05
19.1800 (IPF7397)	7.21682	8.5589	1.34208	0.85566	0.612761	0.838687	0.72043	19.3566	0.673087	28.758	1	91	6.17751e-07	0.000292814	1.33097e-05	62	13	0.106513	0.199811	0.895782	8.27846e-06	0.00392399	0.000170608
19.1814 (1)	7.00283	6.69859	-0.304235	0.343927	0.423946	0.396532	0.494803	0.994698	0.171636	5.7954	1	91	0.0180869	1	0.075869	62	13	0.0503596	0.137234	0.687345	0.0351646	1	0.111866
19.1814 (2)	6.2855	5.72565	-0.559846	0.31458	0.354341	0.38527	0.427898	3.3683	0.154131	21.8534	1	91	1.01629e-05	0.00481722	0.000145976	62	13	0.0489294	0.118678	0.877171	2.15777e-05	0.0102278	0.00031962
19.1814 (3)	5.56746	6.02328	0.455826	0.484227	0.510094	0.513778	0.563888	2.23292	0.272845	8.1838	1	91	0.00524243	1	0.0285622	62	13	0.0652498	0.156394	0.734491	0.00833176	1	0.0394926
19.1844	5.31616	7.97103	2.65486	0.826319	0.88031	0.808858	0.832177	75.7458	0.660541	114.672	1	91	0	0	0	62	13	0.102725	0.230804	0.968983	1.26642e-07	6.00281e-05	1.5007e-05
19.2669 (1)	5.93966	5.8357	-0.103956	0.634625	0.867248	0.635556	0.778231	0.116137	0.437089	0.2657	1	91	0.607481	1	0.762038	62	13	0.0807157	0.215842	0.542184	0.639156	1	0.782842
19.2669 (2)	5.0886	5.90939	0.820785	0.456816	0.463162	0.470501	0.485352	7.2399	0.223705	32.3636	1	91	1.53775e-07	7.28894e-05	3.64447e-06	62	13	0.0597537	0.134612	0.890819	1.07323e-05	0.00508712	0.000203485
19.3060 (IPF9278)	6.61309	6.87262	0.259533	0.552586	0.487186	0.577537	0.555494	0.723866	0.329444	2.1972	1	91	0.141717	1	0.308136	62	13	0.0733473	0.154066	0.615385	0.195435	1	0.384383
19.3225 (1)	7.49874	7.71378	0.21504	0.324764	0.231884	0.413093	0.435547	0.49695	0.173778	2.8597	1	91	0.0942468	1	0.240638	62	13	0.0524629	0.120799	0.735732	0.00799413	1	0.0386655
19.3225 (2)	6.64707	6.83777	0.190699	0.48329	0.352576	0.496191	0.489201	0.390815	0.245074	1.5947	1	91	0.209882	1	0.398959	62	13	0.0630164	0.13568	0.621588	0.172363	1	0.355219
19.323 (1)	6.87053	5.98156	-0.888973	0.541037	0.498626	0.535837	0.548121	8.4928	0.28931	29.3553	1	91	4.89079e-07	0.000231823	1.10392e-05	62	13	0.0680514	0.152022	0.8933	9.42942e-06	0.00446954	0.000186231
19.323 (2)	5.25358	6.77925	1.52566	0.47563	0.583933	0.492669	0.559486	25.0145	0.254279	98.374	1	91	4.44089e-16	2.10498e-13	4.20997e-14	62	13	0.0625691	0.155173	0.960298	2.15245e-07	0.000102026	1.70043e-05
19.3298 (1)	7.00094	5.51077	-1.49017	0.870499	0.649734	0.850601	0.606278	23.8641	0.66501	35.8853	1	91	4.12573e-08	1.9556e-05	1.15035e-06	62	13	0.108026	0.168151	0.926799	1.52629e-06	0.000723459	4.82306e-05
19.3298 (2)	6.12171	6.19493	0.0732213	0.544663	0.695116	0.559583	0.640991	0.0576167	0.329199	0.175	1	91	0.676691	1	0.79789	62	13	0.0710671	0.177779	0.566998	0.453973	1	0.638526
19.3298 (3)	5.21406	6.11772	0.903657	0.385924	0.328536	0.423828	0.452439	8.77569	0.183752	47.7585	1	91	6.42556e-10	3.04571e-07	2.5381e-08	62	13	0.0538262	0.125484	0.955335	2.90235e-07	0.000137571	1.71964e-05
19.3628 (1)	6.20112	5.91782	-0.283302	0.51982	0.479812	0.52368	0.497666	0.862528	0.269874	3.196	1	91	0.0771474	1	0.212425	62	13	0.0665075	0.138028	0.655087	0.081412	1	0.215583
19.3628 (2)	6.52071	6.77511	0.254402	0.990486	0.446147	0.948574	0.481233	0.695531	0.789951	0.8805	1	91	0.350549	1	0.549748	62	13	0.120469	0.13347	0.611663	0.210323	1	0.403616
19.3910 (IPF15494)	5.71939	5.97488	0.255497	0.520138	0.707023	0.538523	0.656965	0.701529	0.313283	2.2393	1	91	0.138002	1	0.302838	62	13	0.0683924	0.182209	0.610422	0.215464	1	0.408519
19.3988 (IPF9655)	8.15847	8.10549	-0.0529783	0.749975	0.862581	0.787867	0.757166	0.0301627	0.612936	0.0492	1	91	0.824958	1	0.907263	62	13	0.100059	0.21	0.5	1	1	1
19.3994 (IPF9647)	6.9699	6.98209	0.0121885	0.450021	0.21034	0.480109	0.348078	0.00159651	0.21253	0.0075	1	91	0.931178	1	0.959518	62	13	0.0609739	0.0965394	0.538462	0.669459	1	0.801323
19.4668 (IPF7409)	6.72459	6.71431	-0.0102873	0.571806	0.33032	0.590885	0.50522	0.00113731	0.33371	0.0034	1	91	0.95363	1	0.967924	62	13	0.0750425	0.140123	0.506203	0.949779	1	0.972344
19.4738 (IPF10645)	6.14622	5.93655	-0.209673	0.617822	0.509478	0.622784	0.569162	0.472454	0.377354	1.252	1	91	0.266116	1	0.456519	62	13	0.0790937	0.157857	0.6067	0.231427	1	0.423537
19.4893 (1) (IPF12282)	5.54787	5.53094	-0.0169331	0.513133	0.31453	0.52896	0.408558	0.00308138	0.261243	0.0118	1	91	0.913737	1	0.949805	62	13	0.067178	0.113313	0.509926	0.916397	1	0.950486
19.4893 (2) (IPF12282)	6.98198	7.15813	0.176152	0.559364	0.482135	0.565747	0.516194	0.333464	0.311257	1.0713	1	91	0.303395	1	0.502829	62	13	0.0718499	0.143167	0.58933	0.316951	1	0.504144
19.5095 (1)	7.9286	7.39101	-0.537591	1.20284	1.08455	1.15481	0.953422	3.10583	1.26379	2.4576	1	91	0.120428	1	0.280415	62	13	0.146661	0.264432	0.632754	0.136062	1	0.29997
19.5095 (2)	7.54008	7.70028	0.160198	1.33363	0.705275	1.27538	0.667113	0.275796	1.43236	0.1925	1	91	0.661884	1	0.791621	62	13	0.161973	0.185024	0.55335	0.551946	1	0.714815
19.517 (1)	6.91174	6.72397	-0.18777	0.618222	0.424959	0.612899	0.5244	0.378902	0.3591	1.0551	1	91	0.307058	1	0.506943	62	13	0.0778383	0.145442	0.605459	0.23693	1	0.431941
19.517 (2)	5.93935	6.00074	0.0613949	0.514538	0.43168	0.535147	0.534664	0.0405078	0.286298	0.1415	1	91	0.70767	1	0.820136	62	13	0.0679638	0.148289	0.533499	0.710709	1	0.823657
19.5244 (1)	6.59639	5.42973	-1.16666	0.476072	0.690593	0.50706	0.645796	14.6272	0.283402	51.613	1	91	1.80379e-10	8.54998e-08	7.77271e-09	62	13	0.0643967	0.179112	0.937965	8.06737e-07	0.000382393	2.94149e-05
19.5244 (2)	5.65916	6.03596	0.376797	0.549159	0.421032	0.569964	0.477935	1.52577	0.309006	4.9377	1	91	0.0287559	1	0.106487	62	13	0.0723855	0.132555	0.69727	0.0265256	1	0.0931343
19.600 (1)	7.29701	6.17524	-1.12177	0.52475	0.631848	0.563698	0.597491	13.5232	0.324206	41.7118	1	91	5.09201e-09	2.41361e-06	1.72401e-07	62	13	0.0715897	0.165714	0.921836	2.01636e-06	0.000955756	5.97348e-05
19.600 (2)	6.10294	7.03329	0.930347	0.61823	0.675788	0.617682	0.740958	9.30172	0.409063	22.7391	1	91	7.01846e-06	0.00332675	0.000107315	62	13	0.0784457	0.205505	0.852357	7.24847e-05	0.0343578	0.000904151
19.6070 (1)	6.36265	6.12704	-0.235608	0.688426	0.551115	0.688417	0.535393	0.596562	0.443133	1.3462	1	91	0.248978	1	0.43872	62	13	0.087429	0.148491	0.593052	0.297073	1	0.48724
19.6070 (2)	5.92667	5.67248	-0.254182	0.93104	0.751021	0.901047	0.69911	0.694328	0.758769	0.9151	1	91	0.341299	1	0.5447	62	13	0.114433	0.193898	0.57072	0.429063	1	0.610738
19.682 (1)	7.07828	5.25953	-1.81875	0.54122	0.72702	0.561577	0.669396	35.5484	0.337186	105.427	1	91	0	0	0	62	13	0.0713203	0.185657	0.945409	5.22913e-07	0.000247861	2.47861e-05
19.682 (2)	4.82602	6.74114	1.91511	0.678051	0.771197	0.667434	0.680683	39.4151	0.448404	87.9009	1	91	5.10703e-15	2.42073e-12	3.45819e-13	62	13	0.0847642	0.188787	0.941687	6.50056e-07	0.000308127	2.80115e-05
19.6861 (1) (IPF9828)	7.31179	7.61218	0.300387	0.46065	0.40414	0.512198	0.451456	0.969698	0.252724	3.837	1	91	0.0531948	1	0.158581	62	13	0.0650492	0.125211	0.704715	0.0213122	1	0.0795432
19.6861 (2) (IPF9828)	6.32062	7.1114	0.790779	0.698396	0.649824	0.687407	0.622395	6.72024	0.45853	14.656	1	91	0.000236612	0.112154	0.00200275	62	13	0.0873007	0.172621	0.792804	0.00098019	0.46461	0.00714785
19.7096 (1) (IPF553)	5.85441	5.83482	-0.0195913	0.501843	0.596674	0.516487	0.627387	0.00412479	0.287612	0.0143	1	91	0.905077	1	0.94913	62	13	0.0655939	0.174006	0.513648	0.883162	1	0.930264
19.7096 (2) (IPF553)	6.449	5.94695	-0.502058	0.443861	0.403554	0.463643	0.530926	2.70883	0.225965	11.9878	1	91	0.000817851	0.387662	0.00578599	62	13	0.0588827	0.147252	0.80273	0.000654114	0.31005	0.00534569
19.7167 (IPF20175)	5.68954	5.92943	0.239891	0.858496	0.759279	0.837432	0.709701	0.618445	0.668807	0.9247	1	91	0.338792	1	0.542525	62	13	0.106354	0.196836	0.619107	0.181335	1	0.368896
19.7214 (IPF885)	5.86915	6.68198	0.812826	0.661591	0.85009	0.66392	0.757306	7.10018	0.462607	15.3482	1	91	0.000172748	0.0818825	0.00157853	62	13	0.084318	0.210039	0.764268	0.0029372	1	0.0178492
19.7473 (1) (IPF2500)	5.3738	5.46853	0.0947338	0.468013	0.569963	0.493429	0.54119	0.096446	0.251595	0.3833	1	91	0.537389	1	0.717528	62	13	0.0626656	0.150099	0.512407	0.89422	1	0.935674
19.7473 (2) (IPF2500)	6.34065	6.57534	0.234689	0.559747	0.967362	0.573091	0.844877	0.591917	0.391784	1.5108	1	91	0.222186	1	0.408202	62	13	0.0727826	0.234327	0.602978	0.248212	1	0.442303
19.932 (2)	7.61245	7.98281	0.370361	0.486267	0.368344	0.528791	0.588417	1.47409	0.29057	5.0731	1	91	0.0267046	1	0.10208	62	13	0.0671565	0.163197	0.790323	0.00108249	0.513103	0.00777428
19.932 (3)	7.09681	6.60033	-0.496485	0.600055	0.735629	0.60232	0.726646	2.64902	0.38995	6.7932	1	91	0.0106914	1	0.050677	62	13	0.0764948	0.201535	0.7134	0.016378	1	0.0641583
19.936 (IPF9398)	6.184	5.92424	-0.259764	0.492977	0.373297	0.503549	0.431485	0.725158	0.242485	2.9905	1	91	0.0871452	1	0.226961	62	13	0.0639508	0.119672	0.677419	0.0460989	1	0.138297
ADH1	6.09882	6.3923	0.293477	0.510762	0.559363	0.526963	0.595707	0.925596	0.290376	3.1876	1	91	0.0775305	1	0.212425	62	13	0.0669243	0.165219	0.629032	0.147442	1	0.31912
ADP1 (1)	6.30492	6.11211	-0.192812	0.530164	0.484391	0.538184	0.538356	0.399522	0.289672	1.3792	1	91	0.243302	1	0.431929	62	13	0.0683494	0.149313	0.599256	0.265831	1	0.454888
ADP1 (2)	6.16048	5.84494	-0.315545	0.630791	0.573457	0.627487	0.60834	1.07003	0.38985	2.7447	1	91	0.101022	1	0.249397	62	13	0.0796909	0.168723	0.633995	0.132424	1	0.294689
ALS1 (1)	6.12814	6.63266	0.50452	0.67478	0.440548	0.669883	0.560203	2.73546	0.426565	6.4128	1	91	0.0130438	1	0.0588832	62	13	0.0850752	0.155372	0.717122	0.0145911	1	0.0601408
ALS1 (2)	7.96677	8.03187	0.0650963	0.890932	1.23117	0.877313	1.01524	0.0455393	0.812589	0.056	1	91	0.813465	1	0.898794	62	13	0.111419	0.281577	0.560794	0.497249	1	0.673417
ALS10 (2)	6.78358	6.33417	-0.449407	0.645921	0.933775	0.645569	0.798526	2.17047	0.453069	4.7906	1	91	0.0311752	1	0.111947	62	13	0.0819873	0.221471	0.641439	0.112153	1	0.268487
ALS10 (3)	7.47375	7.55222	0.0784698	0.584309	0.367344	0.613985	0.484538	0.0661728	0.353602	0.1871	1	91	0.666365	1	0.791621	62	13	0.0779762	0.134387	0.559553	0.50616	1	0.67774
ALS11	6.34473	6.43313	0.0883997	0.685867	0.380253	0.695272	0.445394	0.0839799	0.436549	0.1924	1	91	0.661966	1	0.791621	62	13	0.0882996	0.12353	0.523573	0.795687	1	0.867024
ALS2	7.81772	7.53848	-0.279242	0.622276	0.48804	0.617152	0.53754	0.837985	0.365766	2.291	1	91	0.133592	1	0.297326	62	13	0.0783784	0.149087	0.635236	0.128861	1	0.288113
ALS3 (1)	6.51899	6.79357	0.274575	0.557774	0.652798	0.562533	0.642438	0.810204	0.33227	2.4384	1	91	0.121868	1	0.280415	62	13	0.0714417	0.17818	0.578164	0.381696	1	0.578032
ALS3 (2)	8.43174	8.43221	0.000475719	0.831512	1.03877	0.844748	0.954409	2.43206e-06	0.746031	0	1	91	1	1	1	62	13	0.107283	0.264705	0.513648	0.883162	1	0.930264
ALS4	5.68098	5.71729	0.0363042	0.65048	0.441007	0.656783	0.494637	0.0141641	0.400674	0.0354	1	91	0.851179	1	0.923247	62	13	0.0834116	0.137188	0.529777	0.74222	1	0.837648
ALS5 (1)	5.61372	6.04078	0.427059	0.64036	0.564819	0.650735	0.591162	1.95997	0.411295	4.7654	1	91	0.0316109	1	0.112658	62	13	0.0826435	0.163959	0.691067	0.0316782	1	0.105003
ALS5 (2)	7.60883	8.02978	0.420943	0.638459	0.521779	0.660509	0.597455	1.90423	0.423233	4.4993	1	91	0.0366277	1	0.124903	62	13	0.0838847	0.165704	0.720844	0.0129784	1	0.0554214
ALS6 (1)	6.78302	5.76943	-1.01358	0.590081	0.342481	0.599118	0.467762	11.0406	0.335906	32.8681	1	91	1.27041e-07	6.02175e-05	3.16934e-06	62	13	0.0760881	0.129734	0.935484	9.30768e-07	0.000441184	3.15132e-05
ALS6 (2)	5.47702	6.65436	1.17734	0.44028	0.891006	0.464726	0.770672	14.8963	0.278102	53.5641	1	91	9.61269e-11	4.55641e-08	4.55641e-09	62	13	0.0590203	0.213746	0.916873	2.65576e-06	0.00125883	7.40488e-05
ALS6 (3)	5.8347	5.72002	-0.114674	0.638857	0.498827	0.632256	0.514238	0.14132	0.377506	0.3744	1	91	0.542141	1	0.718735	62	13	0.0802966	0.142624	0.540943	0.649193	1	0.787002
ALS7 (1)	6.35562	6.51656	0.160941	1.21437	1.4418	1.16345	1.17637	0.278362	1.35858	0.2049	1	91	0.651872	1	0.790249	62	13	0.147758	0.326267	0.531017	0.731665	1	0.835685
ALS7 (2)	6.29635	6.13055	-0.165798	0.40155	0.403381	0.440052	0.449305	0.295416	0.194999	1.515	1	91	0.22155	1	0.408202	62	13	0.0558867	0.124615	0.6067	0.231427	1	0.423537
ALS7(3)	6.31107	6.45037	0.139301	0.546132	0.430451	0.553759	0.476444	0.208536	0.293556	0.7104	1	91	0.401521	1	0.594659	62	13	0.0703275	0.132142	0.559553	0.50616	1	0.67774
ALS8 (1)	6.42888	6.65117	0.222291	0.464793	0.517409	0.489774	0.535021	0.531029	0.247501	2.1456	1	91	0.146426	1	0.311236	62	13	0.0622014	0.148388	0.616625	0.190648	1	0.382913
ALS8 (2)	6.27918	6.38387	0.104693	0.99683	1.04048	0.961802	0.901852	0.11779	0.906697	0.1299	1	91	0.719371	1	0.831663	62	13	0.122149	0.250129	0.511166	0.9053	1	0.941035
ALS9 (1)	5.13812	5.41381	0.275696	0.525007	0.485865	0.535522	0.533958	0.816835	0.286509	2.851	1	91	0.0947413	1	0.240638	62	13	0.0680114	0.148093	0.665012	0.0636644	1	0.179625
ALS9 (2)	6.30657	7.3064	0.999831	0.669468	0.409567	0.663303	0.490993	10.743	0.407275	26.3778	1	91	1.58768e-06	0.000752559	3.13566e-05	62	13	0.0842396	0.136177	0.913151	3.25869e-06	0.00154462	8.58121e-05
ALS9 (3)	4.8053	4.56623	-0.239067	0.587833	0.676593	0.584443	0.573456	0.614203	0.339482	1.8092	1	91	0.181947	1	0.362365	62	13	0.0742243	0.159048	0.650124	0.0916868	1	0.234917
ARR3	5.75717	5.30018	-0.456989	0.692425	0.716392	0.696316	0.652772	2.24433	0.4752	4.7229	1	91	0.0323604	1	0.113621	62	13	0.0884323	0.181046	0.677419	0.0460989	1	0.138297
ATC1 (1)	6.00196	5.2838	-0.718157	0.448954	0.497418	0.47194	0.537438	5.54258	0.233595	23.7273	1	91	4.66223e-06	0.0022099	7.62033e-05	62	13	0.0599364	0.149058	0.844913	0.000102752	0.0487043	0.00118791
ATC1 (2)	5.29212	5.4793	0.187176	0.529274	0.312685	0.539136	0.415897	0.376508	0.27132	1.3877	1	91	0.241865	1	0.430993	62	13	0.0684704	0.115349	0.635236	0.128861	1	0.288113
AXL1 (1)	6.55419	5.62629	-0.927905	0.482205	0.496627	0.510462	0.548389	9.25295	0.267173	34.6328	1	91	6.55705e-08	3.10804e-05	1.72669e-06	62	13	0.0648287	0.152096	0.905707	4.88134e-06	0.00231375	0.000121776
AXL1 (2)	5.69195	6.30792	0.615967	0.536122	0.535819	0.556449	0.547117	4.07745	0.307943	13.2409	1	91	0.000454189	0.215286	0.00344229	62	13	0.0706691	0.151743	0.796526	0.000843409	0.399776	0.006448
AXL2 (1)	6.97763	6.65763	-0.319998	0.551667	0.354738	0.561691	0.457738	1.10045	0.298077	3.6918	1	91	0.0578103	1	0.170199	62	13	0.0713349	0.126954	0.691067	0.0316782	1	0.105003
AXL2 (2)	6.16026	5.90681	-0.253443	0.611724	0.640501	0.610548	0.59084	0.690296	0.368877	1.8713	1	91	0.174695	1	0.355388	62	13	0.0775397	0.16387	0.62531	0.159535	1	0.336087
BGL2	7.31721	8.20075	0.883538	0.610425	0.610732	0.630395	0.709852	8.38927	0.414904	20.2198	1	91	2.03028e-05	0.0096235	0.00025325	62	13	0.0800603	0.196877	0.866005	3.75696e-05	0.017808	0.000539636
BIG1	6.85463	6.86921	0.0145768	0.356242	0.424207	0.38948	0.54945	0.0022835	0.176385	0.0129	1	91	0.909822	1	0.949805	62	13	0.049464	0.15239	0.506203	0.949779	1	0.972344
BMH1	6.33235	6.12149	-0.210859	0.514635	0.458079	0.527811	0.486698	0.477814	0.271728	1.7584	1	91	0.188143	1	0.367311	62	13	0.067032	0.134986	0.650124	0.0916868	1	0.234917
BUL1	5.83498	5.59785	-0.237129	0.606139	0.373496	0.606412	0.471983	0.604287	0.343905	1.7571	1	91	0.188305	1	0.367311	62	13	0.0770144	0.130905	0.62531	0.159535	1	0.336087
CAG1	7.07791	7.65608	0.578166	0.368896	0.836999	0.419765	0.729563	3.59236	0.234733	15.304	1	91	0.000176239	0.0835371	0.00157853	62	13	0.0533102	0.202344	0.760546	0.00336521	1	0.0194525
CAN1	6.33078	6.22435	-0.106426	0.555635	0.819607	0.562199	0.732272	0.121721	0.352257	0.3455	1	91	0.558127	1	0.732374	62	13	0.0713993	0.203096	0.629032	0.147442	1	0.31912
CDC19	6.13398	6.88546	0.751481	0.573457	1.25223	0.582792	1.03201	6.06889	0.458889	13.2252	1	91	0.000457519	0.216864	0.00344229	62	13	0.0740147	0.286227	0.705955	0.0205362	1	0.0772553
CDC24 (1)	7.97662	8.1858	0.209188	0.346583	0.204531	0.426993	0.52984	0.470271	0.1985	2.3691	1	91	0.127229	1	0.288842	62	13	0.0542282	0.146951	0.698511	0.0255868	1	0.0911892
CDC24 (2)	5.38763	5.16982	-0.217807	0.519653	0.46875	0.533848	0.488244	0.509821	0.277331	1.8383	1	91	0.178505	1	0.358524	62	13	0.0677987	0.135415	0.641439	0.112153	1	0.268487
CDR1(1)	7.43709	5.58997	-1.84712	0.494624	0.702205	0.5286	0.644027	36.666	0.301668	121.544	1	91	0	0	0	62	13	0.0671322	0.178621	0.990074	3.35966e-08	1.59248e-05	1.5007e-05
CDR1(2)	6.60797	6.78516	0.177188	0.474968	0.698257	0.51299	0.638362	0.337398	0.286887	1.1761	1	91	0.281016	1	0.474027	62	13	0.0651497	0.17705	0.55335	0.551946	1	0.714815
CDR1(2)	6.15305	6.14404	-0.00900941	0.583002	0.557022	0.59241	0.531828	0.000872302	0.339753	0.0026	1	91	0.959445	1	0.969674	62	13	0.0752361	0.147503	0.522333	0.806505	1	0.870805
CDR1(3)	5.42337	6.89147	1.4681	0.643404	0.530458	0.635414	0.589622	23.1624	0.394529	58.7089	1	91	1.90612e-11	9.03501e-09	1.00389e-09	62	13	0.0806976	0.163532	0.96402	1.71674e-07	8.13733e-05	1.62747e-05
CDR11 (1)	6.64107	5.67543	-0.965642	0.638505	0.960841	0.6311	0.841625	10.0209	0.449254	22.3056	1	91	8.40904e-06	0.00398589	0.000124559	62	13	0.0801498	0.233425	0.815136	0.00038804	0.183931	0.00340613
CDR11 (2)	6.51011	6.19713	-0.31298	0.327562	0.529936	0.377721	0.529069	1.05271	0.165233	6.371	1	91	0.0133334	1	0.0596231	62	13	0.0479706	0.146737	0.753102	0.0043958	1	0.0251037
CDR11 (3.1)	5.90713	6.28683	0.379704	0.540529	0.567993	0.551988	0.552659	1.5494	0.304812	5.0831	1	91	0.0265594	1	0.10208	62	13	0.0701025	0.15328	0.683623	0.0389733	1	0.120741
CDR11 (3.2)	5.79535	5.89262	0.0972681	0.441126	0.677327	0.468794	0.621732	0.101675	0.247184	0.4113	1	91	0.522922	1	0.704298	62	13	0.0595369	0.172438	0.547146	0.599677	1	0.760019
CDR2 (1)	5.29059	5.04663	-0.243966	0.499147	0.368433	0.51076	0.430774	0.639637	0.248496	2.574	1	91	0.112098	1	0.268356	62	13	0.0648666	0.119475	0.640199	0.11535	1	0.272938
CDR2 (2)	4.7349	5.4595	0.724592	0.440668	0.542081	0.454505	0.554515	5.64235	0.223163	25.2835	1	91	2.46844e-06	0.00117004	4.50015e-05	62	13	0.0577222	0.153795	0.843672	0.000108833	0.0515871	0.00122826
CDR3	6.37075	6.25774	-0.113012	0.447942	0.393462	0.474783	0.448592	0.137253	0.221443	0.6198	1	91	0.433167	1	0.620306	62	13	0.0602975	0.124417	0.586849	0.330678	1	0.517298
CDR4 (1)	7.85848	7.09199	-0.766494	0.337034	0.489442	0.382458	0.570155	6.31381	0.175666	35.9421	1	91	4.04043e-08	1.91517e-05	1.15035e-06	62	13	0.0485722	0.158132	0.899504	6.80039e-06	0.00322339	0.000161169
CDR4 (2)	6.82932	6.58442	-0.244893	0.312771	0.471353	0.36493	0.585475	0.644503	0.16763	3.8448	1	91	0.0529584	1	0.158581	62	13	0.0463462	0.162381	0.64268	0.109026	1	0.268487
CDR4 (3)	6.33739	7.88646	1.54907	0.485524	0.564885	0.505523	0.664517	25.7878	0.286133	90.1253	1	91	2.88658e-15	1.36824e-12	2.2804e-13	62	13	0.0642014	0.184304	0.956576	2.69413e-07	0.000127702	1.71964e-05
CEF3 (1)	3.37462	3.67401	0.299385	0.184655	0.246213	0.235485	0.325892	0.963235	0.0637961	15.0987	1	91	0.000193428	0.0916848	0.00169787	62	13	0.0299066	0.0903861	0.864764	3.99199e-05	0.018922	0.00055653
CEF3 (2)	6.58142	6.30475	-0.276671	0.674173	0.604093	0.675363	0.606768	0.822624	0.441658	1.8626	1	91	0.17569	1	0.355885	62	13	0.0857712	0.168287	0.60794	0.226015	1	0.416852
CFL1	6.78641	6.53254	-0.253874	0.50471	0.507717	0.524939	0.571731	0.692646	0.283996	2.4389	1	91	0.12183	1	0.280415	62	13	0.0666673	0.15857	0.647643	0.0972018	1	0.246383
CFL2	6.48939	6.47608	-0.0133062	0.614383	0.530792	0.620141	0.559092	0.00190276	0.372741	0.0051	1	91	0.943225	1	0.967724	62	13	0.078758	0.155064	0.529777	0.74222	1	0.837648
CFL4	6.2477	6.11854	-0.129167	0.447077	0.656975	0.466244	0.624232	0.179299	0.245703	0.7297	1	91	0.395224	1	0.590965	62	13	0.059213	0.173131	0.527295	0.763474	1	0.849499
CFL5	6.48729	6.71185	0.224556	0.683172	0.497081	0.680543	0.548613	0.541903	0.436482	1.2415	1	91	0.268116	1	0.456519	62	13	0.086429	0.152158	0.615385	0.195435	1	0.384383
CHK1 (1)	6.4703	6.04608	-0.424219	0.385888	0.376993	0.408295	0.487759	1.93399	0.178409	10.8402	1	91	0.00141508	0.670746	0.00931592	62	13	0.0518535	0.13528	0.782878	0.00145164	0.688079	0.0102698
CHK1 (2)	5.99392	5.89183	-0.102095	0.384367	0.323473	0.418947	0.443861	0.112017	0.17905	0.6256	1	91	0.43103	1	0.620306	62	13	0.0532063	0.123105	0.575682	0.397117	1	0.588229
CHK1 (3)	5.41371	5.9874	0.573689	0.468339	0.606259	0.486111	0.599494	3.53693	0.256538	13.7871	1	91	0.000352606	0.167135	0.00288165	62	13	0.0617362	0.16627	0.761787	0.00321661	1	0.0190584
CHS1 (1)	6.71321	6.34059	-0.372621	0.633544	0.675461	0.632762	0.642834	1.49213	0.4025	3.7072	1	91	0.0573009	1	0.169754	62	13	0.0803609	0.17829	0.674938	0.0492416	1	0.144972
CHS1 (2)	6.02545	6.51887	0.493413	0.580721	0.411268	0.589668	0.531538	2.61634	0.336995	7.7637	1	91	0.00648737	1	0.0345507	62	13	0.074888	0.147422	0.751861	0.00459304	1	0.025613
CHS2 (1)	8.61734	9.01907	0.401723	0.415625	0.472104	0.52579	0.632166	1.73431	0.296704	5.8453	1	91	0.0176118	1	0.0745357	62	13	0.0667754	0.175331	0.725806	0.0110743	1	0.049058
CHS2 (2)	7.01504	6.98598	-0.0290595	1.06484	0.370617	1.02066	0.478122	0.00907506	0.908076	0.01	1	91	0.920564	1	0.952724	62	13	0.129624	0.132607	0.537221	0.679684	1	0.803418
CHS8 (1)	7.15258	6.14331	-1.00927	0.871509	0.393156	0.844481	0.441851	10.9469	0.628011	17.431	1	91	6.81311e-05	0.0322942	0.000717648	62	13	0.107249	0.122548	0.898263	7.26253e-06	0.00344244	0.000163926
CHS8 (2)	5.8372	6.53723	0.700031	0.538377	0.435474	0.547022	0.530844	5.26633	0.296367	17.7697	1	91	5.86932e-05	0.0278206	0.000632286	62	13	0.0694719	0.14723	0.841191	0.00012203	0.0578423	0.00128538
CHT1	5.24148	5.61284	0.371366	0.849244	0.961891	0.82319	0.829143	1.4821	0.679259	2.1819	1	91	0.143094	1	0.309711	62	13	0.104545	0.229963	0.610422	0.215464	1	0.408519
CHT2	6.24743	6.23467	-0.0127583	0.538885	0.422438	0.543092	0.482607	0.00174927	0.28475	0.0061	1	91	0.937918	1	0.964367	62	13	0.0689727	0.133851	0.512407	0.89422	1	0.935674
CNH1 (1)	6.81849	7.00153	0.18304	1.03135	1.35192	0.993289	1.11229	0.360054	1.02781	0.3503	1	91	0.555411	1	0.731291	62	13	0.126148	0.308495	0.526055	0.774169	1	0.857374
CNH1 (2)	5.24926	5.80925	0.559983	0.482923	0.477413	0.499662	0.542294	3.36995	0.256964	13.1145	1	91	0.000481724	0.228337	0.00356777	62	13	0.0634571	0.150405	0.810174	0.000479236	0.227158	0.00405639
CNT	7.27804	7.45633	0.178293	0.40837	0.459422	0.462203	0.614575	0.341621	0.240602	1.4199	1	91	0.236518	1	0.423055	62	13	0.0586998	0.170452	0.62531	0.159535	1	0.336087
CRH11	6.28376	7.06897	0.785211	1.10119	0.777461	1.05812	0.765446	6.62592	1.03189	6.4211	1	91	0.012987	1	0.0588832	62	13	0.134382	0.212297	0.751861	0.00459304	1	0.025613
CRH12	6.603	6.44883	-0.154168	0.55172	0.375238	0.57269	0.458705	0.255425	0.308648	0.8276	1	91	0.365371	1	0.564123	62	13	0.0727317	0.127222	0.641439	0.112153	1	0.268487
CRP1 (1)	6.5341	6.37661	-0.157487	0.571081	0.395207	0.587428	0.531699	0.266541	0.334819	0.7961	1	91	0.374615	1	0.572799	62	13	0.0746034	0.147467	0.590571	0.31023	1	0.496788
CRP1 (2)	7.58329	7.60712	0.0238256	0.406299	0.318544	0.475674	0.435448	0.00610043	0.220241	0.0277	1	91	0.868185	1	0.93046	62	13	0.0604106	0.120771	0.554591	0.542628	1	0.710513
CSA1 (1)	7.29422	7.31434	0.0201193	1.53905	1.08474	1.45963	0.909789	0.0043501	1.91635	0.0023	1	91	0.961855	1	0.970041	62	13	0.185373	0.25233	0.532258	0.721161	1	0.829685
CSA1 (2)	6.59878	7.83399	1.2352	1.23134	0.842877	1.17558	0.806018	16.3965	1.26161	12.9965	1	91	0.000508981	0.241257	0.00371164	62	13	0.149299	0.223549	0.797767	0.000801902	0.380101	0.00633502
CSC25	6.04767	6.41869	0.371016	0.628304	0.328068	0.635265	0.405892	1.47931	0.364305	4.0606	1	91	0.0468456	1	0.14513	62	13	0.0806787	0.112574	0.69727	0.0265256	1	0.0931343
CSH1	3.36924	3.66053	0.291287	0.181414	0.261036	0.222824	0.323458	0.911837	0.0586874	15.5372	1	91	0.000158605	0.0751789	0.00150358	62	13	0.0282986	0.0897112	0.842432	0.000115254	0.0546303	0.0012416
CSP37	5.41041	5.49914	0.0887341	0.629756	0.511139	0.6269	0.520281	0.0846165	0.372898	0.2269	1	91	0.634974	1	0.779735	62	13	0.0796164	0.1443	0.519851	0.828252	1	0.892253
CWH41	9.29696	9.05379	-0.243169	0.907757	0.60789	0.908868	0.673641	0.635465	0.764849	0.8308	1	91	0.36445	1	0.564123	62	13	0.115426	0.186834	0.57196	0.420939	1	0.608308
CYC3	6.78229	6.24786	-0.534428	1.0677	0.62231	1.03013	0.571725	3.0694	0.940468	3.2637	1	91	0.0741345	1	0.207928	62	13	0.130827	0.158568	0.641439	0.112153	1	0.268487
CYR1 (1)	6.82231	6.1375	-0.684809	0.455273	0.598533	0.486352	0.558659	5.03979	0.248959	20.2435	1	91	2.00982e-05	0.00952654	0.00025325	62	13	0.0617667	0.154944	0.816377	0.000367923	0.174396	0.00335376
CYR1 (2)	6.2322	6.71334	0.481145	0.628837	0.305824	0.61956	0.483703	2.48786	0.359216	6.9258	1	91	0.00997952	1	0.0477807	62	13	0.0786842	0.134155	0.746898	0.00546466	1	0.0294347
CYR1 (3)	5.58711	5.92431	0.337199	0.693325	0.669777	0.692722	0.600368	1.22193	0.460233	2.655	1	91	0.106682	1	0.261451	62	13	0.0879758	0.166512	0.616625	0.190648	1	0.382913
DAL52	5.83463	6.03873	0.204101	0.49094	0.528692	0.506998	0.529006	0.447677	0.260795	1.7166	1	91	0.193429	1	0.375759	62	13	0.0643888	0.14672	0.599256	0.265831	1	0.454888
DFG5	6.65908	6.64821	-0.0108657	0.653459	0.268476	0.639984	0.45083	0.00126878	0.375662	0.0034	1	91	0.95363	1	0.967924	62	13	0.0812781	0.125038	0.548387	0.589983	1	0.753778
EBP1	5.87886	5.79784	-0.0810244	0.561836	0.446028	0.57763	0.519009	0.0705513	0.323089	0.2184	1	91	0.641379	1	0.783633	62	13	0.0733591	0.143947	0.534739	0.700311	1	0.813596
ECE1	6.82504	7.9538	1.12876	1.57804	1.39534	1.4911	1.16398	13.6924	2.0806	6.581	1	91	0.011943	1	0.0549611	62	13	0.18937	0.32283	0.717122	0.0145911	1	0.0601408
ECM331	5.21879	4.90267	-0.316123	0.772598	0.353836	0.753289	0.392922	1.07396	0.499545	2.1499	1	91	0.146026	1	0.311236	62	13	0.0956679	0.108977	0.600496	0.259865	1	0.452853
EFG1	7.353	7.45632	0.103321	0.642553	0.386147	0.646885	0.630114	0.114724	0.414939	0.2765	1	91	0.600284	1	0.762038	62	13	0.0821545	0.174762	0.601737	0.253992	1	0.445897
EFT2 (1)	7.81345	8.34058	0.527126	0.857257	0.768084	0.828244	0.754596	2.98609	0.666826	4.4781	1	91	0.0370623	1	0.125254	62	13	0.105187	0.209287	0.693548	0.0295224	1	0.100673
EFT2 (2)	6.19456	6.52579	0.331237	0.540429	0.520908	0.541337	0.595967	1.1791	0.303259	3.8881	1	91	0.0516663	1	0.155986	62	13	0.0687499	0.165292	0.641439	0.112153	1	0.268487
ENO1	5.50018	5.52414	0.0239619	0.629759	0.529715	0.625981	0.532884	0.00617045	0.374118	0.0165	1	91	0.898074	1	0.946159	62	13	0.0794997	0.147795	0.516129	0.861115	1	0.917233
ERG25	5.66097	5.55364	-0.107332	0.765576	0.608677	0.757232	0.575815	0.123803	0.533646	0.232	1	91	0.631201	1	0.779139	62	13	0.0961685	0.159702	0.542184	0.639156	1	0.782842
ERG7	6.50644	6.58641	0.0799732	0.446604	0.30164	0.473264	0.514958	0.0687326	0.230752	0.2979	1	91	0.586537	1	0.755486	62	13	0.0601045	0.142824	0.554591	0.542628	1	0.710513
EXG2	5.79587	5.6547	-0.141171	0.691336	0.521737	0.679285	0.541909	0.214173	0.433851	0.4937	1	91	0.484075	1	0.668955	62	13	0.0862693	0.150299	0.588089	0.323767	1	0.509853
FCY21	7.37495	7.61105	0.236107	0.297602	0.268887	0.378417	0.408443	0.599089	0.147083	4.0731	1	91	0.0465156	1	0.145055	62	13	0.0480591	0.113282	0.734491	0.00833176	1	0.0394926
FET3	5.56341	5.93663	0.373219	0.672464	0.402921	0.67028	0.538994	1.49693	0.423178	3.5374	1	91	0.0631973	1	0.184911	62	13	0.0851257	0.14949	0.681141	0.0417026	1	0.126712
FET33	6.08225	6.21394	0.13169	0.705153	0.705243	0.695401	0.661431	0.186372	0.476006	0.3915	1	91	0.533078	1	0.713783	62	13	0.088316	0.183448	0.552109	0.561341	1	0.725002
FET35	7.43061	7.72177	0.291153	0.819832	0.43767	0.800169	0.567351	0.910993	0.587934	1.5495	1	91	0.216405	1	0.405017	62	13	0.101622	0.157355	0.692308	0.030584	1	0.102814
FET99	5.76749	5.83641	0.0689191	0.704276	0.629137	0.702232	0.636165	0.0510449	0.478595	0.1067	1	91	0.744683	1	0.848509	62	13	0.0891836	0.17644	0.508685	0.927511	1	0.95574
FGR2	6.50073	6.15009	-0.350641	0.684116	0.38002	0.68087	0.454027	1.32129	0.421265	3.1365	1	91	0.0799062	1	0.215202	62	13	0.0864706	0.125924	0.687345	0.0351646	1	0.111866
FGR28	6.28201	6.39798	0.115968	0.655505	0.531087	0.663392	0.568536	0.144528	0.42088	0.3434	1	91	0.559324	1	0.732374	62	13	0.0842509	0.157683	0.547146	0.599677	1	0.760019
FGR38	5.75956	5.46149	-0.298068	0.722349	0.68491	0.71985	0.630844	0.954783	0.498422	1.9156	1	91	0.169728	1	0.349633	62	13	0.091421	0.174965	0.60794	0.226015	1	0.416852
FLC1 (1) (IPF4012)	6.69908	6.30836	-0.390715	0.405179	0.57931	0.428818	0.581946	1.64057	0.209328	7.8373	1	91	0.00624884	1	0.0336585	62	13	0.05446	0.161403	0.71464	0.0157621	1	0.0627834
FLC1 (2) (IPF4012)	6.08345	6.54293	0.459481	0.478877	0.495023	0.502509	0.529342	2.26887	0.257066	8.826	1	91	0.00379791	1	0.0220218	62	13	0.0638187	0.146813	0.774194	0.00202728	0.960932	0.0133463
FRE10	7.84695	8.02471	0.177758	0.38536	0.555824	0.418743	0.633957	0.339572	0.212588	1.5973	1	91	0.209514	1	0.398959	62	13	0.0531804	0.175828	0.537221	0.679684	1	0.803418
FTR1	7.1719	7.33683	0.164937	0.355996	0.237875	0.401303	0.565445	0.292356	0.187129	1.5623	1	91	0.214534	1	0.404295	62	13	0.0509655	0.156826	0.638958	0.118619	1	0.272938
FTR2	6.01966	6.20389	0.184231	0.557901	0.440839	0.573404	0.51502	0.364752	0.318346	1.1458	1	91	0.287261	1	0.47776	62	13	0.0728223	0.142841	0.604218	0.242525	1	0.437098
GAP1	5.88452	5.6147	-0.269817	0.6583	0.697335	0.661407	0.648198	0.782373	0.434615	1.8002	1	91	0.183027	1	0.36299	62	13	0.0839987	0.179778	0.588089	0.323767	1	0.509853
GCA1 (1)	7.84451	8.21066	0.366153	0.474469	0.549027	0.493466	0.633016	1.44078	0.26935	5.3491	1	91	0.0229876	1	0.0923399	62	13	0.0626703	0.175567	0.688586	0.0339677	1	0.109529
GCA1 (2)	6.81297	6.78594	-0.0270334	0.511106	0.451089	0.539506	0.533969	0.00785374	0.29009	0.0271	1	91	0.869608	1	0.93046	62	13	0.0685174	0.148096	0.542184	0.639156	1	0.782842
GPH1 (1)	5.92077	5.60739	-0.313377	0.488175	0.341596	0.50928	0.471609	1.05538	0.253292	4.1666	1	91	0.0441246	1	0.141318	62	13	0.0646786	0.130801	0.693548	0.0295224	1	0.100673
GPH1 (2)	5.26544	5.72405	0.45861	0.505548	0.520359	0.524399	0.513715	2.26027	0.273171	8.2742	1	91	0.00500866	1	0.0282632	62	13	0.0665987	0.142479	0.729529	0.00981341	1	0.0447265
GPR1 (1)	6.3348	6.39255	0.0577521	0.678469	0.599909	0.672514	0.612422	0.0358434	0.439582	0.0815	1	91	0.775924	1	0.870225	62	13	0.0854093	0.169855	0.57196	0.420939	1	0.608308
GPR1 (2)	5.46929	5.66459	0.195294	0.332303	0.525737	0.374542	0.570433	0.409875	0.170711	2.401	1	91	0.124729	1	0.285611	62	13	0.0475669	0.15821	0.616625	0.190648	1	0.382913
GSC1 (1) (FKS1)	6.05024	5.82822	-0.22202	0.648669	0.455538	0.652115	0.52028	0.529735	0.399847	1.3248	1	91	0.252748	1	0.443713	62	13	0.0828187	0.1443	0.626551	0.155423	1	0.331849
GSC1 (2) (FKS1)	4.96542	5.94174	0.976315	0.525761	1.7391	0.53006	1.38562	10.2436	0.550384	18.6118	1	91	4.06148e-05	0.0192514	0.000458367	62	13	0.0673176	0.384302	0.630273	0.14357	1	0.315057
GSL2 (1)	7.19663	6.56676	-0.629868	0.393675	0.365926	0.445083	0.446091	4.26356	0.198247	21.5063	1	91	1.17608e-05	0.0055746	0.00015485	62	13	0.0565256	0.123723	0.888337	1.22061e-05	0.00578567	0.000214284
GSL2 (2)	6.48386	6.96134	0.477487	0.437628	0.357868	0.472277	0.390729	2.45017	0.211477	11.586	1	91	0.000989847	0.469188	0.00679982	62	13	0.0599793	0.108369	0.806452	0.000560353	0.265608	0.00465978
GSL2 (3)	5.82247	5.8604	0.0379292	0.394816	0.316174	0.427312	0.482913	0.0154604	0.190915	0.081	1	91	0.776593	1	0.870225	62	13	0.0542687	0.133936	0.537221	0.679684	1	0.803418
HEM13	6.48082	6.61776	0.136939	0.429209	0.417198	0.450705	0.579616	0.201525	0.224968	0.8958	1	91	0.346417	1	0.547339	62	13	0.0572396	0.160756	0.575682	0.397117	1	0.588229
HEX1	6.0969	5.96486	-0.132032	0.485145	0.595178	0.504086	0.649175	0.187341	0.281608	0.6653	1	91	0.416825	1	0.609799	62	13	0.064019	0.180049	0.590571	0.31023	1	0.496788
HGT1	6.94575	6.97234	0.0265842	0.47639	0.308822	0.501819	0.337894	0.00759486	0.229195	0.0331	1	91	0.856039	1	0.926399	62	13	0.0637311	0.0937149	0.511166	0.9053	1	0.941035
HGT10	6.71887	6.98268	0.263807	0.575884	0.446016	0.584589	0.467328	0.747904	0.321468	2.3265	1	91	0.130656	1	0.293511	62	13	0.0742429	0.129613	0.621588	0.172363	1	0.355219
HGT12	5.61578	5.57968	-0.0361025	0.709333	0.448874	0.708815	0.480247	0.0140071	0.457743	0.0306	1	91	0.861524	1	0.930211	62	13	0.0900196	0.133197	0.534739	0.700311	1	0.813596
HGT13	6.41899	6.02028	-0.398714	0.632119	0.482745	0.633368	0.541487	1.70843	0.38341	4.4559	1	91	0.0375233	1	0.125254	62	13	0.0804378	0.150181	0.692308	0.030584	1	0.102814
HGT14	6.58037	6.45044	-0.129926	0.427091	0.341277	0.471314	0.42084	0.181413	0.214735	0.8448	1	91	0.360457	1	0.562029	62	13	0.059857	0.11672	0.611663	0.210323	1	0.403616
HGT15	6.53292	6.32451	-0.208408	0.624606	0.375631	0.633226	0.48539	0.466768	0.373791	1.2487	1	91	0.266742	1	0.456519	62	13	0.0804198	0.134623	0.601737	0.253992	1	0.445897
HGT16	6.99349	6.34292	-0.65057	0.380241	0.559931	0.424997	0.599009	4.54843	0.209914	21.6681	1	91	1.09861e-05	0.00520742	0.000153084	62	13	0.0539746	0.166135	0.859801	5.07909e-05	0.0240749	0.000687854
HGT17	5.91652	5.87651	-0.0400149	0.619913	0.577332	0.62555	0.584769	0.0172074	0.383199	0.0449	1	91	0.832662	1	0.913615	62	13	0.0794449	0.162186	0.531017	0.731665	1	0.835685
HGT2	6.50591	6.44742	-0.0584892	0.614277	0.251321	0.613525	0.408871	0.0367642	0.342018	0.1075	1	91	0.743762	1	0.848509	62	13	0.0779177	0.1134	0.524814	0.784907	1	0.865223
HGT20	6.50598	6.75027	0.244285	0.52284	0.265624	0.540011	0.413401	0.641309	0.271769	2.3598	1	91	0.127968	1	0.288842	62	13	0.0685815	0.114657	0.645161	0.102979	1	0.258264
HGT3	6.62707	6.91369	0.286616	0.631514	0.370187	0.630764	0.496894	0.882827	0.373048	2.3665	1	91	0.127435	1	0.288842	62	13	0.0801071	0.137814	0.656328	0.0789949	1	0.211546
HGT6	6.16485	6.13394	-0.03091	0.616609	0.546708	0.612798	0.524842	0.0102677	0.359073	0.0286	1	91	0.866081	1	0.93046	62	13	0.0778254	0.145565	0.514888	0.872126	1	0.924805
HGT7	6.98092	7.48852	0.507596	0.995122	0.841337	0.958376	0.757152	2.76892	0.861738	3.2132	1	91	0.0763695	1	0.211691	62	13	0.121714	0.209996	0.662531	0.0677705	1	0.186763
HGT8	3.41772	3.66402	0.246302	0.29706	0.258751	0.320756	0.321204	0.651944	0.102932	6.3337	1	91	0.0135976	1	0.0602363	62	13	0.0407361	0.0890859	0.817618	0.000348785	0.165324	0.00324165
HGT9	5.72589	5.9545	0.228615	0.678244	0.542771	0.678599	0.621334	0.561672	0.44826	1.253	1	91	0.265926	1	0.456519	62	13	0.0861822	0.172327	0.604218	0.242525	1	0.437098
HIS1	6.32936	6.68581	0.35645	0.518166	0.3835	0.52991	0.478008	1.36543	0.272205	5.0162	1	91	0.0275471	1	0.102814	62	13	0.0672986	0.132576	0.689826	0.0328059	1	0.107241
HSP70 (SSA1)	5.65351	6.10846	0.454947	0.649921	0.951924	0.658246	0.82421	2.22431	0.473732	4.6953	1	91	0.0328573	1	0.11409	62	13	0.0835973	0.228595	0.621588	0.172363	1	0.355219
HSP90	6.5761	7.42346	0.847358	0.582619	1.58881	0.590418	1.29757	7.71627	0.56806	13.5835	1	91	0.000387416	0.183635	0.00306059	62	13	0.0749832	0.35988	0.620347	0.176807	1	0.362798
HST6 (1)	5.6984	5.75243	0.054026	0.673664	0.654782	0.674182	0.597408	0.0313675	0.438474	0.0715	1	91	0.78977	1	0.880826	62	13	0.0856212	0.165691	0.527295	0.763474	1	0.849499
HWP1	8.37189	9.0323	0.660412	1.28772	1.33483	1.24624	1.13559	4.68709	1.50979	3.1045	1	91	0.0814344	1	0.216853	62	13	0.158273	0.314957	0.640199	0.11535	1	0.272938
HYR1 (1.1)	7.15179	7.33974	0.187959	0.78822	0.728679	0.771975	0.787134	0.379665	0.59983	0.633	1	91	0.428327	1	0.620306	62	13	0.0980409	0.218312	0.583127	0.351977	1	0.54522
HYR1 (1.2)	7.14093	7.45133	0.3104	0.612926	0.603958	0.615219	0.746036	1.03542	0.407767	2.5392	1	91	0.114519	1	0.271409	62	13	0.0781329	0.206913	0.688586	0.0339677	1	0.109529
HYR1 (2)	6.35513	6.64053	0.28539	0.762893	0.708117	0.765832	0.697094	0.875289	0.569969	1.5357	1	91	0.218446	1	0.405017	62	13	0.0972608	0.193339	0.626551	0.155423	1	0.331849
HYR3 (1)	6.29406	7.0247	0.73064	0.969394	1.37544	0.934957	1.14513	5.73694	0.946012	6.0643	1	91	0.0156766	1	0.0680983	62	13	0.11874	0.317603	0.66129	0.0699038	1	0.191528
HYR3 (2)	7.34045	7.46121	0.120764	1.01258	1.40034	0.973321	1.14272	0.156729	1.00628	0.1558	1	91	0.693977	1	0.81221	62	13	0.123612	0.316934	0.51861	0.839176	1	0.897899
IFF3 (1)	5.97362	6.20372	0.230107	0.44042	0.419649	0.466526	0.504398	0.569028	0.223691	2.5438	1	91	0.114195	1	0.271409	62	13	0.0592488	0.139895	0.635236	0.128861	1	0.288113
IFF3 (2)	5.61308	5.5226	-0.0904751	0.610368	0.442789	0.619286	0.492343	0.0879695	0.360319	0.2441	1	91	0.622451	1	0.774388	62	13	0.0786494	0.136551	0.529777	0.74222	1	0.837648
IFF4 (1)	6.23069	5.66035	-0.570339	0.442091	0.363468	0.458899	0.470401	3.49575	0.212345	16.4626	1	91	0.000104699	0.0496272	0.00105679	62	13	0.0582802	0.130466	0.847395	9.15374e-05	0.0433887	0.00108472
IFF4 (2)	7.33887	7.10959	-0.229277	0.630008	0.618453	0.647474	0.623938	0.564931	0.414304	1.3636	1	91	0.245965	1	0.435028	62	13	0.0822293	0.173049	0.565757	0.462455	1	0.646618
IFF5 (1)	6.44725	6.62101	0.173759	0.92857	0.958198	0.892634	0.866677	0.324464	0.789288	0.4111	1	91	0.523023	1	0.704298	62	13	0.113365	0.240373	0.576923	0.38936	1	0.58404
IFF5 (2)	5.74501	5.48603	-0.258977	0.678155	0.371607	0.682502	0.451916	0.720767	0.42281	1.7047	1	91	0.194966	1	0.377199	62	13	0.0866779	0.125339	0.612903	0.205272	1	0.397138
IFF6 (1)	6.94283	7.32975	0.386919	0.538438	0.3857	0.545253	0.547888	1.60885	0.297774	5.4029	1	91	0.022329	1	0.090461	62	13	0.0692472	0.151957	0.698511	0.0255868	1	0.0911892
IFF7 (1)	5.24648	5.60168	0.3552	0.454917	0.872183	0.475902	0.765842	1.35588	0.285666	4.7464	1	91	0.0319437	1	0.112995	62	13	0.0604396	0.212406	0.610422	0.215464	1	0.408519
IFF7 (2)	5.1644	5.15401	-0.0103851	0.50958	0.68664	0.525031	0.615885	0.00115903	0.292697	0.004	1	91	0.94971	1	0.967924	62	13	0.066679	0.170816	0.548387	0.589983	1	0.753778
IFF8	5.96415	6.60654	0.642387	0.841502	0.744657	0.821561	0.796579	4.43473	0.668318	6.6357	1	91	0.0116064	1	0.0539355	62	13	0.104338	0.220931	0.740695	0.00676282	1	0.0337429
INT1 (1)	9.07172	9.32057	0.248849	0.963835	0.934431	0.964732	0.84543	0.665496	0.895209	0.7434	1	91	0.39084	1	0.587739	62	13	0.122521	0.23448	0.564516	0.471024	1	0.650919
INT1 (2)	8.15472	7.12894	-1.02577	1.07098	0.633819	1.06208	0.596458	11.3078	1.00106	11.2958	1	91	0.00113698	0.538926	0.00759051	62	13	0.134884	0.165428	0.75062	0.00479826	1	0.0264462
INT1 (3)	6.04877	5.47232	-0.57645	0.550296	0.468152	0.569252	0.49363	3.57105	0.310835	11.4886	1	91	0.0010369	0.491492	0.00702131	62	13	0.072295	0.136908	0.796526	0.000843409	0.399776	0.006448
JEN1	6.65299	6.62692	-0.0260743	0.37098	0.374816	0.402485	0.540148	0.00730631	0.183325	0.0399	1	91	0.842122	1	0.917835	62	13	0.0511156	0.14981	0.523573	0.795687	1	0.867024
KOG1 (1) (IPF4893)	6.01162	6.06842	0.0567964	0.429815	0.25634	0.450804	0.451475	0.0346669	0.203324	0.1705	1	91	0.680639	1	0.798572	62	13	0.0572521	0.125217	0.53598	0.689969	1	0.811527
KOG1 (2) (IPF4893)	6.17219	5.9225	-0.249685	0.472922	0.467681	0.487855	0.487078	0.669973	0.237878	2.8165	1	91	0.0967309	1	0.243885	62	13	0.0619577	0.135091	0.637717	0.121959	1	0.279269
KRE6	6.78511	6.91473	0.129622	0.661955	0.522662	0.660308	0.570479	0.180564	0.417832	0.4321	1	91	0.51262	1	0.696223	62	13	0.0838592	0.158222	0.591811	0.303604	1	0.491155
KRE9	6.05887	6.20354	0.14467	0.571251	0.766432	0.58255	0.691013	0.22492	0.362071	0.6212	1	91	0.43265	1	0.620306	62	13	0.0739839	0.191653	0.544665	0.619279	1	0.774508
LEU2	5.86646	5.65719	-0.209269	0.546045	0.39072	0.565126	0.493253	0.470636	0.306863	1.5337	1	91	0.218743	1	0.405017	62	13	0.071771	0.136804	0.60794	0.226015	1	0.416852
LIP1	6.20439	6.00798	-0.196413	0.489835	0.586033	0.496538	0.603276	0.414584	0.265847	1.5595	1	91	0.214941	1	0.404295	62	13	0.0630604	0.167319	0.581886	0.359266	1	0.551107
LIP10	6.04949	5.98229	-0.0672032	0.628349	0.43584	0.635654	0.508209	0.0485348	0.380092	0.1277	1	91	0.721656	1	0.832275	62	13	0.0807282	0.140952	0.534739	0.700311	1	0.813596
LIP2	5.79962	5.58912	-0.210494	0.53992	0.40256	0.547619	0.454496	0.476159	0.284547	1.6734	1	91	0.199078	1	0.383589	62	13	0.0695477	0.126055	0.615385	0.195435	1	0.384383
LIP3	6.3555	6.11165	-0.243849	0.809993	0.681284	0.802118	0.656113	0.63902	0.608394	1.0503	1	91	0.308155	1	0.506943	62	13	0.101869	0.181973	0.591811	0.303604	1	0.491155
LIP4	6.61461	6.07815	-0.536461	0.539373	0.806974	0.557686	0.74312	3.09278	0.350665	8.8198	1	91	0.00380968	1	0.0220218	62	13	0.0708262	0.206104	0.703474	0.0221136	1	0.0818894
LIP5	6.57586	6.6741	0.0982433	0.79505	0.460299	0.777466	0.519033	0.103724	0.549375	0.1888	1	91	0.664946	1	0.791621	62	13	0.0987383	0.143954	0.599256	0.265831	1	0.454888
LIP6	6.20537	6.33633	0.130965	0.394889	0.265708	0.418542	0.431292	0.184325	0.176959	1.0416	1	91	0.310155	1	0.506943	62	13	0.0531549	0.119619	0.58933	0.316951	1	0.504144
LIP7	6.08489	5.96661	-0.118283	0.391555	0.369862	0.430473	0.54179	0.150354	0.203098	0.7403	1	91	0.391826	1	0.587739	62	13	0.0546702	0.150266	0.586849	0.330678	1	0.517298
LIP8	6.14743	6.06162	-0.0858043	0.471079	0.349101	0.499704	0.477889	0.079121	0.246198	0.3214	1	91	0.572163	1	0.74507	62	13	0.0634624	0.132543	0.575682	0.397117	1	0.588229
LPD1	5.84544	5.66352	-0.181926	0.552506	0.240089	0.557394	0.443305	0.355685	0.29192	1.2184	1	91	0.272585	1	0.461448	62	13	0.0707891	0.122951	0.609181	0.220694	1	0.416769
MDR1 (BMR1)	6.39244	6.2636	-0.128838	1.03068	0.649929	0.986035	0.594284	0.178388	0.870496	0.2049	1	91	0.651872	1	0.790249	62	13	0.125227	0.164825	0.503722	0.972087	1	0.98455
MEP3	6.53511	6.73377	0.198659	0.582504	0.430706	0.597303	0.515403	0.424121	0.341791	1.2409	1	91	0.268231	1	0.456519	62	13	0.0758576	0.142947	0.615385	0.195435	1	0.384383
MID1	5.48474	5.32829	-0.156456	0.535771	0.51055	0.542999	0.528759	0.263061	0.29234	0.8998	1	91	0.345348	1	0.547339	62	13	0.068961	0.146651	0.573201	0.412907	1	0.605937
MNN9	6.89024	7.31668	0.426436	0.473972	1.01467	0.491408	0.858948	1.95426	0.323067	6.0491	1	91	0.0158034	1	0.0680983	62	13	0.0624088	0.238229	0.60794	0.226015	1	0.416852
MNT1	6.52438	6.76873	0.244359	0.619096	0.513095	0.617286	0.517935	0.641696	0.362502	1.7702	1	91	0.186682	1	0.367167	62	13	0.0783954	0.143649	0.599256	0.265831	1	0.454888
MNT2	6.72073	6.46686	-0.25387	1.223	0.947903	1.16949	0.807646	0.692623	1.2501	0.5541	1	91	0.458565	1	0.645099	62	13	0.148525	0.224001	0.544665	0.619279	1	0.774508
MPD1	6.54911	6.48775	-0.0613586	0.602794	0.497759	0.613977	0.580398	0.0404599	0.370375	0.1092	1	91	0.741816	1	0.848509	62	13	0.0779752	0.160974	0.560794	0.497249	1	0.673417
MSB2	5.68106	5.45805	-0.223011	0.876494	0.418413	0.854899	0.497324	0.534474	0.65137	0.8205	1	91	0.367426	1	0.565455	62	13	0.108572	0.137933	0.562035	0.488421	1	0.669109
MSS4	6.68597	7.09785	0.411881	0.729022	0.400367	0.711069	0.516972	1.82313	0.466437	3.9086	1	91	0.0510664	1	0.155163	62	13	0.0903059	0.143382	0.741935	0.00648293	1	0.0326905
NIK1 (1)	7.30403	5.71531	-1.58872	0.924764	0.637666	0.907644	0.624079	27.1248	0.752419	36.0501	1	91	3.88318e-08	1.84063e-05	1.15035e-06	62	13	0.115271	0.173088	0.945409	5.22913e-07	0.000247861	2.47861e-05
NIK1 (2)	5.78141	6.72902	0.947612	0.683141	1.05545	0.680872	0.892484	9.65017	0.518317	18.6183	1	91	4.05001e-05	0.019197	0.000458367	62	13	0.0864708	0.24753	0.76799	0.00255944	1	0.0163943
PCT1	6.09658	5.78906	-0.307515	0.614706	0.512305	0.61436	0.548822	1.01626	0.364907	2.785	1	91	0.0985879	1	0.245951	62	13	0.0780239	0.152216	0.64268	0.109026	1	0.268487
PDC11	6.11147	6.27236	0.160887	0.490231	0.262854	0.506063	0.394025	0.278173	0.239523	1.1614	1	91	0.284024	1	0.474349	62	13	0.0642701	0.109283	0.593052	0.297073	1	0.48724
PGA12	6.45274	6.12912	-0.323626	0.46068	0.301423	0.477686	0.41815	1.12554	0.219416	5.1297	1	91	0.0258935	1	0.100603	62	13	0.0606661	0.115974	0.738213	0.00735539	1	0.0359428
PGA13	9.30166	9.54459	0.242931	0.444208	0.37339	0.515092	0.579197	0.634221	0.276851	2.2908	1	91	0.133608	1	0.297326	62	13	0.0654168	0.16064	0.669975	0.0560678	1	0.161067
PGA18	6.36151	6.05767	-0.303839	0.57613	0.596228	0.598001	0.589831	0.992114	0.35601	2.7868	1	91	0.0984807	1	0.245951	62	13	0.0759462	0.16359	0.662531	0.0677705	1	0.186763
PGA21	6.27931	6.50421	0.224901	0.574742	0.716954	0.586621	0.709078	0.543573	0.370207	1.4683	1	91	0.228751	1	0.417031	62	13	0.074501	0.196663	0.588089	0.323767	1	0.509853
PGA27	6.47362	6.30354	-0.170075	0.462114	0.586389	0.472177	0.590433	0.310855	0.243608	1.276	1	91	0.261613	1	0.455899	62	13	0.0599666	0.163757	0.612903	0.205272	1	0.397138
PGA29	5.79369	5.78468	-0.00901329	0.527403	0.457403	0.540974	0.519889	0.000873052	0.288976	0.003	1	91	0.95644	1	0.968702	62	13	0.0687037	0.144191	0.523573	0.795687	1	0.867024
PGA3	6.43536	6.04553	-0.389822	0.670825	0.327206	0.664109	0.475564	1.63307	0.405718	4.0251	1	91	0.0477967	1	0.147115	62	13	0.0843419	0.131898	0.694789	0.0284926	1	0.0985802
PGA30	6.34307	6.27565	-0.0674213	0.696755	0.708053	0.697766	0.642124	0.0488503	0.474622	0.1029	1	91	0.749112	1	0.849472	62	13	0.0886164	0.178093	0.544665	0.619279	1	0.774508
PGA31	7.01476	6.55347	-0.461292	1.0176	0.727452	0.976625	0.65228	2.28678	0.866948	2.6377	1	91	0.107814	1	0.26207	62	13	0.124032	0.18091	0.624069	0.163728	1	0.343394
PGA32	7.19284	6.73213	-0.460717	0.737707	0.382657	0.724567	0.476993	2.28108	0.476097	4.7912	1	91	0.0311649	1	0.111947	62	13	0.0920201	0.132294	0.722084	0.012477	1	0.054258
PGA36	5.34296	5.80707	0.464112	0.986129	1.75424	0.95531	1.38171	2.31483	1.07642	2.1505	1	91	0.145971	1	0.311236	62	13	0.121324	0.383216	0.51861	0.839176	1	0.897899
PGA38	6.27042	5.98733	-0.283083	0.558037	0.466164	0.569051	0.501323	0.861196	0.311902	2.7611	1	91	0.100023	1	0.248225	62	13	0.0722695	0.139042	0.635236	0.128861	1	0.288113
PGA39	6.78429	6.71319	-0.0710958	0.58231	0.582262	0.593949	0.6118	0.0543202	0.356314	0.1525	1	91	0.69707	1	0.812474	62	13	0.0754316	0.169683	0.554591	0.542628	1	0.710513
PGA4	6.44505	6.9643	0.519243	0.583834	0.448889	0.588366	0.424167	2.89745	0.318844	9.0873	1	91	0.00333479	1	0.0202653	62	13	0.0747225	0.117643	0.774194	0.00202728	0.960932	0.0133463
PGA40 (1)	6.71333	6.5104	-0.202938	0.495527	0.74908	0.515465	0.734671	0.442587	0.310751	1.4242	1	91	0.235815	1	0.423055	62	13	0.0654641	0.203761	0.544665	0.619279	1	0.774508
PGA40 (2)	5.34595	5.38396	0.038008	0.776374	0.678553	0.76681	0.618272	0.0155247	0.554178	0.028	1	91	0.86748	1	0.93046	62	13	0.097385	0.171478	0.532258	0.721161	1	0.829685
PGA44	3.4309	3.68308	0.252182	0.354229	0.260372	0.370893	0.331052	0.683441	0.132964	5.14	1	91	0.0257488	1	0.100603	62	13	0.0471034	0.0918174	0.827543	0.000225978	0.107114	0.00218599
PGA45	6.27795	6.48628	0.208325	0.658212	0.77335	0.658897	0.714572	0.466396	0.446716	1.0441	1	91	0.309579	1	0.506943	62	13	0.0836801	0.198187	0.563275	0.47968	1	0.659038
PGA46	6.64002	6.59197	-0.0480546	0.650864	0.479854	0.641718	0.616561	0.0248167	0.406598	0.061	1	91	0.805479	1	0.894138	62	13	0.0814982	0.171003	0.558313	0.515155	1	0.68784
PGA47	5.80773	5.6669	-0.140838	0.699958	0.67889	0.688104	0.653963	0.213163	0.465955	0.4575	1	91	0.50051	1	0.683694	62	13	0.0873893	0.181377	0.564516	0.471024	1	0.650919
PGA49 (1)	6.55232	7.07373	0.521406	1.20353	1.30658	1.14864	1.08326	2.92164	1.29539	2.2554	1	91	0.136611	1	0.302587	62	13	0.145878	0.300442	0.615385	0.195435	1	0.384383
PGA49 (2)	6.3529	6.33711	-0.0157954	0.852215	0.562293	0.842463	0.5752	0.00268125	0.647461	0.0041	1	91	0.949086	1	0.967924	62	13	0.106993	0.159532	0.538462	0.669459	1	0.801323
PGA5	5.91187	5.70242	-0.209444	0.612135	0.4601	0.621145	0.54746	0.47142	0.371666	1.2684	1	91	0.263028	1	0.456519	62	13	0.0788855	0.151838	0.604218	0.242525	1	0.437098
PGA50	5.13285	5.10299	-0.0298601	0.674586	0.456539	0.662992	0.474062	0.00958197	0.404245	0.0237	1	91	0.877992	1	0.935481	62	13	0.0842	0.131481	0.503722	0.972087	1	0.98455
PGA51	7.00351	6.20943	-0.794084	0.491719	0.654241	0.51172	0.64295	6.77651	0.286766	23.6308	1	91	4.85134e-06	0.00229954	7.66512e-05	62	13	0.0649885	0.178322	0.851117	7.6861e-05	0.0364321	0.000934157
PGA52	5.70949	5.3729	-0.336594	0.624219	0.298778	0.630663	0.424686	1.21755	0.362003	3.3634	1	91	0.0699287	1	0.19848	62	13	0.0800943	0.117787	0.686104	0.0363972	1	0.114254
PGA53	5.67806	6.19437	0.516304	0.743826	0.457382	0.740633	0.513167	2.86474	0.501656	5.7106	1	91	0.0189255	1	0.078006	62	13	0.0940605	0.142327	0.709677	0.0183542	1	0.0713107
PGA54	6.14842	6.55936	0.410943	0.690067	0.523309	0.686587	0.545549	1.81484	0.442835	4.0982	1	91	0.0458604	1	0.143959	62	13	0.0871966	0.151308	0.689826	0.0328059	1	0.107241
PGA55 (2)	5.74542	5.46735	-0.278068	0.616801	0.44192	0.630563	0.484441	0.830952	0.370828	2.2408	1	91	0.137872	1	0.302838	62	13	0.0800816	0.13436	0.638958	0.118619	1	0.272938
PGA60	7.72097	7.65592	-0.0650508	0.984991	0.556976	0.947926	0.534472	0.0454757	0.797813	0.057	1	91	0.811839	1	0.898794	62	13	0.120387	0.148236	0.537221	0.679684	1	0.803418
PGA9	7.1198	7.03194	-0.087856	0.641411	0.616956	0.644465	0.712447	0.08295	0.430499	0.1927	1	91	0.661719	1	0.791621	62	13	0.0818471	0.197597	0.522333	0.806505	1	0.870805
PGK1	6.6733	5.99753	-0.675764	0.540318	0.574623	0.543268	0.596622	4.90754	0.305137	16.0831	1	91	0.000124069	0.0588087	0.00122518	62	13	0.0689951	0.165473	0.815136	0.00038804	0.183931	0.00340613
PHO11	5.43588	5.52619	0.0903125	0.588111	0.481694	0.587693	0.514572	0.0876536	0.332134	0.2639	1	91	0.608698	1	0.762038	62	13	0.0746371	0.142716	0.527295	0.763474	1	0.849499
PHR1	6.48381	6.45765	-0.0261552	0.776793	0.860699	0.75684	0.737833	0.00735175	0.568137	0.0129	1	91	0.909822	1	0.949805	62	13	0.0961188	0.204638	0.501241	0.994416	1	1
PHR2	5.29458	5.38868	0.0941016	0.609399	0.454561	0.614763	0.48916	0.0951629	0.355141	0.268	1	91	0.605933	1	0.762038	62	13	0.078075	0.135669	0.576923	0.38936	1	0.58404
PHR3	6.20132	6.18537	-0.015954	0.506766	0.288391	0.511736	0.423952	0.00273535	0.248371	0.011	1	91	0.916701	1	0.950802	62	13	0.0649905	0.117583	0.542184	0.639156	1	0.782842
PIL1	6.60806	6.63115	0.0230884	0.891916	0.502467	0.871257	0.567402	0.00572877	0.68723	0.0083	1	91	0.92761	1	0.957924	62	13	0.11065	0.157369	0.512407	0.89422	1	0.935674
PIR32 (IPF7274)	5.86003	5.93896	0.0789344	0.633954	0.484772	0.636656	0.57262	0.0669586	0.392602	0.1706	1	91	0.680551	1	0.798572	62	13	0.0808554	0.158816	0.559553	0.50616	1	0.67774
PLB1	5.32557	5.40716	0.0815972	0.622047	0.630627	0.630057	0.589184	0.0715524	0.38878	0.184	1	91	0.668972	1	0.792732	62	13	0.0800173	0.16341	0.538462	0.669459	1	0.801323
PLB3 (1.1)	6.46556	6.54645	0.080885	0.382774	0.875629	0.408229	0.746906	0.0703088	0.230961	0.3044	1	91	0.582489	1	0.752316	62	13	0.0518452	0.207154	0.57072	0.429063	1	0.610738
PLB3 (1.2)	5.214	6.11879	0.904791	0.666868	0.4832	0.661757	0.501599	8.79772	0.407294	21.6004	1	91	1.13037e-05	0.00535794	0.000153084	62	13	0.0840432	0.139119	0.858561	5.39178e-05	0.025557	0.000709918
PLB4	5.33505	5.2447	-0.0903539	0.64615	0.486567	0.654193	0.518795	0.087734	0.40186	0.2183	1	91	0.641455	1	0.783633	62	13	0.0830825	0.143888	0.522333	0.806505	1	0.870805
PLB5	5.78233	6.06032	0.277985	0.574694	1.59863	0.586057	1.27228	0.830455	0.553092	1.5015	1	91	0.223603	1	0.409219	62	13	0.0744293	0.352868	0.575682	0.397117	1	0.588229
PMA1 (1)	7.08941	6.80741	-0.281996	0.52135	0.508743	0.53868	0.554478	0.854592	0.293015	2.9165	1	91	0.0910874	1	0.234649	62	13	0.0684124	0.153784	0.653846	0.0838887	1	0.220907
PMA1 (2)	5.66447	6.00911	0.344645	0.747116	0.97522	0.741407	0.847589	1.27649	0.57742	2.2107	1	91	0.140513	1	0.306927	62	13	0.0941588	0.235079	0.595533	0.284293	1	0.476166
PPS1 (1)	6.31082	6.19532	-0.115495	0.523737	0.311992	0.532967	0.432601	0.14335	0.268123	0.5346	1	91	0.466558	1	0.654285	62	13	0.0676868	0.119982	0.560794	0.497249	1	0.673417
PPS1 (2)	6.86906	6.55913	-0.30993	0.752762	0.426657	0.722981	0.489982	1.03229	0.476243	2.1676	1	91	0.144396	1	0.311108	62	13	0.0918186	0.135897	0.652605	0.0864261	1	0.226331
PRA1	5.84648	5.80983	-0.0366527	0.500261	0.530575	0.515691	0.569745	0.0144373	0.275582	0.0524	1	91	0.819452	1	0.903303	62	13	0.0654928	0.158019	0.523573	0.795687	1	0.867024
PRY2	6.05346	5.87586	-0.177596	0.693194	0.579163	0.689166	0.584685	0.338954	0.453071	0.7481	1	91	0.389353	1	0.587739	62	13	0.0875242	0.162163	0.581886	0.359266	1	0.551107
RAD50 (1) (IPF11620)	6.80178	7.4296	0.627823	0.748431	0.827158	0.745859	0.842102	4.23592	0.581428	7.2854	1	91	0.00828736	1	0.040497	62	13	0.0947242	0.233557	0.71464	0.0157621	1	0.0627834
RAS1	7.37251	6.60101	-0.771496	0.79568	0.87411	0.776811	0.806487	6.39647	0.611159	10.4661	1	91	0.0016956	0.803713	0.0107162	62	13	0.0986551	0.223679	0.739454	0.00705352	1	0.0348268
RAS2	6.31004	6.31256	0.00251769	0.499087	0.485394	0.514394	0.527109	6.81204e-05	0.266778	0.0003	1	91	0.986219	1	0.990398	62	13	0.0653281	0.146194	0.524814	0.784907	1	0.865223
RAX2 (2) (IPF15377)	6.11725	5.93194	-0.18531	0.480019	0.39047	0.50369	0.508743	0.369037	0.254545	1.4498	1	91	0.231683	1	0.420757	62	13	0.0639687	0.1411	0.60794	0.226015	1	0.416852
RBT1	7.09993	7.2229	0.122963	0.858978	0.437519	0.835807	0.516253	0.16249	0.62755	0.2589	1	91	0.612108	1	0.763525	62	13	0.106148	0.143183	0.565757	0.462455	1	0.646618
RBT5	8.14935	9.81176	1.66241	1.17333	0.795077	1.14611	0.79448	29.6995	1.20139	24.7208	1	91	3.10302e-06	0.00147083	5.44753e-05	62	13	0.145556	0.220349	0.878412	2.02693e-05	0.00960765	0.000309924
RHR2	6.11404	5.52362	-0.590428	0.534411	0.341923	0.543082	0.450717	3.74634	0.279849	13.387	1	91	0.000424373	0.201153	0.00329758	62	13	0.0689715	0.125006	0.827543	0.000225978	0.107114	0.00218599
RSR1	6.50119	6.23844	-0.262744	0.974068	0.44191	0.935688	0.4898	0.74189	0.771028	0.9622	1	91	0.329234	1	0.532907	62	13	0.118832	0.135846	0.538462	0.669459	1	0.801323
RTA3 (YOR49)	5.98967	6.077	0.0873336	0.520853	0.494872	0.53636	0.579738	0.0819664	0.29564	0.2773	1	91	0.599758	1	0.762038	62	13	0.0681177	0.16079	0.564516	0.471024	1	0.650919
SAM2	6.20419	6.22662	0.0224296	0.594861	0.534398	0.589363	0.560349	0.00540651	0.341865	0.0158	1	91	0.900248	1	0.946159	62	13	0.0748492	0.155413	0.544665	0.619279	1	0.774508
SAP1	6.07599	5.91323	-0.162764	0.550665	0.233155	0.561003	0.398905	0.284701	0.289146	0.9846	1	91	0.323697	1	0.527259	62	13	0.0712474	0.110636	0.595533	0.284293	1	0.476166
SAP10	5.70894	5.81276	0.103825	0.497883	0.445092	0.521584	0.529111	0.115846	0.27335	0.4238	1	91	0.516687	1	0.699742	62	13	0.0662412	0.146749	0.566998	0.453973	1	0.638526
SAP2	5.31693	5.00907	-0.307863	0.433866	0.535303	0.476395	0.512601	1.01857	0.232839	4.3746	1	91	0.0392646	1	0.13015	62	13	0.0605023	0.14217	0.686104	0.0363972	1	0.114254
SAP3	7.40088	7.67726	0.276384	0.443688	0.633226	0.486938	0.614637	0.820917	0.260232	3.1546	1	91	0.0790557	1	0.215202	62	13	0.0618411	0.170469	0.612903	0.205272	1	0.397138
SAP30 (IPF1183)	4.95	5.05146	0.101465	0.388868	0.276777	0.413358	0.396609	0.110639	0.168635	0.6561	1	91	0.420053	1	0.612632	62	13	0.0524965	0.109999	0.638958	0.118619	1	0.272938
SAP4	5.65529	5.28375	-0.371535	0.93546	0.605146	0.909308	0.589493	1.48345	0.748046	1.9831	1	91	0.162472	1	0.339258	62	13	0.115482	0.163496	0.598015	0.271891	1	0.461923
SAP5	5.41117	5.27852	-0.132651	0.638313	0.420311	0.637645	0.499178	0.1891	0.380715	0.4967	1	91	0.482754	1	0.668955	62	13	0.080981	0.138447	0.534739	0.700311	1	0.813596
SAP6	6.26827	6.10972	-0.15854	0.416085	0.492191	0.450445	0.543577	0.270117	0.218118	1.2384	1	91	0.268711	1	0.456519	62	13	0.0572065	0.150761	0.57196	0.420939	1	0.608308
SAP7	6.15661	6.28686	0.130256	0.566355	0.517481	0.571944	0.534093	0.182335	0.320239	0.5694	1	91	0.452446	1	0.642094	62	13	0.072637	0.148131	0.57072	0.429063	1	0.610738
SAP8	6.43458	6.37362	-0.0609603	0.677433	0.50809	0.671186	0.568302	0.0399363	0.429528	0.093	1	91	0.761094	1	0.858949	62	13	0.0852407	0.157619	0.534739	0.700311	1	0.813596
SAP9	5.08793	5.23843	0.150499	0.662487	0.392708	0.649369	0.454369	0.243412	0.3863	0.6301	1	91	0.429384	1	0.620306	62	13	0.0824699	0.126019	0.601737	0.253992	1	0.445897
SAP99	5.64696	5.36437	-0.282596	0.504942	0.269349	0.540462	0.418926	0.858236	0.272932	3.1445	1	91	0.079529	1	0.215202	62	13	0.0686388	0.116189	0.71464	0.0157621	1	0.0627834
SAP99 (IPF11977)	5.67641	5.81512	0.138714	0.512457	0.435831	0.543576	0.527056	0.206783	0.292567	0.7068	1	91	0.402712	1	0.594659	62	13	0.0690342	0.146179	0.584367	0.344783	1	0.535827
SCW11	6.45736	6.56495	0.107587	0.479662	0.569236	0.493481	0.571885	0.124392	0.257255	0.4835	1	91	0.488613	1	0.672979	62	13	0.0626722	0.158612	0.593052	0.297073	1	0.48724
SCW4	7.17208	7.57106	0.398985	0.550113	0.487109	0.563638	0.516175	1.71075	0.309263	5.5317	1	91	0.0208318	1	0.0851231	62	13	0.0715821	0.143161	0.694789	0.0284926	1	0.0985802
SDH2	6.82352	6.54112	-0.2824	0.48709	0.31377	0.514021	0.426585	0.857046	0.250698	3.4186	1	91	0.0677125	1	0.193348	62	13	0.0652808	0.118313	0.702233	0.0229411	1	0.0836466
SGA1 (IPF8402)	6.0944	6.70161	0.607214	0.794235	0.817433	0.776594	0.750761	3.96239	0.596613	6.6415	1	91	0.0115713	1	0.0539355	62	13	0.0986276	0.208224	0.700993	0.0237953	1	0.086099
SIT1	6.13417	6.72363	0.589458	0.933423	1.17448	0.901723	0.981043	3.73404	0.837653	4.4577	1	91	0.0374857	1	0.125254	62	13	0.114519	0.272092	0.647643	0.0972018	1	0.246383
SLK19	8.34755	8.34208	-0.00547542	1.23471	1.12534	1.20467	0.995555	0.000322187	1.37559	0.0002	1	91	0.988748	1	0.990838	62	13	0.152993	0.276117	0.503722	0.972087	1	0.98455
SLN1 (1)	7.71775	6.41333	-1.30442	0.936677	0.729477	0.905314	0.671618	18.2857	0.759014	24.0913	1	91	4.01428e-06	0.00190277	6.79561e-05	62	13	0.114975	0.186273	0.885856	1.38717e-05	0.0065752	0.000226731
SLN1 (2)	6.65391	7.39984	0.745934	0.52516	1.30709	0.533784	1.10135	5.97963	0.437482	13.6683	1	91	0.000372507	0.176568	0.00299268	62	13	0.0677906	0.30546	0.638958	0.118619	1	0.272938
SLN1 (2)	5.45889	6.33227	0.873378	0.572105	0.425946	0.575152	0.495064	8.19745	0.316711	25.8831	1	91	1.9371e-06	0.000918184	3.67273e-05	62	13	0.0730444	0.137306	0.887097	1.30135e-05	0.00616839	0.0002203
SMF12	5.66867	6.05752	0.388851	0.55707	0.524083	0.581745	0.555624	1.62495	0.333544	4.8718	1	91	0.0298142	1	0.108707	62	13	0.0738817	0.154103	0.676179	0.0476484	1	0.142046
SNF3	5.5882	5.6301	0.041896	0.96843	0.68814	0.936026	0.632659	0.0188634	0.797916	0.0236	1	91	0.878247	1	0.935481	62	13	0.118875	0.175468	0.529777	0.74222	1	0.837648
SNQ2 (1)	6.83912	6.10282	-0.736301	0.275999	0.301328	0.332625	0.470163	5.8262	0.12879	45.238	1	91	1.50485e-09	7.13299e-07	5.48692e-08	62	13	0.0422435	0.1304	0.971464	1.08647e-07	5.14987e-05	1.5007e-05
SNQ2 (2)	6.36584	6.29913	-0.0667118	0.274438	0.386452	0.362188	0.477868	0.0478276	0.147154	0.325	1	91	0.570023	1	0.744328	62	13	0.0459979	0.132537	0.540943	0.649193	1	0.787002
SNQ2 (3)	5.87295	6.54865	0.6757	0.3577	0.393801	0.414809	0.443899	4.90661	0.176173	27.8512	1	91	8.82874e-07	0.000418482	1.81949e-05	62	13	0.0526808	0.123115	0.895782	8.27846e-06	0.00392399	0.000170608
SPR1	5.9752	6.26558	0.290376	0.634022	0.460357	0.630597	0.481204	0.906139	0.37035	2.4467	1	91	0.121243	1	0.280415	62	13	0.0800859	0.133462	0.636476	0.125373	1	0.285706
SRB1	5.9045	6.16911	0.264607	0.610334	0.612615	0.62047	0.58125	0.752448	0.377236	1.9946	1	91	0.161271	1	0.338744	62	13	0.0787998	0.16121	0.619107	0.181335	1	0.368896
SSA2	5.86359	5.97585	0.112264	0.706081	0.901551	0.702111	0.791622	0.135442	0.514939	0.263	1	91	0.609309	1	0.762038	62	13	0.0891682	0.219557	0.549628	0.580361	1	0.745504
SSB1	6.77932	6.68532	-0.0939998	0.70394	0.653651	0.705722	0.635371	0.0949572	0.482535	0.1968	1	91	0.658369	1	0.791621	62	13	0.0896268	0.17622	0.5	1	1	1
SSU1	6.51822	6.92343	0.405212	0.490004	0.274032	0.503214	0.426364	1.76456	0.241481	7.3073	1	91	0.00819451	1	0.0404604	62	13	0.0639082	0.118252	0.775434	0.00193388	0.916661	0.0130952
SSY1 (1)	4.71402	5.49692	0.782907	0.67247	0.683754	0.65403	0.62119	6.5871	0.420871	15.6511	1	91	0.000150662	0.0714139	0.00145743	62	13	0.0830619	0.172287	0.795285	0.000886902	0.420391	0.00656862
SSY1 (2)	7.12245	7.38749	0.265036	0.335295	0.314857	0.389611	0.565035	0.75489	0.179326	4.2096	1	91	0.0430695	1	0.138877	62	13	0.0494807	0.156712	0.724566	0.0115255	1	0.050584
STE2	6.49815	5.98407	-0.514087	0.638646	0.431437	0.641007	0.511196	2.84019	0.386303	7.3522	1	91	0.00800751	1	0.0399533	62	13	0.081408	0.14178	0.743176	0.00621351	1	0.0323649
STE4	5.34612	5.4144	0.068287	0.722134	0.55771	0.715543	0.568215	0.050113	0.480911	0.1042	1	91	0.747587	1	0.849472	62	13	0.090874	0.157595	0.540943	0.649193	1	0.787002
SUL2 (1)	7.21503	6.6003	-0.614735	0.601684	1.43985	0.610476	1.1984	4.06115	0.547501	7.4176	1	91	0.00774306	1	0.039107	62	13	0.0775306	0.332377	0.888337	1.22061e-05	0.00578567	0.000214284
SUL2 (2)	6.58544	6.93481	0.349372	0.4109	0.807789	0.456454	0.687806	1.31175	0.251867	5.2081	1	91	0.0248129	1	0.0980109	62	13	0.0579697	0.190763	0.600496	0.259865	1	0.452853
SUN41	5.50317	5.98732	0.484148	0.650142	0.73374	0.648559	0.670297	2.51901	0.425341	5.9223	1	91	0.0169042	1	0.0721857	62	13	0.082367	0.185907	0.720844	0.0129784	1	0.0554214
SUN42	6.06379	5.98338	-0.0804143	0.547067	0.422502	0.559834	0.497004	0.0694929	0.302499	0.2297	1	91	0.632896	1	0.779202	62	13	0.071099	0.137844	0.539702	0.659295	1	0.797209
SYG1 (1)	6.86292	6.73331	-0.129614	0.399026	0.652232	0.40719	0.630057	0.180541	0.203804	0.8859	1	91	0.349083	1	0.549718	62	13	0.0517132	0.174746	0.513648	0.883162	1	0.930264
SYG1 (2)	5.80561	5.68896	-0.116645	0.500844	0.593878	0.515435	0.605885	0.146221	0.282345	0.5179	1	91	0.473583	1	0.660231	62	13	0.0654603	0.168042	0.554591	0.542628	1	0.710513
TDH3	6.22587	6.21594	-0.00992582	0.540067	0.496989	0.542185	0.54249	0.00105878	0.294019	0.0036	1	91	0.952287	1	0.967924	62	13	0.0688576	0.15046	0.504963	0.960929	1	0.979528
TEF1	6.64932	6.47084	-0.178473	0.504202	0.506109	0.511992	0.544961	0.342309	0.267864	1.2779	1	91	0.261261	1	0.455899	62	13	0.0650231	0.151145	0.584367	0.344783	1	0.535827
TKL1	7.56698	7.74406	0.17708	0.595533	0.909396	0.619481	0.829803	0.336985	0.433864	0.7767	1	91	0.380474	1	0.579887	62	13	0.0786742	0.230146	0.527295	0.763474	1	0.849499
TOS1	6.98562	6.93782	-0.0477968	0.454394	0.466358	0.475204	0.470397	0.0245511	0.225072	0.1091	1	91	0.74193	1	0.848509	62	13	0.060351	0.130465	0.504963	0.960929	1	0.979528
UTR2	7.73572	8.00421	0.268492	0.272339	0.299071	0.335782	0.561278	0.774703	0.146001	5.3061	1	91	0.0235287	1	0.0937194	62	13	0.0426443	0.15567	0.76799	0.00255944	1	0.0163943
WSC4	7.86298	8.15181	0.288829	0.316031	0.158568	0.382523	0.457608	0.896511	0.156693	5.7214	1	91	0.0188165	1	0.078006	62	13	0.0485805	0.126918	0.781638	0.00152342	0.722102	0.0106192
XOG1 (EXG1)	5.62641	5.70627	0.0798527	0.614614	0.432841	0.630969	0.518654	0.0685256	0.376897	0.1818	1	91	0.670838	1	0.79296	62	13	0.0801332	0.143849	0.542184	0.639156	1	0.782842
YHV1	7.00746	6.97662	-0.0308363	0.345944	0.466421	0.389394	0.435896	0.0102188	0.157936	0.0647	1	91	0.79979	1	0.889907	62	13	0.0494531	0.120896	0.508685	0.927511	1	0.95574
YOR049C	6.01005	6.94832	0.938268	0.780073	0.50172	0.756089	0.477881	9.4608	0.515238	18.362	1	91	4.52852e-05	0.0214652	0.00049919	62	13	0.0960235	0.13254	0.837469	0.000144683	0.0685798	0.00145914
YPS7 (IPF6613)	8.31579	8.15884	-0.156956	1.28242	0.773522	1.24993	0.750864	0.264747	1.39819	0.1893	1	91	0.66453	1	0.791621	62	13	0.158742	0.208252	0.543424	0.629184	1	0.782764
Controls	Mean1 (Controls)	Mean2 (Ca Patients)	M2-M1	SD1	SD2	bayesSD1	bayesSD2	MSE.B	MSE.W	Fstat	dfBetBayes	dfWithBayes	p.value	Bonferroni	BH	Reps_Cond_1	Reps_Cond_2	StdErr_Cond_1	StdErr_Cond_2	AUC_Cond_1	AUC_PVal_Cond_1	Bonferroni_AUC_Cond_1	BH_AUC_Cond_1
No DNA.01	5.81401	6.10251	0.288495	0.746045	0.813631	0.730235	0.745751	0.894439	0.537008	1.6656	1	91	0.200118	1	0.384033	62	13	0.09274	0.206834	0.598015	0.271891	1	0.461923
No DNA.02	5.91681	6.02333	0.106525	0.694353	0.605856	0.688464	0.61326	0.121949	0.457891	0.2663	1	91	0.607076	1	0.762038	62	13	0.087435	0.170088	0.542184	0.639156	1	0.782842
No DNA.03	6.70156	6.87029	0.168729	0.593911	0.618229	0.597202	0.656002	0.305953	0.368763	0.8297	1	91	0.364766	1	0.564123	62	13	0.0758447	0.181942	0.594293	0.290636	1	0.483373
No DNA.04	6.90115	7.05512	0.153962	0.543974	0.528867	0.546376	0.625627	0.254743	0.313796	0.8118	1	91	0.369967	1	0.567522	62	13	0.0693899	0.173518	0.601737	0.253992	1	0.445897
No DNA.05	5.73001	6.31306	0.583042	0.693641	0.751762	0.692401	0.67975	3.6532	0.476566	7.6657	1	91	0.00681978	1	0.0359175	62	13	0.087935	0.188529	0.719603	0.0134975	1	0.0571236
No DNA.06	5.66449	6.30517	0.640683	0.704361	0.743727	0.708654	0.67602	4.41123	0.494762	8.9159	1	91	0.00363148	1	0.0215165	62	13	0.0899991	0.187494	0.741935	0.00648293	1	0.0326905
No DNA.07	5.78072	5.69087	-0.0898527	0.783086	0.763947	0.768812	0.715909	0.0867634	0.57816	0.1501	1	91	0.699344	1	0.812474	62	13	0.0976392	0.198557	0.537221	0.679684	1	0.803418
No DNA.08	5.72125	6.01556	0.294304	0.709088	0.734531	0.703517	0.68716	0.930822	0.491198	1.895	1	91	0.172017	1	0.351448	62	13	0.0893468	0.190584	0.596774	0.278045	1	0.469016
No DNA.09	6.7896	6.99106	0.20146	0.426499	0.303365	0.458226	0.459327	0.436164	0.210137	2.0756	1	91	0.153103	1	0.323977	62	13	0.0581948	0.127394	0.650124	0.0916868	1	0.234917
No DNA.10	6.71725	6.94214	0.224883	0.407124	0.230626	0.43883	0.333838	0.543483	0.179236	3.0322	1	91	0.0850067	1	0.224852	62	13	0.0557314	0.0925899	0.681141	0.0417026	1	0.126712
No DNA.11	6.38684	5.90803	-0.478806	0.732016	0.647028	0.717619	0.597342	2.46373	0.488978	5.0385	1	91	0.0272136	1	0.102375	62	13	0.0911377	0.165673	0.707196	0.019785	1	0.0756298
No DNA.12	6.4766	6.15851	-0.318095	0.662396	0.706124	0.649775	0.644959	1.0874	0.421183	2.5818	1	91	0.111563	1	0.268356	62	13	0.0825216	0.178879	0.629032	0.147442	1	0.31912
No DNA.13	6.36789	6.88432	0.516435	0.523817	0.868698	0.547525	0.777363	2.86619	0.34984	8.1929	1	91	0.00521839	1	0.0285622	62	13	0.0695358	0.215602	0.7134	0.016378	1	0.0641583
No DNA.14	6.47689	7.04978	0.572899	0.533844	0.754771	0.538581	0.786211	3.52719	0.343997	10.2535	1	91	0.00188006	0.891146	0.0117256	62	13	0.0683999	0.218056	0.744417	0.00595421	1	0.0317112
No DNA.15	6.34721	6.99288	0.645669	0.50287	0.422231	0.543599	0.528318	4.48016	0.292807	15.3007	1	91	0.000176502	0.083662	0.00157853	62	13	0.0690372	0.146529	0.842432	0.000115254	0.0546303	0.0012416
No DNA.16	6.50467	7.17372	0.669053	0.478752	0.434483	0.499224	0.52025	4.81055	0.252749	19.0329	1	91	3.38298e-05	0.0160353	0.000400883	62	13	0.0634016	0.144291	0.853598	6.83448e-05	0.0323955	0.000875553
No DNA.17	5.27745	5.46445	0.187001	0.649107	0.573071	0.643627	0.558976	0.375803	0.397521	0.9454	1	91	0.33347	1	0.535813	62	13	0.0817407	0.155032	0.602978	0.248212	1	0.442303
No DNA.18	5.36831	5.41122	0.0429116	0.754024	0.522583	0.74604	0.536731	0.019789	0.512439	0.0386	1	91	0.844681	1	0.9183	62	13	0.0947471	0.148862	0.531017	0.731665	1	0.835685
Average:	6.16348	6.40844
